# Supplementary material for: Aortic disease in Marfan syndrome is caused by overactivation of sGC-PRKG signaling by NO
Source: PubMed Central journal article supplement (PMC8113458; doi:10.1038/s41467-021-22933-3), 2021-05-11
Supplement: 41467_2021_22933_MOESM5_ESM.pdf [file 41467_2021_22933_MOESM5_ESM.pdf]

| #1 | Immonium  | b <sup>+</sup> | b <sup>2+</sup> | b <sup>3+</sup> | Seq.              | y <sup>+</sup> | y <sup>2+</sup> | y <sup>3+</sup> | #2 |
|----|-----------|----------------|-----------------|-----------------|-------------------|----------------|-----------------|-----------------|----|
| 1  | 273.21241 | 301.20732      | 151.10730       | 101.07396       | A-TMT6plex        |                |                 |                 | 17 |
| 2  | 102.05496 | 430.24992      | 215.62860       | 144.08816       | E                 | 2376.19395     | 1188.60061      | 792.73617       | 16 |
| 3  | 86.09643  | 543.33398      | 272.17063       | 181.78284       | L                 | 2247.15136     | 1124.07932      | 749.72197       | 15 |
| 4  | 44.04948  | 614.37109      | 307.68918       | 205.46188       | A                 | 2134.06730     | 1067.53729      | 712.02728       | 14 |
| 5  | 330.27026 | 971.62899      | 486.31813       | 324.54785       | K-TMT6plex        | 2063.03018     | 1032.01873      | 688.34824       | 13 |
| 6  | 181.06077 | 1179.67739     | 590.34234       | 393.89732       | Y-Nitro           | 1705.77229     | 853.38978       | 569.26228       | 12 |
| 7  | 104.05285 | 1310.71788     | 655.86258       | 437.57748       | M                 | 1497.72388     | 749.36558       | 499.91281       | 11 |
| 8  | 133.04301 | 1470.74853     | 735.87790       | 490.92103       | C-Carbamidomethyl | 1366.68340     | 683.84534       | 456.23265       | 10 |
| 9  | 102.05496 | 1599.79112     | 800.39920       | 533.93522       | E                 | 1206.65275     | 603.83001       | 402.88910       | 9  |
| 10 | 87.05529  | 1713.83405     | 857.42066       | 571.94953       | N                 | 1077.61015     | 539.30872       | 359.87490       | 8  |
| 11 | 101.07094 | 1841.89263     | 921.44995       | 614.63573       | Q                 | 963.56723      | 482.28725       | 321.86059       | 7  |
| 12 | 44.04948  | 1912.92974     | 956.96851       | 638.31476       | A                 | 835.50865      | 418.25796       | 279.17440       | 6  |
| 13 | 74.06004  | 2013.97742     | 1007.49235      | 671.99732       | T                 | 764.47154      | 382.73941       | 255.49536       | 5  |
| 14 | 86.09643  | 2127.06148     | 1064.03438      | 709.69201       | I                 | 663.42386      | 332.21557       | 221.81280       | 4  |
| 15 | 60.04439  | 2214.09351     | 1107.55039      | 738.70269       | S                 | 550.33979      | 275.67353       | 184.11812       | 3  |
| 16 | 60.04439  | 2301.12554     | 1151.06641      | 767.71336       | S                 | 463.30776      | 232.15752       | 155.10744       | 2  |
| 17 | 330.27026 |                |                 |                 | K-TMT6plex        | 376.27574      | 188.64151       | 126.09676       | 1  |

JM\_NDplasmaBVM\_TMT\_Fr3.raw #39312 RT: 134.1754 min  
 FTMS, 892.8037@hcd35.00, z=+3, Mono m/z=892.80371 Da, MH+=2676.39658 Da, Match Tol.=0.02 Da

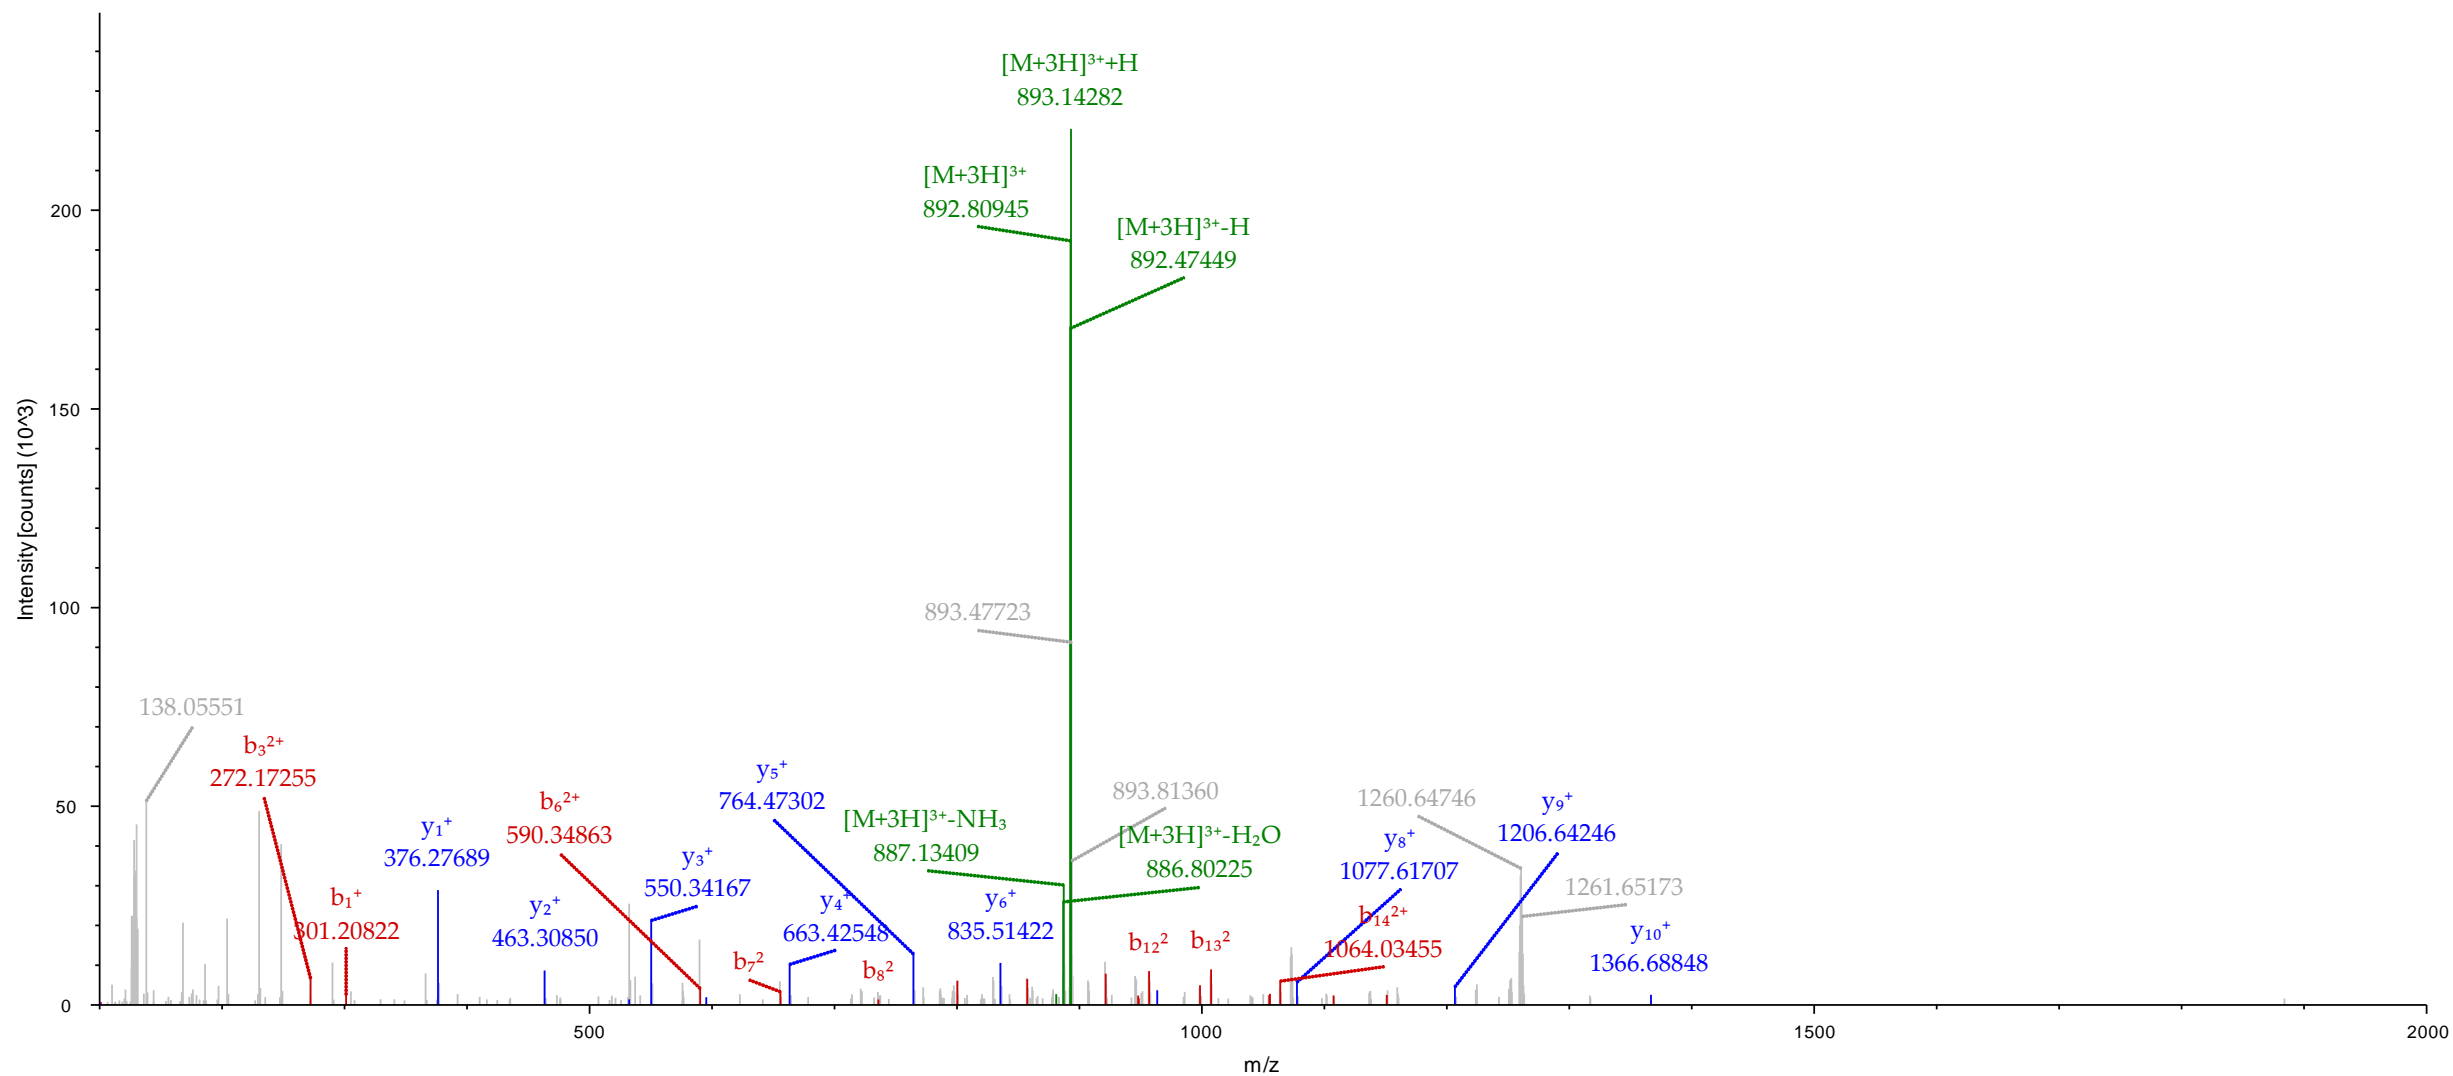

— Pre+H, Precursor, Precursor-H<sub>2</sub>O, Precursor-H<sub>2</sub>O-NH<sub>3</sub>, Precursor-NH<sub>3</sub>, Pre-H  
— y, y-H<sub>2</sub>O, y-NH<sub>3</sub>  
— Immonium  
— b, b-H<sub>2</sub>O, b-NH<sub>3</sub>

| #1 | Immonium  | b <sup>+</sup> | b <sup>2+</sup> | b <sup>3+</sup> | Seq.              | y <sup>+</sup> | y <sup>2+</sup> | y <sup>3+</sup> | #2 |
|----|-----------|----------------|-----------------|-----------------|-------------------|----------------|-----------------|-----------------|----|
| 1  | 315.25936 | 343.25427      | 172.13077       | 115.08961       | L-TMT6plex        |                |                 |                 | 20 |
| 2  | 133.04301 | 503.28492      | 252.14610       | 168.43316       | C-Carbamidomethyl | 2558.16351     | 1279.58539      | 853.39269       | 19 |
| 3  | 44.04948  | 574.32203      | 287.66466       | 192.11220       | A                 | 2398.13286     | 1199.57007      | 800.04914       | 18 |
| 4  | 86.09643  | 687.40610      | 344.20669       | 229.80688       | I                 | 2327.09575     | 1164.05151      | 776.37010       | 17 |
| 5  | 70.06513  | 784.45886      | 392.73307       | 262.15781       | P                 | 2214.01168     | 1107.50948      | 738.67541       | 16 |
| 6  | 87.05529  | 898.50179      | 449.75453       | 300.17211       | N                 | 2116.95892     | 1058.98310      | 706.32449       | 15 |
| 7  | 86.09643  | 1011.58585     | 506.29657       | 337.86680       | L                 | 2002.91599     | 1001.96163      | 668.31018       | 14 |
| 8  | 129.11347 | 1167.68696     | 584.34712       | 389.90051       | R                 | 1889.83193     | 945.41960       | 630.61549       | 13 |
| 9  | 102.05496 | 1296.72956     | 648.86842       | 432.91470       | E                 | 1733.73082     | 867.36905       | 578.58179       | 12 |
| 10 | 87.05529  | 1410.77249     | 705.88988       | 470.92901       | N                 | 1604.68822     | 802.84775       | 535.56759       | 11 |
| 11 | 181.06077 | 1618.82089     | 809.91408       | 540.27848       | Y-Nitro           | 1490.64530     | 745.82629       | 497.55328       | 10 |
| 12 | 30.03383  | 1675.84236     | 838.42482       | 559.28564       | G                 | 1282.59689     | 641.80208       | 428.20381       | 9  |
| 13 | 102.05496 | 1804.88495     | 902.94611       | 602.29983       | E                 | 1225.57543     | 613.29135       | 409.19666       | 8  |
| 14 | 86.09643  | 1917.96901     | 959.48814       | 639.99452       | L                 | 1096.53283     | 548.77005       | 366.18246       | 7  |
| 15 | 44.04948  | 1989.00613     | 995.00670       | 663.67356       | A                 | 983.44877      | 492.22802       | 328.48777       | 6  |
| 16 | 88.03930  | 2104.03307     | 1052.52017      | 702.01587       | D                 | 912.41165      | 456.70947       | 304.80874       | 5  |
| 17 | 133.04301 | 2264.06372     | 1132.53550      | 755.35942       | C-Carbamidomethyl | 797.38471      | 399.19599       | 266.46642       | 4  |
| 18 | 133.04301 | 2424.09437     | 1212.55082      | 808.70297       | C-Carbamidomethyl | 637.35406      | 319.18067       | 213.12287       | 3  |
| 19 | 74.06004  | 2525.14204     | 1263.07466      | 842.38553       | T                 | 477.32341      | 239.16535       | 159.77932       | 2  |
| 20 | 330.27026 |                |                 |                 | K-TMT6plex        | 376.27574      | 188.64151       | 126.09676       | 1  |

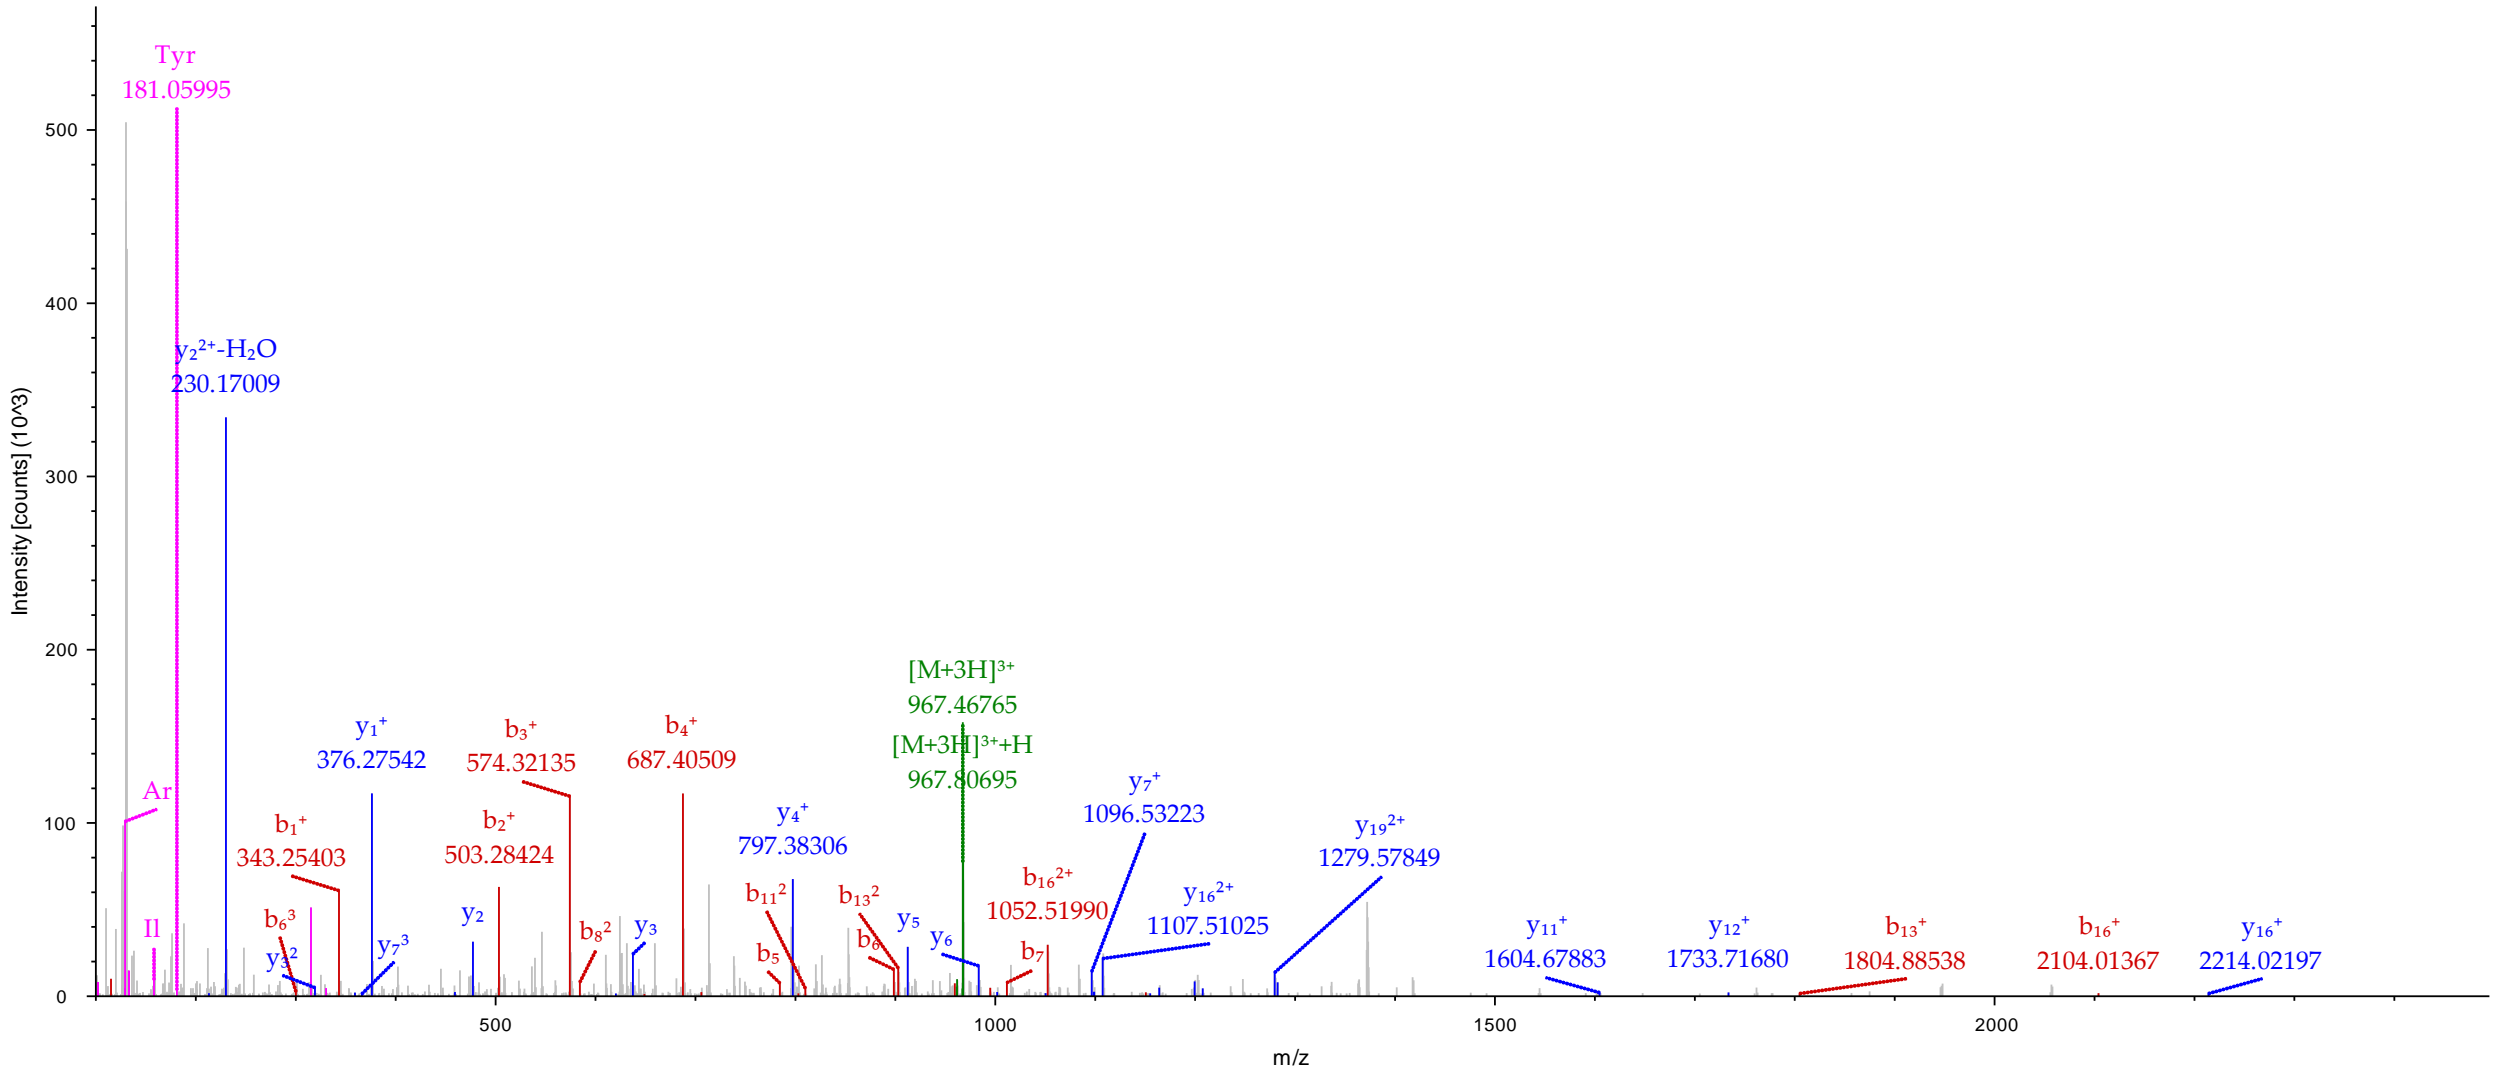

— Pre+H, Precursor, Precursor-H<sub>2</sub>O, Precursor-H<sub>2</sub>O-NH<sub>3</sub>, Precursor-NH<sub>3</sub>, Pre-H — Immonium  
— y, y-H<sub>2</sub>O, y-NH<sub>3</sub> — b, b-H<sub>2</sub>O, b-NH<sub>3</sub>

| #1 | Immonium  | b <sup>+</sup> | b <sup>2+</sup> | b <sup>3+</sup> | b <sup>4+</sup> | Seq.                       | y <sup>+</sup> | y <sup>2+</sup> | y <sup>3+</sup> | y <sup>4+</sup> | #2 |
|----|-----------|----------------|-----------------|-----------------|-----------------|----------------------------|----------------|-----------------|-----------------|-----------------|----|
| 1  | 362.20594 | 390.20086      | 195.60407       | 130.73847       | 98.30567        | C-TMT6plex-Carbamidomethyl |                |                 |                 |                 | 26 |
| 2  | 133.04301 | 550.23151      | 275.61939       | 184.08202       | 138.31333       | C-Carbamidomethyl          | 3064.45934     | 1532.73331      | 1022.15796      | 766.87029       | 25 |
| 3  | 44.04948  | 621.26862      | 311.13795       | 207.76106       | 156.07261       | A                          | 2904.42869     | 1452.71798      | 968.81441       | 726.86263       | 24 |
| 4  | 102.05496 | 750.31121      | 375.65924       | 250.77526       | 188.33326       | E                          | 2833.39158     | 1417.19943      | 945.13538       | 709.10335       | 23 |
| 5  | 44.04948  | 821.34833      | 411.17780       | 274.45429       | 206.09254       | A                          | 2704.34898     | 1352.67813      | 902.12118       | 676.84270       | 22 |
| 6  | 87.05529  | 935.39125      | 468.19927       | 312.46860       | 234.60327       | N                          | 2633.31187     | 1317.15957      | 878.44214       | 659.08342       | 21 |
| 7  | 70.06513  | 1032.44402     | 516.72565       | 344.81952       | 258.86646       | P                          | 2519.26894     | 1260.13811      | 840.42783       | 630.57269       | 20 |
| 8  | 70.06513  | 1129.49678     | 565.25203       | 377.17044       | 283.12965       | P                          | 2422.21618     | 1211.61173      | 808.07691       | 606.30950       | 19 |
| 9  | 44.04948  | 1200.53389     | 600.77059       | 400.84948       | 300.88893       | A                          | 2325.16341     | 1163.08535      | 775.72599       | 582.04631       | 18 |
| 10 | 133.04301 | 1360.56454     | 680.78591       | 454.19303       | 340.89659       | C-Carbamidomethyl          | 2254.12630     | 1127.56679      | 752.04695       | 564.28703       | 17 |
| 11 | 181.06077 | 1568.61295     | 784.81011       | 523.54250       | 392.90869       | Y-Nitro                    | 2094.09565     | 1047.55146      | 698.70340       | 524.27937       | 16 |
| 12 | 30.03383  | 1625.63441     | 813.32085       | 542.54966       | 407.16406       | G                          | 1886.04725     | 943.52726       | 629.35393       | 472.26727       | 15 |
| 13 | 74.06004  | 1726.68209     | 863.84468       | 576.23222       | 432.42598       | T                          | 1829.02578     | 915.01653       | 610.34678       | 458.01190       | 14 |
| 14 | 72.08078  | 1825.75051     | 913.37889       | 609.25502       | 457.19308       | V                          | 1727.97810     | 864.49269       | 576.66422       | 432.74998       | 13 |
| 15 | 86.09643  | 1938.83457     | 969.92092       | 646.94971       | 485.46410       | L                          | 1628.90969     | 814.95848       | 543.64141       | 407.98288       | 12 |
| 16 | 44.04948  | 2009.87168     | 1005.43948      | 670.62875       | 503.22338       | A                          | 1515.82563     | 758.41645       | 505.94673       | 379.71186       | 11 |
| 17 | 102.05496 | 2138.91428     | 1069.96078      | 713.64294       | 535.48403       | E                          | 1444.78851     | 722.89789       | 482.26769       | 361.95259       | 10 |
| 18 | 120.08078 | 2285.98269     | 1143.49498      | 762.66575       | 572.25113       | F                          | 1315.74592     | 658.37660       | 439.25349       | 329.69194       | 9  |
| 19 | 101.07094 | 2414.04127     | 1207.52427      | 805.35194       | 604.26577       | Q                          | 1168.67751     | 584.84239       | 390.23069       | 292.92483       | 8  |
| 20 | 70.06513  | 2511.09403     | 1256.05065      | 837.70286       | 628.52897       | P                          | 1040.61893     | 520.81310       | 347.54449       | 260.91019       | 7  |
| 21 | 86.09643  | 2624.17810     | 1312.59269      | 875.39755       | 656.79998       | L                          | 943.56616      | 472.28672       | 315.19357       | 236.64700       | 6  |
| 22 | 72.08078  | 2723.24651     | 1362.12689      | 908.42035       | 681.56708       | V                          | 830.48210      | 415.74469       | 277.49888       | 208.37598       | 5  |
| 23 | 102.05496 | 2852.28910     | 1426.64819      | 951.43455       | 713.82773       | E                          | 731.41369      | 366.21048       | 244.47608       | 183.60888       | 4  |
| 24 | 102.05496 | 2981.33170     | 1491.16949      | 994.44875       | 746.08838       | E                          | 602.37109      | 301.68918       | 201.46188       | 151.34823       | 3  |
| 25 | 70.06513  | 3078.38446     | 1539.69587      | 1026.79967      | 770.35157       | P                          | 473.32850      | 237.16789       | 158.44768       | 119.08758       | 2  |
| 26 | 330.27026 |                |                 |                 |                 | K-TMT6plex                 | 376.27574      | 188.64151       | 126.09676       | 94.82439        | 1  |

JM\_NDplasmaBVM\_TMT\_NoFrac.raw #124104 RT: 334.8482 min  
FTMS, 864.6786@hcd35.00, z=+4, Mono m/z=864.17670 Da, MH+=3453.68496 Da, Match Tol.=0.02 Da

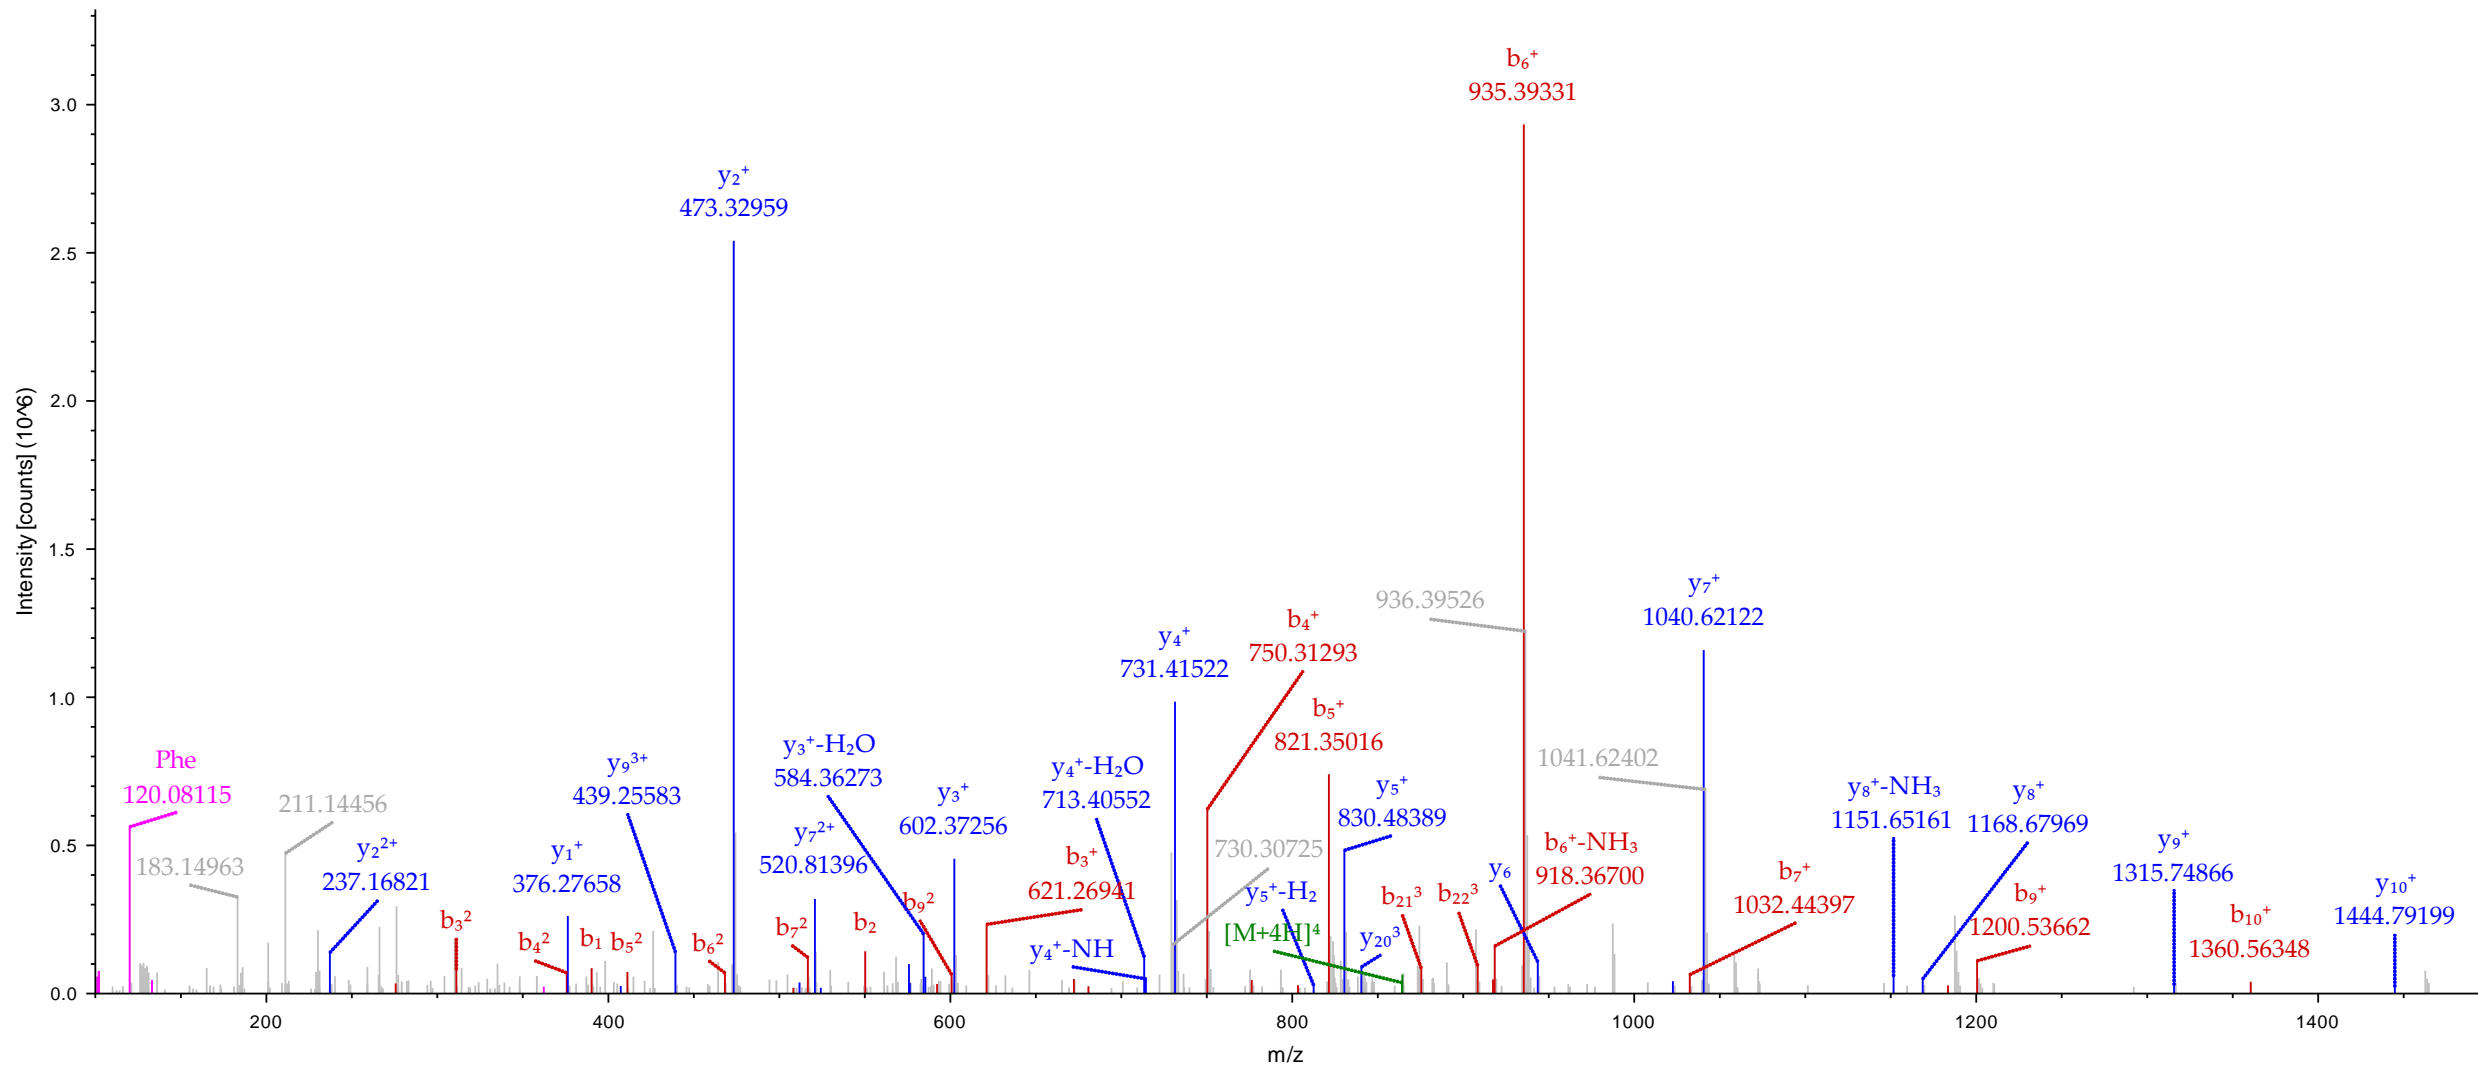

— Pre+H, Precursor, Precursor-H<sub>2</sub>O, Precursor-H<sub>2</sub>O-NH<sub>3</sub>, Precursor-NH<sub>3</sub>, Pre-H — Immonium  
— y, y-H<sub>2</sub>O, y-NH<sub>3</sub> — b, b-H<sub>2</sub>O, b-NH<sub>3</sub>

| #1 | Immonium  | b <sup>+</sup> | b <sup>2+</sup> | Seq.       | y <sup>+</sup> | y <sup>2+</sup> | #2 |
|----|-----------|----------------|-----------------|------------|----------------|-----------------|----|
| 1  | 331.21789 | 359.21280      | 180.11004       | E-TMT6plex |                |                 | 16 |
| 2  | 87.05529  | 473.25573      | 237.13150       | N          | 1817.83878     | 909.42303       | 15 |
| 3  | 70.06513  | 570.30849      | 285.65788       | P          | 1703.79585     | 852.40156       | 14 |
| 4  | 74.06004  | 671.35617      | 336.18172       | T          | 1606.74309     | 803.87518       | 13 |
| 5  | 74.06004  | 772.40385      | 386.70556       | T          | 1505.69541     | 753.35134       | 12 |
| 6  | 120.08078 | 919.47226      | 460.23977       | F          | 1404.64773     | 702.82750       | 11 |
| 7  | 104.05285 | 1050.51275     | 525.76001       | M          | 1257.57932     | 629.29330       | 10 |
| 8  | 30.03383  | 1107.53421     | 554.27074       | G          | 1126.53883     | 563.77305       | 9  |
| 9  | 110.07127 | 1244.59312     | 622.80020       | H          | 1069.51737     | 535.26232       | 8  |
| 10 | 181.06077 | 1452.64153     | 726.82440       | Y-Nitro    | 932.45846      | 466.73287       | 7  |
| 11 | 86.09643  | 1565.72559     | 783.36644       | L          | 724.41005      | 362.70866       | 6  |
| 12 | 110.07127 | 1702.78451     | 851.89589       | H          | 611.32598      | 306.16663       | 5  |
| 13 | 102.05496 | 1831.82710     | 916.41719       | E          | 474.26707      | 237.63717       | 4  |
| 14 | 72.08078  | 1930.89551     | 965.95139       | V          | 345.22448      | 173.11588       | 3  |
| 15 | 44.04948  | 2001.93263     | 1001.46995      | A          | 246.15607      | 123.58167       | 2  |
| 16 | 129.11347 |                |                 | R          | 175.11895      | 88.06311        | 1  |

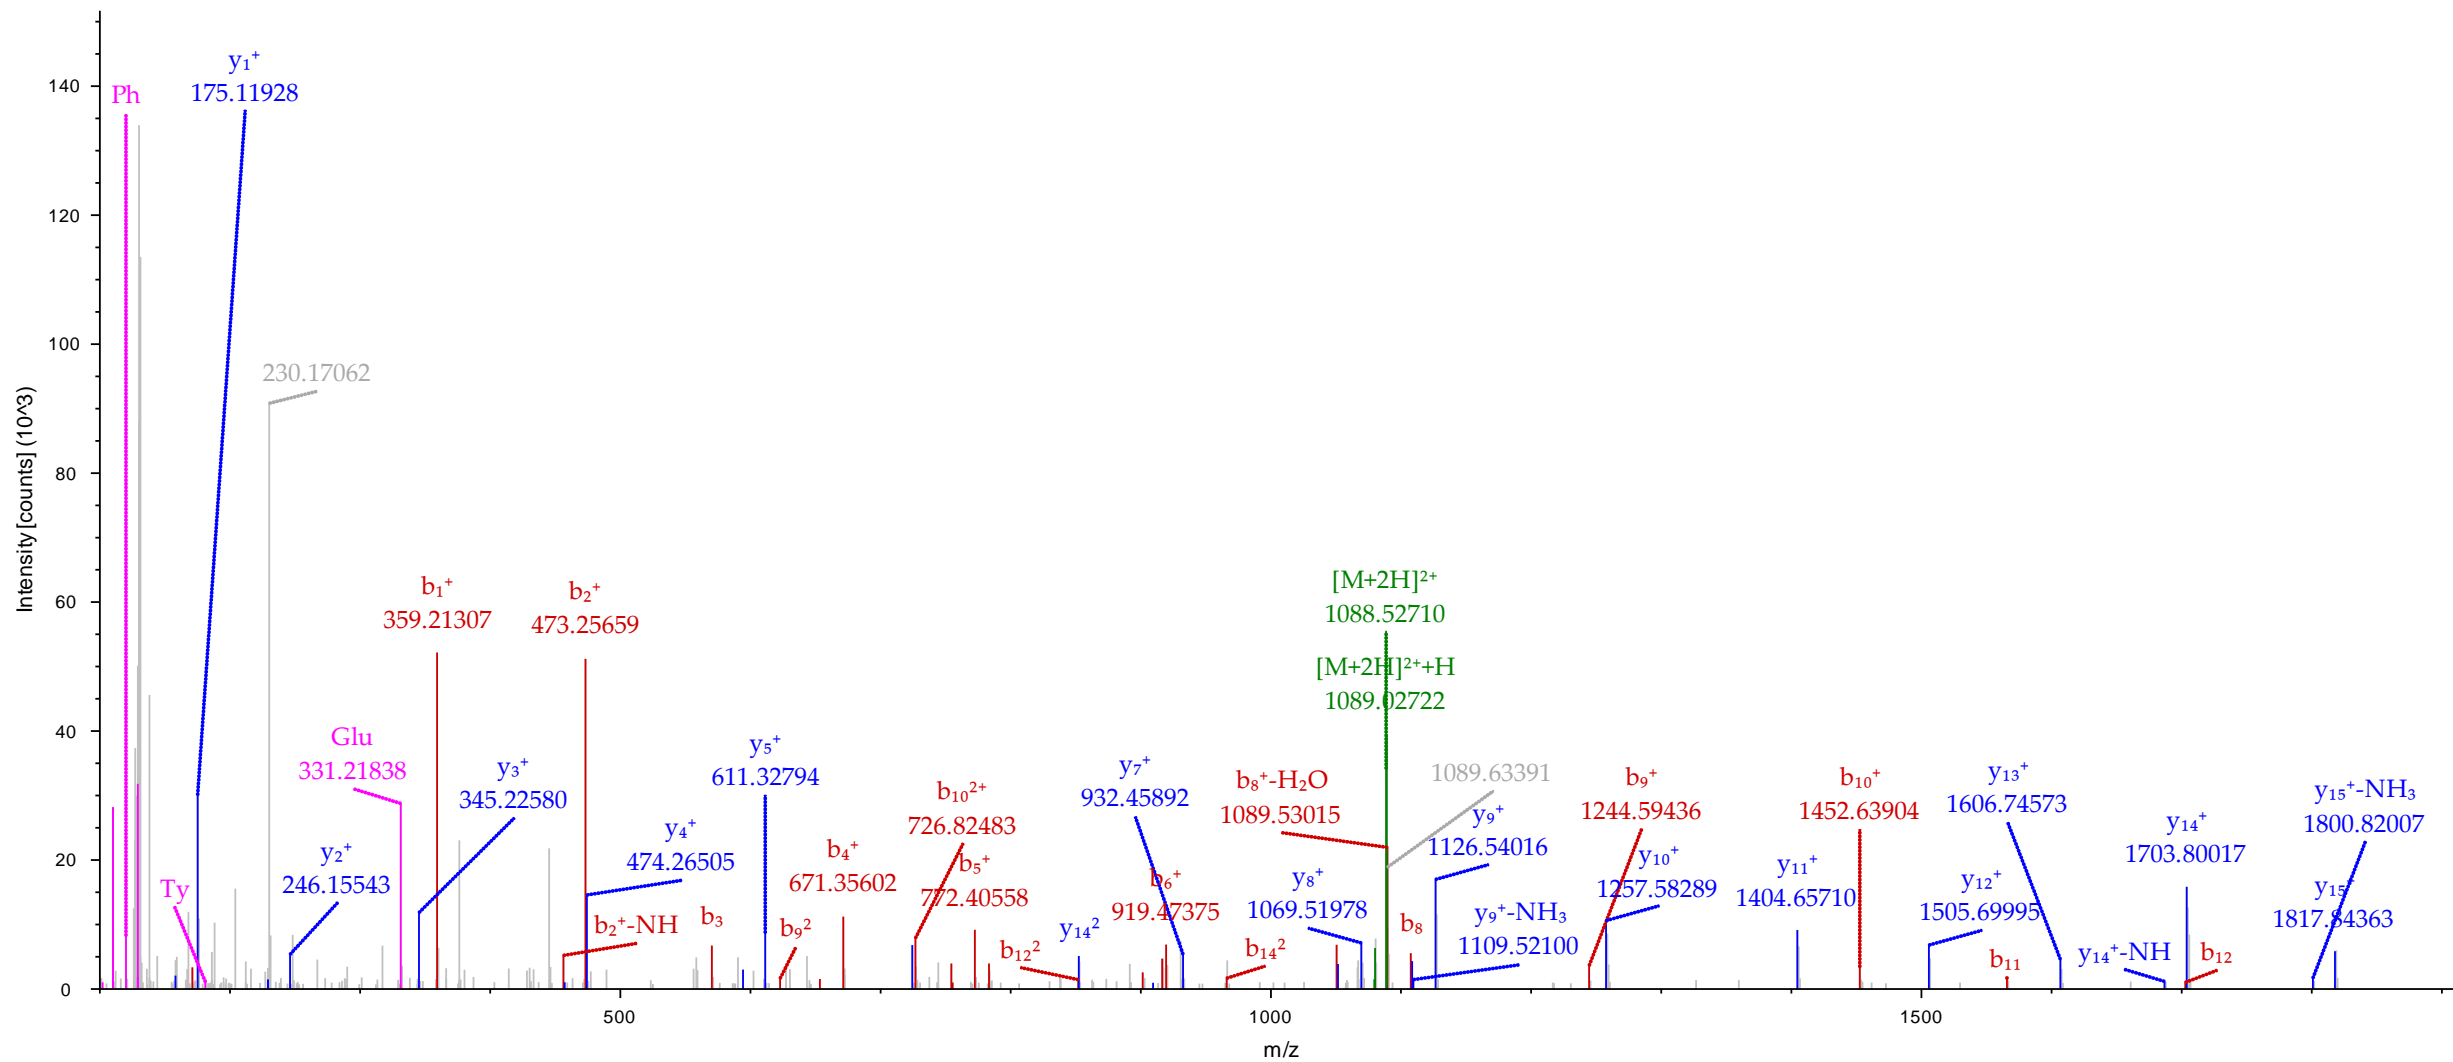

— Pre+H, Precursor, Precursor-H<sub>2</sub>O, Precursor-H<sub>2</sub>O-NH<sub>3</sub>, Precursor-NH<sub>3</sub>, Pre-H — Immonium

— y, y-H<sub>2</sub>O, y-NH<sub>3</sub>

— b, b-H<sub>2</sub>O, b-NH<sub>3</sub>



| #1 | Immonium  | b <sup>+</sup> | b <sup>2+</sup> | b <sup>3+</sup> | b <sup>4+</sup> | b <sup>5+</sup> | Seq.              | y <sup>+</sup> | y <sup>2+</sup> | y <sup>3+</sup> | y <sup>4+</sup> | y <sup>5+</sup> | #2 |
|----|-----------|----------------|-----------------|-----------------|-----------------|-----------------|-------------------|----------------|-----------------|-----------------|-----------------|-----------------|----|
| 1  | 339.23421 | 367.22912      | 184.11820       | 123.08122       | 92.56274        | 74.25165        | H-TMT6plex        |                |                 |                 |                 |                 | 36 |
| 2  | 70.06513  | 464.28188      | 232.64458       | 155.43215       | 116.82593       | 93.66220        | P                 | 4781.25015     | 2391.12871      | 1594.42157      | 1196.06800      | 957.05585       | 35 |
| 3  | 136.07569 | 627.34521      | 314.17624       | 209.78659       | 157.59176       | 126.27486       | Y                 | 4684.19739     | 2342.60233      | 1562.07065      | 1171.80480      | 937.64530       | 34 |
| 4  | 120.08078 | 774.41363      | 387.71045       | 258.80939       | 194.35886       | 155.68855       | F                 | 4521.13406     | 2261.07067      | 1507.71620      | 1131.03897      | 905.03263       | 33 |
| 5  | 136.07569 | 937.47696      | 469.24212       | 313.16384       | 235.12470       | 188.30121       | Y                 | 4374.06565     | 2187.53646      | 1458.69340      | 1094.27187      | 875.61895       | 32 |
| 6  | 44.04948  | 1008.51407     | 504.76067       | 336.84287       | 252.88397       | 202.50864       | A                 | 4211.00232     | 2106.00480      | 1404.33896      | 1053.50604      | 843.00628       | 31 |
| 7  | 70.06513  | 1105.56683     | 553.28705       | 369.19380       | 277.14717       | 221.91919       | P                 | 4139.96520     | 2070.48624      | 1380.65992      | 1035.74676      | 828.79886       | 30 |
| 8  | 102.05496 | 1234.60943     | 617.80835       | 412.20799       | 309.40781       | 247.72771       | E                 | 4042.91244     | 2021.95986      | 1348.30900      | 1011.48357      | 809.38831       | 29 |
| 9  | 86.09643  | 1347.69349     | 674.35038       | 449.90268       | 337.67883       | 270.34452       | L                 | 3913.86985     | 1957.43856      | 1305.29480      | 979.22292       | 783.57979       | 28 |
| 10 | 86.09643  | 1460.77755     | 730.89242       | 487.59737       | 365.94985       | 292.96133       | L                 | 3800.78578     | 1900.89653      | 1267.60011      | 950.95190       | 760.96298       | 27 |
| 11 | 136.07569 | 1623.84088     | 812.42408       | 541.95181       | 406.71568       | 325.57400       | Y                 | 3687.70172     | 1844.35450      | 1229.90542      | 922.68089       | 738.34617       | 26 |
| 12 | 136.07569 | 1786.90421     | 893.95574       | 596.30625       | 447.48151       | 358.18666       | Y                 | 3524.63839     | 1762.82283      | 1175.55098      | 881.91506       | 705.73350       | 25 |
| 13 | 44.04948  | 1857.94132     | 929.47430       | 619.98529       | 465.24079       | 372.39409       | A                 | 3361.57506     | 1681.29117      | 1121.19654      | 841.14922       | 673.12083       | 24 |
| 14 | 102.05496 | 1986.98392     | 993.99560       | 662.99949       | 497.50144       | 398.20260       | E                 | 3290.53795     | 1645.77261      | 1097.51750      | 823.38994       | 658.91341       | 23 |
| 15 | 101.07094 | 2115.04249     | 1058.02489      | 705.68568       | 529.51608       | 423.81432       | Q                 | 3161.49536     | 1581.25132      | 1054.50330      | 791.12930       | 633.10489       | 22 |
| 16 | 181.06077 | 2323.09090     | 1162.04909      | 775.03515       | 581.52818       | 465.42400       | Y-Nitro           | 3033.43678     | 1517.22203      | 1011.81711      | 759.11465       | 607.49318       | 21 |
| 17 | 87.05529  | 2437.13383     | 1219.07055      | 813.04946       | 610.03891       | 488.23259       | N                 | 2825.38837     | 1413.19782      | 942.46764       | 707.10255       | 565.88350       | 20 |
| 18 | 102.05496 | 2566.17642     | 1283.59185      | 856.06366       | 642.29956       | 514.04111       | E                 | 2711.34544     | 1356.17636      | 904.45333       | 678.59182       | 543.07491       | 19 |
| 19 | 86.09643  | 2679.26049     | 1340.13388      | 893.75835       | 670.57058       | 536.65792       | I                 | 2582.30285     | 1291.65506      | 861.43913       | 646.33117       | 517.26639       | 18 |
| 20 | 86.09643  | 2792.34455     | 1396.67591      | 931.45303       | 698.84159       | 559.27473       | L                 | 2469.21879     | 1235.11303      | 823.74445       | 618.06015       | 494.64958       | 17 |
| 21 | 74.06004  | 2893.39223     | 1447.19975      | 965.13559       | 724.10351       | 579.48427       | T                 | 2356.13472     | 1178.57100      | 786.04976       | 589.78914       | 472.03277       | 16 |
| 22 | 101.07094 | 3021.45081     | 1511.22904      | 1007.82179      | 756.11816       | 605.09598       | Q                 | 2255.08704     | 1128.04716      | 752.36720       | 564.52722       | 451.82323       | 15 |
| 23 | 133.04301 | 3181.48145     | 1591.24437      | 1061.16534      | 796.12582       | 637.10211       | C-Carbamidomethyl | 2127.02847     | 1064.01787      | 709.68101       | 532.51257       | 426.21151       | 14 |
| 24 | 133.04301 | 3341.51210     | 1671.25969      | 1114.50889      | 836.13348       | 669.10824       | C-Carbamidomethyl | 1966.99782     | 984.00255       | 656.33746       | 492.50491       | 394.20539       | 13 |
| 25 | 44.04948  | 3412.54922     | 1706.77825      | 1138.18792      | 853.89276       | 683.31566       | A                 | 1806.96717     | 903.98722       | 602.99391       | 452.49725       | 362.19926       | 12 |
| 26 | 102.05496 | 3541.59181     | 1771.29954      | 1181.20212      | 886.15341       | 709.12418       | E                 | 1735.93006     | 868.46867       | 579.31487       | 434.73797       | 347.99183       | 11 |
| 27 | 44.04948  | 3612.62892     | 1806.81810      | 1204.88116      | 903.91269       | 723.33161       | A                 | 1606.88746     | 803.94737       | 536.30067       | 402.47732       | 322.18331       | 10 |
| 28 | 88.03930  | 3727.65587     | 1864.33157      | 1243.22347      | 932.66942       | 746.33699       | D                 | 1535.85035     | 768.42881       | 512.62163       | 384.71805       | 307.97589       | 9  |
| 29 | 330.27026 | 4084.91376     | 2042.96052      | 1362.30944      | 1021.98390      | 817.78857       | K-TMT6plex        | 1420.82341     | 710.91534       | 474.27932       | 355.96131       | 284.97050       | 8  |
| 30 | 102.05496 | 4213.95635     | 2107.48182      | 1405.32364      | 1054.24455      | 843.59709       | E                 | 1063.56551     | 532.28639       | 355.19336       | 266.64684       | 213.51892       | 7  |
| 31 | 60.04439  | 4300.98838     | 2150.99783      | 1434.33431      | 1076.00255      | 861.00350       | S                 | 934.52292      | 467.76510       | 312.17916       | 234.38619       | 187.71041       | 6  |
| 32 | 133.04301 | 4461.01903     | 2231.01315      | 1487.67786      | 1116.01022      | 893.00963       | C-Carbamidomethyl | 847.49089      | 424.24908       | 283.16848       | 212.62818       | 170.30400       | 5  |
| 33 | 86.09643  | 4574.10309     | 2287.55519      | 1525.37255      | 1144.28123      | 915.62644       | L                 | 687.46024      | 344.23376       | 229.82493       | 172.62052       | 138.29787       | 4  |
| 34 | 74.06004  | 4675.15077     | 2338.07902      | 1559.05511      | 1169.54315      | 935.83598       | T                 | 574.37618      | 287.69173       | 192.13024       | 144.34950       | 115.68106       | 3  |
| 35 | 70.06513  | 4772.20354     | 2386.60541      | 1591.40603      | 1193.80634      | 955.24653       | P                 | 473.32850      | 237.16789       | 158.44768       | 119.08758       | 95.47152        | 2  |
| 36 | 330.27026 |                |                 |                 |                 |                 | K-TMT6plex        | 376.27574      | 188.64151       | 126.09676       | 94.82439        | 76.06097        | 1  |

Nitro-Tyr immonium ion is detected in MS/MS spectra and added brown colored in the following spectrum

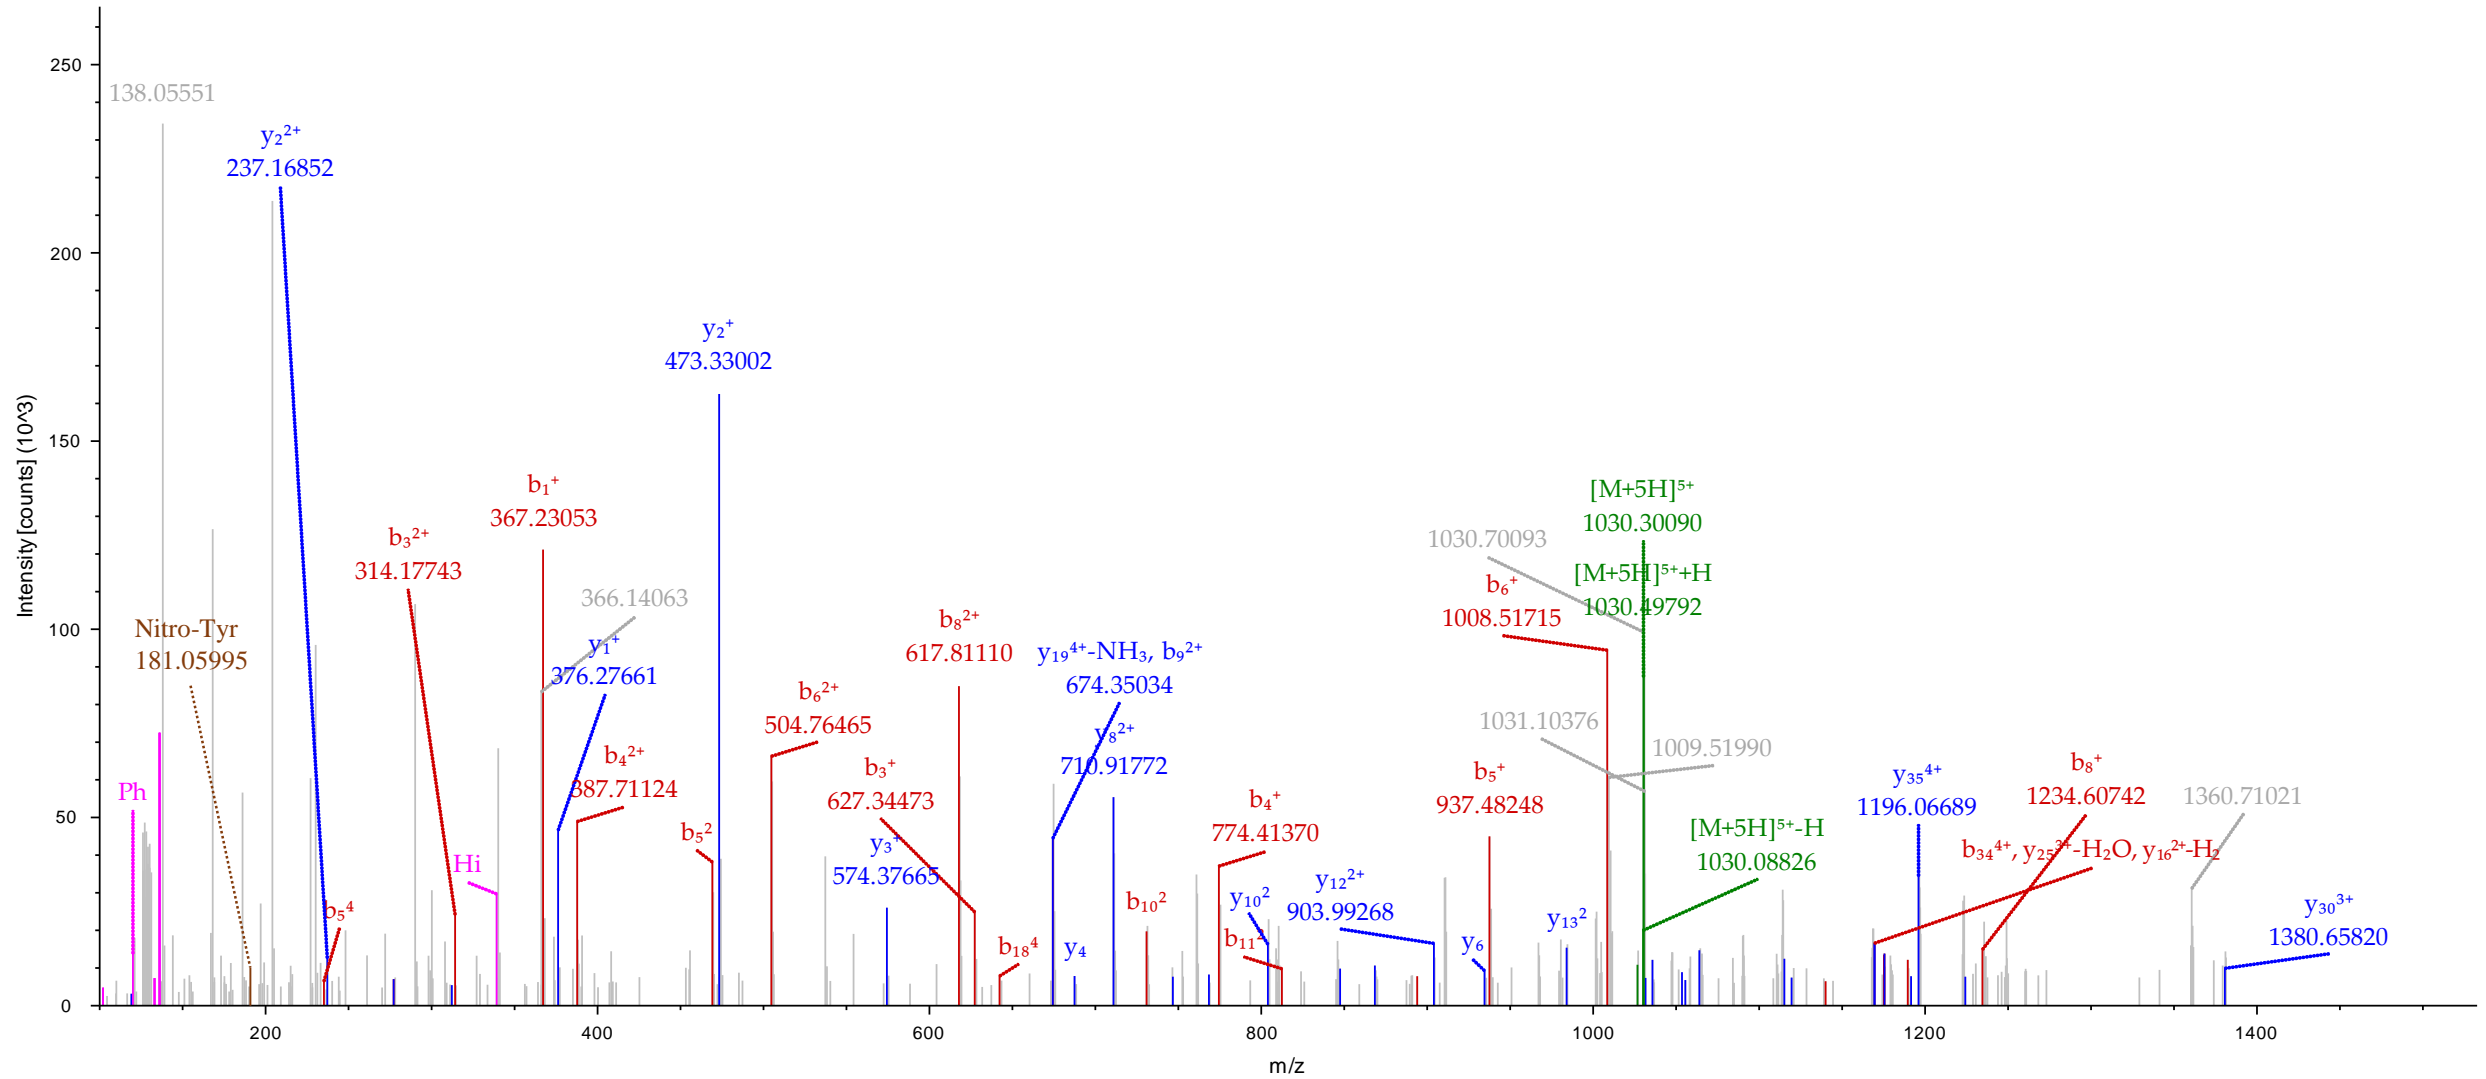

— Pre+H, Precursor, Precursor-H<sub>2</sub>O, Precursor-H<sub>2</sub>O-NH<sub>3</sub>, Precursor-NH<sub>3</sub>, Pre-H — Immonium

— y, y-H<sub>2</sub>O, y-NH<sub>3</sub>

— b, b-H<sub>2</sub>O, b-NH<sub>3</sub>

| #1 | Immonium  | b <sup>+</sup> | b <sup>2+</sup> | b <sup>3+</sup> | Seq.       | y <sup>+</sup> | y <sup>2+</sup> | y <sup>3+</sup> | #2 |
|----|-----------|----------------|-----------------|-----------------|------------|----------------|-----------------|-----------------|----|
| 1  | 259.19676 | 287.19167      | 144.09947       | 96.40208        | G-TMT6plex |                |                 |                 | 13 |
| 2  | 86.09643  | 400.27574      | 200.64151       | 134.09676       | L          | 1696.98352     | 848.99540       | 566.33269       | 12 |
| 3  | 72.08078  | 499.34415      | 250.17571       | 167.11957       | V          | 1583.89946     | 792.45337       | 528.63800       | 11 |
| 4  | 86.09643  | 612.42821      | 306.71775       | 204.81426       | L          | 1484.83105     | 742.91916       | 495.61520       | 10 |
| 5  | 86.09643  | 725.51228      | 363.25978       | 242.50894       | I          | 1371.74698     | 686.37713       | 457.92051       | 9  |
| 6  | 44.04948  | 796.54939      | 398.77833       | 266.18798       | A          | 1258.66292     | 629.83510       | 420.22582       | 8  |
| 7  | 120.08078 | 943.61781      | 472.31254       | 315.21079       | F          | 1187.62580     | 594.31654       | 396.54679       | 7  |
| 8  | 60.04439  | 1030.64983     | 515.82856       | 344.22146       | S          | 1040.55739     | 520.78233       | 347.52398       | 6  |
| 9  | 101.07094 | 1158.70841     | 579.85784       | 386.90765       | Q          | 953.52536      | 477.26632       | 318.51330       | 5  |
| 10 | 181.06077 | 1366.75682     | 683.88205       | 456.25712       | Y-Nitro    | 825.46678      | 413.23703       | 275.82711       | 4  |
| 11 | 86.09643  | 1479.84088     | 740.42408       | 493.95181       | L          | 617.41838      | 309.21283       | 206.47764       | 3  |
| 12 | 101.07094 | 1607.89946     | 804.45337       | 536.63800       | Q          | 504.33431      | 252.67080       | 168.78296       | 2  |
| 13 | 330.27026 |                |                 |                 | K-TMT6plex | 376.27574      | 188.64151       | 126.09676       | 1  |

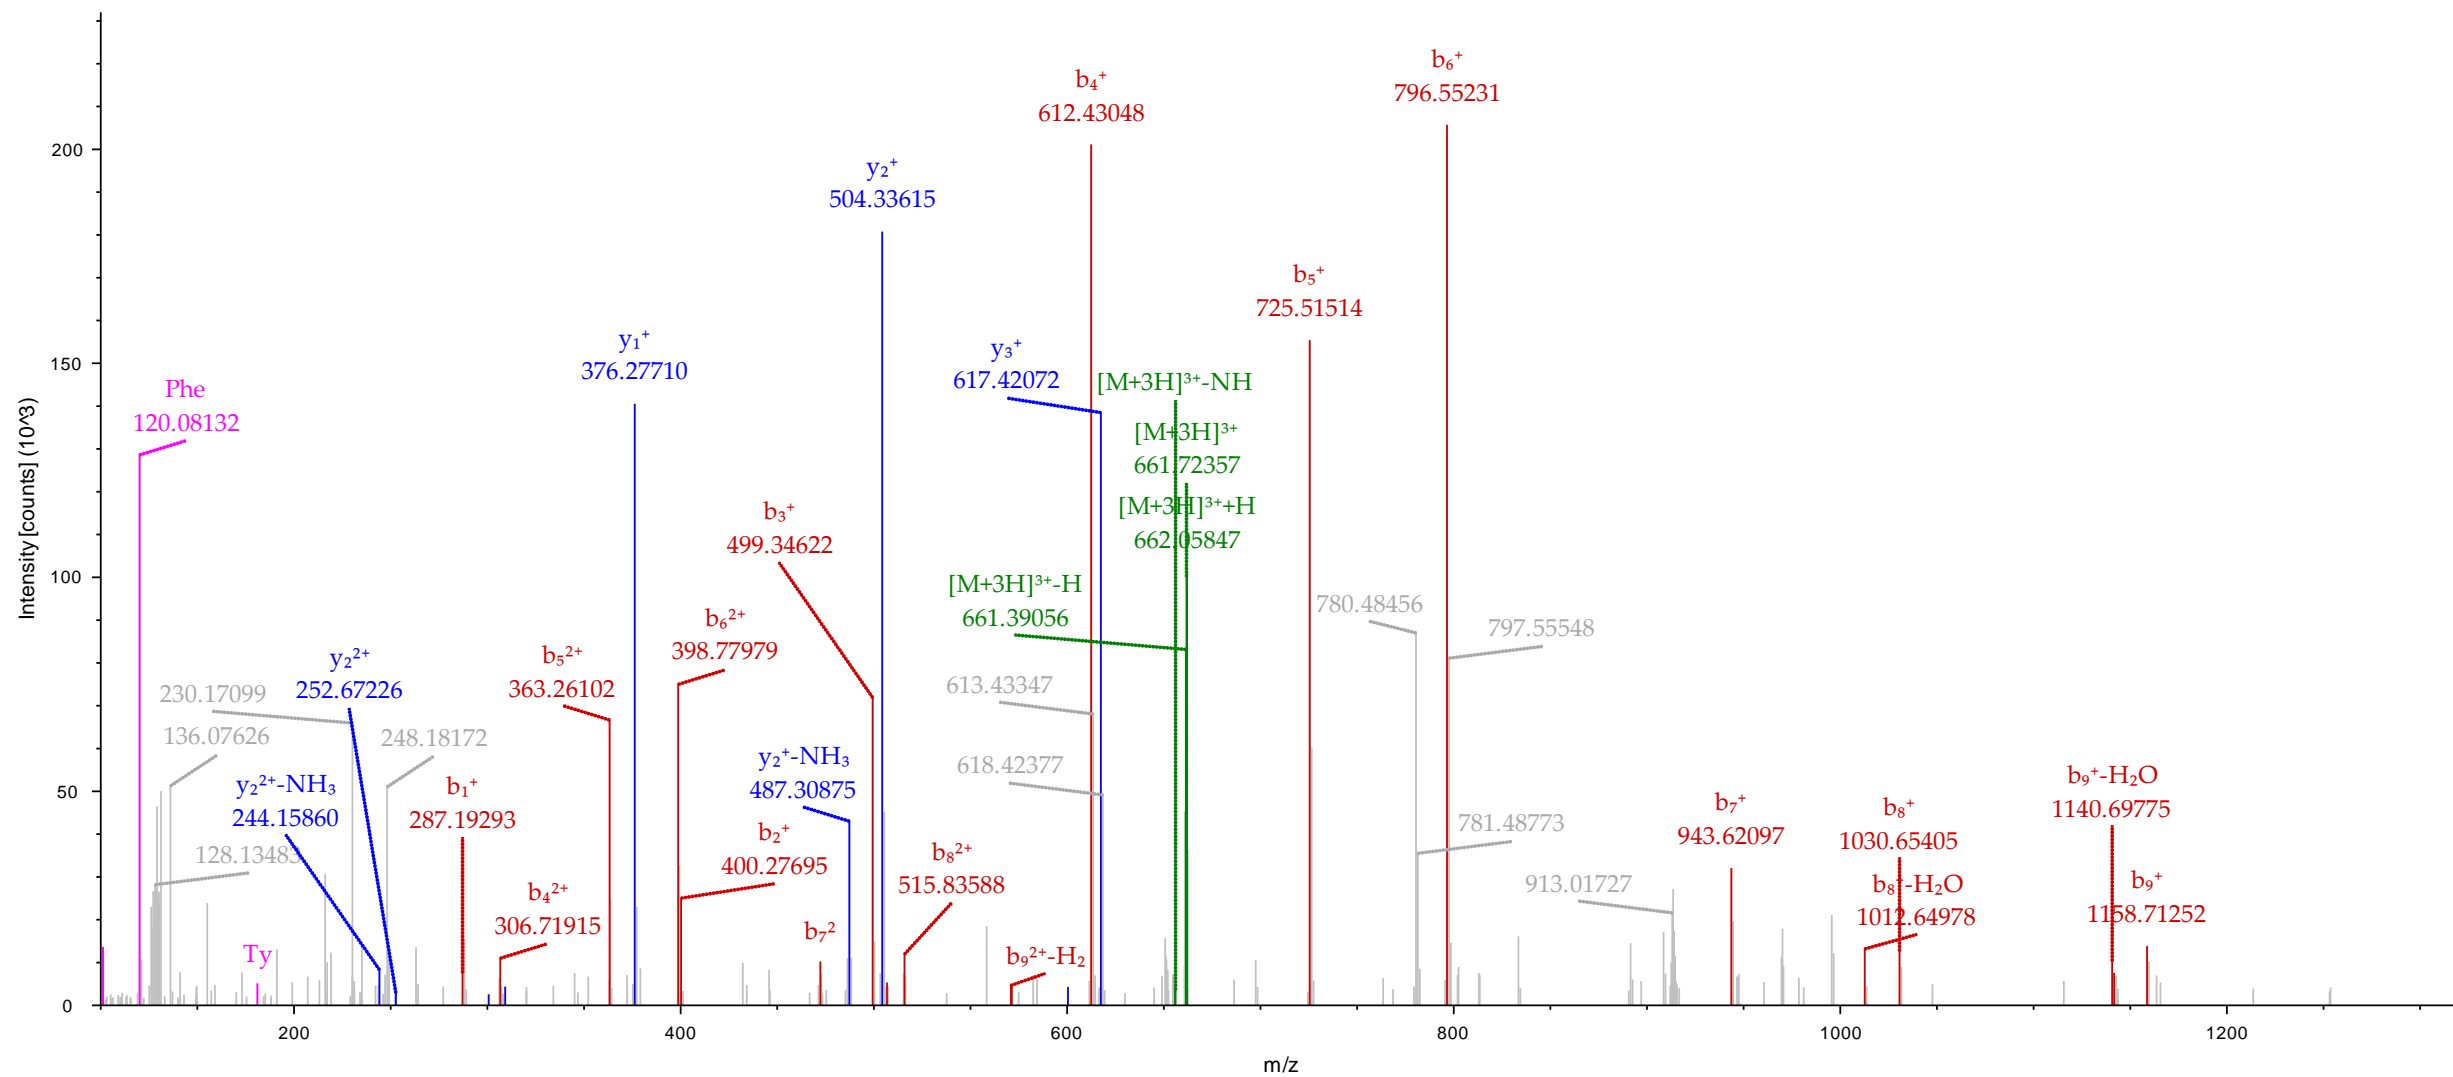

— Pre+H, Precursor, Precursor- $H_2O$ , Precursor- $H_2O-NH_3$ , Precursor- $NH_3$ , Pre-H  
— Immonium  
— y, y- $H_2O$ , y- $NH_3$   
— b, b- $H_2O$ , b- $NH_3$

| #1 | Immonium  | b <sup>+</sup> | b <sup>2+</sup> | b <sup>3+</sup> | Seq.         | y <sup>+</sup> | y <sup>2+</sup> | y <sup>3+</sup> | #2 |
|----|-----------|----------------|-----------------|-----------------|--------------|----------------|-----------------|-----------------|----|
| 1  | 315.25936 | 343.25427      | 172.13077       | 115.08961       | L-TMT6plex   |                |                 |                 | 14 |
| 2  | 70.06513  | 440.30704      | 220.65716       | 147.44053       | P            | 1594.75298     | 797.88013       | 532.25585       | 13 |
| 3  | 133.04301 | 600.33768      | 300.67248       | 200.78408       | Carbamidomet | 1497.70022     | 749.35375       | 499.90492       | 12 |
| 4  | 72.08078  | 699.40610      | 350.20669       | 233.80688       | V            | 1337.66957     | 669.33842       | 446.56137       | 11 |
| 5  | 102.05496 | 828.44869      | 414.72798       | 276.82108       | E            | 1238.60116     | 619.80422       | 413.53857       | 10 |
| 6  | 88.03930  | 943.47563      | 472.24146       | 315.16340       | D            | 1109.55856     | 555.28292       | 370.52437       | 9  |
| 7  | 181.06077 | 1151.52404     | 576.26566       | 384.51286       | Y-Nitro      | 994.53162      | 497.76945       | 332.18206       | 8  |
| 8  | 86.09643  | 1264.60811     | 632.80769       | 422.20755       | L            | 786.48321      | 393.74525       | 262.83259       | 7  |
| 9  | 60.04439  | 1351.64013     | 676.32371       | 451.21823       | S            | 673.39915      | 337.20321       | 225.13790       | 6  |
| 10 | 44.04948  | 1422.67725     | 711.84226       | 474.89727       | A            | 586.36712      | 293.68720       | 196.12722       | 5  |
| 11 | 86.09643  | 1535.76131     | 768.38429       | 512.59195       | I            | 515.33001      | 258.16864       | 172.44819       | 4  |
| 12 | 86.09643  | 1648.84538     | 824.92633       | 550.28664       | L            | 402.24594      | 201.62661       | 134.75350       | 3  |
| 13 | 87.05529  | 1762.88830     | 881.94779       | 588.30095       | N            | 289.16188      | 145.08458       | 97.05881        | 2  |
| 14 | 129.11347 |                |                 |                 | R            | 175.11895      | 88.06311        | 59.04450        | 1  |

Nitro-Tyr immonium ion is detected in MS/MS spectra and added brown colored in the following spectrum



| #1 | Immonium  | b <sup>+</sup> | b <sup>2+</sup> | b <sup>3+</sup> | b <sup>4+</sup> | Seq.              | y <sup>+</sup> | y <sup>2+</sup> | y <sup>3+</sup> | y <sup>4+</sup> | #2 |
|----|-----------|----------------|-----------------|-----------------|-----------------|-------------------|----------------|-----------------|-----------------|-----------------|----|
| 1  | 358.27640 | 386.27132      | 193.63930       | 129.42862       | 97.32329        | R-TMT6plex        |                |                 |                 |                 | 16 |
| 2  | 70.06513  | 483.32408      | 242.16568       | 161.77955       | 121.58648       | P                 | 2000.98366     | 1000.99547      | 667.66607       | 501.00137       | 15 |
| 3  | 133.04301 | 643.35473      | 322.18100       | 215.12310       | 161.59414       | C-Carbamidomethyl | 1903.93090     | 952.46909       | 635.31515       | 476.73818       | 14 |
| 4  | 120.08078 | 790.42315      | 395.71521       | 264.14590       | 198.36124       | F                 | 1743.90025     | 872.45376       | 581.97160       | 436.73052       | 13 |
| 5  | 60.04439  | 877.45517      | 439.23123       | 293.15658       | 220.11925       | S                 | 1596.83183     | 798.91955       | 532.94880       | 399.96342       | 12 |
| 6  | 44.04948  | 948.49229      | 474.74978       | 316.83561       | 237.87853       | A                 | 1509.79980     | 755.40354       | 503.93812       | 378.20541       | 11 |
| 7  | 86.09643  | 1061.57635     | 531.29181       | 354.53030       | 266.14955       | L                 | 1438.76269     | 719.88498       | 480.25908       | 360.44613       | 10 |
| 8  | 74.06004  | 1162.62403     | 581.81565       | 388.21286       | 291.41147       | T                 | 1325.67863     | 663.34295       | 442.56439       | 332.17511       | 9  |
| 9  | 72.08078  | 1261.69244     | 631.34986       | 421.23567       | 316.17857       | V                 | 1224.63095     | 612.81911       | 408.88183       | 306.91319       | 8  |
| 10 | 88.03930  | 1376.71939     | 688.86333       | 459.57798       | 344.93530       | D                 | 1125.56253     | 563.28491       | 375.85903       | 282.14609       | 7  |
| 11 | 102.05496 | 1505.76198     | 753.38463       | 502.59218       | 377.19595       | E                 | 1010.53559     | 505.77143       | 337.51672       | 253.38936       | 6  |
| 12 | 74.06004  | 1606.80966     | 803.90847       | 536.27474       | 402.45787       | T                 | 881.49300      | 441.25014       | 294.50252       | 221.12871       | 5  |
| 13 | 181.06077 | 1814.85806     | 907.93267       | 605.62421       | 454.46997       | Y-Nitro           | 780.44532      | 390.72630       | 260.81996       | 195.86679       | 4  |
| 14 | 72.08078  | 1913.92648     | 957.46688       | 638.64701       | 479.23708       | V                 | 572.39691      | 286.70210       | 191.47049       | 143.85469       | 3  |
| 15 | 70.06513  | 2010.97924     | 1005.99326      | 670.99793       | 503.50027       | P                 | 473.32850      | 237.16789       | 158.44768       | 119.08758       | 2  |
| 16 | 330.27026 |                |                 |                 |                 | K-TMT6plex        | 376.27574      | 188.64151       | 126.09676       | 94.82439        | 1  |

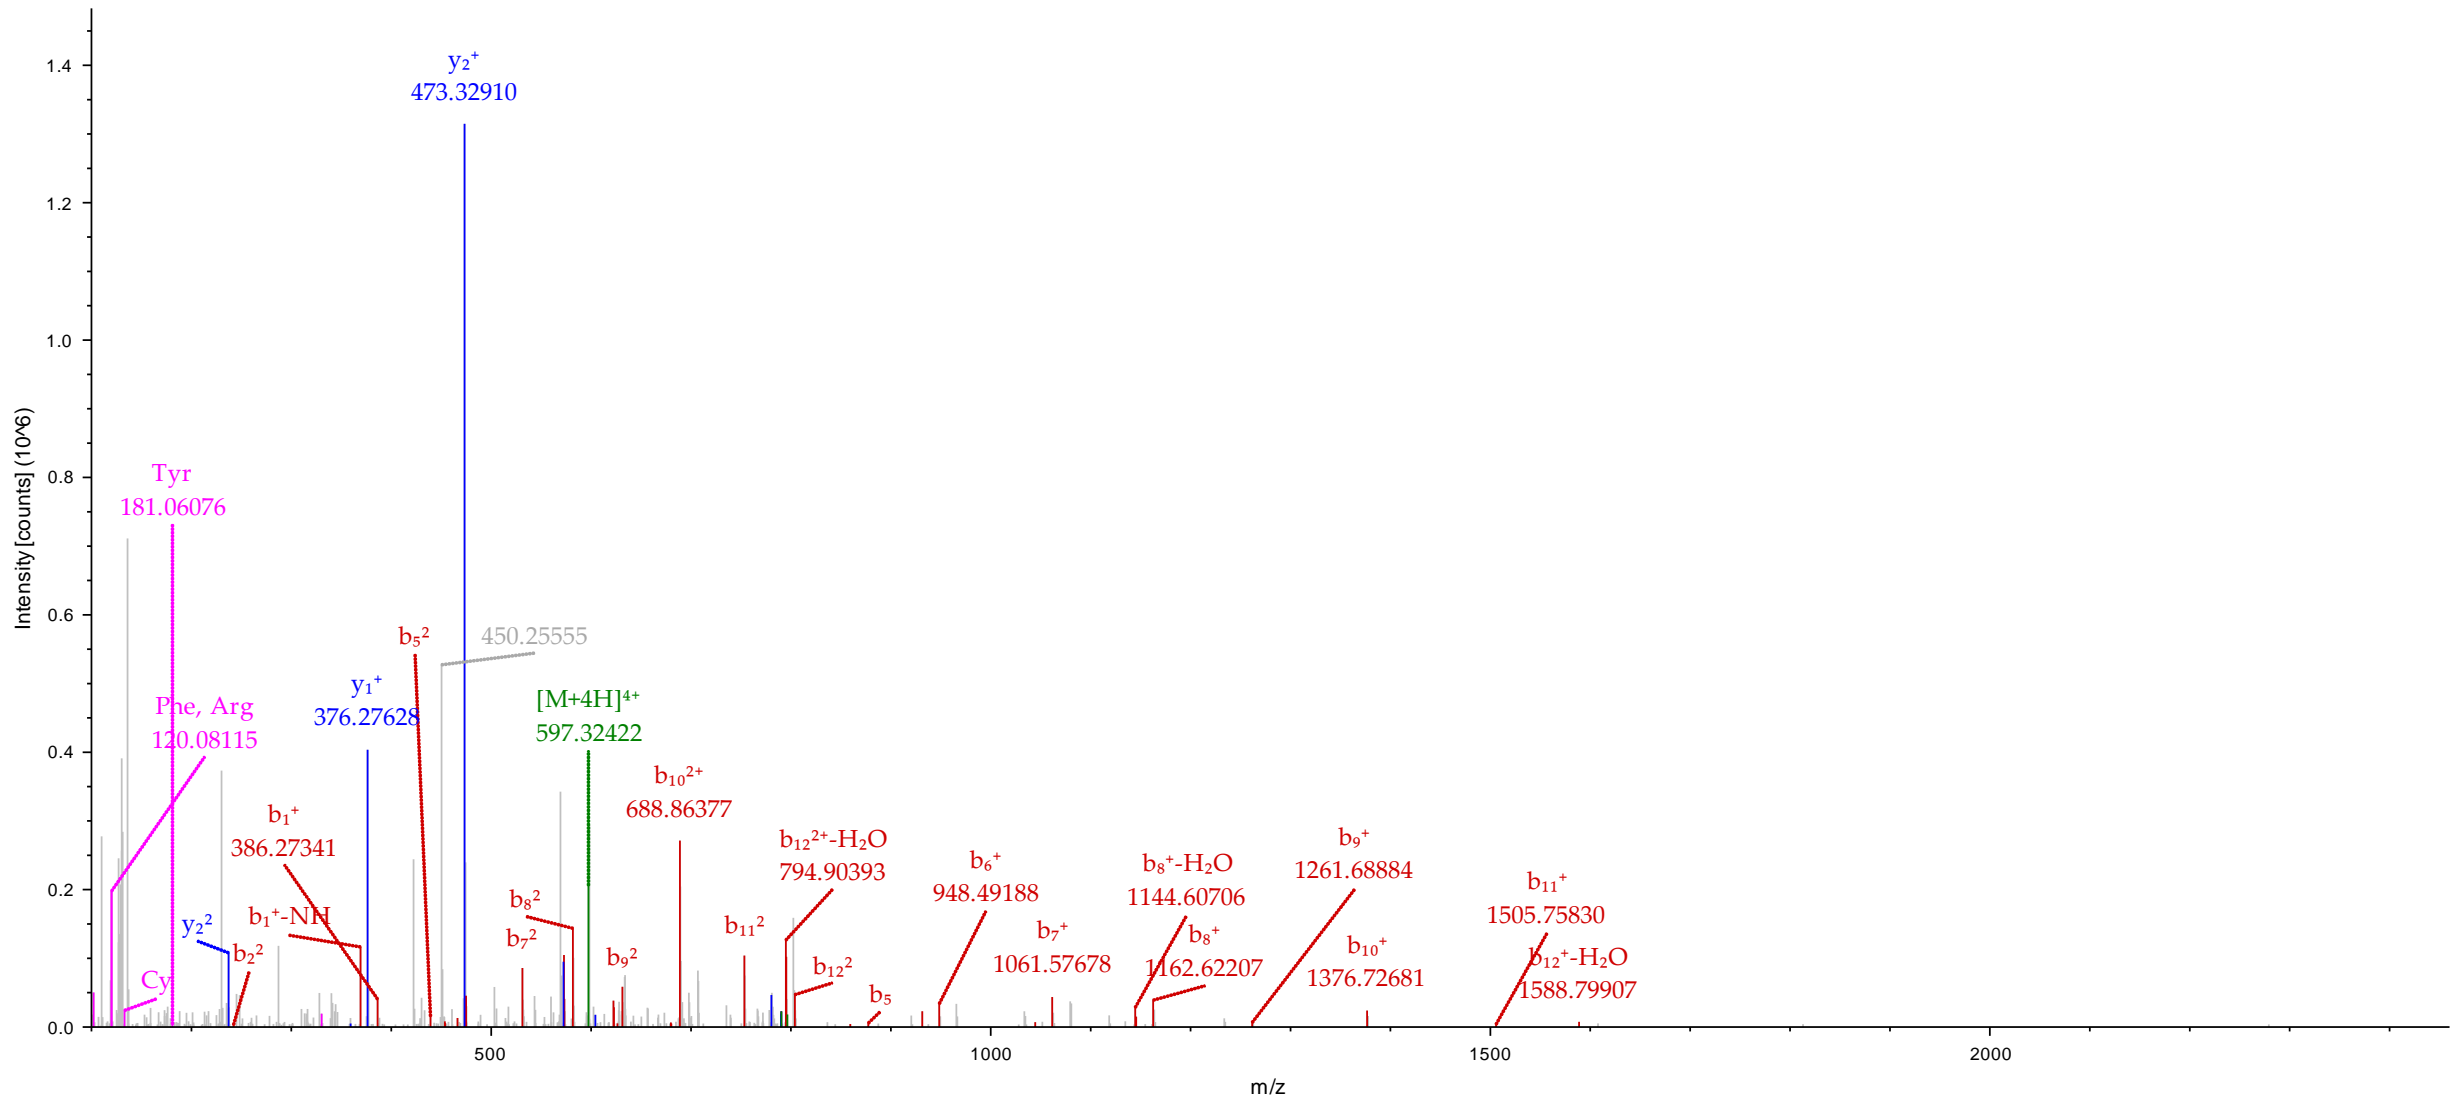

— Pre+H, Precursor, Precursor-H<sub>2</sub>O, Precursor-H<sub>2</sub>O-NH<sub>3</sub>, Precursor-NH<sub>3</sub>, Pre-H — Immonium  
— y, y-H<sub>2</sub>O, y-NH<sub>3</sub> — b, b-H<sub>2</sub>O, b-NH<sub>3</sub>



| #1 | Immonium  | b <sup>+</sup> | b <sup>2+</sup> | b <sup>3+</sup> | Seq.        | y <sup>+</sup> | y <sup>2+</sup> | y <sup>3+</sup> | #2 |
|----|-----------|----------------|-----------------|-----------------|-------------|----------------|-----------------|-----------------|----|
| 1  | 330.23387 | 358.22879      | 179.61803       | 120.08111       | Q-TMT6plex  |                |                 |                 | 23 |
| 2  | 44.04948  | 429.26590      | 215.13659       | 143.76015       | A           | 2820.23303     | 1410.62015      | 940.74919       | 22 |
| 3  | 88.03930  | 544.29284      | 272.65006       | 182.10247       | D           | 2749.19591     | 1375.10159      | 917.07016       | 21 |
| 4  | 30.03383  | 601.31431      | 301.16079       | 201.10962       | G           | 2634.16897     | 1317.58812      | 878.72784       | 20 |
| 5  | 70.06513  | 698.36707      | 349.68717       | 233.46054       | P           | 2577.14751     | 1289.07739      | 859.72069       | 19 |
| 6  | 88.03930  | 813.39401      | 407.20064       | 271.80286       | D           | 2480.09474     | 1240.55101      | 827.36977       | 18 |
| 7  | 104.05285 | 944.43450      | 472.72089       | 315.48302       | M           | 2365.06780     | 1183.03754      | 789.02745       | 17 |
| 8  | 101.07094 | 1072.49308     | 536.75018       | 358.16921       | Q           | 2234.02731     | 1117.51730      | 745.34729       | 16 |
| 9  | 60.04439  | 1159.52510     | 580.26619       | 387.17989       | S           | 2105.96874     | 1053.48801      | 702.66110       | 15 |
| 10 | 86.09643  | 1272.60917     | 636.80822       | 424.87457       | L           | 2018.93671     | 1009.97199      | 673.65042       | 14 |
| 11 | 120.08078 | 1419.67758     | 710.34243       | 473.89738       | F           | 1905.85265     | 953.42996       | 635.95573       | 13 |
| 12 | 74.06004  | 1520.72526     | 760.86627       | 507.57994       | T           | 1758.78423     | 879.89575       | 586.93293       | 12 |
| 13 | 101.07094 | 1648.78384     | 824.89556       | 550.26613       | Q           | 1657.73655     | 829.37191       | 553.25037       | 11 |
| 14 | 181.06077 | 1856.83224     | 928.91976       | 619.61560       | Y-Nitro     | 1529.67798     | 765.34263       | 510.56418       | 10 |
| 15 | 120.08078 | 2003.90066     | 1002.45397      | 668.63840       | F           | 1321.62957     | 661.31842       | 441.21471       | 9  |
| 16 | 101.07094 | 2131.95924     | 1066.48326      | 711.32460       | Q           | 1174.56116     | 587.78422       | 392.19190       | 8  |
| 17 | 60.04439  | 2218.99126     | 1109.99927      | 740.33527       | S           | 1046.50258     | 523.75493       | 349.50571       | 7  |
| 18 | 120.04776 | 2366.02666     | 1183.51697      | 789.34707       | M-Oxidation | 959.47055      | 480.23891       | 320.49503       | 6  |
| 19 | 74.06004  | 2467.07434     | 1234.04081      | 823.02963       | T           | 812.43515      | 406.72121       | 271.48323       | 5  |
| 20 | 88.03930  | 2582.10128     | 1291.55428      | 861.37195       | D           | 711.38747      | 356.19737       | 237.80067       | 4  |
| 21 | 136.07569 | 2745.16461     | 1373.08594      | 915.72639       | Y           | 596.36053      | 298.68390       | 199.45836       | 3  |
| 22 | 30.03383  | 2802.18608     | 1401.59668      | 934.73354       | G           | 433.29720      | 217.15224       | 145.10392       | 2  |
| 23 | 330.27026 |                |                 |                 | K-TMT6plex  | 376.27574      | 188.64151       | 126.09676       | 1  |

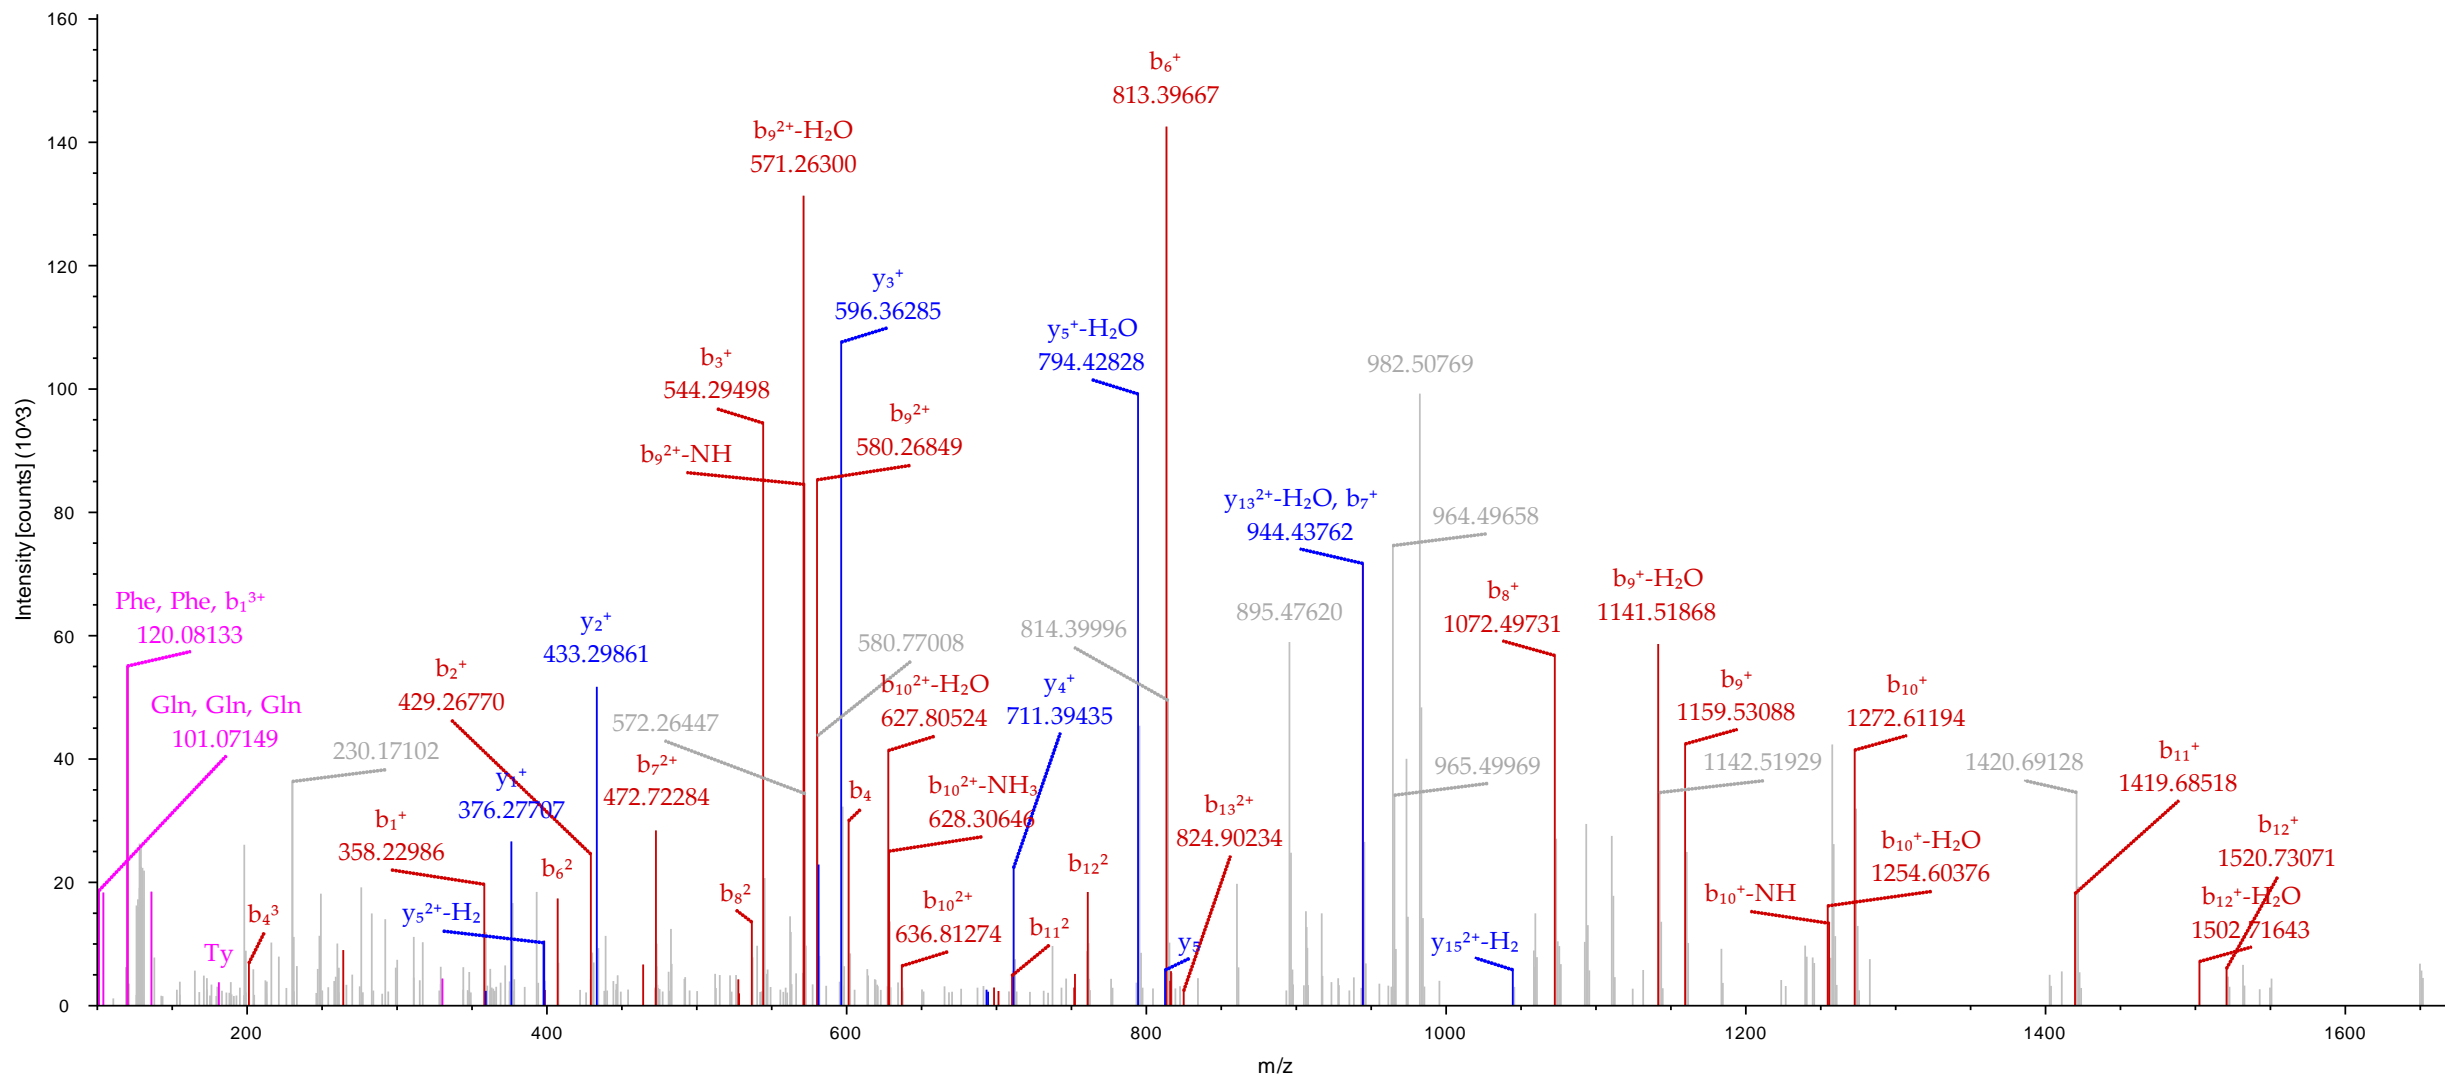

— Pre+H, Precursor, Precursor-H<sub>2</sub>O, Precursor-H<sub>2</sub>O-NH<sub>3</sub>, Precursor-NH<sub>3</sub>, Pre-H     — Immonium  
— y, y-H<sub>2</sub>O, y-NH<sub>3</sub>     — b, b-H<sub>2</sub>O, b-NH<sub>3</sub>

| #1 | Immonium  | b <sup>+</sup> | b <sup>2+</sup> | b <sup>3+</sup> | b <sup>4+</sup> | Seq.       | y <sup>+</sup> | y <sup>2+</sup> | y <sup>3+</sup> | y <sup>4+</sup> | #2 |
|----|-----------|----------------|-----------------|-----------------|-----------------|------------|----------------|-----------------|-----------------|-----------------|----|
| 1  | 273.21241 | 301.20732      | 151.10730       | 101.07396       | 76.05729        | A-TMT6plex |                |                 |                 |                 | 30 |
| 2  | 72.08078  | 400.27574      | 200.64151       | 134.09676       | 100.82439       | V          | 3085.64896     | 1543.32812      | 1029.22117      | 772.16770       | 29 |
| 3  | 86.09643  | 513.35980      | 257.18354       | 171.79145       | 129.09541       | L          | 2986.58055     | 1493.79391      | 996.19837       | 747.40059       | 28 |
| 4  | 74.06004  | 614.40748      | 307.70738       | 205.47401       | 154.35733       | T          | 2873.49649     | 1437.25188      | 958.50368       | 719.12958       | 27 |
| 5  | 86.09643  | 727.49154      | 364.24941       | 243.16870       | 182.62834       | I          | 2772.44881     | 1386.72804      | 924.82112       | 693.86766       | 26 |
| 6  | 88.03930  | 842.51849      | 421.76288       | 281.51101       | 211.38508       | D          | 2659.36474     | 1330.18601      | 887.12643       | 665.59664       | 25 |
| 7  | 102.05496 | 971.56108      | 486.28418       | 324.52521       | 243.64573       | E          | 2544.33780     | 1272.67254      | 848.78412       | 636.83991       | 24 |
| 8  | 74.06004  | 1072.60876     | 536.80802       | 358.20777       | 268.90765       | T          | 2415.29521     | 1208.15124      | 805.76992       | 604.57926       | 23 |
| 9  | 30.03383  | 1129.63022     | 565.31875       | 377.21492       | 283.16301       | G          | 2314.24753     | 1157.62740      | 772.08736       | 579.31734       | 22 |
| 10 | 74.06004  | 1230.67790     | 615.84259       | 410.89748       | 308.42493       | T          | 2257.22607     | 1129.11667      | 753.08021       | 565.06197       | 21 |
| 11 | 102.05496 | 1359.72049     | 680.36388       | 453.91168       | 340.68558       | E          | 2156.17839     | 1078.59283      | 719.39765       | 539.80005       | 20 |
| 12 | 44.04948  | 1430.75761     | 715.88244       | 477.59072       | 358.44486       | A          | 2027.13579     | 1014.07154      | 676.38345       | 507.53941       | 19 |
| 13 | 44.04948  | 1501.79472     | 751.40100       | 501.26976       | 376.20414       | A          | 1956.09868     | 978.55298       | 652.70441       | 489.78013       | 18 |
| 14 | 44.04948  | 1572.83183     | 786.91955       | 524.94880       | 393.96342       | A          | 1885.06157     | 943.03442       | 629.02537       | 472.02085       | 17 |
| 15 | 72.08078  | 1671.90025     | 836.45376       | 557.97160       | 418.73052       | V          | 1814.02445     | 907.51586       | 605.34634       | 454.26157       | 16 |
| 16 | 74.06004  | 1772.94793     | 886.97760       | 591.65416       | 443.99244       | T          | 1714.95604     | 857.98166       | 572.32353       | 429.49447       | 15 |
| 17 | 72.08078  | 1872.01634     | 936.51181       | 624.67696       | 468.75954       | V          | 1613.90836     | 807.45782       | 538.64097       | 404.23255       | 14 |
| 18 | 86.09643  | 1985.10040     | 993.05384       | 662.37165       | 497.03056       | L          | 1514.83995     | 757.92361       | 505.61817       | 379.46544       | 13 |
| 19 | 86.09643  | 2098.18447     | 1049.59587      | 700.06634       | 525.30157       | L          | 1401.75588     | 701.38158       | 467.92348       | 351.19443       | 12 |
| 20 | 44.04948  | 2169.22158     | 1085.11443      | 723.74538       | 543.06085       | A          | 1288.67182     | 644.83955       | 430.22879       | 322.92341       | 11 |
| 21 | 72.08078  | 2268.28999     | 1134.64864      | 756.76818       | 567.82796       | V          | 1217.63470     | 609.32099       | 406.54975       | 305.16413       | 10 |
| 22 | 70.06513  | 2365.34276     | 1183.17502      | 789.11910       | 592.09115       | P          | 1118.56629     | 559.78678       | 373.52695       | 280.39703       | 9  |
| 23 | 181.06077 | 2573.39117     | 1287.19922      | 858.46857       | 644.10325       | Y-Nitro    | 1021.51353     | 511.26040       | 341.17603       | 256.13384       | 8  |
| 24 | 60.04439  | 2660.42319     | 1330.71524      | 887.47925       | 665.86126       | S          | 813.46512      | 407.23620       | 271.82656       | 204.12174       | 7  |
| 25 | 104.05285 | 2791.46368     | 1396.23548      | 931.15941       | 698.62138       | M          | 726.43309      | 363.72018       | 242.81588       | 182.36373       | 6  |
| 26 | 70.06513  | 2888.51644     | 1444.76186      | 963.51033       | 722.88457       | P          | 595.39261      | 298.19994       | 199.13572       | 149.60361       | 5  |
| 27 | 70.06513  | 2985.56921     | 1493.28824      | 995.86125       | 747.14776       | P          | 498.33984      | 249.67356       | 166.78480       | 125.34042       | 4  |
| 28 | 86.09643  | 3098.65327     | 1549.83027      | 1033.55594      | 775.41877       | I          | 401.28708      | 201.14718       | 134.43388       | 101.07723       | 3  |
| 29 | 86.09643  | 3211.73733     | 1606.37231      | 1071.25063      | 803.68979       | L          | 288.20302      | 144.60515       | 96.73919        | 72.80621        | 2  |
| 30 | 129.11347 |                |                 |                 |                 | R          | 175.11895      | 88.06311        | 59.04450        | 44.53520        | 1  |

JM\_NDplasmaBVM\_TMT\_Fr4\_20171103150556.raw #104269 RT: 307.3550 min  
FTMS, 848.2007@hcd35.00, z=+4, Mono m/z=847.69952 Da, MH+=3387.77627 Da, Match Tol.=0.02 Da

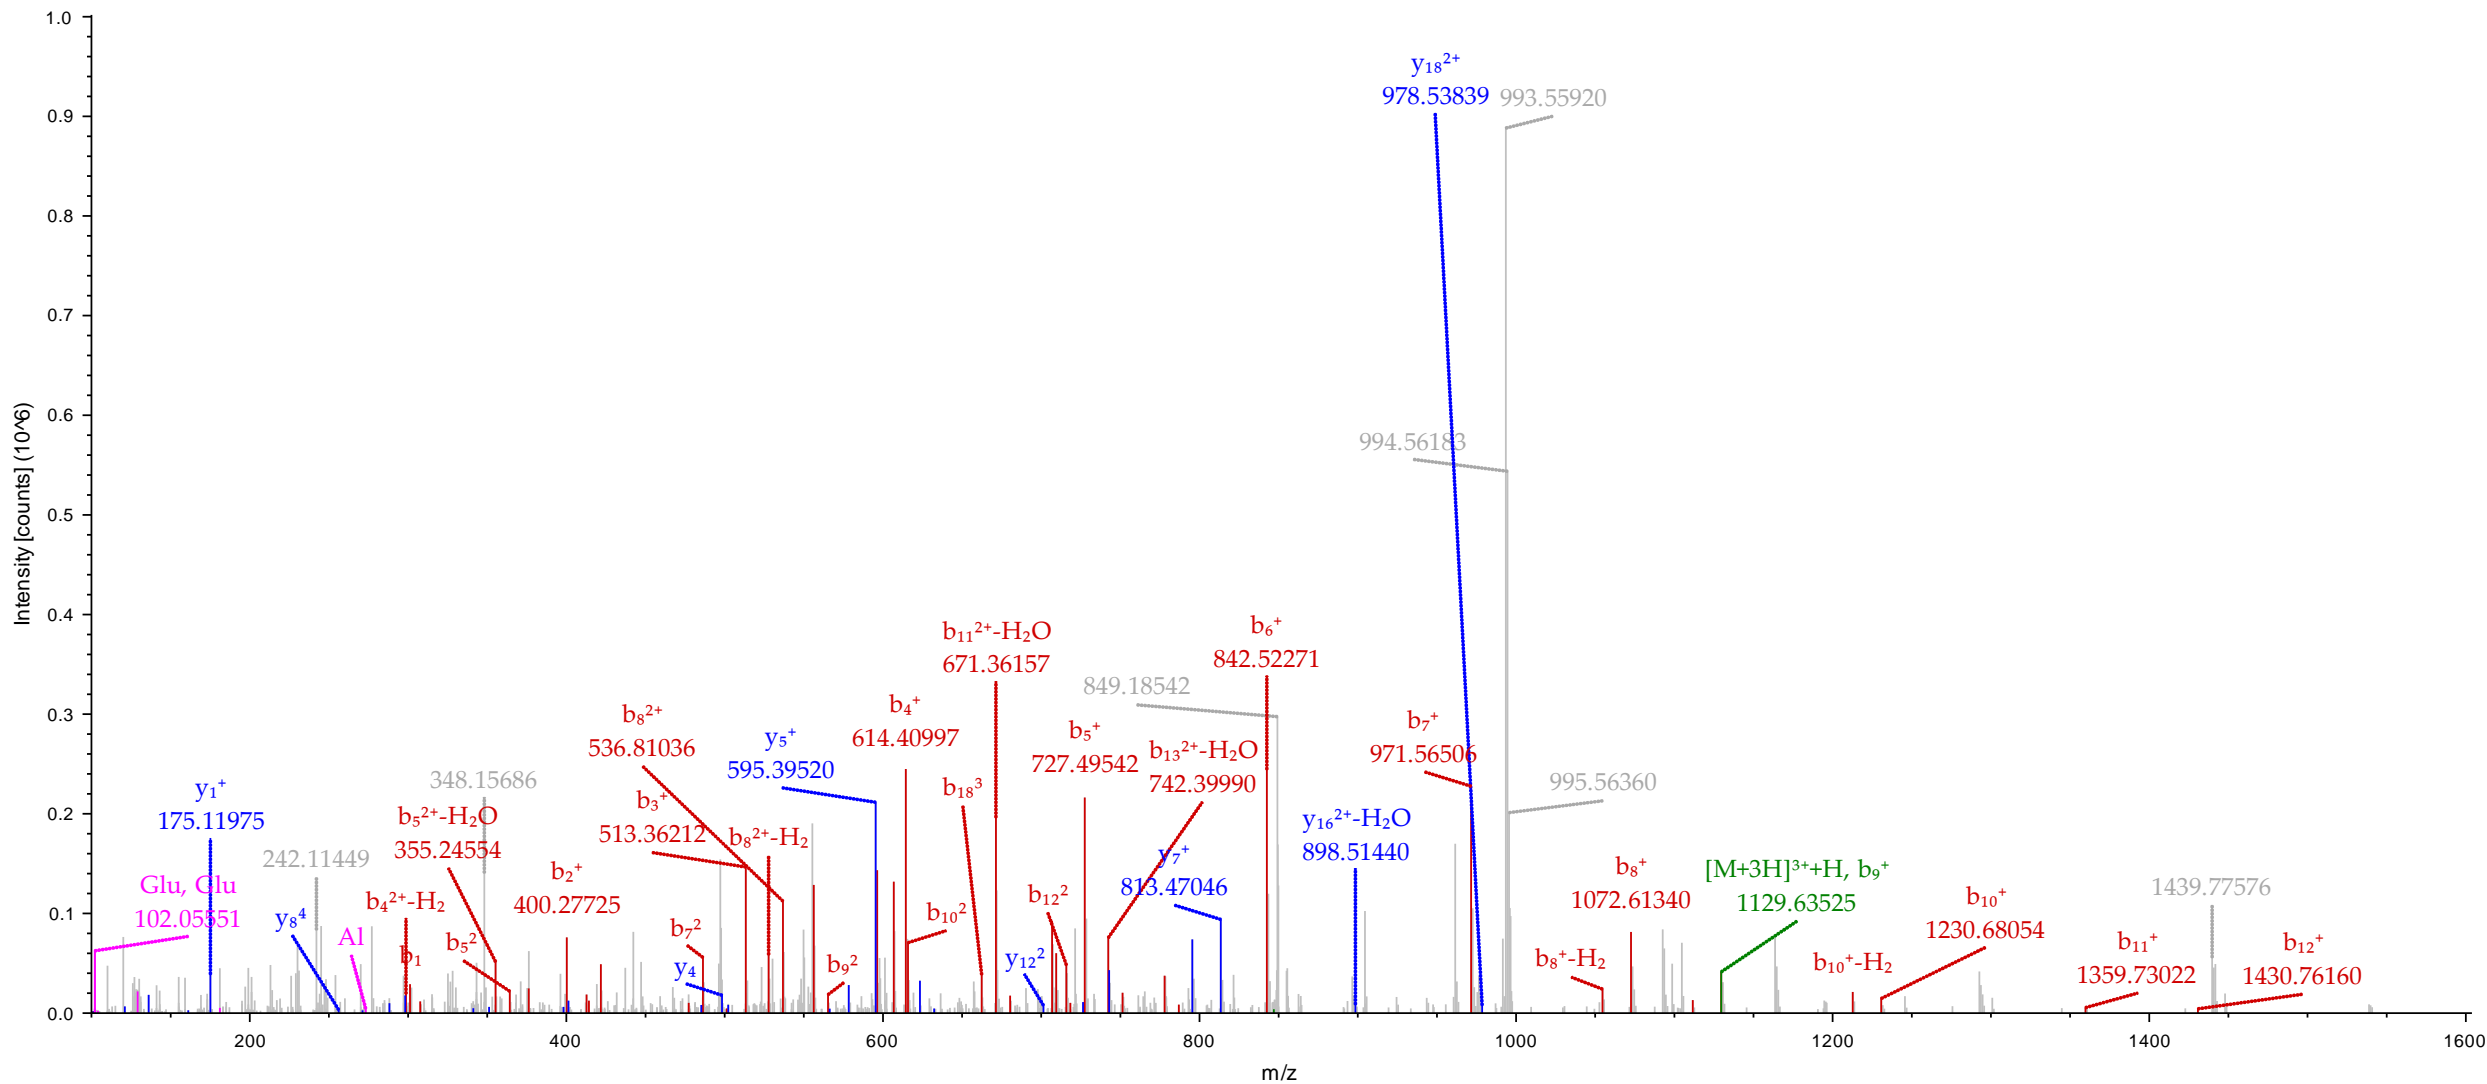

— Pre+H, Precursor, Precursor-H<sub>2</sub>O, Precursor-H<sub>2</sub>O-NH<sub>3</sub>, Precursor-NH<sub>3</sub>, Pre-H — Immonium  
— y, y-H<sub>2</sub>O, y-NH<sub>3</sub> — b, b-H<sub>2</sub>O, b-NH<sub>3</sub>

| #1 | Immonium  | b <sup>+</sup> | b <sup>2+</sup> | b <sup>3+</sup> | Seq.        | y <sup>+</sup> | y <sup>2+</sup> | y <sup>3+</sup> | #2 |
|----|-----------|----------------|-----------------|-----------------|-------------|----------------|-----------------|-----------------|----|
| 1  | 273.21241 | 301.20732      | 151.10730       | 101.07396       | A-TMT6plex  |                |                 |                 | 30 |
| 2  | 72.08078  | 400.27574      | 200.64151       | 134.09676       | V           | 3078.56636     | 1539.78682      | 1026.86030      | 29 |
| 3  | 86.09643  | 513.35980      | 257.18354       | 171.79145       | L           | 2979.49794     | 1490.25261      | 993.83750       | 28 |
| 4  | 74.06004  | 614.40748      | 307.70738       | 205.47401       | T           | 2866.41388     | 1433.71058      | 956.14281       | 27 |
| 5  | 86.09643  | 727.49154      | 364.24941       | 243.16870       | I           | 2765.36620     | 1383.18674      | 922.46025       | 26 |
| 6  | 88.03930  | 842.51849      | 421.76288       | 281.51101       | D           | 2652.28214     | 1326.64471      | 884.76556       | 25 |
| 7  | 102.05496 | 971.56108      | 486.28418       | 324.52521       | E           | 2537.25519     | 1269.13123      | 846.42325       | 24 |
| 8  | 74.06004  | 1072.60876     | 536.80802       | 358.20777       | T           | 2408.21260     | 1204.60994      | 803.40905       | 23 |
| 9  | 30.03383  | 1129.63022     | 565.31875       | 377.21492       | G           | 2307.16492     | 1154.08610      | 769.72649       | 22 |
| 10 | 74.06004  | 1230.67790     | 615.84259       | 410.89748       | T           | 2250.14346     | 1125.57537      | 750.71934       | 21 |
| 11 | 102.05496 | 1359.72049     | 680.36388       | 453.91168       | E           | 2149.09578     | 1075.05153      | 717.03678       | 20 |
| 12 | 44.04948  | 1430.75761     | 715.88244       | 477.59072       | A           | 2020.05319     | 1010.53023      | 674.02258       | 19 |
| 13 | 44.04948  | 1501.79472     | 751.40100       | 501.26976       | A           | 1949.01607     | 975.01167       | 650.34354       | 18 |
| 14 | 44.04948  | 1572.83183     | 786.91955       | 524.94880       | A           | 1877.97896     | 939.49312       | 626.66450       | 17 |
| 15 | 44.04948  | 1643.86895     | 822.43811       | 548.62783       | A           | 1806.94185     | 903.97456       | 602.98547       | 16 |
| 16 | 74.06004  | 1744.91663     | 872.96195       | 582.31039       | T           | 1735.90473     | 868.45600       | 579.30643       | 15 |
| 17 | 72.08078  | 1843.98504     | 922.49616       | 615.33320       | V           | 1634.85705     | 817.93216       | 545.62387       | 14 |
| 18 | 86.09643  | 1957.06910     | 979.03819       | 653.02789       | L           | 1535.78864     | 768.39796       | 512.60106       | 13 |
| 19 | 101.07094 | 2085.12768     | 1043.06748      | 695.71408       | Q           | 1422.70458     | 711.85593       | 474.90638       | 12 |
| 20 | 72.08078  | 2184.19609     | 1092.60169      | 728.73688       | V           | 1294.64600     | 647.82664       | 432.22018       | 11 |
| 21 | 44.04948  | 2255.23321     | 1128.12024      | 752.41592       | A           | 1195.57758     | 598.29243       | 399.19738       | 10 |
| 22 | 74.06004  | 2356.28089     | 1178.64408      | 786.09848       | T           | 1124.54047     | 562.77387       | 375.51834       | 9  |
| 23 | 181.06077 | 2564.32929     | 1282.66828      | 855.44795       | Y-Nitro     | 1023.49279     | 512.25003       | 341.83578       | 8  |
| 24 | 60.04439  | 2651.36132     | 1326.18430      | 884.45862       | S           | 815.44439      | 408.22583       | 272.48631       | 7  |
| 25 | 120.04776 | 2798.39672     | 1399.70200      | 933.47042       | M-Oxidation | 728.41236      | 364.70982       | 243.47564       | 6  |
| 26 | 70.06513  | 2895.44948     | 1448.22838      | 965.82135       | P           | 581.37696      | 291.19212       | 194.46384       | 5  |
| 27 | 70.06513  | 2992.50225     | 1496.75476      | 998.17227       | P           | 484.32419      | 242.66574       | 162.11292       | 4  |
| 28 | 86.09643  | 3105.58631     | 1553.29679      | 1035.86696      | I           | 387.27143      | 194.13935       | 129.76199       | 3  |
| 29 | 72.08078  | 3204.65473     | 1602.83100      | 1068.88976      | V           | 274.18737      | 137.59732       | 92.06731        | 2  |
| 30 | 129.11347 |                |                 |                 | R           | 175.11895      | 88.06311        | 59.04450        | 1  |

Nitro-Tyr immonium ion is detected in MS/MS spectra and added brown colored in the following spectrum

JM\_NDplasmaBVM\_TMT\_Fr4\_20171103150556.raw #99489 RT: 295.8834 min  
FTMS, 1126.2743@hcd35.00, z=+3, Mono m/z=1126.27429 Da, MH+=3376.80832 Da, Match Tol.=0.02 Da

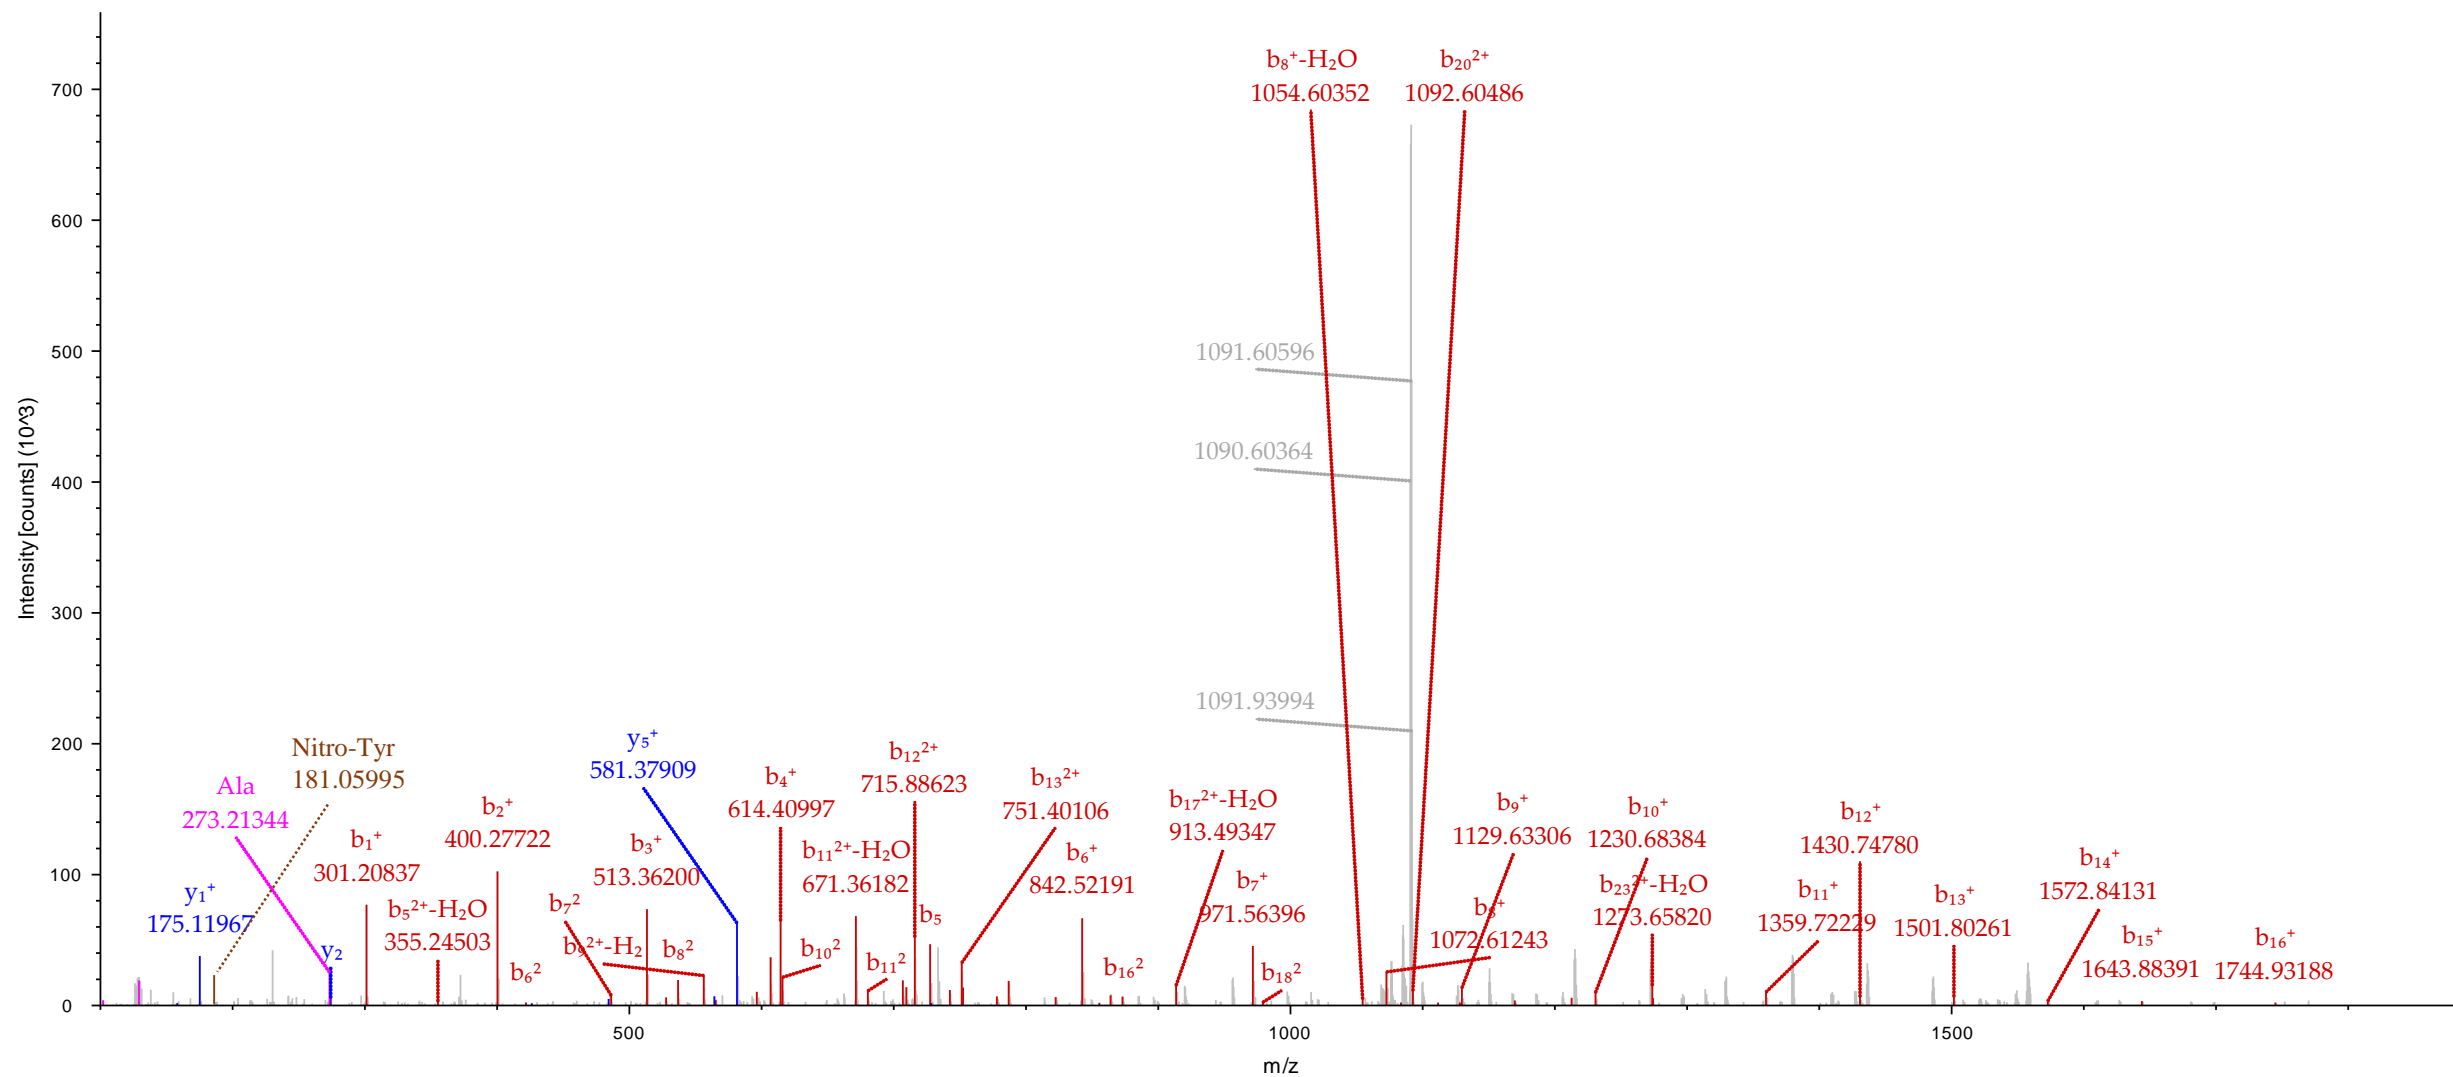

— Pre+H, Precursor, Precursor-H<sub>2</sub>O, Precursor-H<sub>2</sub>O-NH<sub>3</sub>, Precursor-NH<sub>3</sub>, Pre-H — Immonium  
— y, y-H<sub>2</sub>O, y-NH<sub>3</sub> — b, b-H<sub>2</sub>O, b-NH<sub>3</sub>

| #1 | Immonium  | b <sup>+</sup> | b <sup>2+</sup> | b <sup>3+</sup> | b <sup>4+</sup> | b <sup>5+</sup> | Seq.              | y <sup>+</sup> | y <sup>2+</sup> | y <sup>3+</sup> | y <sup>4+</sup> | y <sup>5+</sup> | #2 |
|----|-----------|----------------|-----------------|-----------------|-----------------|-----------------|-------------------|----------------|-----------------|-----------------|-----------------|-----------------|----|
| 1  | 365.23862 | 393.23354      | 197.12041       | 131.74936       | 99.06384        | 79.45253        | Y-TMT6plex        |                |                 |                 |                 |                 | 27 |
| 2  | 102.05496 | 522.27613      | 261.64170       | 174.76356       | 131.32449       | 105.26105       | E                 | 3883.96358     | 1942.48543      | 1295.32604      | 971.74635       | 777.59854       | 26 |
| 3  | 133.04301 | 682.30678      | 341.65703       | 228.10711       | 171.33215       | 137.26718       | C-Carbamidomethyl | 3754.92098     | 1877.96413      | 1252.31185      | 939.48570       | 751.79002       | 25 |
| 4  | 87.05529  | 796.34971      | 398.67849       | 266.12142       | 199.84288       | 160.07576       | N                 | 3594.89034     | 1797.94881      | 1198.96830      | 899.47804       | 719.78389       | 24 |
| 5  | 330.27026 | 1153.60760     | 577.30744       | 385.20738       | 289.15736       | 231.52734       | K-TMT6plex        | 3480.84741     | 1740.92734      | 1160.95399      | 870.96731       | 696.97530       | 23 |
| 6  | 70.06513  | 1250.66036     | 625.83382       | 417.55831       | 313.42055       | 250.93789       | P                 | 3123.58951     | 1562.29840      | 1041.86802      | 781.65284       | 625.52372       | 22 |
| 7  | 86.09643  | 1363.74443     | 682.37585       | 455.25299       | 341.69156       | 273.55471       | L                 | 3026.53675     | 1513.77201      | 1009.51710      | 757.38964       | 606.11317       | 21 |
| 8  | 102.05496 | 1492.78702     | 746.89715       | 498.26719       | 373.95221       | 299.36323       | E                 | 2913.45269     | 1457.22998      | 971.82241       | 729.11863       | 583.49636       | 20 |
| 9  | 86.09643  | 1605.87109     | 803.43918       | 535.96188       | 402.22323       | 321.98004       | L                 | 2784.41009     | 1392.70868      | 928.80822       | 696.85798       | 557.68784       | 19 |
| 10 | 120.08078 | 1752.93950     | 876.97339       | 584.98468       | 438.99033       | 351.39372       | F                 | 2671.32603     | 1336.16665      | 891.11353       | 668.58696       | 535.07103       | 18 |
| 11 | 30.03383  | 1809.96096     | 905.48412       | 603.99184       | 453.24570       | 362.79801       | G                 | 2524.25762     | 1262.63245      | 842.09072       | 631.81986       | 505.65734       | 17 |
| 12 | 101.07094 | 1938.01954     | 969.51341       | 646.67803       | 485.26034       | 388.40973       | Q                 | 2467.23615     | 1234.12171      | 823.08357       | 617.56450       | 494.25305       | 16 |
| 13 | 72.08078  | 2037.08795     | 1019.04762      | 679.70084       | 510.02745       | 408.22341       | V                 | 2339.17757     | 1170.09243      | 780.39738       | 585.54985       | 468.64134       | 15 |
| 14 | 102.05496 | 2166.13055     | 1083.56891      | 722.71503       | 542.28809       | 434.03193       | E                 | 2240.10916     | 1120.55822      | 747.37457       | 560.78275       | 448.82765       | 14 |
| 15 | 72.08078  | 2265.19896     | 1133.10312      | 755.73784       | 567.05520       | 453.84561       | V                 | 2111.06657     | 1056.03692      | 704.36037       | 528.52210       | 423.01913       | 13 |
| 16 | 120.04776 | 2412.23436     | 1206.62082      | 804.74964       | 603.81405       | 483.25269       | M-Oxidation       | 2011.99815     | 1006.50272      | 671.33757       | 503.75500       | 403.20545       | 12 |
| 17 | 133.04301 | 2572.26501     | 1286.63614      | 858.09319       | 643.82171       | 515.25882       | C-Carbamidomethyl | 1864.96275     | 932.98502       | 622.32577       | 466.99615       | 373.79837       | 11 |
| 18 | 102.05496 | 2701.30760     | 1351.15744      | 901.10739       | 676.08236       | 541.06734       | E                 | 1704.93211     | 852.96969       | 568.98222       | 426.98848       | 341.79224       | 10 |
| 19 | 87.05529  | 2815.35053     | 1408.17890      | 939.12169       | 704.59309       | 563.87593       | N                 | 1575.88951     | 788.44839       | 525.96802       | 394.72784       | 315.98372       | 9  |
| 20 | 30.03383  | 2872.37199     | 1436.68964      | 958.12885       | 718.84846       | 575.28022       | G                 | 1461.84658     | 731.42693       | 487.95371       | 366.21710       | 293.17514       | 8  |
| 21 | 86.09643  | 2985.45606     | 1493.23167      | 995.82354       | 747.11947       | 597.89703       | I                 | 1404.82512     | 702.91620       | 468.94656       | 351.96174       | 281.77085       | 7  |
| 22 | 204.07675 | 3216.52045     | 1608.76386      | 1072.84500      | 804.88557       | 644.10991       | W-Nitro           | 1291.74106     | 646.37417       | 431.25187       | 323.69072       | 259.15403       | 6  |
| 23 | 74.06004  | 3317.56813     | 1659.28770      | 1106.52756      | 830.14749       | 664.31945       | T                 | 1060.67667     | 530.84197       | 354.23041       | 265.92462       | 212.94115       | 5  |
| 24 | 102.05496 | 3446.61072     | 1723.80900      | 1149.54176      | 862.40814       | 690.12797       | E                 | 959.62899      | 480.31813       | 320.54785       | 240.66270       | 192.73162       | 4  |
| 25 | 330.27026 | 3803.86861     | 1902.43795      | 1268.62772      | 951.72261       | 761.57954       | K-TMT6plex        | 830.58640      | 415.79684       | 277.53365       | 208.40206       | 166.92310       | 3  |
| 26 | 70.06513  | 3900.92138     | 1950.96433      | 1300.97864      | 975.98580       | 780.99010       | P                 | 473.32850      | 237.16789       | 158.44768       | 119.08758       | 95.47152        | 2  |
| 27 | 330.27026 |                |                 |                 |                 |                 | K-TMT6plex        | 376.27574      | 188.64151       | 126.09676       | 94.82439        | 76.06097        | 1  |

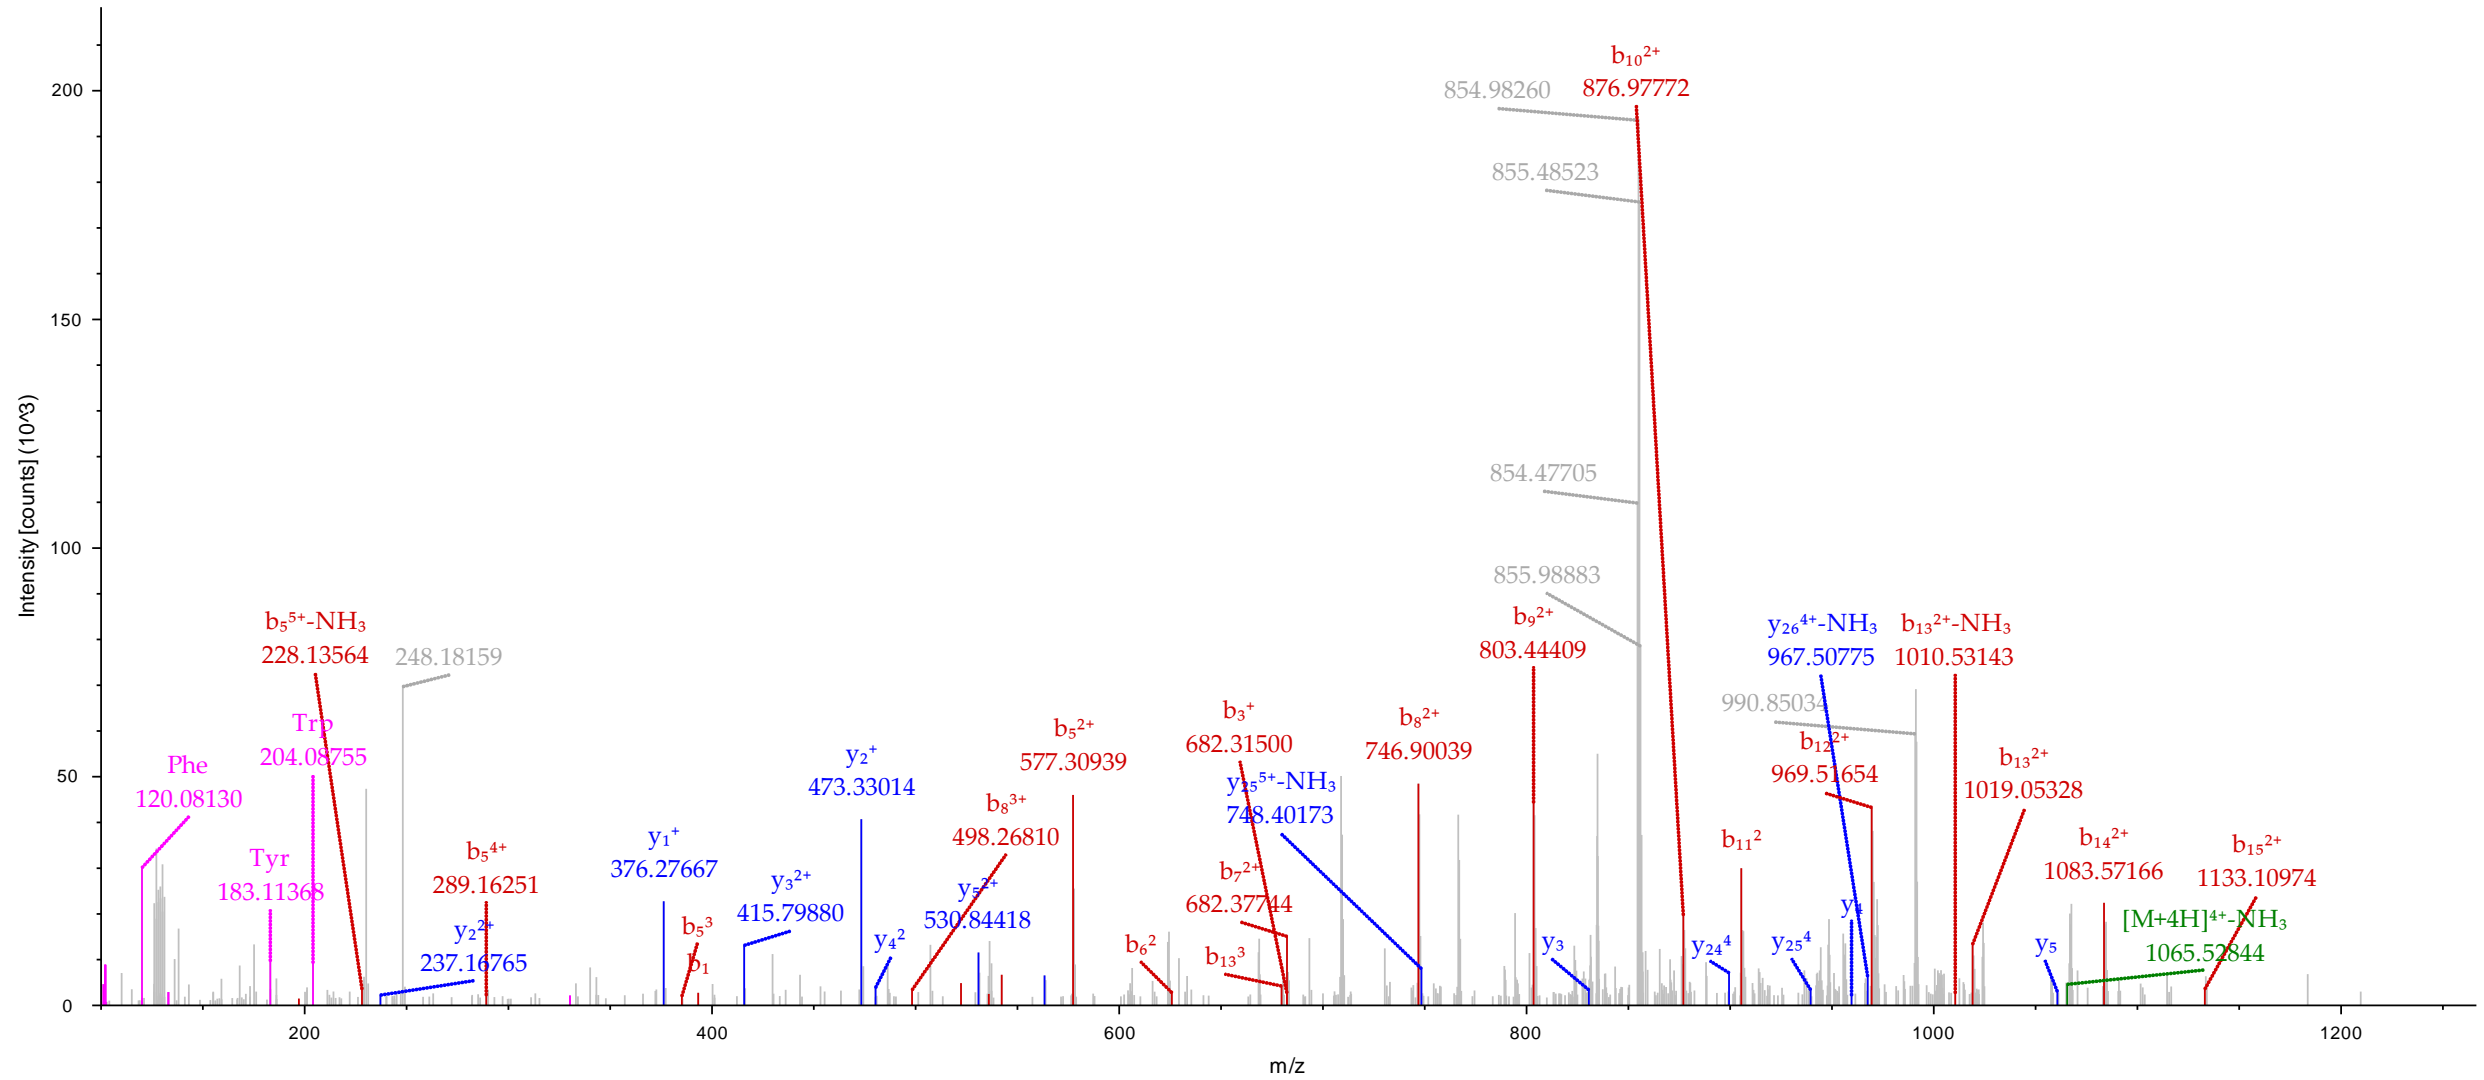

Legend:

- Green line: Pre+H, Precursor, Precursor-H<sub>2</sub>O, Precursor-H<sub>2</sub>O-NH<sub>3</sub>, Precursor-NH<sub>3</sub>, Pre-H
- Magenta line: Immonium
- Blue line: y, y-H<sub>2</sub>O, y-NH<sub>3</sub>
- Red line: b, b-H<sub>2</sub>O, b-NH<sub>3</sub>



| #1 | Immonium  | b <sup>+</sup> | b <sup>2+</sup> | b <sup>3+</sup> | b <sup>4+</sup> | b <sup>5+</sup> | Seq.          | y <sup>+</sup> | y <sup>2+</sup> | y <sup>3+</sup> | y <sup>4+</sup> | y <sup>5+</sup> | #2 |
|----|-----------|----------------|-----------------|-----------------|-----------------|-----------------|---------------|----------------|-----------------|-----------------|-----------------|-----------------|----|
| 1  | 339.23421 | 367.22912      | 184.11820       | 123.08122       | 92.56274        | 74.25165        | H-TMT6plex    |                |                 |                 |                 |                 | 35 |
| 2  | 86.09643  | 480.31318      | 240.66023       | 160.77591       | 120.83375       | 96.86846        | L             | 4120.00270     | 2060.50499      | 1374.00575      | 1030.75613      | 824.80636       | 34 |
| 3  | 86.09643  | 593.39725      | 297.20226       | 198.47060       | 149.10477       | 119.48527       | I             | 4006.91864     | 2003.96296      | 1336.31106      | 1002.48512      | 802.18955       | 33 |
| 4  | 72.08078  | 692.46566      | 346.73647       | 231.49341       | 173.87187       | 139.29895       | V             | 3893.83457     | 1947.42093      | 1298.61638      | 974.21410       | 779.57274       | 32 |
| 5  | 74.06004  | 793.51334      | 397.26031       | 265.17596       | 199.13379       | 159.50849       | T             | 3794.76616     | 1897.88672      | 1265.59357      | 949.44700       | 759.75905       | 31 |
| 6  | 70.06513  | 890.56610      | 445.78669       | 297.52689       | 223.39698       | 178.91904       | P             | 3693.71848     | 1847.36288      | 1231.91101      | 924.18508       | 739.54952       | 30 |
| 7  | 44.04948  | 961.60322      | 481.30525       | 321.20592       | 241.15626       | 193.12646       | A             | 3596.66572     | 1798.83650      | 1199.56009      | 899.92189       | 720.13897       | 29 |
| 8  | 30.03383  | 1018.62468     | 509.81598       | 340.21308       | 255.41163       | 204.53076       | G             | 3525.62861     | 1763.31794      | 1175.88105      | 882.16261       | 705.93154       | 28 |
| 9  | 133.04301 | 1178.65533     | 589.83130       | 393.55663       | 295.41929       | 236.53689       | Carbamidomett | 3468.60714     | 1734.80721      | 1156.87390      | 867.90724       | 694.52725       | 27 |
| 10 | 30.03383  | 1235.67679     | 618.34204       | 412.56378       | 309.67466       | 247.94118       | G             | 3308.57649     | 1654.79188      | 1103.53035      | 827.89958       | 662.52112       | 26 |
| 11 | 102.05496 | 1364.71939     | 682.86333       | 455.57798       | 341.93530       | 273.74970       | E             | 3251.55503     | 1626.28115      | 1084.52319      | 813.64421       | 651.11683       | 25 |
| 12 | 101.07094 | 1492.77796     | 746.89262       | 498.26417       | 373.94995       | 299.36141       | Q             | 3122.51244     | 1561.75986      | 1041.50900      | 781.38357       | 625.30831       | 24 |
| 13 | 87.05529  | 1606.82089     | 803.91408       | 536.27848       | 402.46068       | 322.17000       | N             | 2994.45386     | 1497.73057      | 998.82280       | 749.36892       | 599.69659       | 23 |
| 14 | 104.05285 | 1737.86138     | 869.43433       | 579.95864       | 435.22080       | 348.37810       | M             | 2880.41093     | 1440.70910      | 960.80849       | 720.85819       | 576.88801       | 22 |
| 15 | 86.09643  | 1850.94544     | 925.97636       | 617.65333       | 463.49182       | 370.99491       | I             | 2749.37045     | 1375.18886      | 917.12833       | 688.09807       | 550.67991       | 21 |
| 16 | 30.03383  | 1907.96690     | 954.48709       | 636.66049       | 477.74718       | 382.39920       | G             | 2636.28638     | 1318.64683      | 879.43365       | 659.82705       | 528.06310       | 20 |
| 17 | 120.04776 | 2055.00230     | 1028.00479      | 685.67229       | 514.50603       | 411.80628       | M-Oxidation   | 2579.26492     | 1290.13610      | 860.42649       | 645.57169       | 516.65881       | 19 |
| 18 | 74.06004  | 2156.04998     | 1078.52863      | 719.35485       | 539.76795       | 432.01582       | T             | 2432.22952     | 1216.61840      | 811.41469       | 608.81284       | 487.25173       | 18 |
| 19 | 70.06513  | 2253.10275     | 1127.05501      | 751.70577       | 564.03114       | 451.42637       | P             | 2331.18184     | 1166.09456      | 777.73213       | 583.55092       | 467.04219       | 17 |
| 20 | 74.06004  | 2354.15042     | 1177.57885      | 785.38833       | 589.29306       | 471.63591       | T             | 2234.12908     | 1117.56818      | 745.38121       | 559.28773       | 447.63164       | 16 |
| 21 | 72.08078  | 2453.21884     | 1227.11306      | 818.41113       | 614.06017       | 491.44959       | V             | 2133.08140     | 1067.04434      | 711.69865       | 534.02581       | 427.42210       | 15 |
| 22 | 86.09643  | 2566.30290     | 1283.65509      | 856.10582       | 642.33118       | 514.06640       | I             | 2034.01299     | 1017.51013      | 678.67585       | 509.25870       | 407.60842       | 14 |
| 23 | 44.04948  | 2637.34002     | 1319.17365      | 879.78486       | 660.09046       | 528.27382       | A             | 1920.92892     | 960.96810       | 640.98116       | 480.98769       | 384.99161       | 13 |
| 24 | 72.08078  | 2736.40843     | 1368.70785      | 912.80766       | 684.85756       | 548.08751       | V             | 1849.89181     | 925.44954       | 617.30212       | 463.22841       | 370.78418       | 12 |
| 25 | 110.07127 | 2873.46734     | 1437.23731      | 958.49396       | 719.12229       | 575.49929       | H             | 1750.82339     | 875.91534       | 584.27932       | 438.46131       | 350.97050       | 11 |
| 26 | 181.06077 | 3081.51575     | 1541.26151      | 1027.84343      | 771.13439       | 617.10897       | Y-Nitro       | 1613.76448     | 807.38588       | 538.59301       | 404.19658       | 323.55872       | 10 |
| 27 | 86.09643  | 3194.59981     | 1597.80354      | 1065.53812      | 799.40541       | 639.72578       | L             | 1405.71608     | 703.36168       | 469.24354       | 352.18448       | 281.94904       | 9  |
| 28 | 88.03930  | 3309.62675     | 1655.31702      | 1103.88044      | 828.16215       | 662.73117       | D             | 1292.63201     | 646.81964       | 431.54885       | 323.91346       | 259.33222       | 8  |
| 29 | 101.07094 | 3437.68533     | 1719.34630      | 1146.56663      | 860.17679       | 688.34289       | Q             | 1177.60507     | 589.30617       | 393.20654       | 295.15672       | 236.32683       | 7  |
| 30 | 74.06004  | 3538.73301     | 1769.87014      | 1180.24919      | 885.43871       | 708.55242       | T             | 1049.54649     | 525.27688       | 350.52035       | 263.14208       | 210.71512       | 6  |
| 31 | 102.05496 | 3667.77560     | 1834.39144      | 1223.26339      | 917.69936       | 734.36094       | E             | 948.49881      | 474.75304       | 316.83779       | 237.88016       | 190.50558       | 5  |
| 32 | 101.07094 | 3795.83418     | 1898.42073      | 1265.94958      | 949.71400       | 759.97266       | Q             | 819.45622      | 410.23175       | 273.82359       | 205.61951       | 164.69707       | 4  |
| 33 | 159.09167 | 3981.91349     | 1991.46039      | 1327.97602      | 996.23383       | 797.18852       | W             | 691.39764      | 346.20246       | 231.13740       | 173.60487       | 139.08535       | 3  |
| 34 | 102.05496 | 4110.95609     | 2055.98168      | 1370.99021      | 1028.49448      | 822.99704       | E             | 505.31833      | 253.16280       | 169.11096       | 127.08504       | 101.86949       | 2  |
| 35 | 330.27026 |                |                 |                 |                 |                 | K-TMT6plex    | 376.27574      | 188.64151       | 126.09676       | 94.82439        | 76.06097        | 1  |

JM\_NDplasmaBVM\_TMT\_Fr3.raw #66403 RT: 208.0427 min  
 FTMS, 898.0554@hcd35.00, z=+5, Mono m/z=897.85480 Da, MH+=4485.24488 Da, Match Tol.=0.02 Da

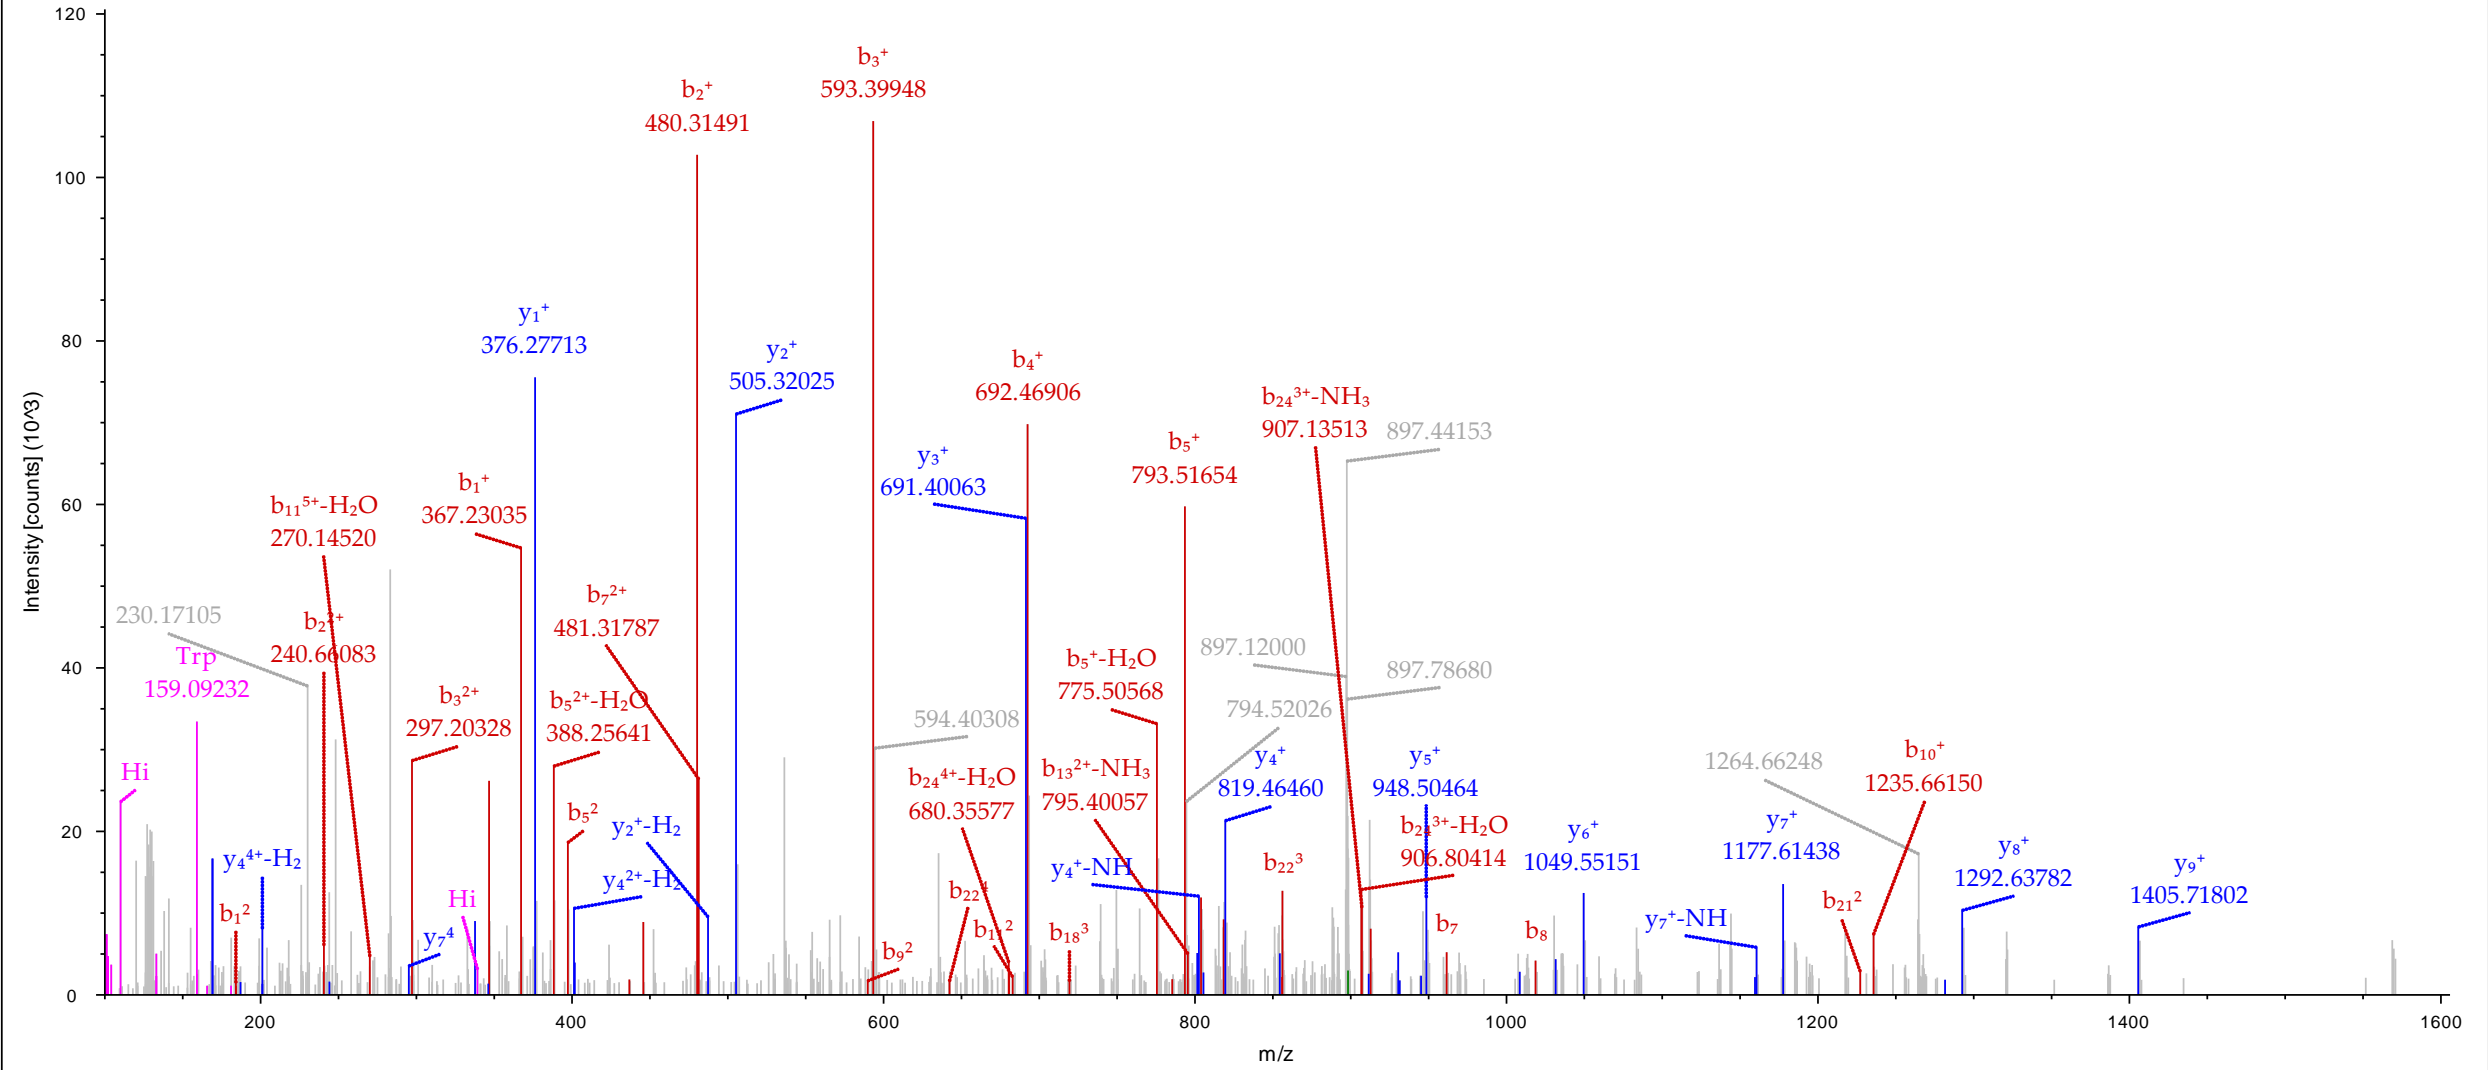

— Pre-H, Precursor, Precursor-H<sub>2</sub>O, Precursor-H<sub>2</sub>O-NH<sub>3</sub>, Precursor-NH<sub>3</sub>, Pre-H  
— Immonium  
— y, y-H<sub>2</sub>O, y-NH<sub>3</sub>  
— b, b-H<sub>2</sub>O, b-NH<sub>3</sub>

| #1 | Immonium  | b <sup>+</sup> | b <sup>2+</sup> | b <sup>3+</sup> | b <sup>4+</sup> | Seq.                | y <sup>+</sup> | y <sup>2+</sup> | y <sup>3+</sup> | y <sup>4+</sup> | #2 |
|----|-----------|----------------|-----------------|-----------------|-----------------|---------------------|----------------|-----------------|-----------------|-----------------|----|
| 1  | 559.43319 | 587.42810      | 294.21769       | 196.48089       | 147.61248       | K-TMT6plex-TMT6plex |                |                 |                 |                 | 21 |
| 2  | 30.03383  | 644.44957      | 322.72842       | 215.48804       | 161.86785       | G                   | 2559.25983     | 1280.13356      | 853.75813       | 640.57042       | 20 |
| 3  | 30.03383  | 701.47103      | 351.23915       | 234.49519       | 176.12322       | G                   | 2502.23837     | 1251.62282      | 834.75097       | 626.31505       | 19 |
| 4  | 102.05496 | 830.51362      | 415.76045       | 277.50939       | 208.38386       | E                   | 2445.21691     | 1223.11209      | 815.74382       | 612.05968       | 18 |
| 5  | 74.06004  | 931.56130      | 466.28429       | 311.19195       | 233.64578       | T                   | 2316.17431     | 1158.59079      | 772.72962       | 579.79904       | 17 |
| 6  | 60.04439  | 1018.59333     | 509.80030       | 340.20263       | 255.40379       | S                   | 2215.12663     | 1108.06696      | 739.04706       | 554.53712       | 16 |
| 7  | 102.05496 | 1147.63592     | 574.32160       | 383.21683       | 287.66444       | E                   | 2128.09461     | 1064.55094      | 710.03639       | 532.77911       | 15 |
| 8  | 104.05285 | 1278.67641     | 639.84184       | 426.89699       | 320.42456       | M                   | 1999.05201     | 1000.02964      | 667.02219       | 500.51846       | 14 |
| 9  | 181.06077 | 1486.72481     | 743.86605       | 496.24646       | 372.43666       | Y-Nitro             | 1868.01153     | 934.50940       | 623.34203       | 467.75834       | 13 |
| 10 | 86.09643  | 1599.80888     | 800.40808       | 533.94114       | 400.70768       | L                   | 1659.96312     | 830.48520       | 553.99256       | 415.74624       | 12 |
| 11 | 86.09643  | 1712.89294     | 856.95011       | 571.63583       | 428.97869       | I                   | 1546.87906     | 773.94317       | 516.29787       | 387.47522       | 11 |
| 12 | 101.07094 | 1840.95152     | 920.97940       | 614.32202       | 460.99334       | Q                   | 1433.79499     | 717.40114       | 478.60318       | 359.20421       | 10 |
| 13 | 70.06513  | 1938.00428     | 969.50578       | 646.67295       | 485.25653       | P                   | 1305.73642     | 653.37185       | 435.91699       | 327.18956       | 9  |
| 14 | 88.03930  | 2053.03123     | 1027.01925      | 685.01526       | 514.01326       | D                   | 1208.68365     | 604.84546       | 403.56607       | 302.92637       | 8  |
| 15 | 74.06004  | 2154.07891     | 1077.54309      | 718.69782       | 539.27518       | T                   | 1093.65671     | 547.33199       | 365.22375       | 274.16964       | 7  |
| 16 | 60.04439  | 2241.11093     | 1121.05911      | 747.70850       | 561.03319       | S                   | 992.60903      | 496.80815       | 331.54120       | 248.90772       | 6  |
| 17 | 86.09643  | 2354.19500     | 1177.60114      | 785.40318       | 589.30421       | I                   | 905.57700      | 453.29214       | 302.53052       | 227.14971       | 5  |
| 18 | 330.27026 | 2711.45289     | 1356.23008      | 904.48915       | 678.61868       | K-TMT6plex          | 792.49294      | 396.75011       | 264.83583       | 198.87869       | 4  |
| 19 | 70.06513  | 2808.50566     | 1404.75647      | 936.84007       | 702.88187       | P                   | 435.23504      | 218.12116       | 145.74987       | 109.56422       | 3  |
| 20 | 136.07569 | 2971.56898     | 1486.28813      | 991.19451       | 743.64770       | Y                   | 338.18228      | 169.59478       | 113.39894       | 85.30103        | 2  |
| 21 | 129.11347 |                |                 |                 |                 | R                   | 175.11895      | 88.06311        | 59.04450        | 44.53520        | 1  |

Nitro-Tyr immonium ion is detected in MS/MS spectra and added brown colored in the following spectrum

JMR\_Mouse\_Marfan\_TMT\_Fr4\_191003104527.raw #19248 RT: 77.9204 min  
 FTMS, 787.1835@hcd30.00, z=+4, Mono m/z=786.68268 Da, MH+=3143.70888 Da, Match Tol.=0.02 Da

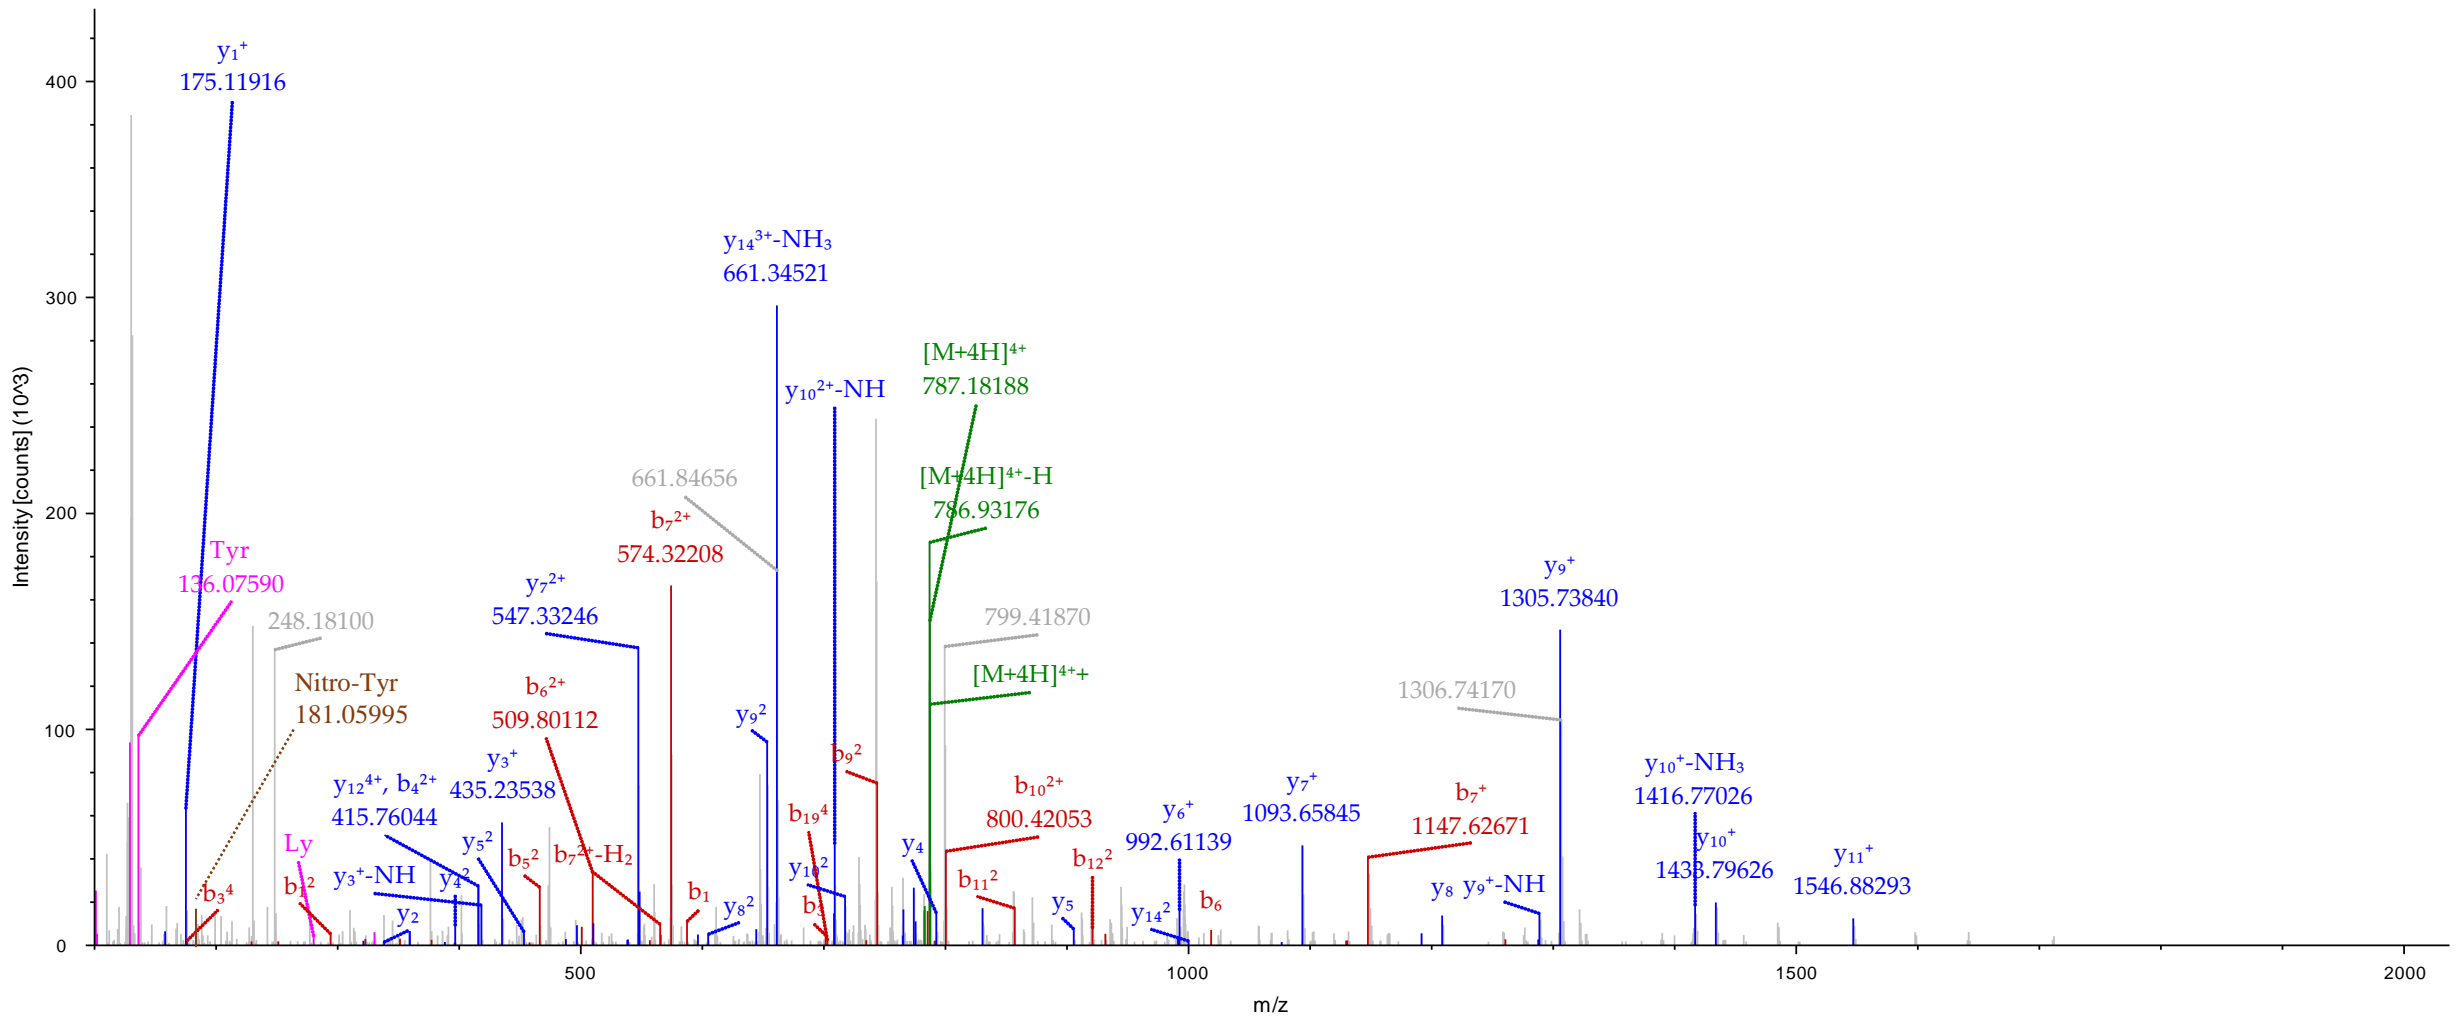

— Pre+H, Precursor, Precursor-H<sub>2</sub>O, Precursor-H<sub>2</sub>O-NH<sub>3</sub>, Precursor-NH<sub>3</sub>, Pre-H  
— y, y-H<sub>2</sub>O, y-NH<sub>3</sub>  
— Immonium  
— b, b-H<sub>2</sub>O, b-NH<sub>3</sub>

| #1 | Immonium  | b <sup>+</sup> | b <sup>2+</sup> | b <sup>3+</sup> | b <sup>4+</sup> | b <sup>5+</sup> | Seq.        | y <sup>+</sup> | y <sup>2+</sup> | y <sup>3+</sup> | y <sup>4+</sup> | y <sup>5+</sup> | #2 |
|----|-----------|----------------|-----------------|-----------------|-----------------|-----------------|-------------|----------------|-----------------|-----------------|-----------------|-----------------|----|
| 1  | 273.21241 | 301.20732      | 151.10730       | 101.07396       | 76.05729        | 61.04729        | A-TMT6plex  |                |                 |                 |                 |                 | 30 |
| 2  | 72.08078  | 400.27574      | 200.64151       | 134.09676       | 100.82439       | 80.86097        | V           | 3833.01955     | 1917.01341      | 1278.34470      | 959.01034       | 767.40973       | 29 |
| 3  | 88.03930  | 515.30268      | 258.15498       | 172.43908       | 129.58113       | 103.86636       | D           | 3733.95113     | 1867.47920      | 1245.32190      | 934.24324       | 747.59605       | 28 |
| 4  | 101.07094 | 643.36126      | 322.18427       | 215.12527       | 161.59577       | 129.47807       | Q           | 3618.92419     | 1809.96573      | 1206.97958      | 905.48650       | 724.59066       | 27 |
| 5  | 60.04439  | 730.39328      | 365.70028       | 244.13595       | 183.35378       | 146.88448       | S           | 3490.86561     | 1745.93644      | 1164.29339      | 873.47186       | 698.97894       | 26 |
| 6  | 72.08078  | 829.46170      | 415.23449       | 277.15875       | 208.12088       | 166.69816       | V           | 3403.83358     | 1702.42043      | 1135.28271      | 851.71385       | 681.57254       | 25 |
| 7  | 86.09643  | 942.54576      | 471.77652       | 314.85344       | 236.39190       | 189.31497       | L           | 3304.76517     | 1652.88622      | 1102.25991      | 826.94675       | 661.75886       | 24 |
| 8  | 86.09643  | 1055.62983     | 528.31855       | 352.54813       | 264.66291       | 211.93179       | L           | 3191.68111     | 1596.34419      | 1064.56522      | 798.67573       | 639.14204       | 23 |
| 9  | 86.09643  | 1168.71389     | 584.86058       | 390.24281       | 292.93393       | 234.54860       | L           | 3078.59704     | 1539.80216      | 1026.87053      | 770.40472       | 616.52523       | 22 |
| 10 | 330.27026 | 1525.97179     | 763.48953       | 509.32878       | 382.24840       | 306.00018       | K-TMT6plex  | 2965.51298     | 1483.26013      | 989.17584       | 742.13370       | 593.90842       | 21 |
| 11 | 70.06513  | 1623.02455     | 812.01591       | 541.67970       | 406.51159       | 325.41073       | P           | 2608.25508     | 1304.63118      | 870.08988       | 652.81923       | 522.45684       | 20 |
| 12 | 102.05496 | 1752.06714     | 876.53721       | 584.69390       | 438.77224       | 351.21925       | E           | 2511.20232     | 1256.10480      | 837.73896       | 628.55604       | 503.04629       | 19 |
| 13 | 60.04439  | 1839.09917     | 920.05322       | 613.70457       | 460.53025       | 368.62566       | S           | 2382.15973     | 1191.58350      | 794.72476       | 596.29539       | 477.23777       | 18 |
| 14 | 102.05496 | 1968.14176     | 984.57452       | 656.71877       | 492.79090       | 394.43417       | E           | 2295.12770     | 1148.06749      | 765.71408       | 574.53738       | 459.83136       | 17 |
| 15 | 86.09643  | 2081.22583     | 1041.11655      | 694.41346       | 521.06191       | 417.05099       | L           | 2166.08510     | 1083.54619      | 722.69989       | 542.27673       | 434.02284       | 16 |
| 16 | 60.04439  | 2168.25786     | 1084.63257      | 723.42414       | 542.81992       | 434.45739       | S           | 2053.00104     | 1027.00416      | 685.00520       | 514.00572       | 411.40603       | 15 |
| 17 | 70.06513  | 2265.31062     | 1133.15895      | 755.77506       | 567.08311       | 453.86795       | P           | 1965.96901     | 983.48814       | 655.99452       | 492.24771       | 393.99962       | 14 |
| 18 | 60.04439  | 2352.34265     | 1176.67496      | 784.78573       | 588.84112       | 471.27435       | S           | 1868.91625     | 934.96176       | 623.64360       | 467.98452       | 374.58907       | 13 |
| 19 | 159.09167 | 2538.42196     | 1269.71462      | 846.81217       | 635.36095       | 508.49021       | W           | 1781.88422     | 891.44575       | 594.63292       | 446.22651       | 357.18267       | 12 |
| 20 | 86.09643  | 2651.50603     | 1326.25665      | 884.50686       | 663.63196       | 531.10703       | I           | 1595.80491     | 798.40609       | 532.60649       | 399.70668       | 319.96680       | 11 |
| 21 | 181.06077 | 2859.55443     | 1430.28085      | 953.85633       | 715.64407       | 572.71671       | Y-Nitro     | 1482.72084     | 741.86406       | 494.91180       | 371.43567       | 297.34999       | 10 |
| 22 | 87.05529  | 2973.59736     | 1487.30232      | 991.87064       | 744.15480       | 595.52529       | N           | 1274.67244     | 637.83986       | 425.56233       | 319.42357       | 255.74031       | 9  |
| 23 | 86.09643  | 3086.68142     | 1543.84435      | 1029.56533      | 772.42581       | 618.14211       | L           | 1160.62951     | 580.81839       | 387.54802       | 290.91283       | 232.93172       | 8  |
| 24 | 70.06513  | 3183.73419     | 1592.37073      | 1061.91625      | 796.68900       | 637.55266       | P           | 1047.54545     | 524.27636       | 349.85333       | 262.64182       | 210.31491       | 7  |
| 25 | 30.03383  | 3240.75565     | 1620.88146      | 1080.92340      | 810.94437       | 648.95695       | G           | 950.49268      | 475.74998       | 317.50241       | 238.37863       | 190.90436       | 6  |
| 26 | 120.04776 | 3387.79105     | 1694.39916      | 1129.93520      | 847.70322       | 678.36403       | M-Oxidation | 893.47122      | 447.23925       | 298.49526       | 224.12326       | 179.50006       | 5  |
| 27 | 101.07094 | 3515.84963     | 1758.42845      | 1172.62139      | 879.71786       | 703.97575       | Q           | 746.43582      | 373.72155       | 249.48346       | 187.36441       | 150.09299       | 4  |
| 28 | 101.07094 | 3643.90820     | 1822.45774      | 1215.30759      | 911.73251       | 729.58746       | Q           | 618.37724      | 309.69226       | 206.79726       | 155.34977       | 124.48127       | 3  |
| 29 | 87.05529  | 3757.95113     | 1879.47920      | 1253.32190      | 940.24324       | 752.39605       | N           | 490.31866      | 245.66297       | 164.11107       | 123.33512       | 98.86955        | 2  |
| 30 | 330.27026 |                |                 |                 |                 |                 | K-TMT6plex  | 376.27574      | 188.64151       | 126.09676       | 94.82439        | 76.06097        | 1  |



| #1 | Immonium  | b <sup>+</sup> | b <sup>2+</sup> | b <sup>3+</sup> | b <sup>4+</sup> | Seq.       | y <sup>+</sup> | y <sup>2+</sup> | y <sup>3+</sup> | y <sup>4+</sup> | #2 |
|----|-----------|----------------|-----------------|-----------------|-----------------|------------|----------------|-----------------|-----------------|-----------------|----|
| 1  | 273.21241 | 301.20732      | 151.10730       | 101.07396       | 76.05729        | A-TMT6plex |                |                 |                 |                 | 30 |
| 2  | 72.08078  | 400.27574      | 200.64151       | 134.09676       | 100.82439       | V          | 3817.02463     | 1909.01595      | 1273.01306      | 955.01162       | 29 |
| 3  | 88.03930  | 515.30268      | 258.15498       | 172.43908       | 129.58113       | D          | 3717.95622     | 1859.48175      | 1239.99026      | 930.24451       | 28 |
| 4  | 101.07094 | 643.36126      | 322.18427       | 215.12527       | 161.59577       | Q          | 3602.92927     | 1801.96828      | 1201.64794      | 901.48778       | 27 |
| 5  | 60.04439  | 730.39328      | 365.70028       | 244.13595       | 183.35378       | S          | 3474.87070     | 1737.93899      | 1158.96175      | 869.47313       | 26 |
| 6  | 72.08078  | 829.46170      | 415.23449       | 277.15875       | 208.12088       | V          | 3387.83867     | 1694.42297      | 1129.95107      | 847.71512       | 25 |
| 7  | 86.09643  | 942.54576      | 471.77652       | 314.85344       | 236.39190       | L          | 3288.77025     | 1644.88877      | 1096.92827      | 822.94802       | 24 |
| 8  | 86.09643  | 1055.62983     | 528.31855       | 352.54813       | 264.66291       | L          | 3175.68619     | 1588.34673      | 1059.23358      | 794.67701       | 23 |
| 9  | 86.09643  | 1168.71389     | 584.86058       | 390.24281       | 292.93393       | L          | 3062.60213     | 1531.80470      | 1021.53889      | 766.40599       | 22 |
| 10 | 330.27026 | 1525.97179     | 763.48953       | 509.32878       | 382.24840       | K-TMT6plex | 2949.51806     | 1475.26267      | 983.84421       | 738.13497       | 21 |
| 11 | 70.06513  | 1623.02455     | 812.01591       | 541.67970       | 406.51159       | P          | 2592.26017     | 1296.63372      | 864.75824       | 648.82050       | 20 |
| 12 | 102.05496 | 1752.06714     | 876.53721       | 584.69390       | 438.77224       | E          | 2495.20740     | 1248.10734      | 832.40732       | 624.55731       | 19 |
| 13 | 60.04439  | 1839.09917     | 920.05322       | 613.70457       | 460.53025       | S          | 2366.16481     | 1183.58604      | 789.39312       | 592.29666       | 18 |
| 14 | 102.05496 | 1968.14176     | 984.57452       | 656.71877       | 492.79090       | E          | 2279.13278     | 1140.07003      | 760.38245       | 570.53865       | 17 |
| 15 | 86.09643  | 2081.22583     | 1041.11655      | 694.41346       | 521.06191       | L          | 2150.09019     | 1075.54873      | 717.36825       | 538.27800       | 16 |
| 16 | 60.04439  | 2168.25786     | 1084.63257      | 723.42414       | 542.81992       | S          | 2037.00613     | 1019.00670      | 679.67356       | 510.00699       | 15 |
| 17 | 70.06513  | 2265.31062     | 1133.15895      | 755.77506       | 567.08311       | P          | 1949.97410     | 975.49069       | 650.66288       | 488.24898       | 14 |
| 18 | 60.04439  | 2352.34265     | 1176.67496      | 784.78573       | 588.84112       | S          | 1852.92133     | 926.96431       | 618.31196       | 463.98579       | 13 |
| 19 | 204.07675 | 2583.40704     | 1292.20716      | 861.80720       | 646.60722       | W-Nitro    | 1765.88931     | 883.44829       | 589.30129       | 442.22778       | 12 |
| 20 | 86.09643  | 2696.49110     | 1348.74919      | 899.50189       | 674.87823       | I          | 1534.82491     | 767.91610       | 512.27982       | 384.46169       | 11 |
| 21 | 136.07569 | 2859.55443     | 1430.28085      | 953.85633       | 715.64407       | Y          | 1421.74085     | 711.37406       | 474.58513       | 356.19067       | 10 |
| 22 | 87.05529  | 2973.59736     | 1487.30232      | 991.87064       | 744.15480       | N          | 1258.67752     | 629.84240       | 420.23069       | 315.42484       | 9  |
| 23 | 86.09643  | 3086.68142     | 1543.84435      | 1029.56533      | 772.42581       | L          | 1144.63459     | 572.82094       | 382.21638       | 286.91411       | 8  |
| 24 | 70.06513  | 3183.73419     | 1592.37073      | 1061.91625      | 796.68900       | P          | 1031.55053     | 516.27890       | 344.52169       | 258.64309       | 7  |
| 25 | 30.03383  | 3240.75565     | 1620.88146      | 1080.92340      | 810.94437       | G          | 934.49777      | 467.75252       | 312.17077       | 234.37990       | 6  |
| 26 | 104.05285 | 3371.79613     | 1686.40171      | 1124.60356      | 843.70449       | M          | 877.47630      | 439.24179       | 293.16362       | 220.12453       | 5  |
| 27 | 101.07094 | 3499.85471     | 1750.43099      | 1167.28976      | 875.71914       | Q          | 746.43582      | 373.72155       | 249.48346       | 187.36441       | 4  |
| 28 | 101.07094 | 3627.91329     | 1814.46028      | 1209.97595      | 907.73378       | Q          | 618.37724      | 309.69226       | 206.79726       | 155.34977       | 3  |
| 29 | 87.05529  | 3741.95622     | 1871.48175      | 1247.99026      | 936.24451       | N          | 490.31866      | 245.66297       | 164.11107       | 123.33512       | 2  |
| 30 | 330.27026 |                |                 |                 |                 | K-TMT6plex | 376.27574      | 188.64151       | 126.09676       | 94.82439        | 1  |





| #1 | Immonium  | b <sup>+</sup> | b <sup>2+</sup> | b <sup>3+</sup> | b <sup>4+</sup> | Seq.        | y <sup>+</sup> | y <sup>2+</sup> | y <sup>3+</sup> | y <sup>4+</sup> | #2 |
|----|-----------|----------------|-----------------|-----------------|-----------------|-------------|----------------|-----------------|-----------------|-----------------|----|
| 1  | 259.19676 | 287.19167      | 144.09947       | 96.40208        | 72.55338        | G-TMT6plex  |                |                 |                 |                 | 31 |
| 2  | 30.03383  | 344.21314      | 172.61021       | 115.40923       | 86.80874        | G           | 3465.73305     | 1733.37016      | 1155.91587      | 867.18872       | 30 |
| 3  | 72.08078  | 443.28155      | 222.14441       | 148.43203       | 111.57584       | V           | 3408.71159     | 1704.85943      | 1136.90871      | 852.93335       | 29 |
| 4  | 88.03930  | 558.30849      | 279.65788       | 186.77435       | 140.33258       | D           | 3309.64318     | 1655.32523      | 1103.88591      | 828.16625       | 28 |
| 5  | 88.03930  | 673.33544      | 337.17136       | 225.11666       | 169.08932       | D           | 3194.61623     | 1597.81175      | 1065.54360      | 799.40952       | 27 |
| 6  | 102.05496 | 802.37803      | 401.69265       | 268.13086       | 201.34996       | E           | 3079.58929     | 1540.29828      | 1027.20128      | 770.65278       | 26 |
| 7  | 104.05285 | 933.41851      | 467.21289       | 311.81102       | 234.11009       | M           | 2950.54670     | 1475.77699      | 984.18708       | 738.39213       | 25 |
| 8  | 74.06004  | 1034.46619     | 517.73673       | 345.49358       | 259.37201       | T           | 2819.50621     | 1410.25674      | 940.50692       | 705.63201       | 24 |
| 9  | 86.09643  | 1147.55026     | 574.27877       | 383.18827       | 287.64302       | L           | 2718.45853     | 1359.73291      | 906.82436       | 680.37009       | 23 |
| 10 | 60.04439  | 1234.58228     | 617.79478       | 412.19895       | 309.40103       | S           | 2605.37447     | 1303.19087      | 869.12967       | 652.09907       | 22 |
| 11 | 44.04948  | 1305.61940     | 653.31334       | 435.87798       | 327.16031       | A           | 2518.34244     | 1259.67486      | 840.11900       | 630.34107       | 21 |
| 12 | 181.06077 | 1513.66780     | 757.33754       | 505.22745       | 379.17241       | Y-Nitro     | 2447.30533     | 1224.15630      | 816.43996       | 612.58179       | 20 |
| 13 | 86.09643  | 1626.75187     | 813.87957       | 542.92214       | 407.44342       | I           | 2239.25692     | 1120.13210      | 747.09049       | 560.56969       | 19 |
| 14 | 74.06004  | 1727.79955     | 864.40341       | 576.60470       | 432.70534       | T           | 2126.17286     | 1063.59007      | 709.39580       | 532.29867       | 18 |
| 15 | 120.04776 | 1874.83495     | 937.92111       | 625.61650       | 469.46419       | M-Oxidation | 2025.12518     | 1013.06623      | 675.71324       | 507.03675       | 17 |
| 16 | 44.04948  | 1945.87206     | 973.43967       | 649.29554       | 487.22347       | A           | 1878.08978     | 939.54853       | 626.70144       | 470.27790       | 16 |
| 17 | 86.09643  | 2058.95612     | 1029.98170      | 686.99023       | 515.49449       | L           | 1807.05267     | 904.02997       | 603.02241       | 452.51862       | 15 |
| 18 | 86.09643  | 2172.04019     | 1086.52373      | 724.68491       | 543.76550       | L           | 1693.96860     | 847.48794       | 565.32772       | 424.24761       | 14 |
| 19 | 102.05496 | 2301.08278     | 1151.04503      | 767.69911       | 576.02615       | E           | 1580.88454     | 790.94591       | 527.63303       | 395.97659       | 13 |
| 20 | 60.04439  | 2388.11481     | 1194.56104      | 796.70979       | 597.78416       | S           | 1451.84194     | 726.42461       | 484.61883       | 363.71594       | 12 |
| 21 | 60.04439  | 2475.14684     | 1238.07706      | 825.72046       | 619.54217       | S           | 1364.80992     | 682.90860       | 455.60816       | 341.95794       | 11 |
| 22 | 86.09643  | 2588.23090     | 1294.61909      | 863.41515       | 647.81318       | L           | 1277.77789     | 639.39258       | 426.59748       | 320.19993       | 10 |
| 23 | 70.06513  | 2685.28367     | 1343.14547      | 895.76607       | 672.07637       | P           | 1164.69382     | 582.85055       | 388.90279       | 291.92891       | 9  |
| 24 | 44.04948  | 2756.32078     | 1378.66403      | 919.44511       | 689.83565       | A           | 1067.64106     | 534.32417       | 356.55187       | 267.66572       | 8  |
| 25 | 74.06004  | 2857.36846     | 1429.18787      | 953.12767       | 715.09757       | T           | 996.60395      | 498.80561       | 332.87283       | 249.90644       | 7  |
| 26 | 110.07127 | 2994.42737     | 1497.71732      | 998.81397       | 749.36230       | H           | 895.55627      | 448.28177       | 299.19027       | 224.64452       | 6  |
| 27 | 70.06513  | 3091.48013     | 1546.24370      | 1031.16490      | 773.62549       | P           | 758.49736      | 379.75232       | 253.50397       | 190.37980       | 5  |
| 28 | 72.08078  | 3190.54855     | 1595.77791      | 1064.18770      | 798.39259       | V           | 661.44459      | 331.22593       | 221.15305       | 166.11661       | 4  |
| 29 | 72.08078  | 3289.61696     | 1645.31212      | 1097.21050      | 823.15970       | V           | 562.37618      | 281.69173       | 188.13024       | 141.34950       | 3  |
| 30 | 60.04439  | 3376.64899     | 1688.82813      | 1126.22118      | 844.91770       | S           | 463.30776      | 232.15752       | 155.10744       | 116.58240       | 2  |
| 31 | 330.27026 |                |                 |                 |                 | K-TMT6plex  | 376.27574      | 188.64151       | 126.09676       | 94.82439        | 1  |

Nitro-Tyr immonium ion is detected in MS/MS spectra and added brown colored in the following spectrum

JM\_NDplasmaBVM\_TMT\_Fr4\_20171103150556.raw #101715 RT: 301.3420 min  
 FTMS, 938.2454@hcd35.00, z=+4, Mono m/z=938.24536 Da, MH+=3749.95962 Da, Match Tol.=0.02 Da

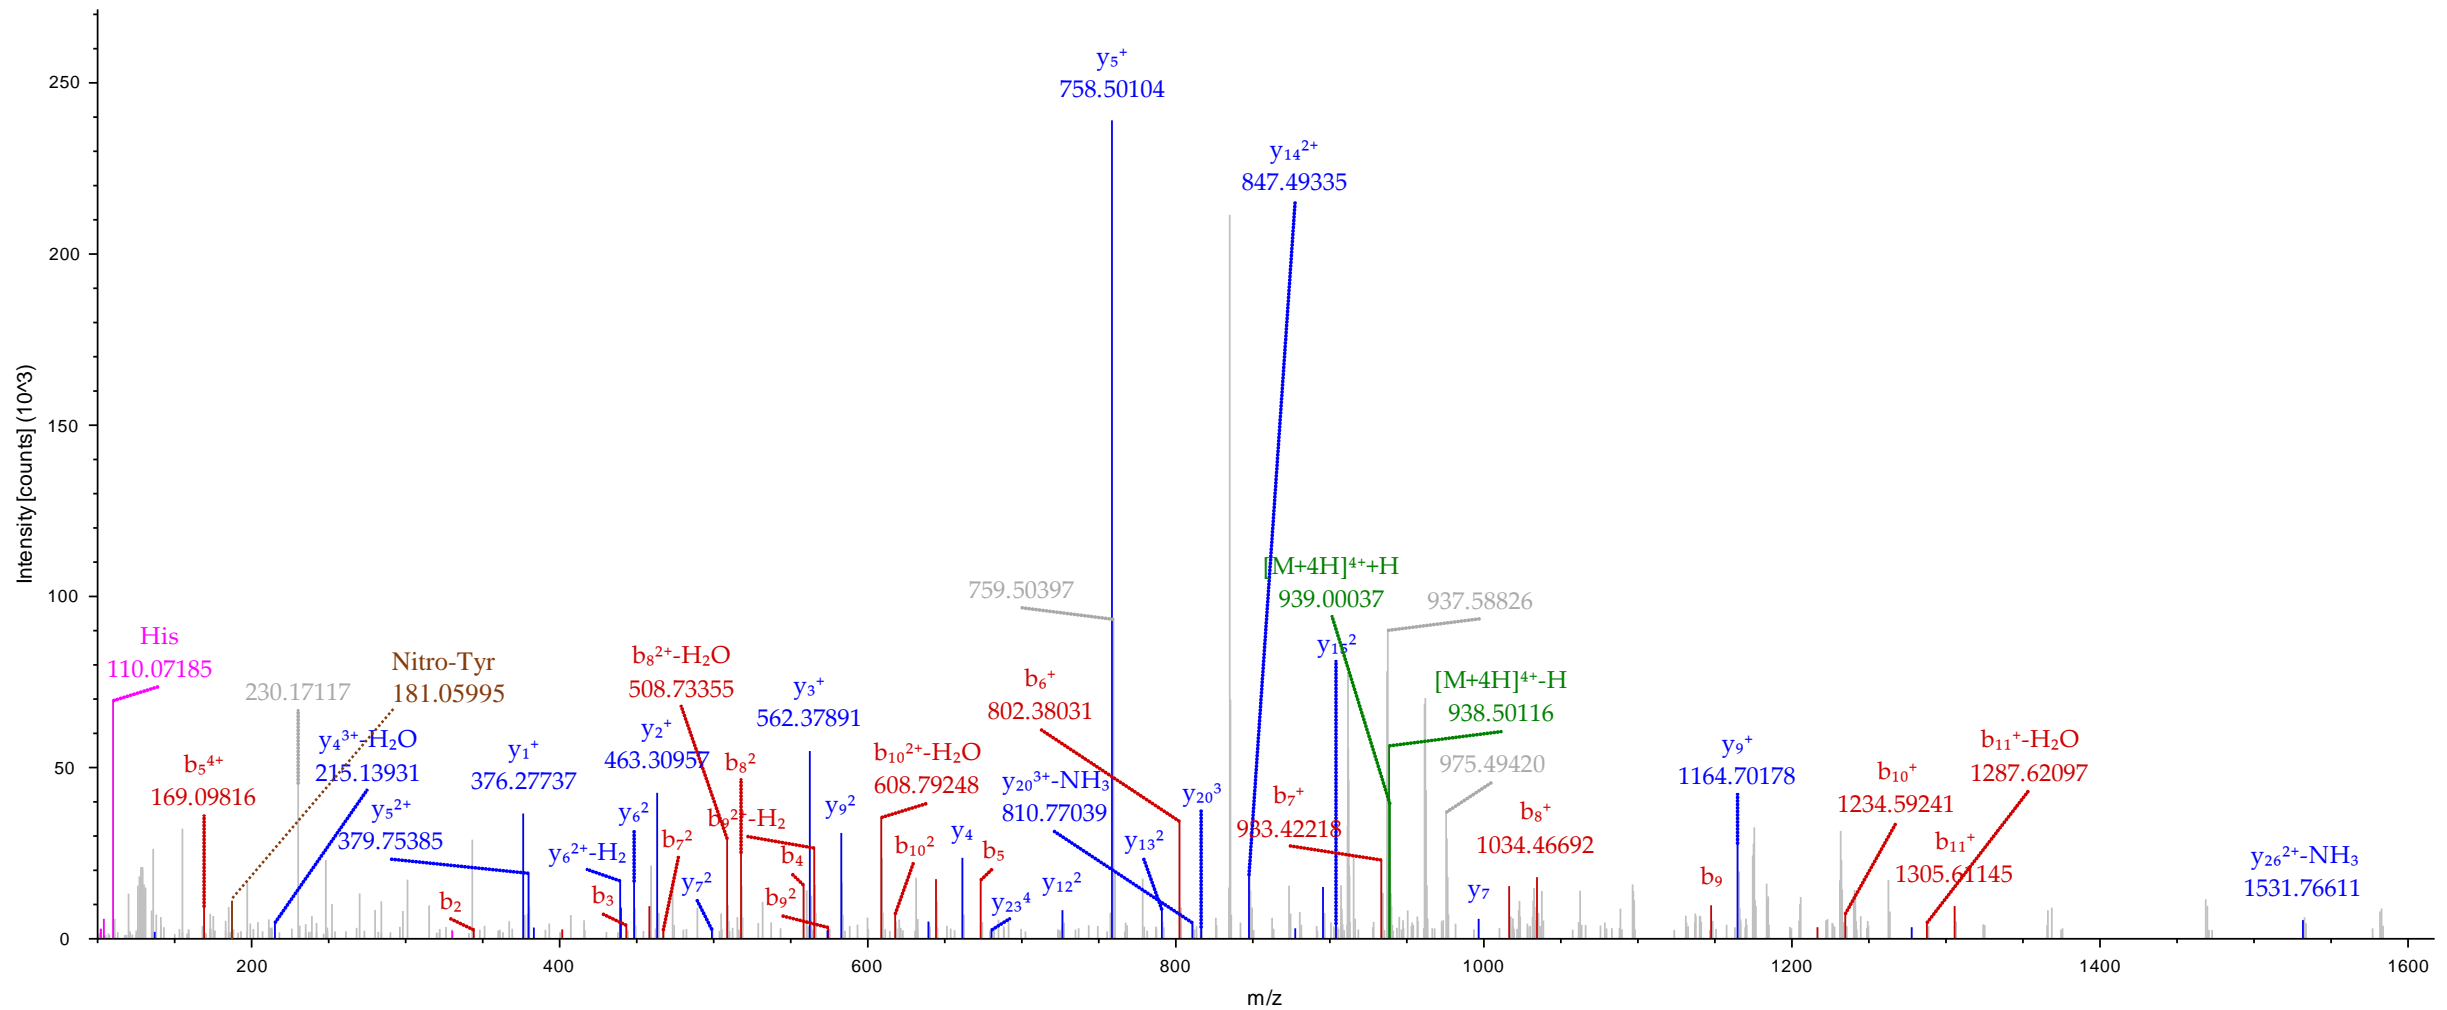

— Pre+H, Precursor, Precursor-H<sub>2</sub>O, Precursor-H<sub>2</sub>O-NH<sub>3</sub>, Precursor-NH<sub>3</sub>, Pre-H     — Immonium  
— y, y-H<sub>2</sub>O, y-NH<sub>3</sub>     — b, b-H<sub>2</sub>O, b-NH<sub>3</sub>

| #1 | Immonium  | b <sup>+</sup> | b <sup>2+</sup> | b <sup>3+</sup> | Seq.        | y <sup>+</sup> | y <sup>2+</sup> | y <sup>3+</sup> | #2 |
|----|-----------|----------------|-----------------|-----------------|-------------|----------------|-----------------|-----------------|----|
| 1  | 315.25936 | 343.25427      | 172.13077       | 115.08961       | L-TMT6plex  |                |                 |                 | 24 |
| 2  | 74.06004  | 444.30195      | 222.65461       | 148.77217       | T           | 2808.39970     | 1404.70349      | 936.80475       | 23 |
| 3  | 44.04948  | 515.33906      | 258.17317       | 172.45121       | A           | 2707.35202     | 1354.17965      | 903.12219       | 22 |
| 4  | 101.07094 | 643.39764      | 322.20246       | 215.13740       | Q           | 2636.31491     | 1318.66109      | 879.44315       | 21 |
| 5  | 70.06513  | 740.45041      | 370.72884       | 247.48832       | P           | 2508.25633     | 1254.63180      | 836.75696       | 20 |
| 6  | 44.04948  | 811.48752      | 406.24740       | 271.16736       | A           | 2411.20356     | 1206.10542      | 804.40604       | 19 |
| 7  | 70.06513  | 908.54028      | 454.77378       | 303.51828       | P           | 2340.16645     | 1170.58686      | 780.72700       | 18 |
| 8  | 60.04439  | 995.57231      | 498.28979       | 332.52896       | S           | 2243.11369     | 1122.06048      | 748.37608       | 17 |
| 9  | 70.06513  | 1092.62508     | 546.81618       | 364.87988       | P           | 2156.08166     | 1078.54447      | 719.36540       | 16 |
| 10 | 102.05496 | 1221.66767     | 611.33747       | 407.89407       | E           | 2059.02889     | 1030.01809      | 687.01448       | 15 |
| 11 | 88.03930  | 1336.69461     | 668.85094       | 446.23639       | D           | 1929.98630     | 965.49679       | 644.00029       | 14 |
| 12 | 86.09643  | 1449.77868     | 725.39298       | 483.93108       | L           | 1814.95936     | 907.98332       | 605.65797       | 13 |
| 13 | 74.06004  | 1550.82635     | 775.91682       | 517.61364       | T           | 1701.87530     | 851.44129       | 567.96328       | 12 |
| 14 | 86.09643  | 1663.91042     | 832.45885       | 555.30832       | L           | 1600.82762     | 800.91745       | 534.28072       | 11 |
| 15 | 60.04439  | 1750.94245     | 875.97486       | 584.31900       | S           | 1487.74355     | 744.37541       | 496.58604       | 10 |
| 16 | 104.05285 | 1881.98293     | 941.49510       | 627.99916       | M           | 1400.71152     | 700.85940       | 467.57536       | 9  |
| 17 | 60.04439  | 1969.01496     | 985.01112       | 657.00984       | S           | 1269.67104     | 635.33916       | 423.89520       | 8  |
| 18 | 74.06004  | 2070.06264     | 1035.53496      | 690.69240       | T           | 1182.63901     | 591.82314       | 394.88452       | 7  |
| 19 | 86.09643  | 2183.14670     | 1092.07699      | 728.38708       | I           | 1081.59133     | 541.29930       | 361.20196       | 6  |
| 20 | 120.04776 | 2330.18210     | 1165.59469      | 777.39888       | M-Oxidation | 968.50727      | 484.75727       | 323.50727       | 5  |
| 21 | 204.07675 | 2561.24649     | 1281.12688      | 854.42035       | W-Nitro     | 821.47187      | 411.23957       | 274.49547       | 4  |
| 22 | 86.09643  | 2674.33056     | 1337.66892      | 892.11504       | L-TMT6plex  | 590.40748      | 295.70738       | 197.47401       | 3  |
| 23 | 74.06004  | 2775.37823     | 1388.19276      | 925.79760       | T           | 477.32341      | 239.16535       | 159.77932       | 2  |
| 24 | 330.27026 |                |                 |                 | K-TMT6plex  | 376.27574      | 188.64151       | 126.09676       | 1  |

JM\_NDplasmaBVM\_TMT\_Fr4\_20171103150556.raw #76907 RT: 242.9362 min  
FTMS, 1050.2358@hcd35.00, z=+3, Mono m/z=1050.2358 Da, MH+=3148.69297 Da, Match Tol.=0.02 Da

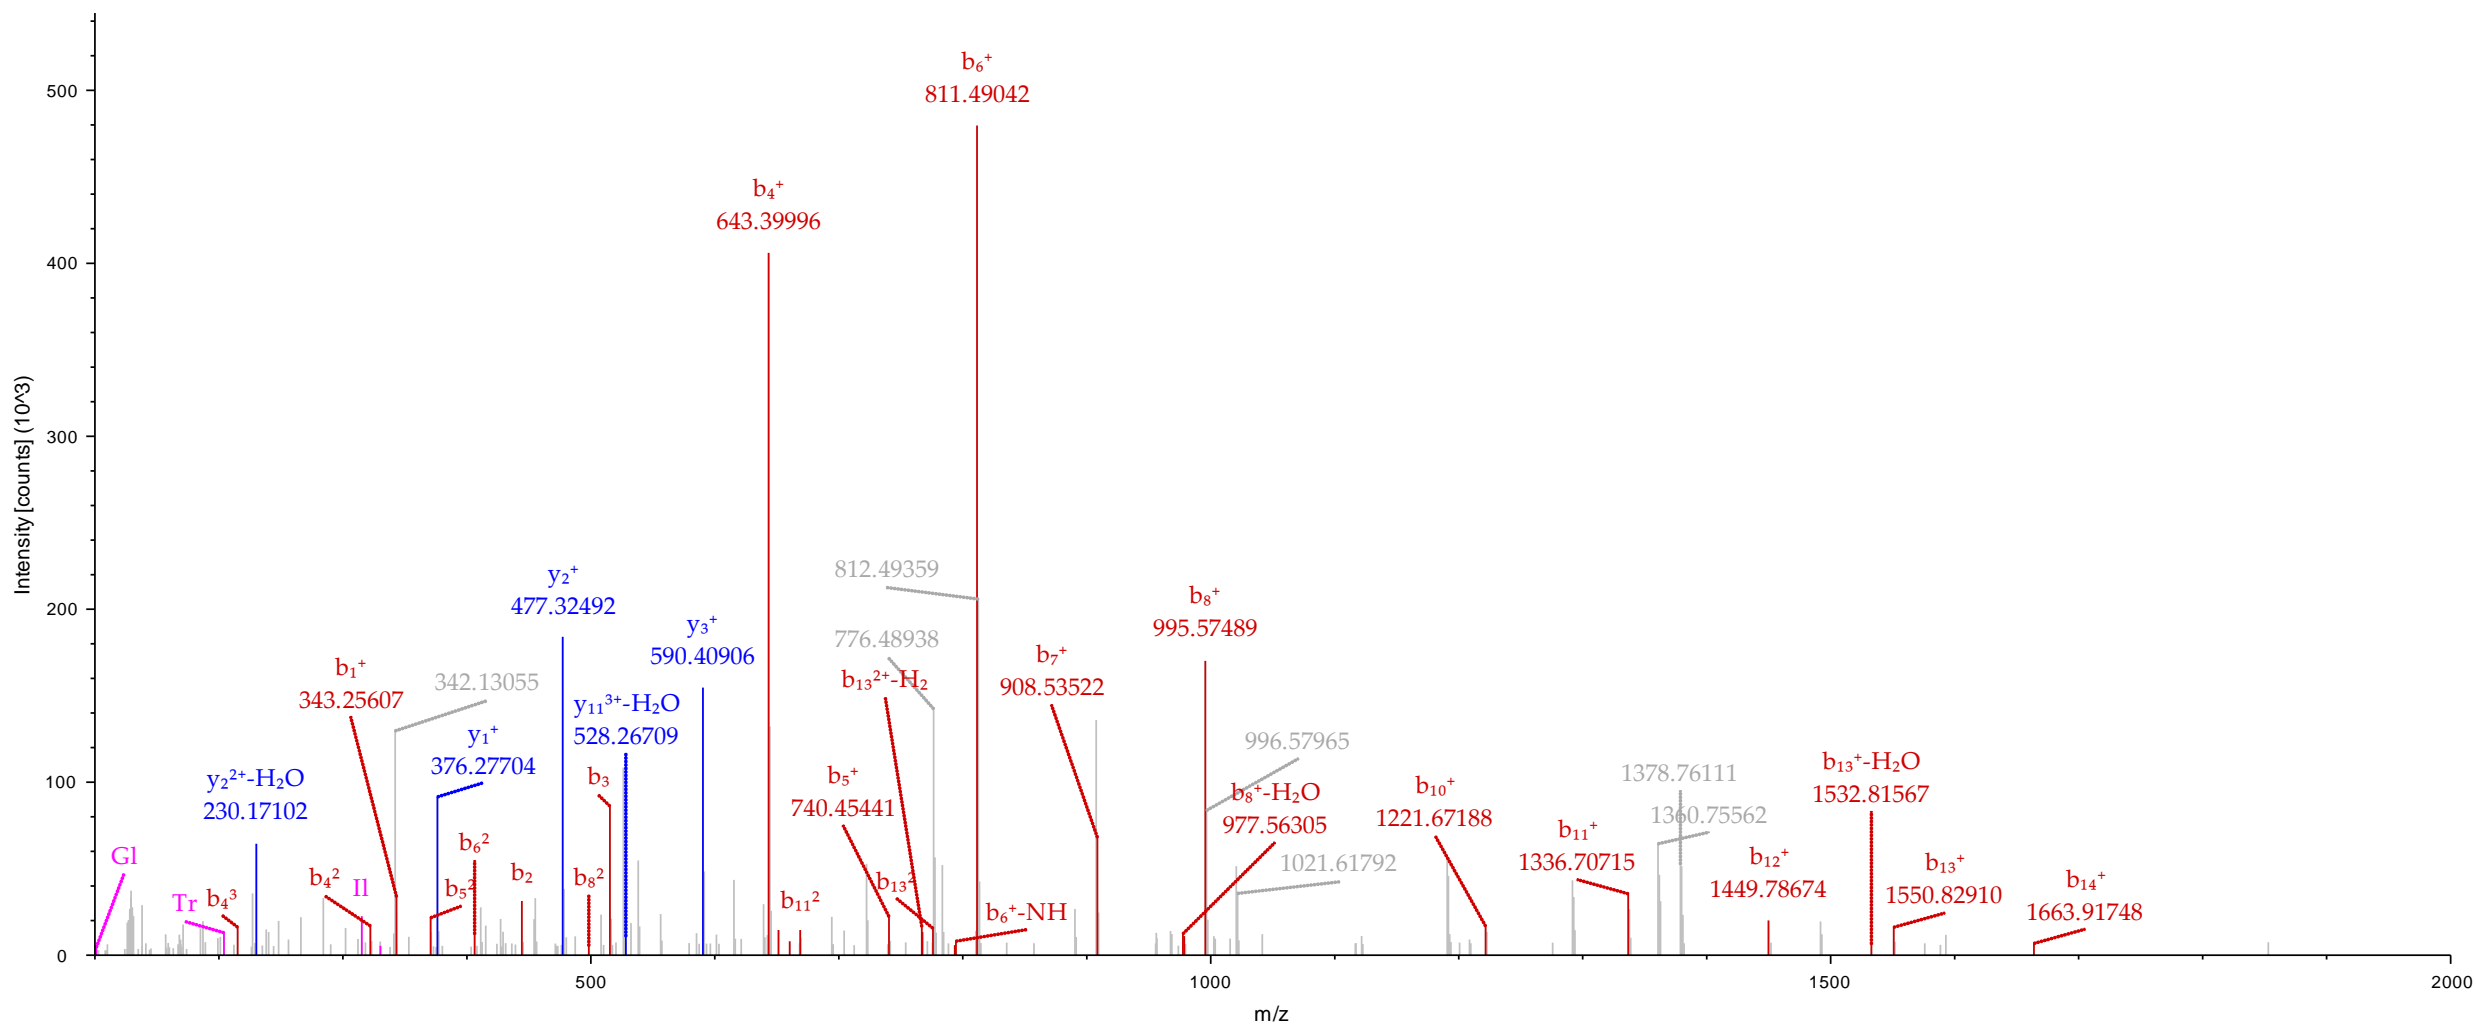

— Pre+H, Precursor, Precursor-H<sub>2</sub>O, Precursor-H<sub>2</sub>O-NH<sub>3</sub>, Precursor-NH<sub>3</sub>, Pre-H — Immonium  
— y, y-H<sub>2</sub>O, y-NH<sub>3</sub> — b, b-H<sub>2</sub>O, b-NH<sub>3</sub>

| #1 | Immonium  | b <sup>+</sup> | b <sup>2+</sup> | b <sup>3+</sup> | b <sup>4+</sup> | b <sup>5+</sup> | Seq.              | y <sup>+</sup> | y <sup>2+</sup> | y <sup>3+</sup> | y <sup>4+</sup> | y <sup>5+</sup> | #2 |
|----|-----------|----------------|-----------------|-----------------|-----------------|-----------------|-------------------|----------------|-----------------|-----------------|-----------------|-----------------|----|
| 1  | 301.24371 | 329.23862      | 165.12295       | 110.41773       | 83.06511        | 66.65355        | V-TMT6plex        |                |                 |                 |                 |                 | 18 |
| 2  | 87.05529  | 443.28155      | 222.14441       | 148.43203       | 111.57584       | 89.46213        | N                 | 2574.01690     | 1287.51209      | 858.67715       | 644.25968       | 515.60920       | 17 |
| 3  | 110.07127 | 580.34046      | 290.67387       | 194.11834       | 145.84057       | 116.87391       | H                 | 2459.97398     | 1230.49063      | 820.66284       | 615.74895       | 492.80062       | 16 |
| 4  | 330.27026 | 937.59836      | 469.30282       | 313.20430       | 235.15505       | 188.32549       | K-TMT6plex        | 2322.91506     | 1161.96117      | 774.97654       | 581.48422       | 465.38883       | 15 |
| 5  | 102.05496 | 1066.64095     | 533.82411       | 356.21850       | 267.41569       | 214.13401       | E                 | 1965.65717     | 983.33222       | 655.89057       | 492.16975       | 393.93726       | 14 |
| 6  | 102.05496 | 1195.68354     | 598.34541       | 399.23270       | 299.67634       | 239.94253       | E                 | 1836.61458     | 918.81093       | 612.87638       | 459.90910       | 368.12874       | 13 |
| 7  | 88.03930  | 1310.71049     | 655.85888       | 437.57501       | 328.43308       | 262.94792       | D                 | 1707.57198     | 854.28963       | 569.86218       | 427.64845       | 342.32022       | 12 |
| 8  | 60.04439  | 1397.74251     | 699.37490       | 466.58569       | 350.19109       | 280.35432       | S                 | 1592.54504     | 796.77616       | 531.51986       | 398.89172       | 319.31483       | 11 |
| 9  | 133.04301 | 1557.77316     | 779.39022       | 519.92924       | 390.19875       | 312.36045       | C-Carbamidomethyl | 1505.51301     | 753.26014       | 502.50919       | 377.13371       | 301.90842       | 10 |
| 10 | 60.04439  | 1644.80519     | 822.90623       | 548.93991       | 411.95676       | 329.76686       | S                 | 1345.48236     | 673.24482       | 449.16564       | 337.12605       | 269.90229       | 9  |
| 11 | 136.07569 | 1807.86852     | 904.43790       | 603.29436       | 452.72259       | 362.37953       | Y                 | 1258.45034     | 629.72881       | 420.15496       | 315.36804       | 252.49589       | 8  |
| 12 | 120.08078 | 1954.93693     | 977.97210       | 652.31716       | 489.48969       | 391.79321       | F                 | 1095.38701     | 548.19714       | 365.80052       | 274.60221       | 219.88322       | 7  |
| 13 | 181.06077 | 2162.98534     | 1081.99631      | 721.66663       | 541.50179       | 433.40289       | Y-Nitro           | 948.31859      | 474.66293       | 316.77772       | 237.83511       | 190.46954       | 6  |
| 14 | 133.04301 | 2323.01599     | 1162.01163      | 775.01018       | 581.50945       | 465.40902       | C-Carbamidomethyl | 740.27019      | 370.63873       | 247.42825       | 185.82300       | 148.85986       | 5  |
| 15 | 120.04776 | 2470.05139     | 1235.52933      | 824.02198       | 618.26830       | 494.81610       | M-Oxidation       | 580.23954      | 290.62341       | 194.08470       | 145.81534       | 116.85373       | 4  |
| 16 | 102.05496 | 2599.09398     | 1300.05063      | 867.03618       | 650.52895       | 520.62462       | E                 | 433.20414      | 217.10571       | 145.07290       | 109.05649       | 87.44665        | 3  |
| 17 | 102.05496 | 2728.13657     | 1364.57193      | 910.05038       | 682.78960       | 546.43314       | E                 | 304.16155      | 152.58441       | 102.05870       | 76.79584        | 61.63813        | 2  |
| 18 | 129.11347 |                |                 |                 |                 |                 | R                 | 175.11895      | 88.06311        | 59.04450        | 44.53520        | 35.82961        | 1  |



| #1 | Immonium  | b <sup>+</sup> | b <sup>2+</sup> | b <sup>3+</sup> | Seq.              | y <sup>+</sup> | y <sup>2+</sup> | y <sup>3+</sup> | #2 |
|----|-----------|----------------|-----------------|-----------------|-------------------|----------------|-----------------|-----------------|----|
| 1  | 301.24371 | 329.23862      | 165.12295       | 110.41773       | V-TMT6plex        |                |                 |                 | 23 |
| 2  | 136.07569 | 492.30195      | 246.65461       | 164.77217       | Y                 | 2946.18072     | 1473.59400      | 982.73176       | 22 |
| 3  | 88.03930  | 607.32889      | 304.16809       | 203.11448       | D                 | 2783.11739     | 1392.06233      | 928.37731       | 21 |
| 4  | 136.07569 | 770.39222      | 385.69975       | 257.46893       | Y                 | 2668.09044     | 1334.54886      | 890.03500       | 20 |
| 5  | 136.07569 | 933.45555      | 467.23141       | 311.82337       | Y                 | 2505.02712     | 1253.01720      | 835.68056       | 19 |
| 6  | 102.05496 | 1062.49814     | 531.75271       | 354.83757       | E                 | 2341.96379     | 1171.48553      | 781.32611       | 18 |
| 7  | 74.06004  | 1163.54582     | 582.27655       | 388.52013       | T                 | 2212.92119     | 1106.96424      | 738.31192       | 17 |
| 8  | 88.03930  | 1278.57277     | 639.79002       | 426.86244       | D                 | 2111.87352     | 1056.44040      | 704.62936       | 16 |
| 9  | 102.05496 | 1407.61536     | 704.31132       | 469.87664       | E                 | 1996.84657     | 998.92692       | 666.28704       | 15 |
| 10 | 104.05285 | 1538.65584     | 769.83156       | 513.55680       | M                 | 1867.80398     | 934.40563       | 623.27284       | 14 |
| 11 | 44.04948  | 1609.69296     | 805.35012       | 537.23584       | A                 | 1736.76350     | 868.88539       | 579.59268       | 13 |
| 12 | 120.08078 | 1756.76137     | 878.88432       | 586.25864       | F                 | 1665.72638     | 833.36683       | 555.91365       | 12 |
| 13 | 44.04948  | 1827.79848     | 914.40288       | 609.93768       | A                 | 1518.65797     | 759.83262       | 506.89084       | 11 |
| 14 | 102.05496 | 1956.84108     | 978.92418       | 652.95188       | E                 | 1447.62085     | 724.31407       | 483.21180       | 10 |
| 15 | 181.06077 | 2164.88948     | 1082.94838      | 722.30135       | Y-Nitro           | 1318.57826     | 659.79277       | 440.19760       | 9  |
| 16 | 60.04439  | 2251.92151     | 1126.46439      | 751.31202       | S                 | 1110.52985     | 555.76857       | 370.84814       | 8  |
| 17 | 60.04439  | 2338.95354     | 1169.98041      | 780.32270       | S                 | 1023.49783     | 512.25255       | 341.83746       | 7  |
| 18 | 70.06513  | 2436.00630     | 1218.50679      | 812.67362       | P                 | 936.46580      | 468.73654       | 312.82678       | 6  |
| 19 | 133.04301 | 2596.03695     | 1298.52211      | 866.01717       | C-Carbamidomethyl | 839.41303      | 420.21016       | 280.47586       | 5  |
| 20 | 60.04439  | 2683.06898     | 1342.03813      | 895.02784       | S                 | 679.38239      | 340.19483       | 227.13231       | 4  |
| 21 | 74.06004  | 2784.11666     | 1392.56197      | 928.71040       | T                 | 592.35036      | 296.67882       | 198.12164       | 3  |
| 22 | 88.03930  | 2899.14360     | 1450.07544      | 967.05272       | D                 | 491.30268      | 246.15498       | 164.43908       | 2  |
| 23 | 330.27026 |                |                 |                 | K-TMT6plex        | 376.27574      | 188.64151       | 126.09676       | 1  |

JM\_NDplasmaBVM\_TMT\_NoFrac.raw #112108 RT: 306.8298 min  
FTMS, 1092.4872@hcd35.00, z=+3, Mono m/z=1092.15393 Da, MH+=3274.44724 Da, Match Tol.=0.02 Da

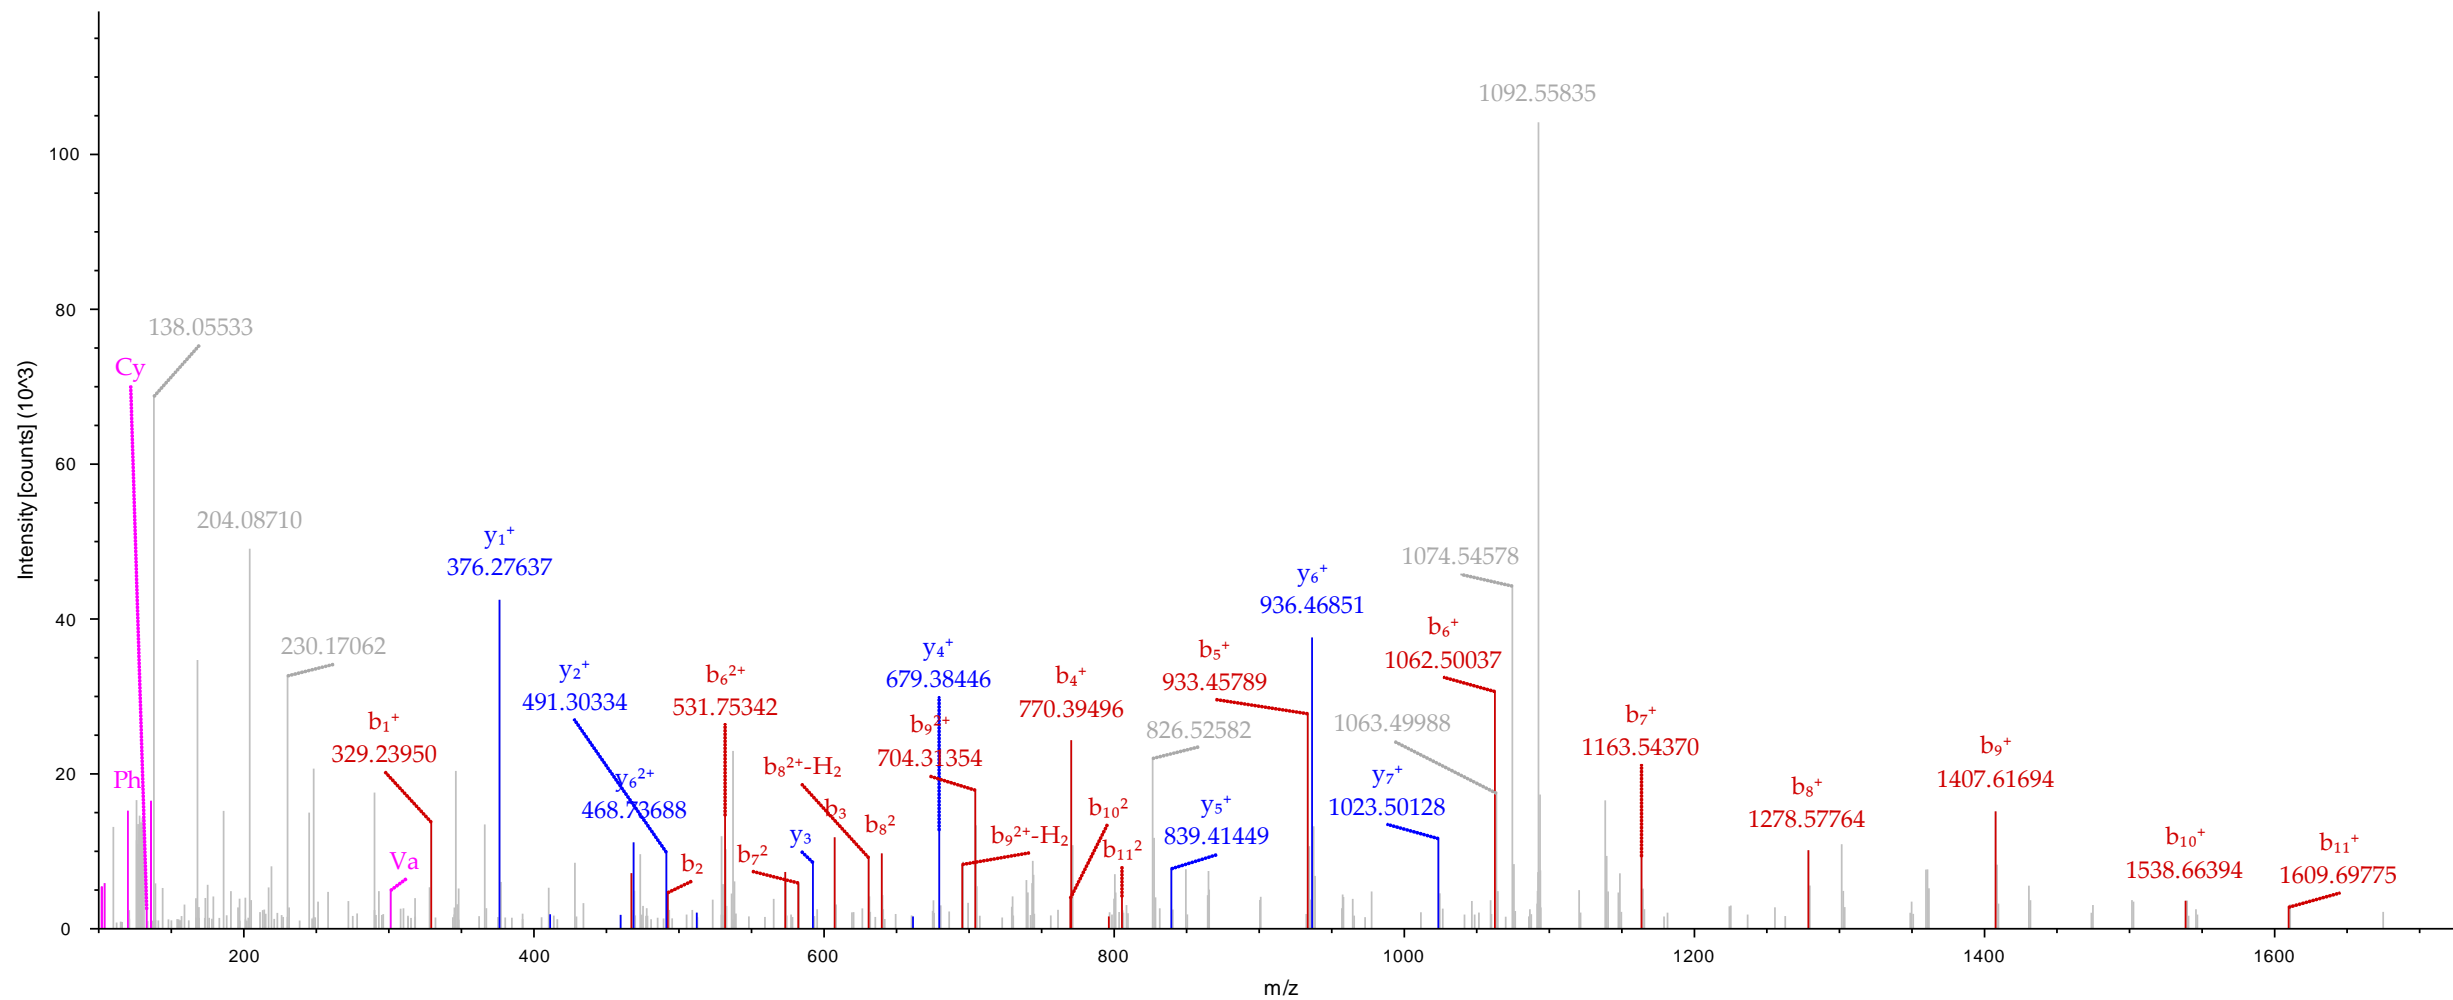

— Pre+H, Precursor, Precursor-H<sub>2</sub>O, Precursor-H<sub>2</sub>O-NH<sub>3</sub>, Precursor-NH<sub>3</sub>, Pre-H — Immonium  
— y, y-H<sub>2</sub>O, y-NH<sub>3</sub> — b, b-H<sub>2</sub>O, b-NH<sub>3</sub>



| #1 | Immonium  | b <sup>+</sup> | b <sup>2+</sup> | b <sup>3+</sup> | Seq.       | y <sup>+</sup> | y <sup>2+</sup> | y <sup>3+</sup> | #2 |
|----|-----------|----------------|-----------------|-----------------|------------|----------------|-----------------|-----------------|----|
| 1  | 365.23862 | 393.23354      | 197.12041       | 131.74936       | Y-TMT6plex |                |                 |                 | 16 |
| 2  | 104.05285 | 524.27402      | 262.64065       | 175.42952       | M          | 2009.04626     | 1005.02677      | 670.35360       | 15 |
| 3  | 72.08078  | 623.34244      | 312.17486       | 208.45233       | V          | 1878.00577     | 939.50653       | 626.67344       | 14 |
| 4  | 86.09643  | 736.42650      | 368.71689       | 246.14702       | L          | 1778.93736     | 889.97232       | 593.65064       | 13 |
| 5  | 72.08078  | 835.49491      | 418.25109       | 279.16982       | V          | 1665.85330     | 833.43029       | 555.95595       | 12 |
| 6  | 70.06513  | 932.54768      | 466.77748       | 311.52074       | P          | 1566.78488     | 783.89608       | 522.93315       | 11 |
| 7  | 60.04439  | 1019.57971     | 510.29349       | 340.53142       | S          | 1469.73212     | 735.36970       | 490.58222       | 10 |
| 8  | 101.07094 | 1147.63828     | 574.32278       | 383.21761       | Q          | 1382.70009     | 691.85368       | 461.57155       | 9  |
| 9  | 86.09643  | 1260.72235     | 630.86481       | 420.91230       | L          | 1254.64151     | 627.82439       | 418.88536       | 8  |
| 10 | 181.06077 | 1468.77075     | 734.88901       | 490.26177       | Y-Nitro    | 1141.55745     | 571.28236       | 381.19067       | 7  |
| 11 | 74.06004  | 1569.81843     | 785.41285       | 523.94433       | T          | 933.50904      | 467.25816       | 311.84120       | 6  |
| 12 | 102.05496 | 1698.86102     | 849.93415       | 566.95853       | E          | 832.46136      | 416.73432       | 278.15864       | 5  |
| 13 | 74.06004  | 1799.90870     | 900.45799       | 600.64109       | T          | 703.41877      | 352.21302       | 235.14444       | 4  |
| 14 | 70.06513  | 1896.96147     | 948.98437       | 632.99201       | P          | 602.37109      | 301.68918       | 201.46188       | 3  |
| 15 | 102.05496 | 2026.00406     | 1013.50567      | 676.00620       | E          | 505.31833      | 253.16280       | 169.11096       | 2  |
| 16 | 330.27026 |                |                 |                 | K-TMT6plex | 376.27574      | 188.64151       | 126.09676       | 1  |

JM\_NDplasmaBVM\_TMT\_NoFrac.raw #101700 RT: 283.8167 min  
 FTMS, 801.4456@hcd35.00, z=+3, Mono m/z=801.44556 Da, MH+=2402.32212 Da, Match Tol.=0.02 Da

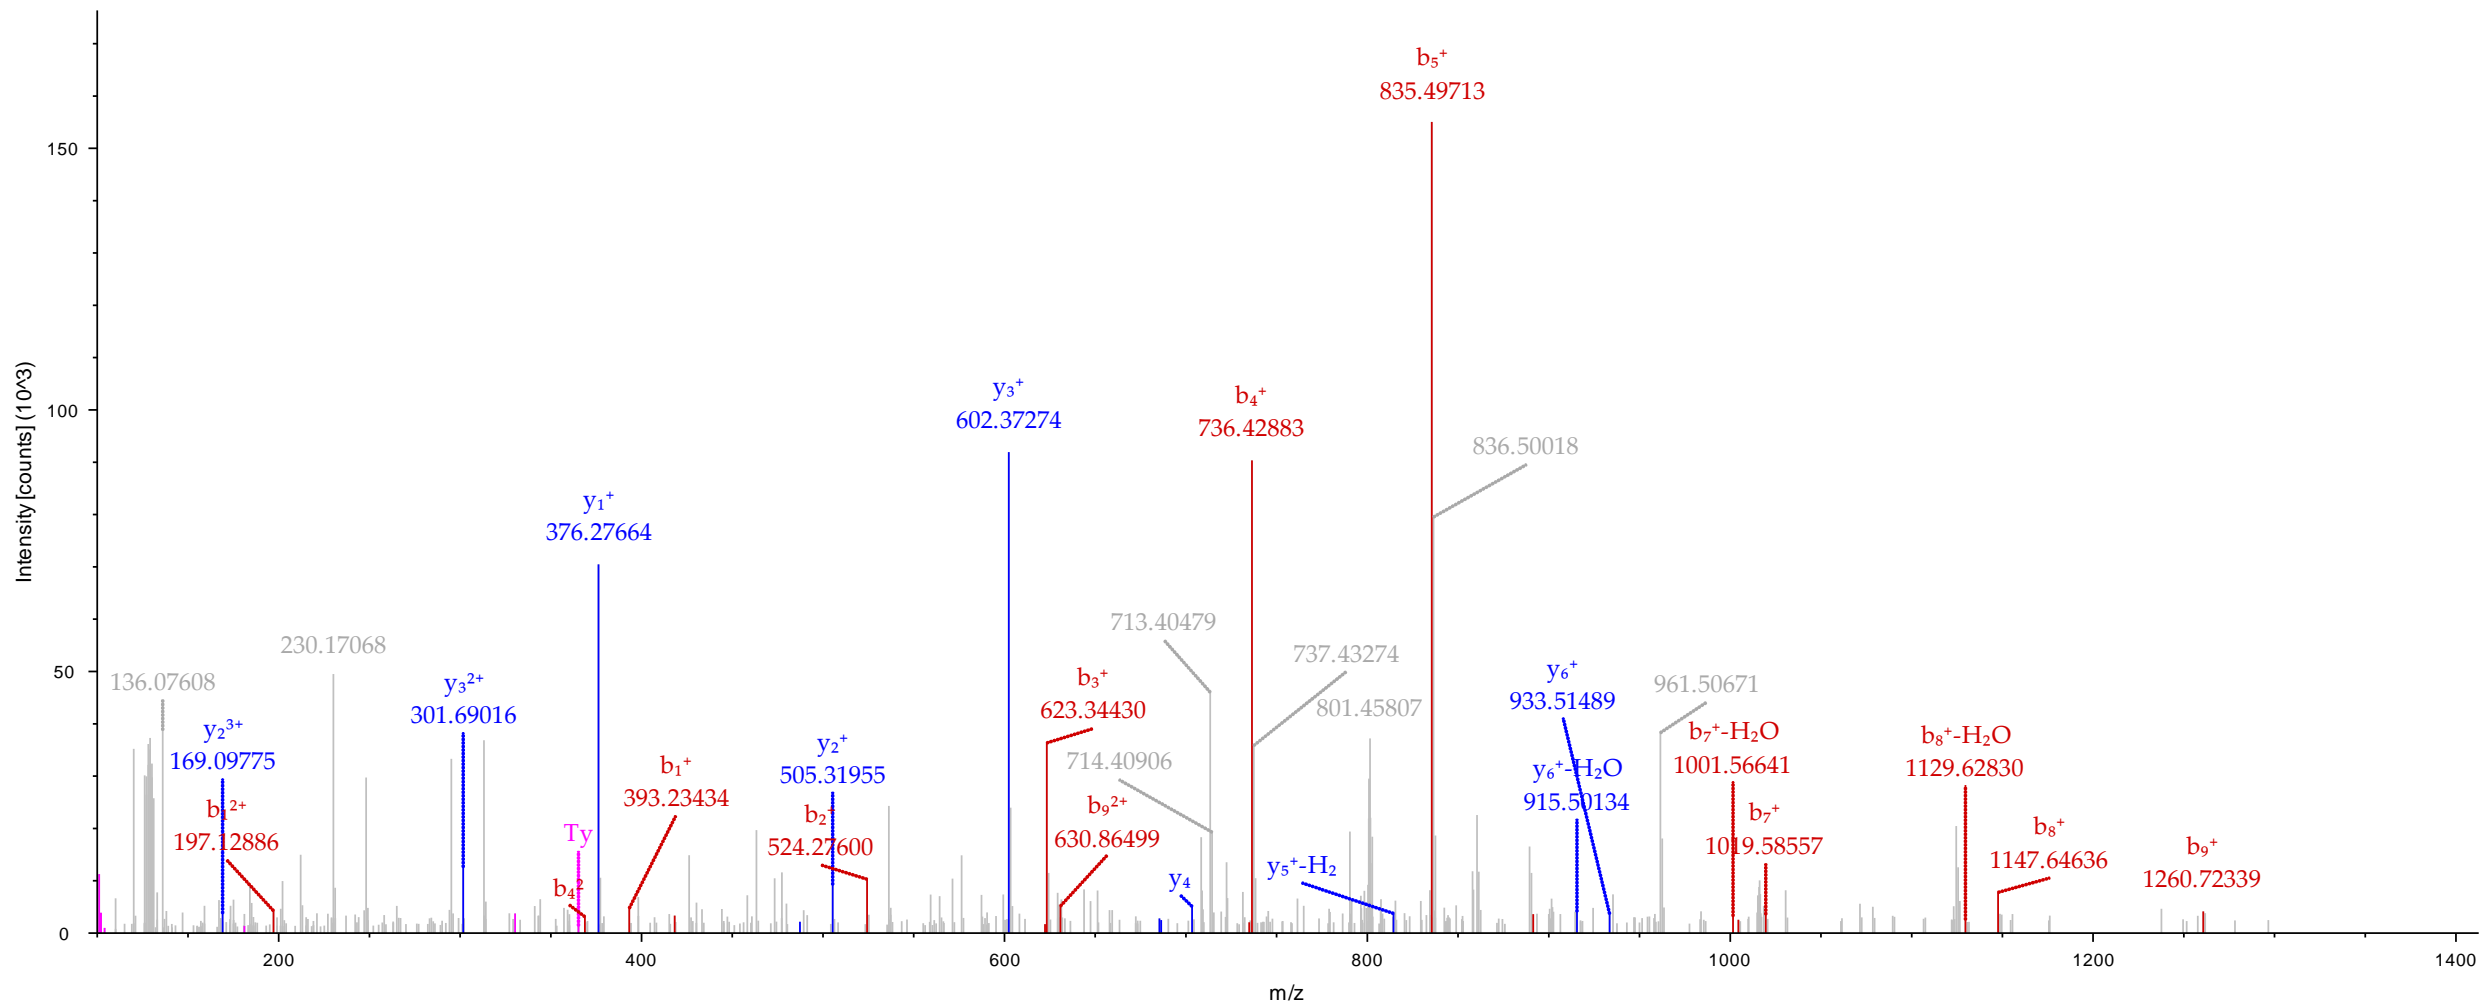

— Pre+H, Precursor, Precursor-H<sub>2</sub>O, Precursor-H<sub>2</sub>O-NH<sub>3</sub>, Precursor-NH<sub>3</sub>, Pre-H  
— y, y-H<sub>2</sub>O, y-NH<sub>3</sub>  
— Immonium  
— b, b-H<sub>2</sub>O, b-NH<sub>3</sub>

| #1 | Immonium  | b <sup>+</sup> | b <sup>2+</sup> | b <sup>3+</sup> | b <sup>4+</sup> | Seq.                       | y <sup>+</sup> | y <sup>2+</sup> | y <sup>3+</sup> | y <sup>4+</sup> | #2 |
|----|-----------|----------------|-----------------|-----------------|-----------------|----------------------------|----------------|-----------------|-----------------|-----------------|----|
| 1  | 362.20594 | 390.20086      | 195.60407       | 130.73847       | 98.30567        | C-TMT6plex-Carbamidomethyl |                |                 |                 |                 | 34 |
| 2  | 60.04439  | 477.23289      | 239.12008       | 159.74915       | 120.06368       | S                          | 3691.60607     | 1846.30668      | 1231.20688      | 923.65698       | 33 |
| 3  | 102.05496 | 606.27548      | 303.64138       | 202.76334       | 152.32433       | E                          | 3604.57405     | 1802.79066      | 1202.19620      | 901.89897       | 32 |
| 4  | 74.06004  | 707.32316      | 354.16522       | 236.44590       | 177.58625       | T                          | 3475.53145     | 1738.26936      | 1159.18200      | 869.63832       | 31 |
| 5  | 30.03383  | 764.34462      | 382.67595       | 255.45306       | 191.84161       | G                          | 3374.48377     | 1687.74553      | 1125.49944      | 844.37640       | 30 |
| 6  | 30.03383  | 821.36608      | 411.18668       | 274.46021       | 206.09698       | G                          | 3317.46231     | 1659.23479      | 1106.49229      | 830.12104       | 29 |
| 7  | 60.04439  | 908.39811      | 454.70269       | 303.47089       | 227.85499       | S                          | 3260.44085     | 1630.72406      | 1087.48513      | 815.86567       | 28 |
| 8  | 72.08078  | 1007.46653     | 504.23690       | 336.49369       | 252.62209       | V                          | 3173.40882     | 1587.20805      | 1058.47446      | 794.10766       | 27 |
| 9  | 72.08078  | 1106.53494     | 553.77111       | 369.51650       | 277.38919       | V                          | 3074.34040     | 1537.67384      | 1025.45165      | 769.34056       | 26 |
| 10 | 102.05496 | 1235.57753     | 618.29240       | 412.53070       | 309.64984       | E                          | 2975.27199     | 1488.13963      | 992.42885       | 744.57346       | 25 |
| 11 | 86.09643  | 1348.66160     | 674.83444       | 450.22538       | 337.92086       | L                          | 2846.22940     | 1423.61834      | 949.41465       | 712.31281       | 24 |
| 12 | 70.06513  | 1445.71436     | 723.36082       | 482.57630       | 362.18405       | P                          | 2733.14533     | 1367.07631      | 911.71996       | 684.04179       | 23 |
| 13 | 74.06004  | 1546.76204     | 773.88466       | 516.25886       | 387.44597       | T                          | 2636.09257     | 1318.54992      | 879.36904       | 659.77860       | 22 |
| 14 | 72.08078  | 1645.83045     | 823.41886       | 549.28167       | 412.21307       | V                          | 2535.04489     | 1268.02608      | 845.68648       | 634.51668       | 21 |
| 15 | 60.04439  | 1732.86248     | 866.93488       | 578.29234       | 433.97108       | S                          | 2435.97648     | 1218.49188      | 812.66368       | 609.74958       | 20 |
| 16 | 101.07094 | 1860.92106     | 930.96417       | 620.97854       | 465.98572       | Q                          | 2348.94445     | 1174.97586      | 783.65300       | 587.99157       | 19 |
| 17 | 102.05496 | 1989.96365     | 995.48546       | 663.99274       | 498.24637       | E                          | 2220.88587     | 1110.94657      | 740.96681       | 555.97693       | 18 |
| 18 | 70.06513  | 2087.01642     | 1044.01185      | 696.34366       | 522.50956       | P                          | 2091.84328     | 1046.42528      | 697.95261       | 523.71628       | 17 |
| 19 | 60.04439  | 2174.04844     | 1087.52786      | 725.35433       | 544.26757       | S                          | 1994.79052     | 997.89890       | 665.60169       | 499.45309       | 16 |
| 20 | 30.03383  | 2231.06991     | 1116.03859      | 744.36149       | 558.52293       | G                          | 1907.75849     | 954.38288       | 636.59101       | 477.69508       | 15 |
| 21 | 70.06513  | 2328.12267     | 1164.56497      | 776.71241       | 582.78613       | P                          | 1850.73702     | 925.87215       | 617.58386       | 463.43971       | 14 |
| 22 | 60.04439  | 2415.15470     | 1208.08099      | 805.72308       | 604.54413       | S                          | 1753.68426     | 877.34577       | 585.23294       | 439.17652       | 13 |
| 23 | 88.03930  | 2530.18164     | 1265.59446      | 844.06540       | 633.30087       | D                          | 1666.65223     | 833.82975       | 556.22226       | 417.41852       | 12 |
| 24 | 60.04439  | 2617.21367     | 1309.11047      | 873.07607       | 655.05888       | S                          | 1551.62529     | 776.31628       | 517.87995       | 388.66178       | 11 |
| 25 | 102.05496 | 2746.25626     | 1373.63177      | 916.09027       | 687.31952       | E                          | 1464.59326     | 732.80027       | 488.86927       | 366.90377       | 10 |
| 26 | 74.06004  | 2847.30394     | 1424.15561      | 949.77283       | 712.58144       | T                          | 1335.55067     | 668.27897       | 445.85507       | 334.64312       | 9  |
| 27 | 88.03930  | 2962.33089     | 1481.66908      | 988.11515       | 741.33818       | D                          | 1234.50299     | 617.75513       | 412.17251       | 309.38120       | 8  |
| 28 | 133.04301 | 3122.36153     | 1561.68441      | 1041.45870      | 781.34584       | C-Carbamidomethyl          | 1119.47605     | 560.24166       | 373.83020       | 280.62447       | 7  |
| 29 | 120.04776 | 3269.39693     | 1635.20211      | 1090.47050      | 818.10469       | M-Oxidation                | 959.44540      | 480.22634       | 320.48665       | 240.61681       | 6  |
| 30 | 181.06077 | 3477.44534     | 1739.22631      | 1159.81996      | 870.11679       | Y-Nitro                    | 812.41000      | 406.70864       | 271.47485       | 203.85796       | 5  |
| 31 | 30.03383  | 3534.46680     | 1767.73704      | 1178.82712      | 884.37216       | G                          | 604.36159      | 302.68443       | 202.12538       | 151.84586       | 4  |
| 32 | 87.05529  | 3648.50973     | 1824.75850      | 1216.84143      | 912.88289       | N                          | 547.34013      | 274.17370       | 183.11823       | 137.59049       | 3  |
| 33 | 30.03383  | 3705.53120     | 1853.26924      | 1235.84858      | 927.13826       | G                          | 433.29720      | 217.15224       | 145.10392       | 109.07976       | 2  |
| 34 | 330.27026 |                |                 |                 |                 | K-TMT6plex                 | 376.27574      | 188.64151       | 126.09676       | 94.82439        | 1  |

JM\_NDplasmaBVM\_TMT\_Fr2.raw #59854 RT: 197.7487 min  
FTMS, 1020.7135@hcd35.00, z=+4, Mono m/z=1020.21271 Da, MH+=4077.82900 Da, Match Tol.=0.02 Da

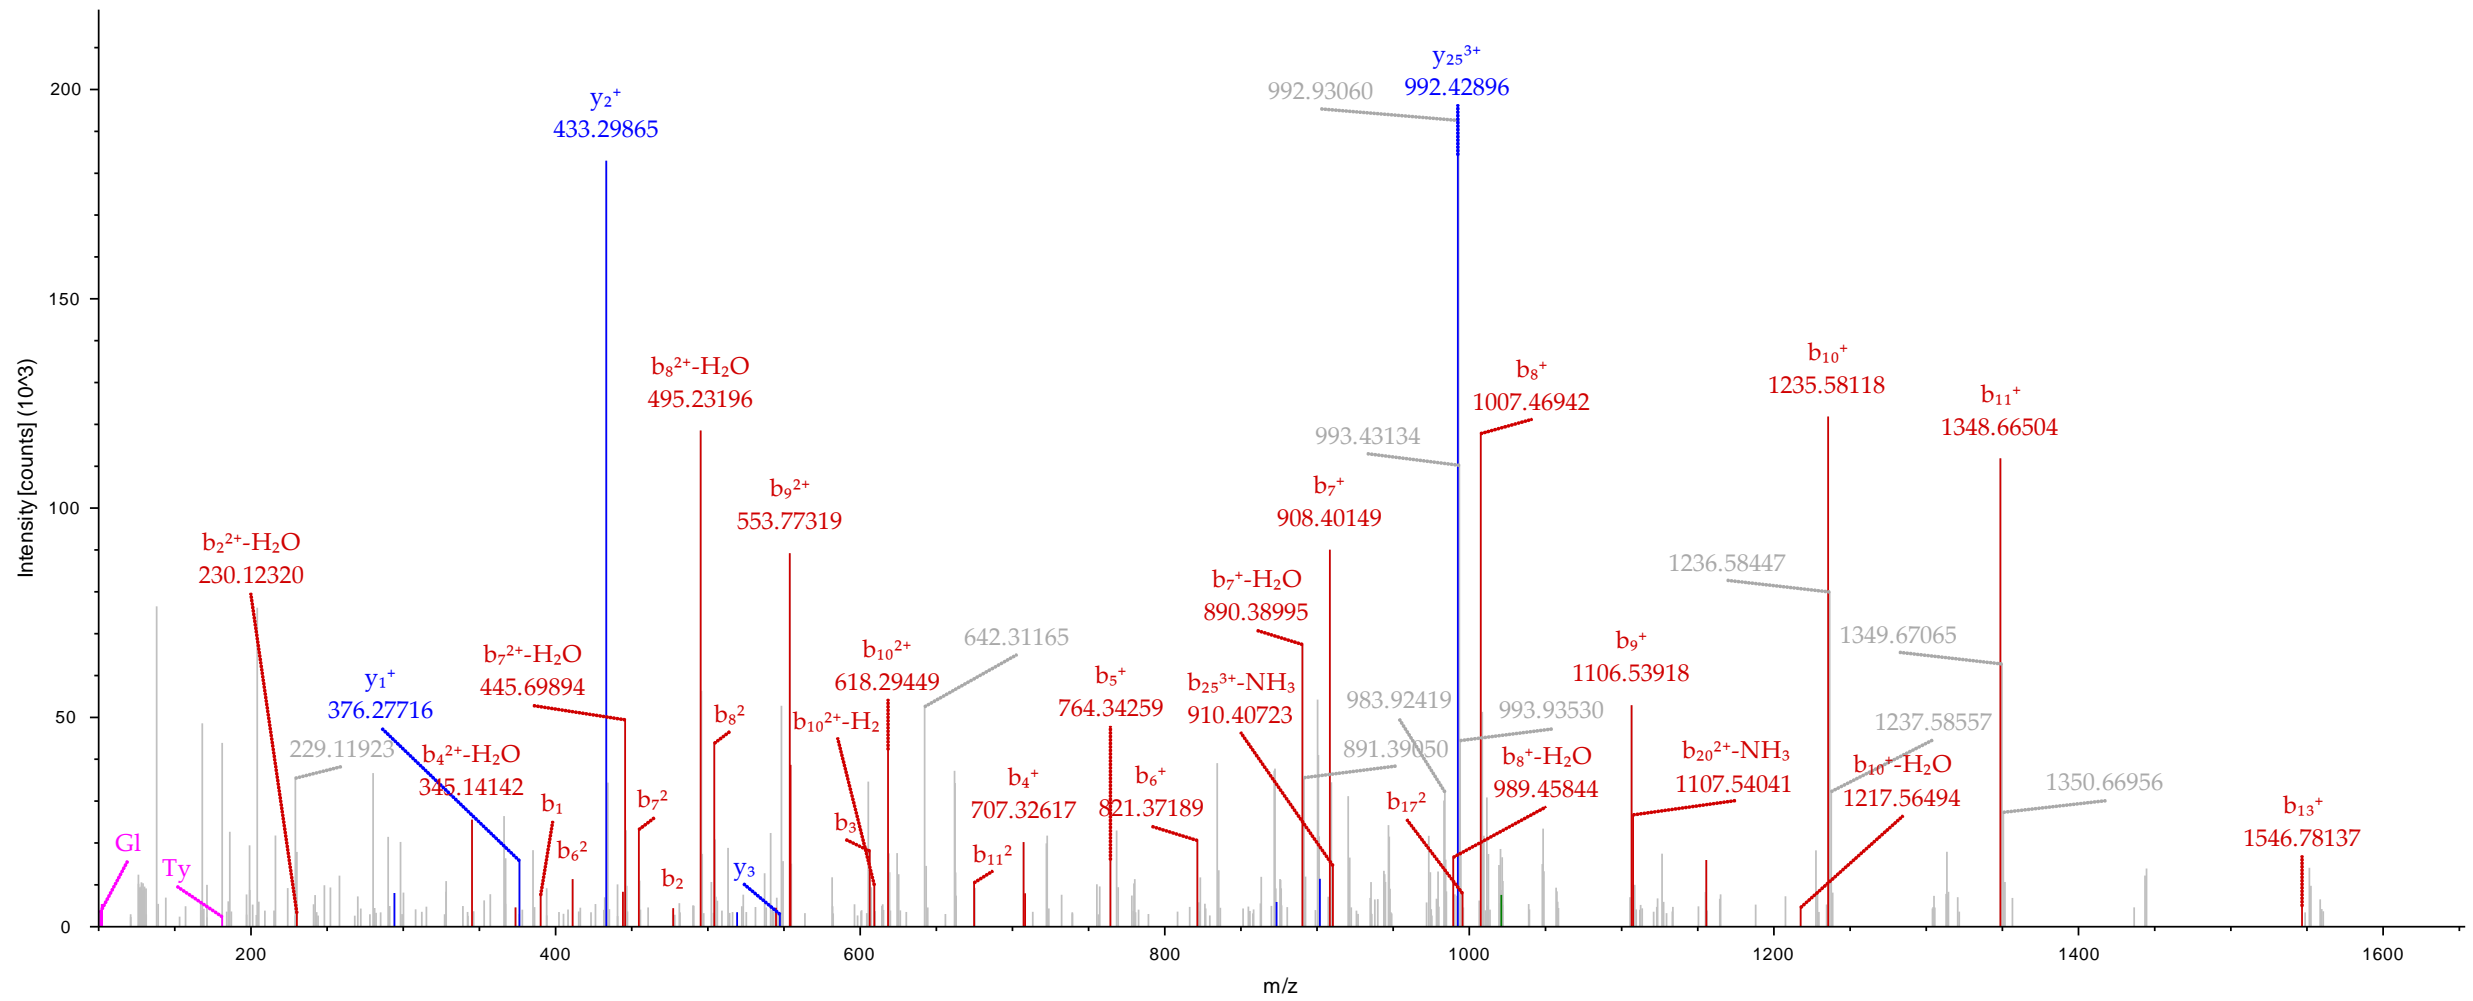

— Pre+H, Precursor, Precursor-H<sub>2</sub>O, Precursor-H<sub>2</sub>O-NH<sub>3</sub>, Precursor-NH<sub>3</sub>, Pre-H — Immonium  
— y, y-H<sub>2</sub>O, y-NH<sub>3</sub> — b, b-H<sub>2</sub>O, b-NH<sub>3</sub>

| #1 | Immonium  | b <sup>+</sup> | b <sup>2+</sup> | b <sup>3+</sup> | Seq.              | y <sup>+</sup> | y <sup>2+</sup> | y <sup>3+</sup> | #2 |
|----|-----------|----------------|-----------------|-----------------|-------------------|----------------|-----------------|-----------------|----|
| 1  | 365.23862 | 393.23354      | 197.12041       | 131.74936       | Y-TMT6plex        |                |                 |                 | 20 |
| 2  | 88.03930  | 508.26048      | 254.63388       | 170.09168       | D                 | 2763.01862     | 1382.01295      | 921.67772       | 19 |
| 3  | 136.07569 | 671.32381      | 336.16554       | 224.44612       | Y                 | 2647.99168     | 1324.49948      | 883.33541       | 18 |
| 4  | 133.04301 | 831.35446      | 416.18087       | 277.78967       | C-Carbamidomethyl | 2484.92835     | 1242.96781      | 828.98097       | 17 |
| 5  | 87.05529  | 945.39738      | 473.20233       | 315.80398       | N                 | 2324.89770     | 1162.95249      | 775.63742       | 16 |
| 6  | 86.09643  | 1058.48145     | 529.74436       | 353.49867       | I                 | 2210.85477     | 1105.93102      | 737.62311       | 15 |
| 7  | 70.06513  | 1155.53421     | 578.27074       | 385.84959       | P                 | 2097.77071     | 1049.38899      | 699.92842       | 14 |
| 8  | 102.05496 | 1284.57681     | 642.79204       | 428.86379       | E                 | 2000.71794     | 1000.86261      | 667.57750       | 13 |
| 9  | 133.04301 | 1444.60745     | 722.80737       | 482.20734       | C-Carbamidomethyl | 1871.67535     | 936.34131       | 624.56330       | 12 |
| 10 | 102.05496 | 1573.65005     | 787.32866       | 525.22153       | E                 | 1711.64470     | 856.32599       | 571.21975       | 11 |
| 11 | 102.05496 | 1702.69264     | 851.84996       | 568.23573       | E                 | 1582.60211     | 791.80469       | 528.20555       | 10 |
| 12 | 102.05496 | 1831.73523     | 916.37125       | 611.24993       | E                 | 1453.55952     | 727.28340       | 485.19136       | 9  |
| 13 | 133.04301 | 1991.76588     | 996.38658       | 664.59348       | C-Carbamidomethyl | 1324.51692     | 662.76210       | 442.17716       | 8  |
| 14 | 120.04776 | 2138.80128     | 1069.90428      | 713.60528       | M-Oxidation       | 1164.48628     | 582.74678       | 388.83361       | 7  |
| 15 | 181.06077 | 2346.84969     | 1173.92848      | 782.95475       | Y-Nitro           | 1017.45088     | 509.22908       | 339.82181       | 6  |
| 16 | 133.04301 | 2506.88034     | 1253.94381      | 836.29830       | C-Carbamidomethyl | 809.40247      | 405.20487       | 270.47234       | 5  |
| 17 | 60.04439  | 2593.91236     | 1297.45982      | 865.30897       | S                 | 649.37182      | 325.18955       | 217.12879       | 4  |
| 18 | 30.03383  | 2650.93383     | 1325.97055      | 884.31613       | G                 | 562.33979      | 281.67353       | 188.11812       | 3  |
| 19 | 102.05496 | 2779.97642     | 1390.49185      | 927.33032       | E                 | 505.31833      | 253.16280       | 169.11096       | 2  |
| 20 | 330.27026 |                |                 |                 | K-TMT6plex        | 376.27574      | 188.64151       | 126.09676       | 1  |

JM\_NDplasmaBVM\_TMT\_Fr2.raw #60406 RT: 199.0151 min  
FTMS, 1052.4305@hcd35.00, z=+3, Mono m/z=1052.43054 Da, MH+=3155.27707 Da, Match Tol.=0.02 Da

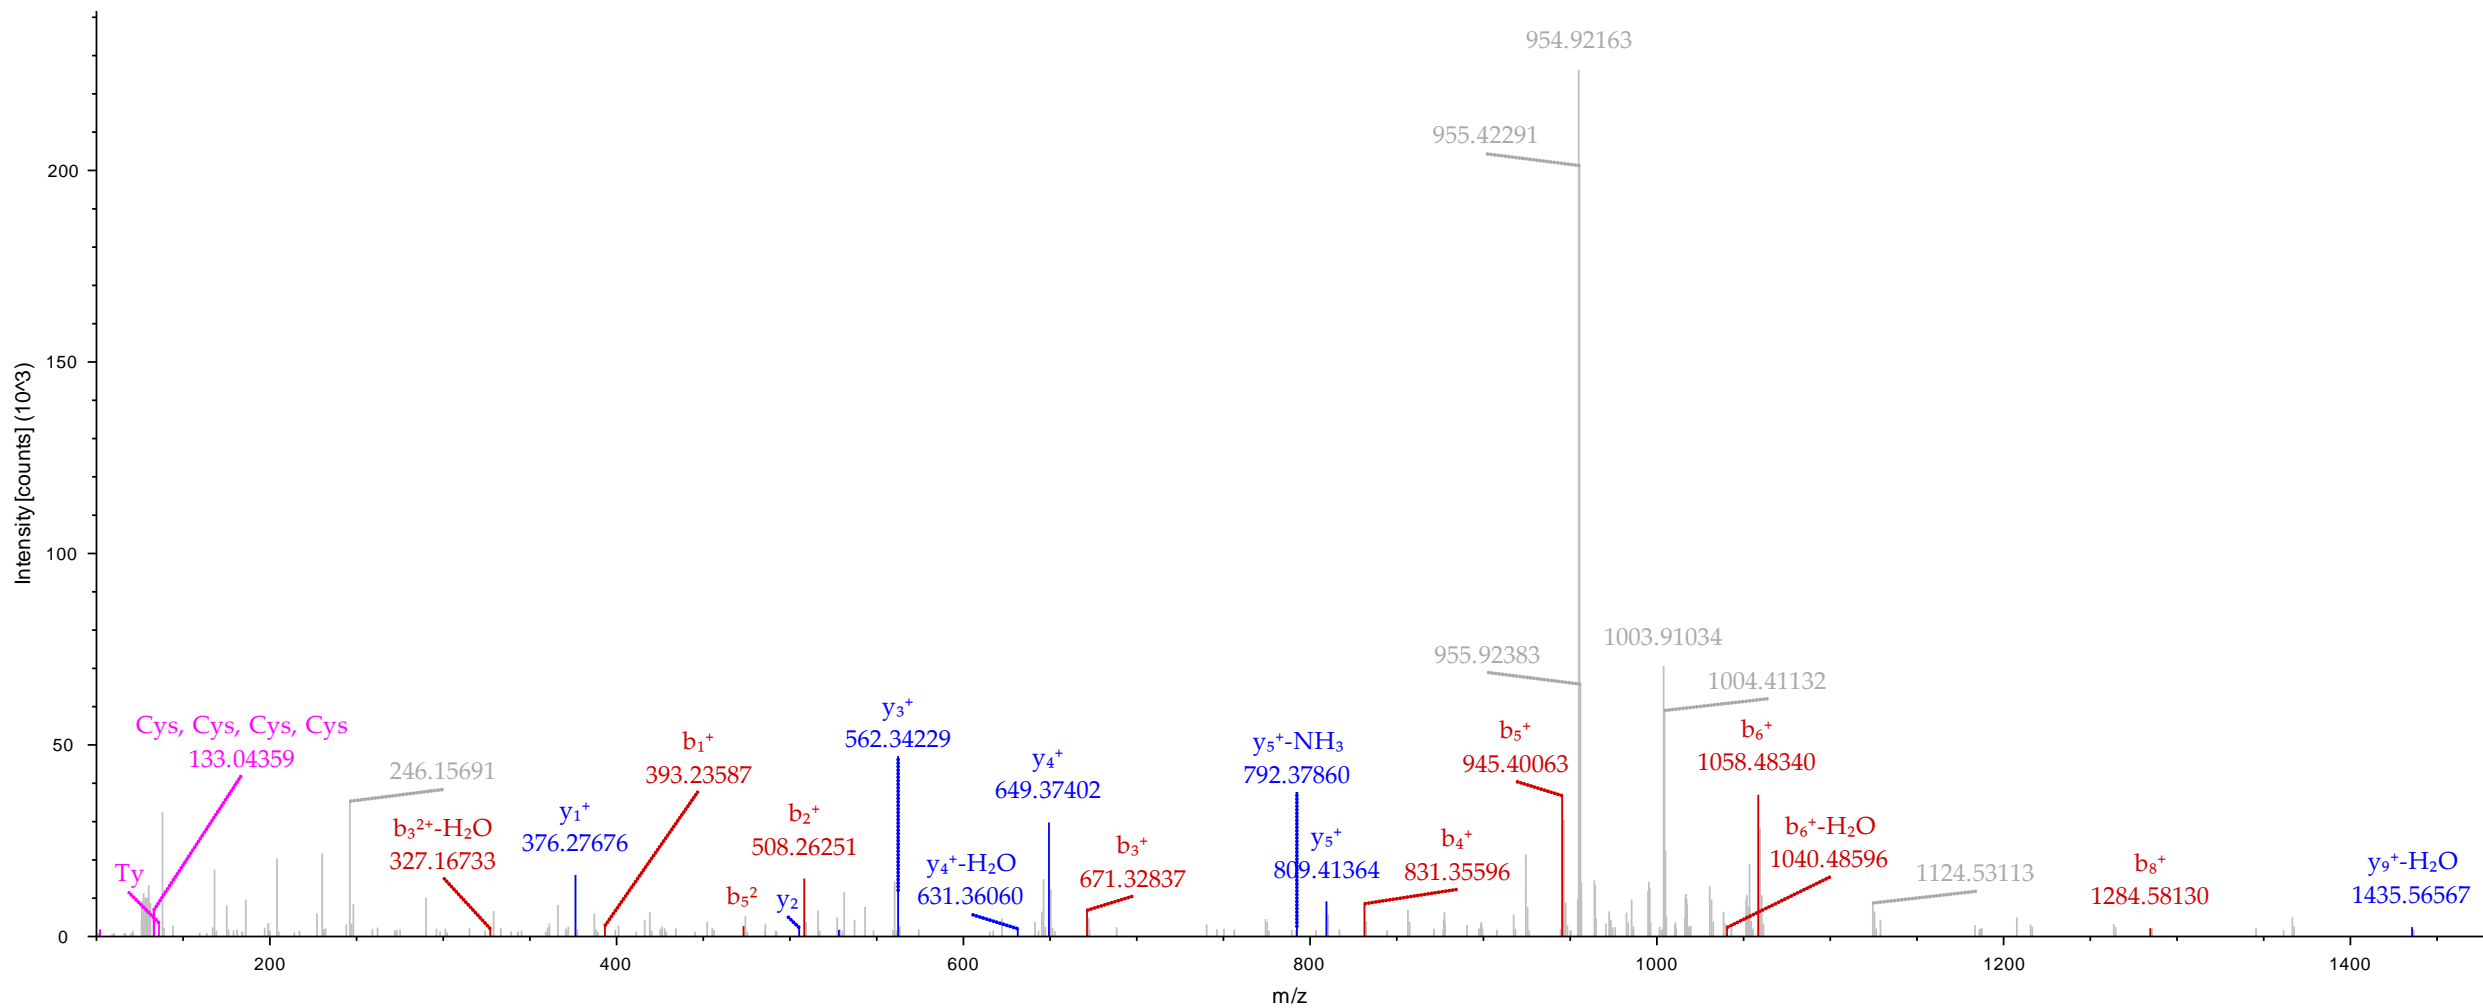

— Pre+H, Precursor, Precursor-H<sub>2</sub>O, Precursor-H<sub>2</sub>O-NH<sub>3</sub>, Precursor-NH<sub>3</sub>, Pre-H — Immonium  
— y, y-H<sub>2</sub>O, y-NH<sub>3</sub> — b, b-H<sub>2</sub>O, b-NH<sub>3</sub>

| #1 | Immonium  | b <sup>+</sup> | b <sup>2+</sup> | b <sup>3+</sup> | Seq.       | y <sup>+</sup> | y <sup>2+</sup> | y <sup>3+</sup> | #2 |
|----|-----------|----------------|-----------------|-----------------|------------|----------------|-----------------|-----------------|----|
| 1  | 273.21241 | 301.20732      | 151.10730       | 101.07396       | A-TMT6plex |                |                 |                 | 22 |
| 2  | 104.05285 | 432.24781      | 216.62754       | 144.75412       | M          | 2427.09889     | 1214.05308      | 809.70448       | 21 |
| 3  | 30.03383  | 489.26927      | 245.13827       | 163.76127       | G          | 2296.05841     | 1148.53284      | 766.02432       | 20 |
| 4  | 72.08078  | 588.33768      | 294.67248       | 196.78408       | V          | 2239.03694     | 1120.02211      | 747.01717       | 19 |
| 5  | 70.06513  | 685.39045      | 343.19886       | 229.13500       | P          | 2139.96853     | 1070.48790      | 713.99436       | 18 |
| 6  | 104.05285 | 816.43093      | 408.71910       | 272.81516       | M          | 2042.91577     | 1021.96152      | 681.64344       | 17 |
| 7  | 104.05285 | 947.47142      | 474.23935       | 316.49532       | M          | 1911.87528     | 956.44128       | 637.96328       | 16 |
| 8  | 30.03383  | 1004.49288     | 502.75008       | 335.50248       | G          | 1780.83480     | 890.92104       | 594.28312       | 15 |
| 9  | 86.09643  | 1117.57695     | 559.29211       | 373.19717       | L          | 1723.81333     | 862.41030       | 575.27596       | 14 |
| 10 | 88.03930  | 1232.60389     | 616.80558       | 411.53948       | D          | 1610.72927     | 805.86827       | 537.58127       | 13 |
| 11 | 181.06077 | 1440.65229     | 720.82979       | 480.88895       | Y-Nitro    | 1495.70233     | 748.35480       | 499.23896       | 12 |
| 12 | 60.04439  | 1527.68432     | 764.34580       | 509.89963       | S          | 1287.65392     | 644.33060       | 429.88949       | 11 |
| 13 | 88.03930  | 1642.71127     | 821.85927       | 548.24194       | D          | 1200.62189     | 600.81458       | 400.87881       | 10 |
| 14 | 102.05496 | 1771.75386     | 886.38057       | 591.25614       | E          | 1085.59495     | 543.30111       | 362.53650       | 9  |
| 15 | 86.09643  | 1884.83792     | 942.92260       | 628.95083       | I          | 956.55236      | 478.77982       | 319.52230       | 8  |
| 16 | 87.05529  | 1998.88085     | 999.94406       | 666.96513       | N          | 843.46829      | 422.23778       | 281.82761       | 7  |
| 17 | 101.07094 | 2126.93943     | 1063.97335      | 709.65133       | Q          | 729.42536      | 365.21632       | 243.81331       | 6  |
| 18 | 72.08078  | 2226.00784     | 1113.50756      | 742.67413       | V          | 601.36679      | 301.18703       | 201.12711       | 5  |
| 19 | 72.08078  | 2325.07626     | 1163.04177      | 775.69694       | V          | 502.29837      | 251.65282       | 168.10431       | 4  |
| 20 | 102.05496 | 2454.11885     | 1227.56306      | 818.71113       | E          | 403.22996      | 202.11862       | 135.08150       | 3  |
| 21 | 72.08078  | 2553.18726     | 1277.09727      | 851.73394       | V          | 274.18737      | 137.59732       | 92.06731        | 2  |
| 22 | 129.11347 |                |                 |                 | R          | 175.11895      | 88.06311        | 59.04450        | 1  |

JM\_NDplasmaBVM\_TMT\_Fr2.raw #88198 RT: 263.4127 min  
FTMS, 910.1421 @hcd35.00, z=+3, Mono m/z=910.14209 Da, MH+=2728.41172 Da, Match Tol.=0.02 Da

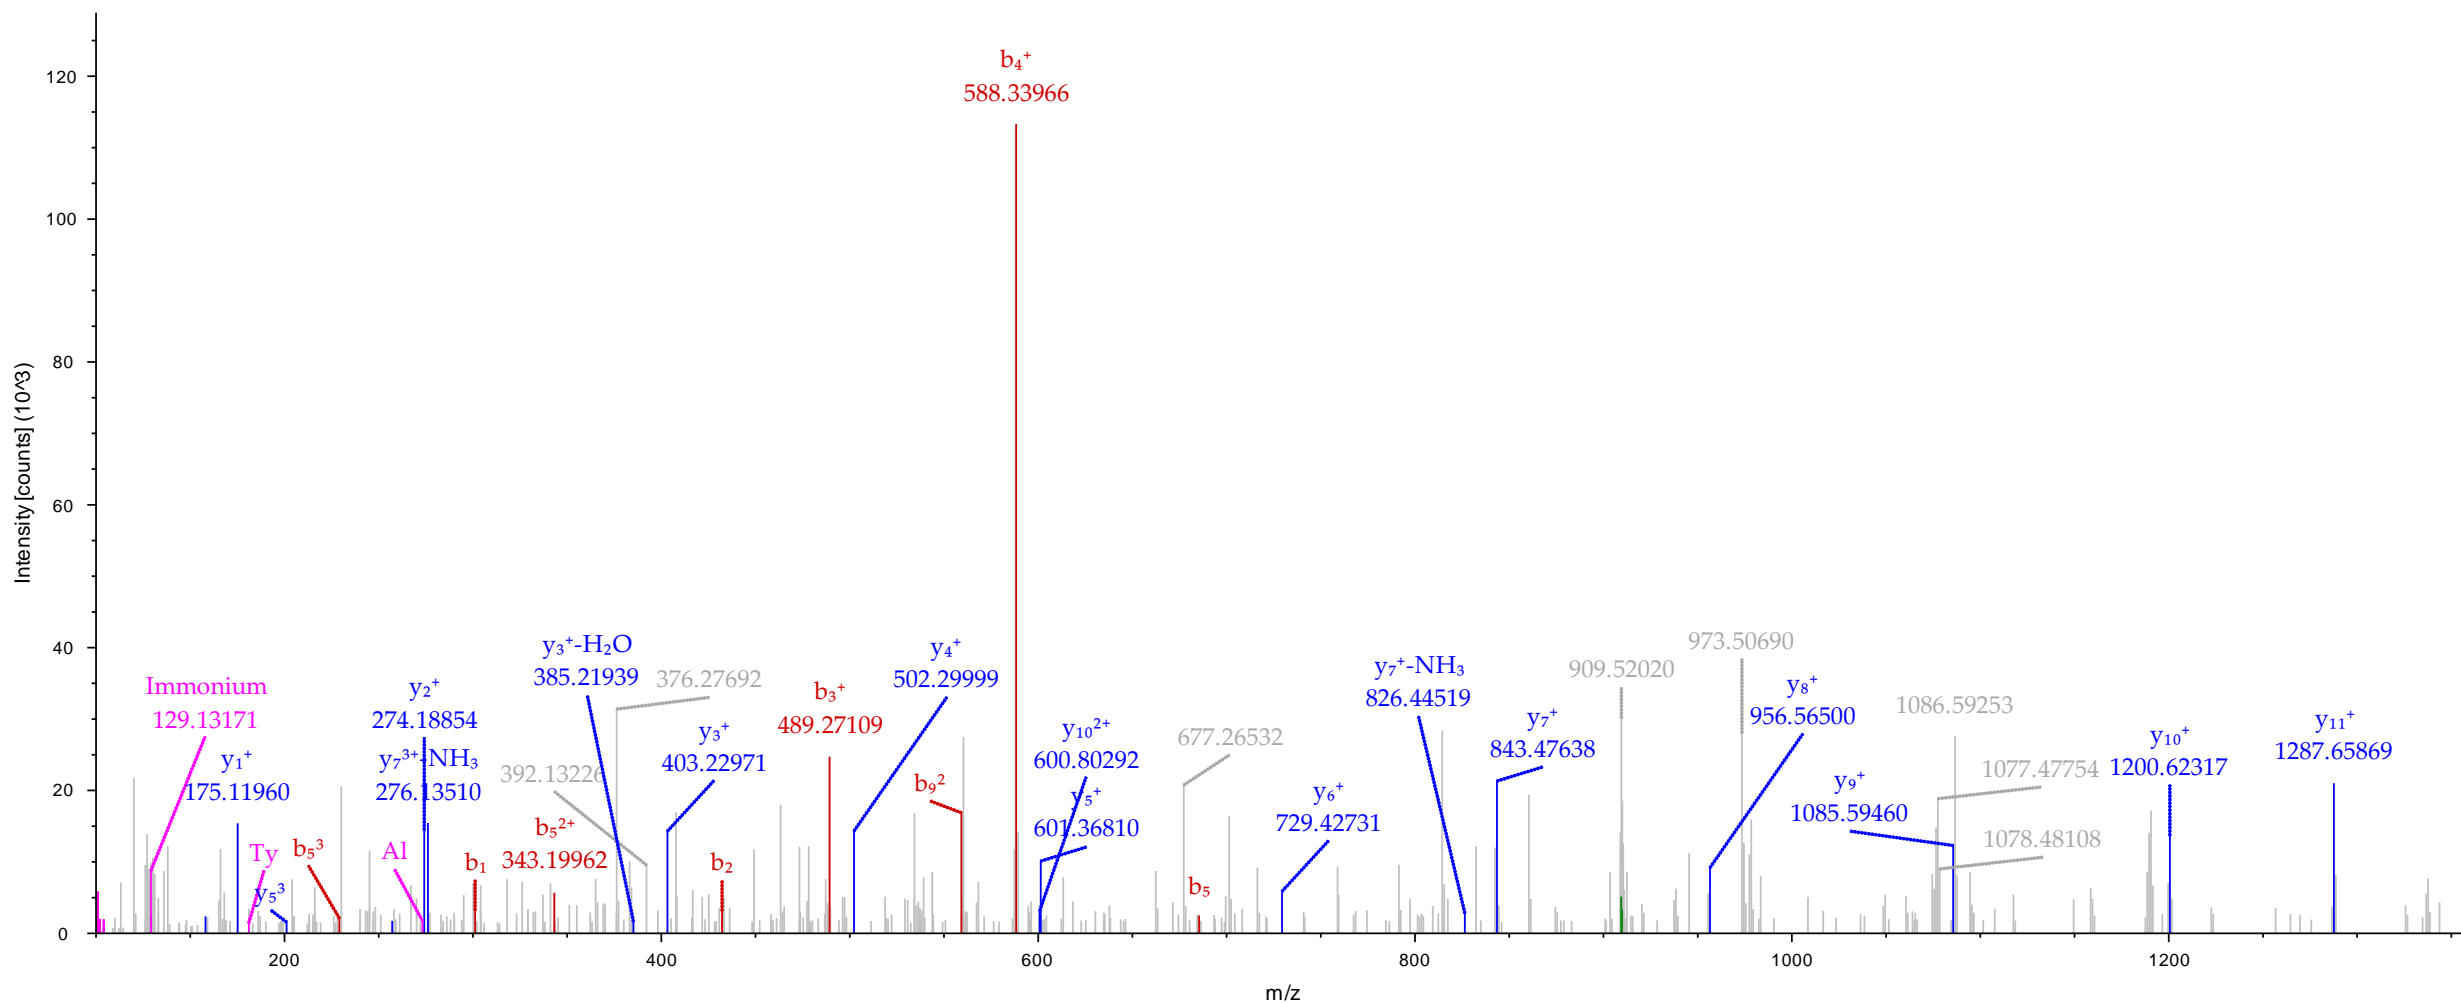

— Pre+H, Precursor, Precursor-H<sub>2</sub>O, Precursor-H<sub>2</sub>O-NH<sub>3</sub>, Precursor-NH<sub>3</sub>, Pre-H  
— y, y-H<sub>2</sub>O, y-NH<sub>3</sub>  
— Immonium  
— b, b-H<sub>2</sub>O, b-NH<sub>3</sub>



| #1 | Immonium  | b <sup>+</sup> | b <sup>2+</sup> | b <sup>3+</sup> | Seq.              | y <sup>+</sup> | y <sup>2+</sup> | y <sup>3+</sup> | #2 |
|----|-----------|----------------|-----------------|-----------------|-------------------|----------------|-----------------|-----------------|----|
| 1  | 331.21789 | 359.21280      | 180.11004       | 120.40912       | E-TMT6plex        |                |                 |                 | 17 |
| 2  | 87.05529  | 473.25573      | 237.13150       | 158.42343       | N                 | 2134.98474     | 1067.99601      | 712.33310       | 16 |
| 3  | 30.03383  | 530.27719      | 265.64223       | 177.43058       | G                 | 2020.94181     | 1010.97454      | 674.31879       | 15 |
| 4  | 133.04301 | 690.30784      | 345.65756       | 230.77413       | C-Carbamidomethyl | 1963.92035     | 982.46381       | 655.31163       | 14 |
| 5  | 120.08078 | 837.37626      | 419.19177       | 279.79694       | F                 | 1803.88970     | 902.44849       | 601.96808       | 13 |
| 6  | 101.07094 | 965.43483      | 483.22105       | 322.48313       | Q                 | 1656.82129     | 828.91428       | 552.94528       | 12 |
| 7  | 101.07094 | 1093.49341     | 547.25034       | 365.16932       | Q                 | 1528.76271     | 764.88499       | 510.25909       | 11 |
| 8  | 60.04439  | 1180.52544     | 590.76636       | 394.18000       | S                 | 1400.70413     | 700.85570       | 467.57289       | 10 |
| 9  | 30.03383  | 1237.54690     | 619.27709       | 413.18715       | G                 | 1313.67210     | 657.33969       | 438.56222       | 9  |
| 10 | 181.06077 | 1445.59531     | 723.30129       | 482.53662       | Y-Nitro           | 1256.65064     | 628.82896       | 419.55506       | 8  |
| 11 | 86.09643  | 1558.67937     | 779.84332       | 520.23131       | L                 | 1048.60223     | 524.80475       | 350.20560       | 7  |
| 12 | 86.09643  | 1671.76344     | 836.38536       | 557.92600       | L                 | 935.51817      | 468.26272       | 312.51091       | 6  |
| 13 | 87.05529  | 1785.80636     | 893.40682       | 595.94031       | N                 | 822.43410      | 411.72069       | 274.81622       | 5  |
| 14 | 87.05529  | 1899.84929     | 950.42828       | 633.95461       | N                 | 708.39118      | 354.69923       | 236.80191       | 4  |
| 15 | 44.04948  | 1970.88640     | 985.94684       | 657.63365       | A                 | 594.34825      | 297.67776       | 198.78760       | 3  |
| 16 | 120.04776 | 2117.92180     | 1059.46454      | 706.64545       | M-Oxidation       | 523.31114      | 262.15921       | 175.10856       | 2  |
| 17 | 330.27026 |                |                 |                 | K-TMT6plex        | 376.27574      | 188.64151       | 126.09676       | 1  |

JM\_NDplasmaBVM\_TMT\_Fr1.raw #40218 RT: 154.5380 min  
 FTMS, 831.4103@hcd35.00, z=+3, Mono m/z=831.41034 Da, MH+=2492.21646 Da, Match Tol.=0.02 Da

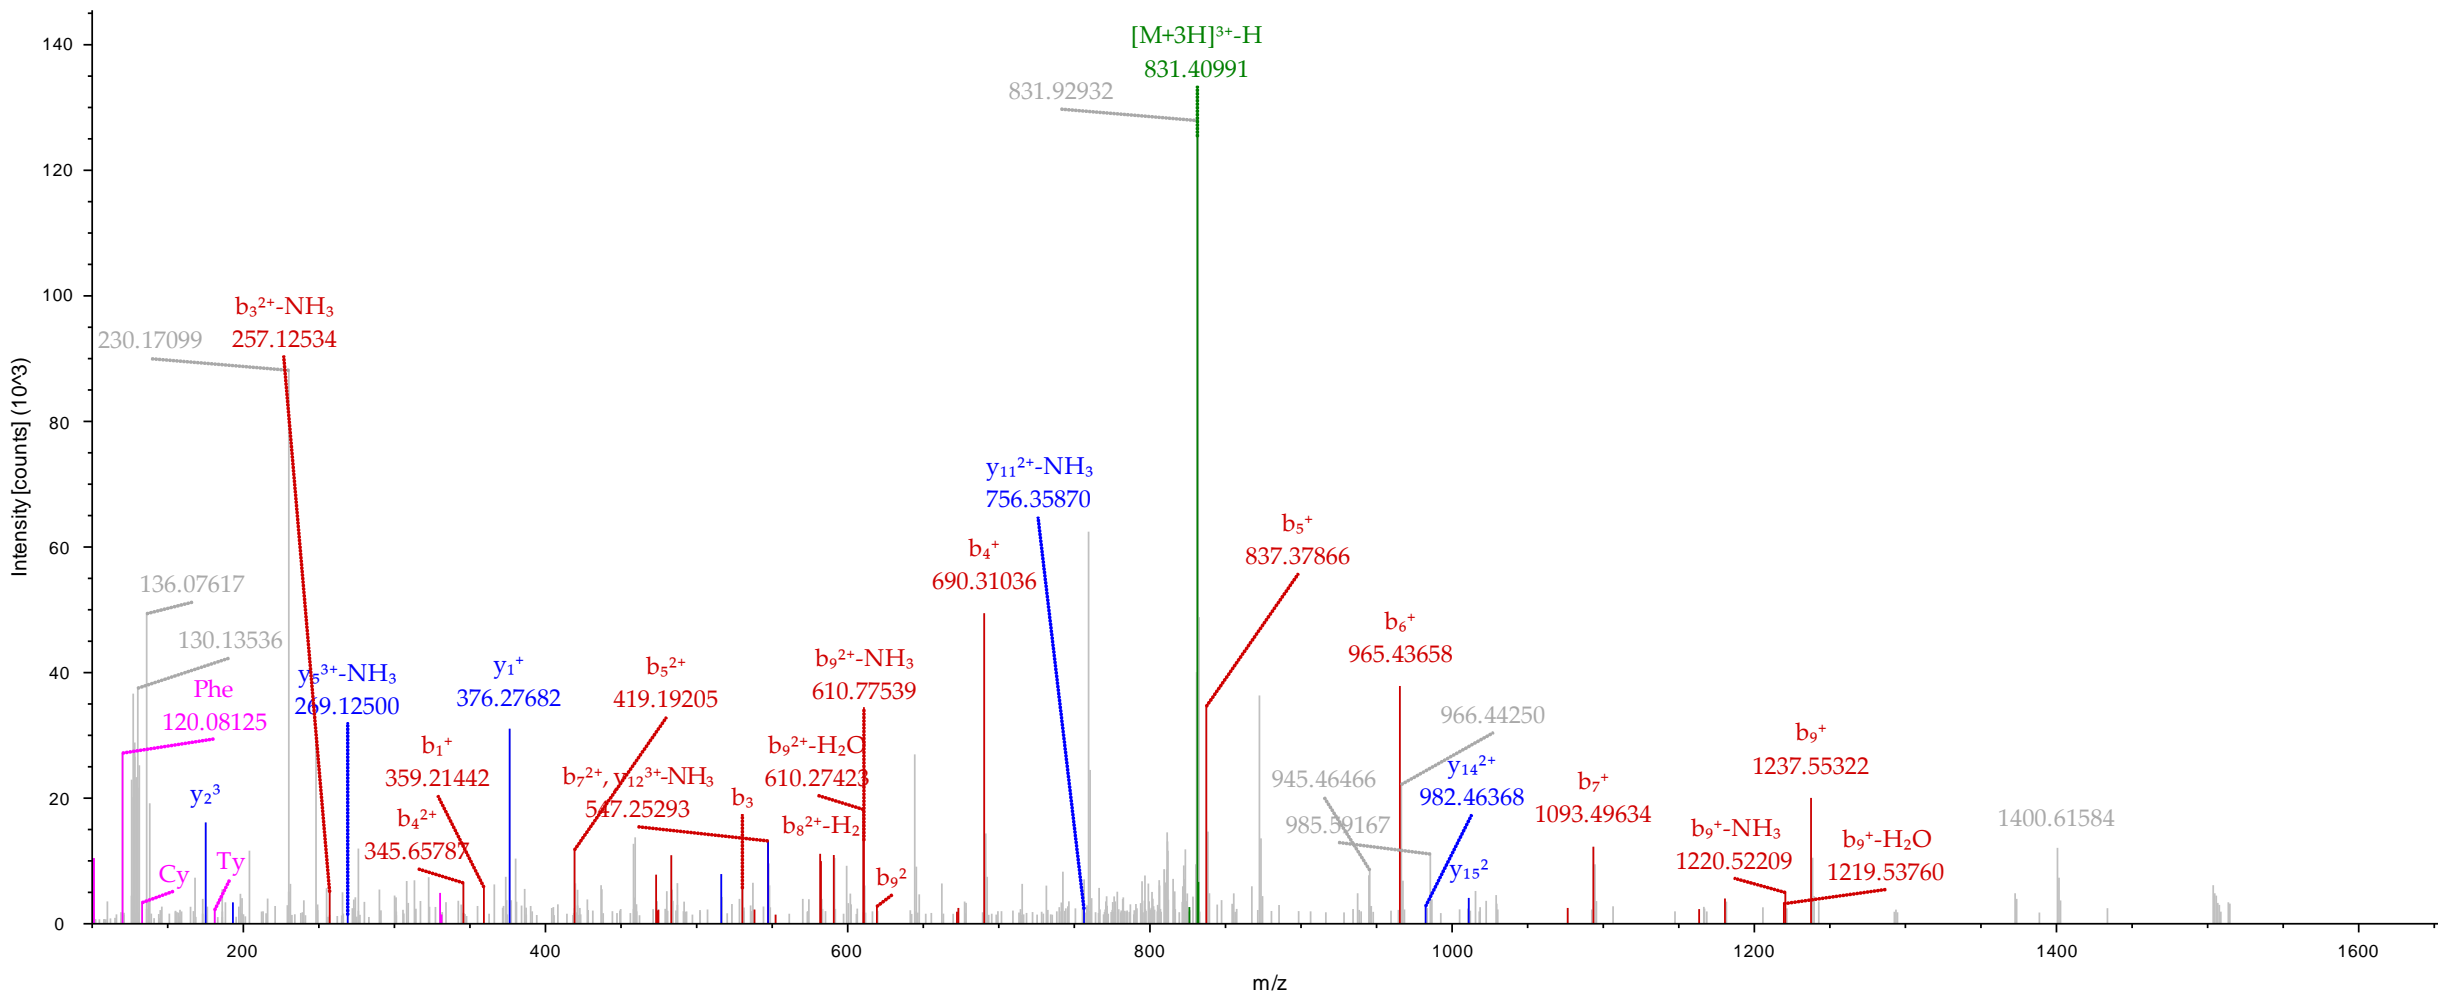

— Pre+H, Precursor, Precursor-H<sub>2</sub>O, Precursor-H<sub>2</sub>O-NH<sub>3</sub>, Precursor-NH<sub>3</sub>, Pre-H  
— Immonium  
— y, y-H<sub>2</sub>O, y-NH<sub>3</sub>  
— b, b-H<sub>2</sub>O, b-NH<sub>3</sub>

| #1 | Immonium                  | b <sup>+</sup>             | b <sup>2+</sup>           | b <sup>3+</sup> | Seq.              | y <sup>+</sup>             | y <sup>2+</sup>           | y <sup>3+</sup>           | #2 |
|----|---------------------------|----------------------------|---------------------------|-----------------|-------------------|----------------------------|---------------------------|---------------------------|----|
| 1  | <a href="#">331.21789</a> | <a href="#">359.21280</a>  | 180.11004                 | 120.40912       | E-TMT6plex        |                            |                           |                           | 33 |
| 2  | <a href="#">101.07094</a> | <a href="#">487.27138</a>  | 244.13933                 | 163.09531       | Q                 | 3732.74461                 | 1866.87594                | 1244.91972                | 32 |
| 3  | 74.06004                  | <a href="#">588.31906</a>  | 294.66317                 | 196.77787       | T                 | 3604.68603                 | 1802.84665                | 1202.23353                | 31 |
| 4  | <a href="#">136.07569</a> | <a href="#">751.38239</a>  | 376.19483                 | 251.13231       | Y                 | 3503.63835                 | 1752.32281                | 1168.55097                | 30 |
| 5  | 87.05529                  | <a href="#">865.42531</a>  | 433.21629                 | 289.14662       | N                 | 3340.57502                 | 1670.79115                | 1114.19653                | 29 |
| 6  | 74.06004                  | <a href="#">966.47299</a>  | <a href="#">483.74013</a> | 322.82918       | T                 | 3226.53210                 | 1613.76969                | 1076.18222                | 28 |
| 7  | 86.09643                  | <a href="#">1079.55706</a> | <a href="#">540.28217</a> | 360.52387       | L                 | 3125.48442                 | 1563.24585                | 1042.49966                | 27 |
| 8  | 86.09643                  | <a href="#">1192.64112</a> | 596.82420                 | 398.21856       | L                 | 3012.40035                 | 1506.70382                | 1004.80497                | 26 |
| 9  | <a href="#">133.04301</a> | <a href="#">1352.67177</a> | 676.83952                 | 451.56211       | C-Carbamidomethyl | 2899.31629                 | 1450.16178                | 967.11028                 | 25 |
| 10 | 70.06513                  | 1449.72453                 | 725.36590                 | 483.91303       | P                 | 2739.28564                 | 1370.14646                | 913.76673                 | 24 |
| 11 | <a href="#">101.07094</a> | 1577.78311                 | 789.39519                 | 526.59922       | Q                 | 2642.23288                 | 1321.62008                | 881.41581                 | 23 |
| 12 | 88.03930                  | 1692.81005                 | 846.90866                 | 564.94154       | D                 | 2514.17430                 | 1257.59079                | 838.72962                 | 22 |
| 13 | 74.06004                  | 1793.85773                 | 897.43250                 | 598.62409       | T                 | 2399.14736                 | 1200.07732                | 800.38730                 | 21 |
| 14 | 102.05496                 | 1922.90032                 | 961.95380                 | 641.63829       | E                 | 2298.09968                 | 1149.55348                | 766.70474                 | 20 |
| 15 | 86.09643                  | 2035.98439                 | 1018.49583                | 679.33298       | L                 | 2169.05709                 | 1085.03218                | 723.69055                 | 19 |
| 16 | <a href="#">101.07094</a> | 2164.04297                 | 1082.52512                | 722.01917       | Q                 | 2055.97302                 | 1028.49015                | 685.99586                 | 18 |
| 17 | 88.03930                  | 2279.06991                 | 1140.03859                | 760.36149       | D                 | 1927.91444                 | 964.46086                 | 643.30967                 | 17 |
| 18 | 87.05529                  | 2393.11284                 | 1197.06006                | 798.37580       | N                 | 1812.88750                 | 906.94739                 | 604.96735                 | 16 |
| 19 | <a href="#">204.07675</a> | 2624.17723                 | 1312.59225                | 875.39726       | W-Nitro           | 1698.84457                 | 849.92593                 | 566.95304                 | 15 |
| 20 | 60.04439                  | 2711.20925                 | 1356.10827                | 904.40794       | S                 | <a href="#">1467.78018</a> | 734.39373                 | 489.93158                 | 14 |
| 21 | 86.09643                  | 2824.29332                 | 1412.65030                | 942.10262       | L                 | 1380.74815                 | 690.87772                 | 460.92090                 | 13 |
| 22 | 102.05496                 | 2953.33591                 | 1477.17159                | 985.11682       | E                 | <a href="#">1267.66409</a> | 634.33568                 | 423.22621                 | 12 |
| 23 | 86.09643                  | 3066.41998                 | 1533.71363                | 1022.81151      | L                 | <a href="#">1138.62150</a> | 569.81439                 | <a href="#">380.21202</a> | 11 |
| 24 | 70.06513                  | 3163.47274                 | 1582.24001                | 1055.16243      | P                 | <a href="#">1025.53743</a> | <a href="#">513.27236</a> | 342.51733                 | 10 |
| 25 | 70.06513                  | 3260.52550                 | 1630.76639                | 1087.51335      | P                 | <a href="#">928.48467</a>  | <a href="#">464.74597</a> | 310.16641                 | 9  |
| 26 | 87.05529                  | 3374.56843                 | 1687.78785                | 1125.52766      | N                 | <a href="#">831.43191</a>  | 416.21959                 | 277.81549                 | 8  |
| 27 | 72.08078                  | 3473.63684                 | 1737.32206                | 1158.55047      | V                 | <a href="#">717.38898</a>  | <a href="#">359.19813</a> | 239.80118                 | 7  |
| 28 | 72.08078                  | 3572.70526                 | 1786.85627                | 1191.57327      | V                 | <a href="#">618.32056</a>  | 309.66392                 | 206.77837                 | 6  |
| 29 | 102.05496                 | 3701.74785                 | 1851.37756                | 1234.58747      | E                 | <a href="#">519.25215</a>  | 260.12971                 | 173.75557                 | 5  |
| 30 | 30.03383                  | 3758.76931                 | 1879.88830                | 1253.59462      | G                 | <a href="#">390.20956</a>  | 195.60842                 | 130.74137                 | 4  |
| 31 | 60.04439                  | 3845.80134                 | 1923.40431                | 1282.60530      | S                 | <a href="#">333.18809</a>  | 167.09769                 | 111.73422                 | 3  |
| 32 | 44.04948                  | 3916.83846                 | 1958.92287                | 1306.28434      | A                 | <a href="#">246.15607</a>  | 123.58167                 | 82.72354                  | 2  |
| 33 | <a href="#">129.11347</a> |                            |                           |                 | R                 | <a href="#">175.11895</a>  | 88.06311                  | 59.04450                  | 1  |

JM\_NDplasmaBVM\_TMT\_NoFrac.raw #133912 RT: 357.4438 min  
 FTMS, 1364.6685@hcd35.00, z=+3, Mono m/z=1364.32666 Da, MH+=4090.96543 Da, Match Tol.=0.02 Da

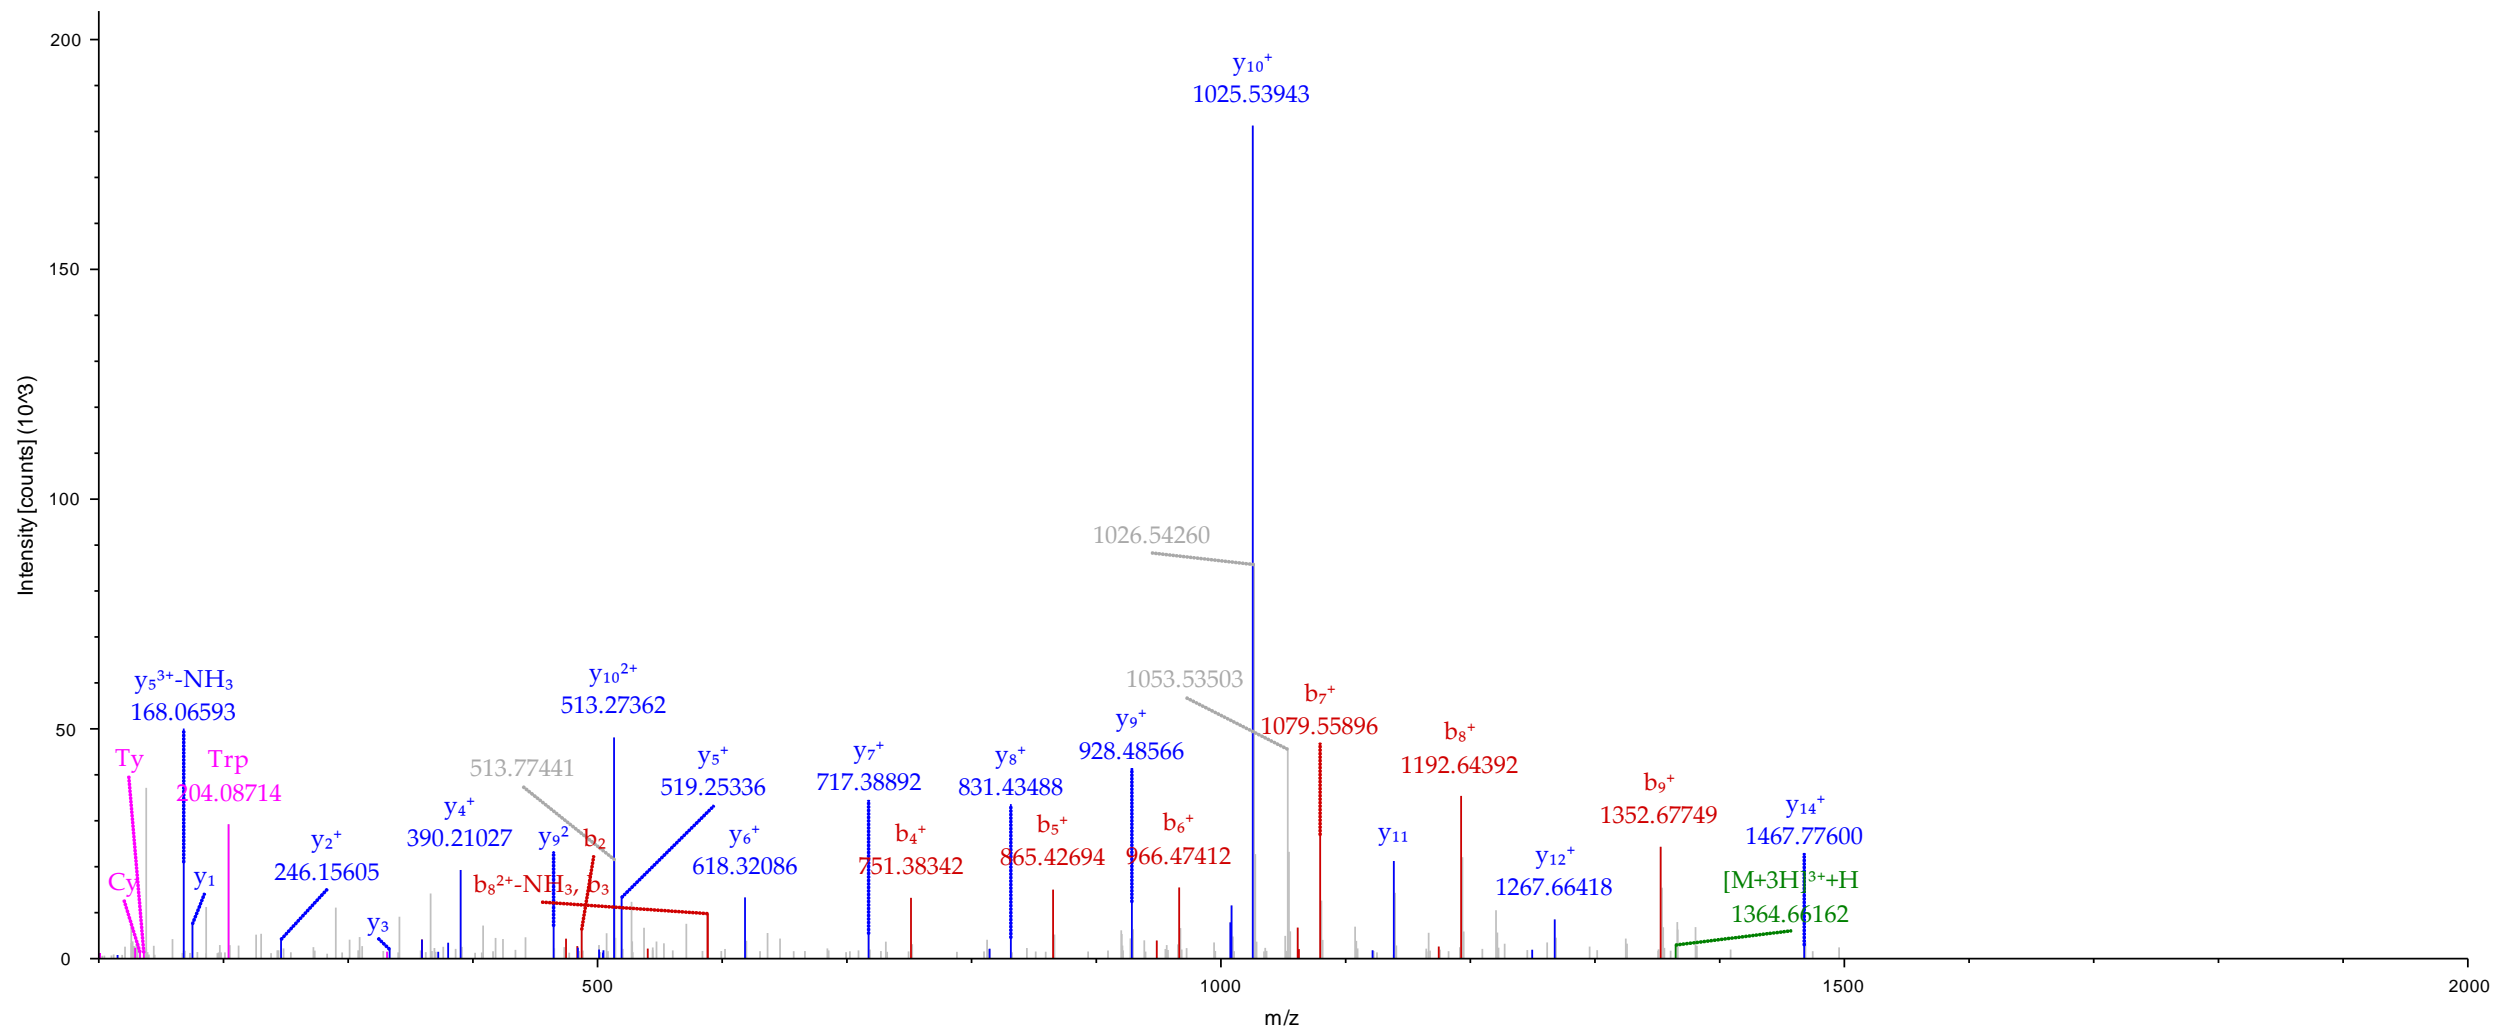

— Pre+H, Precursor, Precursor-H<sub>2</sub>O, Precursor-H<sub>2</sub>O-NH<sub>3</sub>, Precursor-NH<sub>3</sub>, Pre-H  
— y, y-H<sub>2</sub>O, y-NH<sub>3</sub>  
— Immonium  
— b, b-H<sub>2</sub>O, b-NH<sub>3</sub>

| #1 | Immonium  | b <sup>+</sup> | b <sup>2+</sup> | b <sup>3+</sup> | Seq.         | y <sup>+</sup> | y <sup>2+</sup> | y <sup>3+</sup> | #2 |
|----|-----------|----------------|-----------------|-----------------|--------------|----------------|-----------------|-----------------|----|
| 1  | 349.24371 | 377.23862      | 189.12295       | 126.41773       | F-TMT6plex   |                |                 |                 | 31 |
| 2  | 133.04301 | 537.26927      | 269.13827       | 179.76127       | Carbamidomet | 3152.43128     | 1576.71928      | 1051.48194      | 30 |
| 3  | 101.07094 | 665.32785      | 333.16756       | 222.44747       | Q            | 2992.40063     | 1496.70395      | 998.13839       | 29 |
| 4  | 102.05496 | 794.37044      | 397.68886       | 265.46166       | E            | 2864.34205     | 1432.67466      | 955.45220       | 28 |
| 5  | 120.08078 | 941.43886      | 471.22307       | 314.48447       | F            | 2735.29946     | 1368.15337      | 912.43800       | 27 |
| 6  | 101.07094 | 1069.49743     | 535.25235       | 357.17066       | Q            | 2588.23104     | 1294.61916      | 863.41520       | 26 |
| 7  | 110.07127 | 1206.55634     | 603.78181       | 402.85697       | H            | 2460.17247     | 1230.58987      | 820.72901       | 25 |
| 8  | 181.06077 | 1414.60475     | 707.80601       | 472.20643       | Y-Nitro      | 2323.11356     | 1162.06042      | 775.04270       | 24 |
| 9  | 70.06513  | 1511.65751     | 756.33240       | 504.55736       | P            | 2115.06515     | 1058.03621      | 705.69323       | 23 |
| 10 | 44.04948  | 1582.69463     | 791.85095       | 528.23639       | A            | 2018.01238     | 1009.50983      | 673.34231       | 22 |
| 11 | 120.04776 | 1729.73003     | 865.36865       | 577.24819       | M-Oxidation  | 1946.97527     | 973.99127       | 649.66327       | 21 |
| 12 | 30.03383  | 1786.75149     | 893.87938       | 596.25535       | G            | 1799.93987     | 900.47357       | 600.65147       | 20 |
| 13 | 30.03383  | 1843.77296     | 922.39012       | 615.26250       | G            | 1742.91841     | 871.96284       | 581.64432       | 19 |
| 14 | 72.08078  | 1942.84137     | 971.92432       | 648.28531       | V            | 1685.89694     | 843.45211       | 562.63717       | 18 |
| 15 | 44.04948  | 2013.87848     | 1007.44288      | 671.96435       | A            | 1586.82853     | 793.91790       | 529.61436       | 17 |
| 16 | 70.06513  | 2110.93125     | 1055.96926      | 704.31527       | P            | 1515.79142     | 758.39935       | 505.93532       | 16 |
| 17 | 101.07094 | 2238.98982     | 1119.99855      | 747.00146       | Q            | 1418.73865     | 709.87296       | 473.58440       | 15 |
| 18 | 44.04948  | 2310.02694     | 1155.51711      | 770.68050       | A            | 1290.68008     | 645.84368       | 430.89821       | 14 |
| 19 | 86.09643  | 2423.11100     | 1212.05914      | 808.37519       | L            | 1219.64296     | 610.32512       | 407.21917       | 13 |
| 20 | 44.04948  | 2494.14812     | 1247.57770      | 832.05422       | A            | 1106.55890     | 553.78309       | 369.52448       | 12 |
| 21 | 72.08078  | 2593.21653     | 1297.11190      | 865.07703       | V            | 1035.52178     | 518.26453       | 345.84545       | 11 |
| 22 | 44.04948  | 2664.25364     | 1332.63046      | 888.75607       | A            | 936.45337      | 468.73032       | 312.82264       | 10 |
| 23 | 44.04948  | 2735.29076     | 1368.14902      | 912.43510       | A            | 865.41626      | 433.21177       | 289.14360       | 9  |
| 24 | 60.04439  | 2822.32279     | 1411.66503      | 941.44578       | S            | 794.37914      | 397.69321       | 265.46457       | 8  |
| 25 | 30.03383  | 2879.34425     | 1440.17576      | 960.45293       | G            | 707.34711      | 354.17720       | 236.45389       | 7  |
| 26 | 70.06513  | 2976.39701     | 1488.70214      | 992.80386       | P            | 650.32565      | 325.66646       | 217.44673       | 6  |
| 27 | 30.03383  | 3033.41848     | 1517.21288      | 1011.81101      | G            | 553.27289      | 277.14008       | 185.09581       | 5  |
| 28 | 60.04439  | 3120.45051     | 1560.72889      | 1040.82169      | S            | 496.25142      | 248.62935       | 166.08866       | 4  |
| 29 | 60.04439  | 3207.48253     | 1604.24491      | 1069.83236      | S            | 409.21939      | 205.11334       | 137.07798       | 3  |
| 30 | 120.08078 | 3354.55095     | 1677.77911      | 1118.85517      | F            | 322.18737      | 161.59732       | 108.06731       | 2  |
| 31 | 129.11347 |                |                 |                 | R            | 175.11895      | 88.06311        | 59.04450        | 1  |

Nitro-Tyr immonium ion is detected in MS/MS spectra and added brown colored in the following spectrum

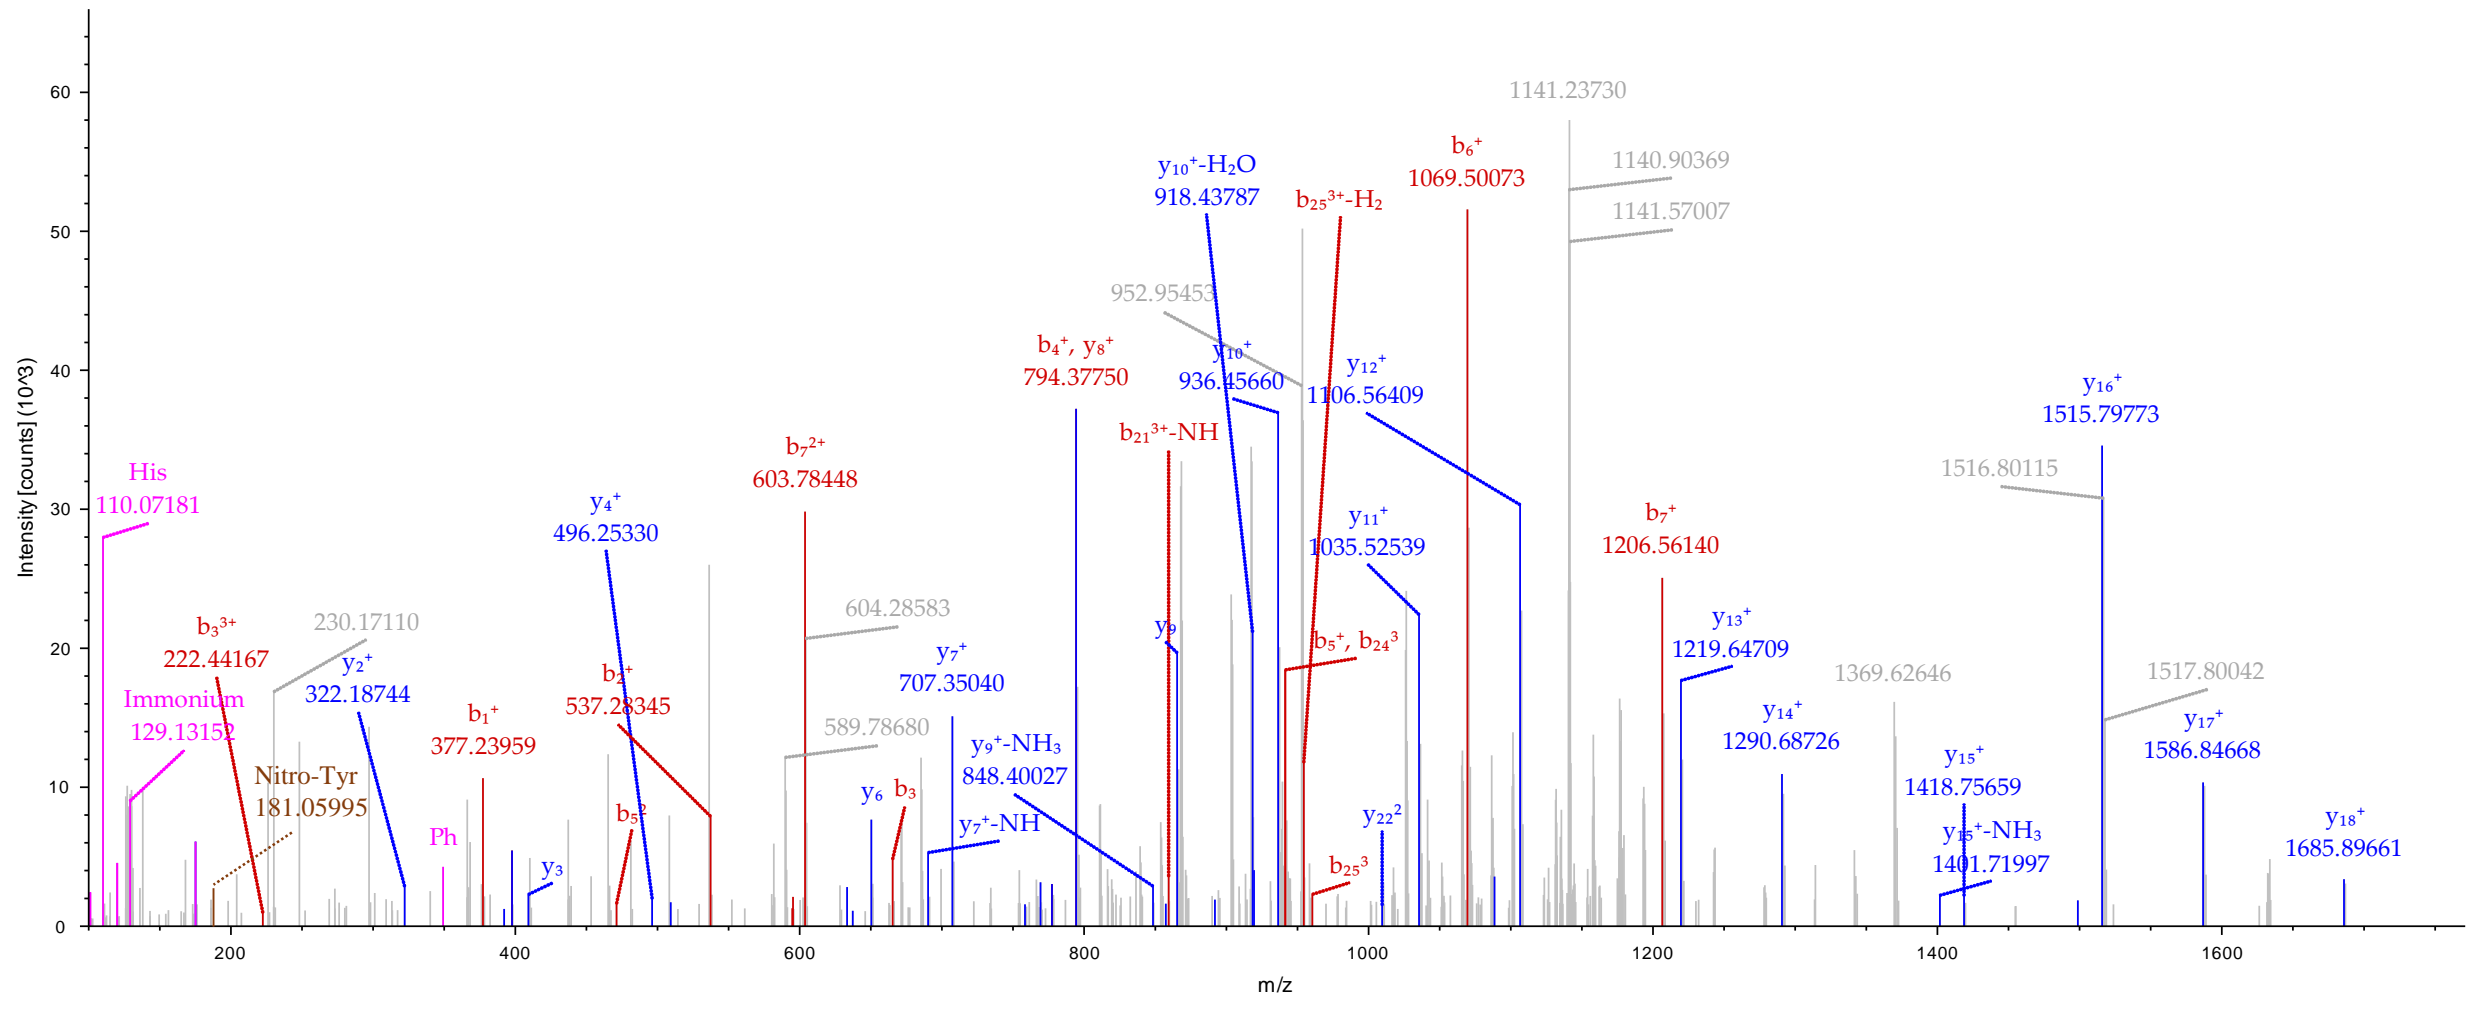

- Pre+H, Precursor, Precursor-H<sub>2</sub>O, Precursor-H<sub>2</sub>O-NH<sub>3</sub>, Precursor-NH<sub>3</sub>, Pre-H
- Immonium
- y, y-H<sub>2</sub>O, y-NH<sub>3</sub>
- b, b-H<sub>2</sub>O, b-NH<sub>3</sub>

| #1 | Immonium  | b <sup>+</sup> | b <sup>2+</sup> | b <sup>3+</sup> | b <sup>4+</sup> | Seq.        | y <sup>+</sup> | y <sup>2+</sup> | y <sup>3+</sup> | y <sup>4+</sup> | #2 |
|----|-----------|----------------|-----------------|-----------------|-----------------|-------------|----------------|-----------------|-----------------|-----------------|----|
| 1  | 259.19676 | 287.19167      | 144.09947       | 96.40208        | 72.55338        | G-TMT6plex  |                |                 |                 |                 | 30 |
| 2  | 30.03383  | 344.21314      | 172.61021       | 115.40923       | 86.80874        | G           | 3171.62421     | 1586.31574      | 1057.87959      | 793.66151       | 29 |
| 3  | 72.08078  | 443.28155      | 222.14441       | 148.43203       | 111.57584       | V           | 3114.60274     | 1557.80501      | 1038.87243      | 779.40614       | 28 |
| 4  | 88.03930  | 558.30849      | 279.65788       | 186.77435       | 140.33258       | D           | 3015.53433     | 1508.27080      | 1005.84963      | 754.63904       | 27 |
| 5  | 88.03930  | 673.33544      | 337.17136       | 225.11666       | 169.08932       | D           | 2900.50739     | 1450.75733      | 967.50731       | 725.88230       | 26 |
| 6  | 102.05496 | 802.37803      | 401.69265       | 268.13086       | 201.34996       | E           | 2785.48044     | 1393.24386      | 929.16500       | 697.12557       | 25 |
| 7  | 72.08078  | 901.44644      | 451.22686       | 301.15367       | 226.11707       | V           | 2656.43785     | 1328.72256      | 886.15080       | 664.86492       | 24 |
| 8  | 74.06004  | 1002.49412     | 501.75070       | 334.83622       | 251.37899       | T           | 2557.36944     | 1279.18836      | 853.12800       | 640.09782       | 23 |
| 9  | 86.09643  | 1115.57819     | 558.29273       | 372.53091       | 279.65000       | L           | 2456.32176     | 1228.66452      | 819.44544       | 614.83590       | 22 |
| 10 | 60.04439  | 1202.61021     | 601.80874       | 401.54159       | 301.40801       | S           | 2343.23769     | 1172.12248      | 781.75075       | 586.56488       | 21 |
| 11 | 44.04948  | 1273.64733     | 637.32730       | 425.22063       | 319.16729       | A           | 2256.20566     | 1128.60647      | 752.74007       | 564.80687       | 20 |
| 12 | 181.06077 | 1481.69573     | 741.35151       | 494.57010       | 371.17939       | Y-Nitro     | 2185.16855     | 1093.08791      | 729.06103       | 547.04760       | 19 |
| 13 | 86.09643  | 1594.77980     | 797.89354       | 532.26478       | 399.45041       | I           | 1977.12014     | 989.06371       | 659.71157       | 495.03549       | 18 |
| 14 | 74.06004  | 1695.82748     | 848.41738       | 565.94734       | 424.71233       | T           | 1864.03608     | 932.52168       | 622.01688       | 466.76448       | 17 |
| 15 | 86.09643  | 1808.91154     | 904.95941       | 603.64203       | 452.98334       | I           | 1762.98840     | 881.99784       | 588.33432       | 441.50256       | 16 |
| 16 | 44.04948  | 1879.94865     | 940.47797       | 627.32107       | 470.74262       | A           | 1649.90434     | 825.45581       | 550.63963       | 413.23154       | 15 |
| 17 | 86.09643  | 1993.03272     | 997.02000       | 665.01576       | 499.01364       | L           | 1578.86722     | 789.93725       | 526.96059       | 395.47226       | 14 |
| 18 | 86.09643  | 2106.11678     | 1053.56203      | 702.71044       | 527.28465       | L           | 1465.78316     | 733.39522       | 489.26590       | 367.20125       | 13 |
| 19 | 102.05496 | 2235.15937     | 1118.08333      | 745.72464       | 559.54530       | E           | 1352.69910     | 676.85319       | 451.57122       | 338.93023       | 12 |
| 20 | 120.04776 | 2382.19477     | 1191.60103      | 794.73644       | 596.30415       | M-Oxidation | 1223.65650     | 612.33189       | 408.55702       | 306.66958       | 11 |
| 21 | 70.06513  | 2479.24754     | 1240.12741      | 827.08736       | 620.56734       | P           | 1076.62110     | 538.81419       | 359.54522       | 269.91073       | 10 |
| 22 | 86.09643  | 2592.33160     | 1296.66944      | 864.78205       | 648.83836       | I           | 979.56834      | 490.28781       | 327.19430       | 245.64754       | 9  |
| 23 | 70.06513  | 2689.38437     | 1345.19582      | 897.13297       | 673.10155       | P           | 866.48428      | 433.74578       | 289.49961       | 217.37653       | 8  |
| 24 | 72.08078  | 2788.45278     | 1394.73003      | 930.15578       | 697.86865       | V           | 769.43151      | 385.21939       | 257.14869       | 193.11334       | 7  |
| 25 | 74.06004  | 2889.50046     | 1445.25387      | 963.83834       | 723.13057       | T           | 670.36310      | 335.68519       | 224.12588       | 168.34623       | 6  |
| 26 | 110.07127 | 3026.55937     | 1513.78332      | 1009.52464      | 757.39530       | H           | 569.31542      | 285.16135       | 190.44332       | 143.08431       | 5  |
| 27 | 60.04439  | 3113.59140     | 1557.29934      | 1038.53532      | 779.15331       | S           | 432.25651      | 216.63189       | 144.75702       | 108.81958       | 4  |
| 28 | 44.04948  | 3184.62851     | 1592.81789      | 1062.21436      | 796.91259       | A           | 345.22448      | 173.11588       | 115.74634       | 87.06158        | 3  |
| 29 | 72.08078  | 3283.69693     | 1642.35210      | 1095.23716      | 821.67969       | V           | 274.18737      | 137.59732       | 92.06731        | 69.30230        | 2  |
| 30 | 129.11347 |                |                 |                 |                 | R           | 175.11895      | 88.06311        | 59.04450        | 44.53520        | 1  |





| #1 | Immonium  | b <sup>+</sup> | b <sup>2+</sup> | b <sup>3+</sup> | Seq.       | y <sup>+</sup> | y <sup>2+</sup> | y <sup>3+</sup> | #2 |
|----|-----------|----------------|-----------------|-----------------|------------|----------------|-----------------|-----------------|----|
| 1  | 315.25936 | 343.25427      | 172.13077       | 115.08961       | L-TMT6plex |                |                 |                 | 13 |
| 2  | 60.04439  | 430.28630      | 215.64679       | 144.10028       | S          | 1590.86889     | 795.93808       | 530.96115       | 12 |
| 3  | 70.06513  | 527.33906      | 264.17317       | 176.45121       | P          | 1503.83686     | 752.42207       | 501.95047       | 11 |
| 4  | 101.07094 | 655.39764      | 328.20246       | 219.13740       | Q          | 1406.78410     | 703.89569       | 469.59955       | 10 |
| 5  | 60.04439  | 742.42967      | 371.71847       | 248.14807       | S          | 1278.72552     | 639.86640       | 426.91336       | 9  |
| 6  | 86.09643  | 855.51373      | 428.26051       | 285.84276       | I          | 1191.69349     | 596.35038       | 397.90268       | 8  |
| 7  | 181.06077 | 1063.56214     | 532.28471       | 355.19223       | Y-Nitro    | 1078.60943     | 539.80835       | 360.20799       | 7  |
| 8  | 87.05529  | 1177.60507     | 589.30617       | 393.20654       | N          | 870.56102      | 435.78415       | 290.85852       | 6  |
| 9  | 86.09643  | 1290.68913     | 645.84820       | 430.90123       | L          | 756.51809      | 378.76268       | 252.84421       | 5  |
| 10 | 86.09643  | 1403.77320     | 702.39024       | 468.59592       | L          | 643.43403      | 322.22065       | 215.14953       | 4  |
| 11 | 70.06513  | 1500.82596     | 750.91662       | 500.94684       | P          | 530.34996      | 265.67862       | 177.45484       | 3  |
| 12 | 30.03383  | 1557.84742     | 779.42735       | 519.95399       | G          | 433.29720      | 217.15224       | 145.10392       | 2  |
| 13 | 330.27026 |                |                 |                 | K-TMT6plex | 376.27574      | 188.64151       | 126.09676       | 1  |

Nitro-Tyr immonium ion is detected in MS/MS spectra and added brown colored in the following spectrum

JM\_NDplasmaBVM\_TMT\_Fr4\_20171103150556.raw #76324 RT: 241.2616 min  
 FTMS, 645.4023@hcd35.00, z=+3, Mono m/z=645.06775 Da, MH+=1933.18869 Da, Match Tol.=0.02 Da

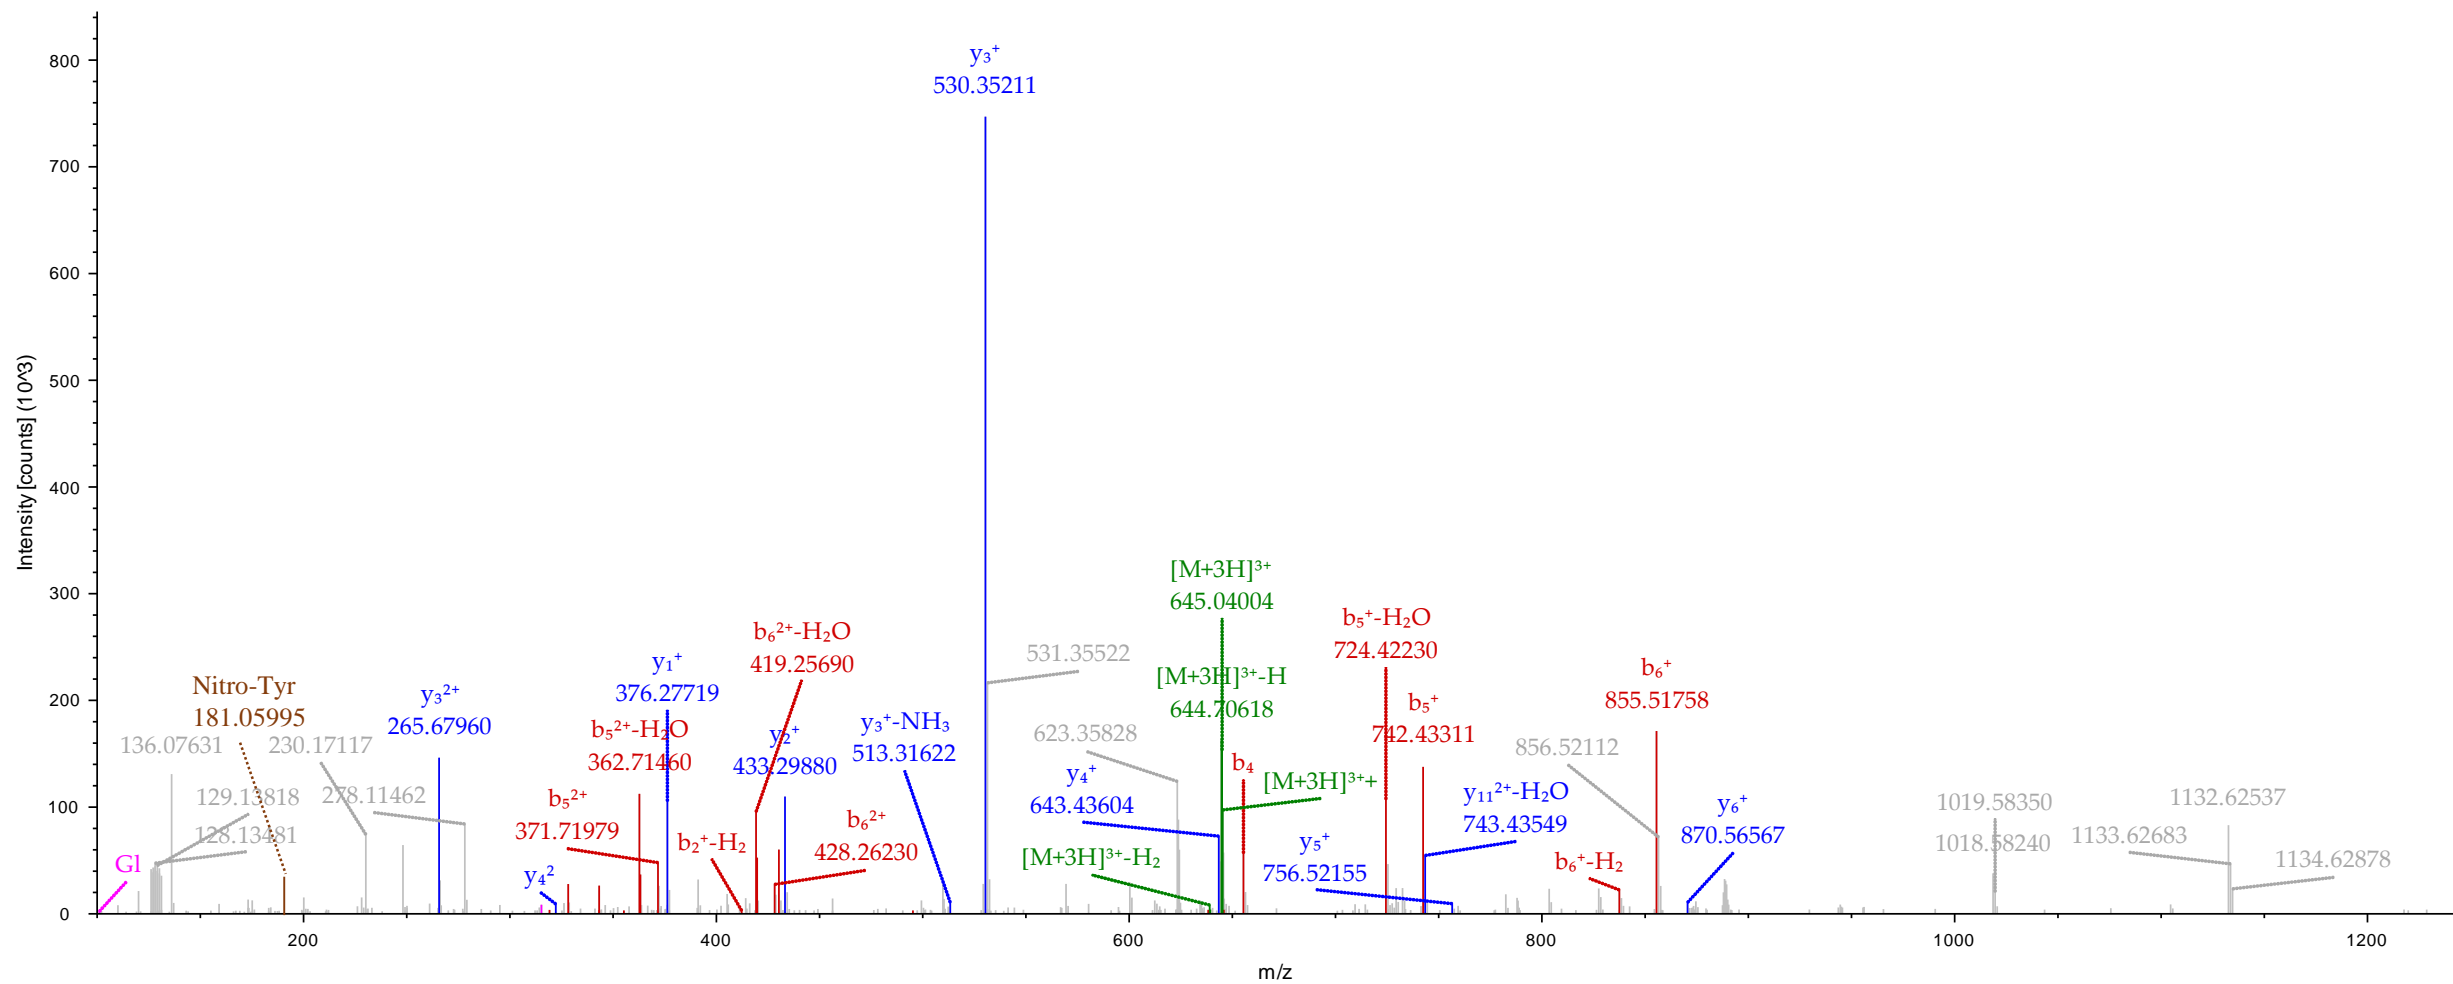

— Pre+H, Precursor, Precursor-H<sub>2</sub>O, Precursor-H<sub>2</sub>O-NH<sub>3</sub>, Precursor-NH<sub>3</sub>, Pre-H    — Immonium  
— y, y-H<sub>2</sub>O, y-NH<sub>3</sub>    — b, b-H<sub>2</sub>O, b-NH<sub>3</sub>

| #1 | Immonium  | b <sup>+</sup> | b <sup>2+</sup> | b <sup>3+</sup> | b <sup>4+</sup> | b <sup>5+</sup> | Seq.              | y <sup>+</sup> | y <sup>2+</sup> | y <sup>3+</sup> | y <sup>4+</sup> | y <sup>5+</sup> | #2 |
|----|-----------|----------------|-----------------|-----------------|-----------------|-----------------|-------------------|----------------|-----------------|-----------------|-----------------|-----------------|----|
| 1  | 303.22297 | 331.21789      | 166.11258       | 111.07748       | 83.55993        | 67.04940        | T-TMT6plex        |                |                 |                 |                 |                 | 34 |
| 2  | 72.08078  | 430.28630      | 215.64679       | 144.10028       | 108.32703       | 86.86308        | V                 | 4195.09590     | 2098.05159      | 1399.03682      | 1049.52943      | 839.82500       | 33 |
| 3  | 101.07094 | 558.34488      | 279.67608       | 186.78648       | 140.34168       | 112.47480       | Q                 | 4096.02748     | 2048.51738      | 1366.01401      | 1024.76233      | 820.01132       | 32 |
| 4  | 30.03383  | 615.36634      | 308.18681       | 205.79363       | 154.59704       | 123.87909       | G                 | 3967.96891     | 1984.48809      | 1323.32782      | 992.74768       | 794.39960       | 31 |
| 5  | 44.04948  | 686.40346      | 343.70537       | 229.47267       | 172.35632       | 138.08651       | A                 | 3910.94744     | 1955.97736      | 1304.32067      | 978.49232       | 782.99531       | 30 |
| 6  | 120.08078 | 833.47187      | 417.23957       | 278.49547       | 209.12342       | 167.50020       | F                 | 3839.91033     | 1920.45880      | 1280.64163      | 960.73304       | 768.78789       | 29 |
| 7  | 120.08078 | 980.54028      | 490.77378       | 327.51828       | 245.89053       | 196.91388       | F                 | 3692.84192     | 1846.92460      | 1231.61882      | 923.96594       | 739.37420       | 28 |
| 8  | 30.03383  | 1037.56175     | 519.28451       | 346.52543       | 260.14589       | 208.31817       | G                 | 3545.77350     | 1773.39039      | 1182.59602      | 887.19883       | 709.96052       | 27 |
| 9  | 72.08078  | 1136.63016     | 568.81872       | 379.54824       | 284.91300       | 228.13185       | V                 | 3488.75204     | 1744.87966      | 1163.58886      | 872.94347       | 698.55623       | 26 |
| 10 | 70.06513  | 1233.68292     | 617.34510       | 411.89916       | 309.17619       | 247.54241       | P                 | 3389.68362     | 1695.34545      | 1130.56606      | 848.17636       | 678.74255       | 25 |
| 11 | 72.08078  | 1332.75134     | 666.87931       | 444.92196       | 333.94329       | 267.35609       | V                 | 3292.63086     | 1646.81907      | 1098.21514      | 823.91317       | 659.33199       | 24 |
| 12 | 181.06077 | 1540.79975     | 770.90351       | 514.27143       | 385.95539       | 308.96577       | Y-Nitro           | 3193.56245     | 1597.28486      | 1065.19233      | 799.14607       | 639.51831       | 23 |
| 13 | 330.27026 | 1898.05764     | 949.53246       | 633.35740       | 475.26987       | 380.41735       | K-TMT6plex        | 2985.51404     | 1493.26066      | 995.84286       | 747.13397       | 597.90863       | 22 |
| 14 | 88.03930  | 2013.08458     | 1007.04593      | 671.69971       | 504.02660       | 403.42274       | D                 | 2628.25615     | 1314.63171      | 876.75690       | 657.81949       | 526.45705       | 21 |
| 15 | 110.07127 | 2150.14349     | 1075.57539      | 717.38602       | 538.29133       | 430.83452       | H                 | 2513.22920     | 1257.11824      | 838.41459       | 629.06276       | 503.45166       | 20 |
| 16 | 102.05496 | 2279.18609     | 1140.09668      | 760.40021       | 570.55198       | 456.64304       | E                 | 2376.17029     | 1188.58878      | 792.72828       | 594.79803       | 476.03988       | 19 |
| 17 | 87.05529  | 2393.22902     | 1197.11815      | 798.41452       | 599.06271       | 479.45162       | N                 | 2247.12770     | 1124.06749      | 749.71408       | 562.53738       | 450.23136       | 18 |
| 18 | 133.04301 | 2553.25966     | 1277.13347      | 851.75807       | 639.07037       | 511.45775       | C-Carbamidomethyl | 2133.08477     | 1067.04602      | 711.69977       | 534.02665       | 427.42278       | 17 |
| 19 | 86.09643  | 2666.34373     | 1333.67550      | 889.45276       | 667.34139       | 534.07457       | I                 | 1973.05412     | 987.03070       | 658.35623       | 494.01899       | 395.41665       | 16 |
| 20 | 60.04439  | 2753.37576     | 1377.19152      | 918.46344       | 689.09940       | 551.48097       | S                 | 1859.97006     | 930.48867       | 620.66154       | 465.74797       | 372.79983       | 15 |
| 21 | 30.03383  | 2810.39722     | 1405.70225      | 937.47059       | 703.35476       | 562.88527       | G                 | 1772.93803     | 886.97265       | 591.65086       | 443.98996       | 355.39343       | 14 |
| 22 | 102.05496 | 2939.43981     | 1470.22354      | 980.48479       | 735.61541       | 588.69378       | E                 | 1715.91657     | 858.46192       | 572.64371       | 429.73460       | 343.98913       | 13 |
| 23 | 88.03930  | 3054.46676     | 1527.73702      | 1018.82710      | 764.37215       | 611.69917       | D                 | 1586.87397     | 793.94062       | 529.62951       | 397.47395       | 318.18062       | 12 |
| 24 | 86.09643  | 3167.55082     | 1584.27905      | 1056.52179      | 792.64316       | 634.31599       | I                 | 1471.84703     | 736.42715       | 491.28719       | 368.71721       | 295.17523       | 11 |
| 25 | 74.06004  | 3268.59850     | 1634.80289      | 1090.20435      | 817.90508       | 654.52552       | T                 | 1358.76297     | 679.88512       | 453.59251       | 340.44620       | 272.55841       | 10 |
| 26 | 110.07127 | 3405.65741     | 1703.33234      | 1135.89065      | 852.16981       | 681.93730       | H                 | 1257.71529     | 629.36128       | 419.90995       | 315.18428       | 252.34888       | 9  |
| 27 | 87.05529  | 3519.70034     | 1760.35381      | 1173.90496      | 880.68054       | 704.74589       | N                 | 1120.65638     | 560.83183       | 374.22364       | 280.91955       | 224.93710       | 8  |
| 28 | 30.03383  | 3576.72180     | 1788.86454      | 1192.91212      | 894.93591       | 716.15018       | G                 | 1006.61345     | 503.81036       | 336.20933       | 252.40882       | 202.12851       | 7  |
| 29 | 86.09643  | 3689.80586     | 1845.40657      | 1230.60681      | 923.20692       | 738.76699       | I                 | 949.59198      | 475.29963       | 317.20218       | 238.15345       | 190.72422       | 6  |
| 30 | 72.08078  | 3788.87428     | 1894.94078      | 1263.62961      | 947.97403       | 758.58068       | V                 | 836.50792      | 418.75760       | 279.50749       | 209.88244       | 168.10741       | 5  |
| 31 | 136.07569 | 3951.93761     | 1976.47244      | 1317.98405      | 988.73986       | 791.19334       | Y                 | 737.43951      | 369.22339       | 246.48469       | 185.11533       | 148.29372       | 4  |
| 32 | 74.06004  | 4052.98529     | 2026.99628      | 1351.66661      | 1014.00178      | 811.40288       | T                 | 574.37618      | 287.69173       | 192.13024       | 144.34950       | 115.68106       | 3  |
| 33 | 70.06513  | 4150.03805     | 2075.52266      | 1384.01753      | 1038.26497      | 830.81343       | P                 | 473.32850      | 237.16789       | 158.44768       | 119.08758       | 95.47152        | 2  |
| 34 | 330.27026 |                |                 |                 |                 |                 | K-TMT6plex        | 376.27574      | 188.64151       | 126.09676       | 94.82439        | 76.06097        | 1  |

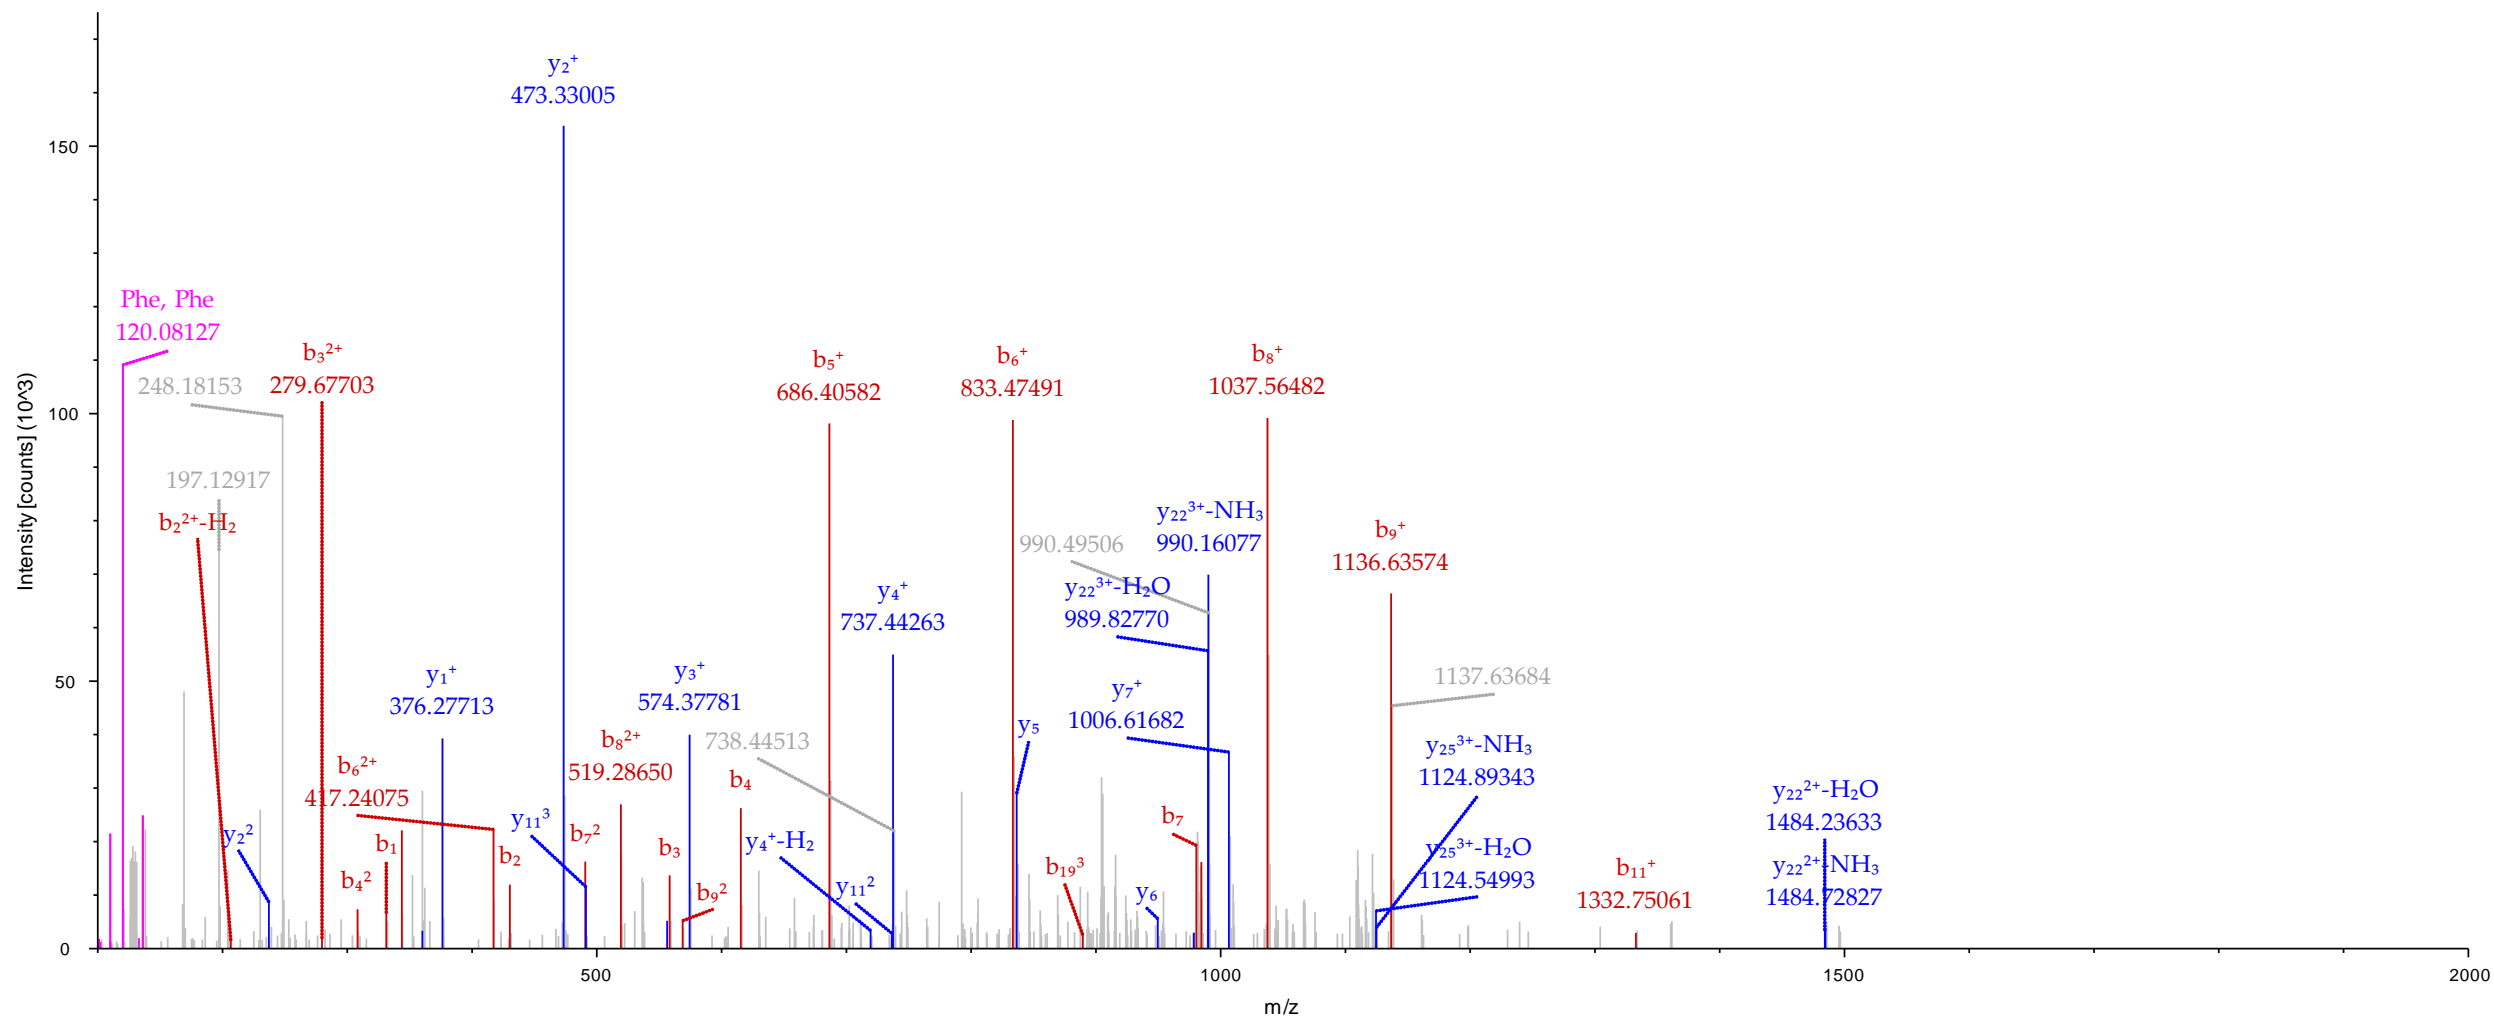

— Pre+H, Precursor, Precursor-H<sub>2</sub>O, Precursor-H<sub>2</sub>O-NH<sub>3</sub>, Precursor-NH<sub>3</sub>, Pre-H  
— y, y-H<sub>2</sub>O, y-NH<sub>3</sub>  
— Immonium  
— b, b-H<sub>2</sub>O, b-NH<sub>3</sub>

| #1 | Immonium  | b <sup>+</sup> | b <sup>2+</sup> | b <sup>3+</sup> | b <sup>4+</sup> | Seq.              | y <sup>+</sup> | y <sup>2+</sup> | y <sup>3+</sup> | y <sup>4+</sup> | #2 |
|----|-----------|----------------|-----------------|-----------------|-----------------|-------------------|----------------|-----------------|-----------------|-----------------|----|
| 1  | 303.22297 | 331.21789      | 166.11258       | 111.07748       | 83.55993        | T-TMT6plex        |                |                 |                 |                 | 32 |
| 2  | 72.08078  | 430.28630      | 215.64679       | 144.10028       | 108.32703       | V                 | 3807.96276     | 1904.48502      | 1269.99244      | 952.74615       | 31 |
| 3  | 60.04439  | 517.31833      | 259.16280       | 173.11096       | 130.08504       | S                 | 3708.89435     | 1854.95081      | 1236.96963      | 927.97904       | 30 |
| 4  | 204.07675 | 748.38272      | 374.69500       | 250.13242       | 187.85114       | W-Nitro           | 3621.86232     | 1811.43480      | 1207.95896      | 906.22104       | 29 |
| 5  | 44.04948  | 819.41983      | 410.21356       | 273.81146       | 205.61042       | A                 | 3390.79793     | 1695.90260      | 1130.93749      | 848.45494       | 28 |
| 6  | 72.08078  | 918.48825      | 459.74776       | 306.83427       | 230.37752       | V                 | 3319.76081     | 1660.38404      | 1107.25846      | 830.69566       | 27 |
| 7  | 74.06004  | 1019.53593     | 510.27160       | 340.51683       | 255.63944       | T                 | 3220.69240     | 1610.84984      | 1074.23565      | 805.92856       | 26 |
| 8  | 70.06513  | 1116.58869     | 558.79798       | 372.86775       | 279.90263       | P                 | 3119.64472     | 1560.32600      | 1040.55309      | 780.66664       | 25 |
| 9  | 330.27026 | 1473.84658     | 737.42693       | 491.95371       | 369.21710       | K-TMT6plex        | 3022.59196     | 1511.79962      | 1008.20217      | 756.40345       | 24 |
| 10 | 60.04439  | 1560.87861     | 780.94294       | 520.96439       | 390.97511       | S                 | 2665.33406     | 1333.17067      | 889.11620       | 667.08897       | 23 |
| 11 | 86.09643  | 1673.96268     | 837.48498       | 558.65908       | 419.24613       | L                 | 2578.30203     | 1289.65465      | 860.10553       | 645.33097       | 22 |
| 12 | 30.03383  | 1730.98414     | 865.99571       | 577.66623       | 433.50149       | G                 | 2465.21797     | 1233.11262      | 822.41084       | 617.05995       | 21 |
| 13 | 102.05496 | 1860.02673     | 930.51701       | 620.68043       | 465.76214       | E                 | 2408.19651     | 1204.60189      | 803.40369       | 602.80458       | 20 |
| 14 | 72.08078  | 1959.09515     | 980.05121       | 653.70323       | 490.52924       | V                 | 2279.15391     | 1140.08059      | 760.38949       | 570.54394       | 19 |
| 15 | 87.05529  | 2073.13808     | 1037.07268      | 691.71754       | 519.03998       | N                 | 2180.08550     | 1090.54639      | 727.36668       | 545.77683       | 18 |
| 16 | 120.08078 | 2220.20649     | 1110.60688      | 740.74035       | 555.80708       | F                 | 2066.04257     | 1033.52492      | 689.35237       | 517.26610       | 17 |
| 17 | 74.06004  | 2321.25417     | 1161.13072      | 774.42291       | 581.06900       | T                 | 1918.97416     | 959.99072       | 640.32957       | 480.49900       | 16 |
| 18 | 44.04948  | 2392.29128     | 1196.64928      | 798.10194       | 598.82828       | A                 | 1817.92648     | 909.46688       | 606.64701       | 455.23708       | 15 |
| 19 | 74.06004  | 2493.33896     | 1247.17312      | 831.78450       | 624.09020       | T                 | 1746.88937     | 873.94832       | 582.96797       | 437.47780       | 14 |
| 20 | 44.04948  | 2564.37607     | 1282.69168      | 855.46354       | 641.84948       | A                 | 1645.84169     | 823.42448       | 549.28541       | 412.21588       | 13 |
| 21 | 102.05496 | 2693.41867     | 1347.21297      | 898.47774       | 674.11012       | E                 | 1574.80457     | 787.90592       | 525.60638       | 394.45660       | 12 |
| 22 | 44.04948  | 2764.45578     | 1382.73153      | 922.15678       | 691.86940       | A                 | 1445.76198     | 723.38463       | 482.59218       | 362.19595       | 11 |
| 23 | 86.09643  | 2877.53984     | 1439.27356      | 959.85147       | 720.14042       | L                 | 1374.72487     | 687.86607       | 458.91314       | 344.43667       | 10 |
| 24 | 101.07094 | 3005.59842     | 1503.30285      | 1002.53766      | 752.15506       | Q                 | 1261.64080     | 631.32404       | 421.21845       | 316.16566       | 9  |
| 25 | 60.04439  | 3092.63045     | 1546.81886      | 1031.54833      | 773.91307       | S                 | 1133.58222     | 567.29475       | 378.53226       | 284.15101       | 8  |
| 26 | 70.06513  | 3189.68321     | 1595.34525      | 1063.89926      | 798.17626       | P                 | 1046.55020     | 523.77874       | 349.52158       | 262.39301       | 7  |
| 27 | 102.05496 | 3318.72581     | 1659.86654      | 1106.91345      | 830.43691       | E                 | 949.49743      | 475.25235       | 317.17066       | 238.12982       | 6  |
| 28 | 86.09643  | 3431.80987     | 1716.40857      | 1144.60814      | 858.70793       | L                 | 820.45484      | 410.73106       | 274.15646       | 205.86917       | 5  |
| 29 | 133.04301 | 3591.84052     | 1796.42390      | 1197.95169      | 898.71559       | C-Carbamidomethyl | 707.37078      | 354.18903       | 236.46178       | 177.59815       | 4  |
| 30 | 30.03383  | 3648.86198     | 1824.93463      | 1216.95885      | 912.97095       | G                 | 547.34013      | 274.17370       | 183.11823       | 137.59049       | 3  |
| 31 | 87.05529  | 3762.90491     | 1881.95609      | 1254.97315      | 941.48169       | N                 | 490.31866      | 245.66297       | 164.11107       | 123.33512       | 2  |
| 32 | 330.27026 |                |                 |                 |                 | K-TMT6plex        | 376.27574      | 188.64151       | 126.09676       | 94.82439        | 1  |

JM\_NDplasmaBVM\_TMT\_NoFrac.raw #95398 RT: 269.3350 min  
FTMS, 1035.7345@hcd35.00, z=+4, Mono m/z=1035.73450 Da, MH+=4139.91616 Da, Match Tol.=0.02 Da

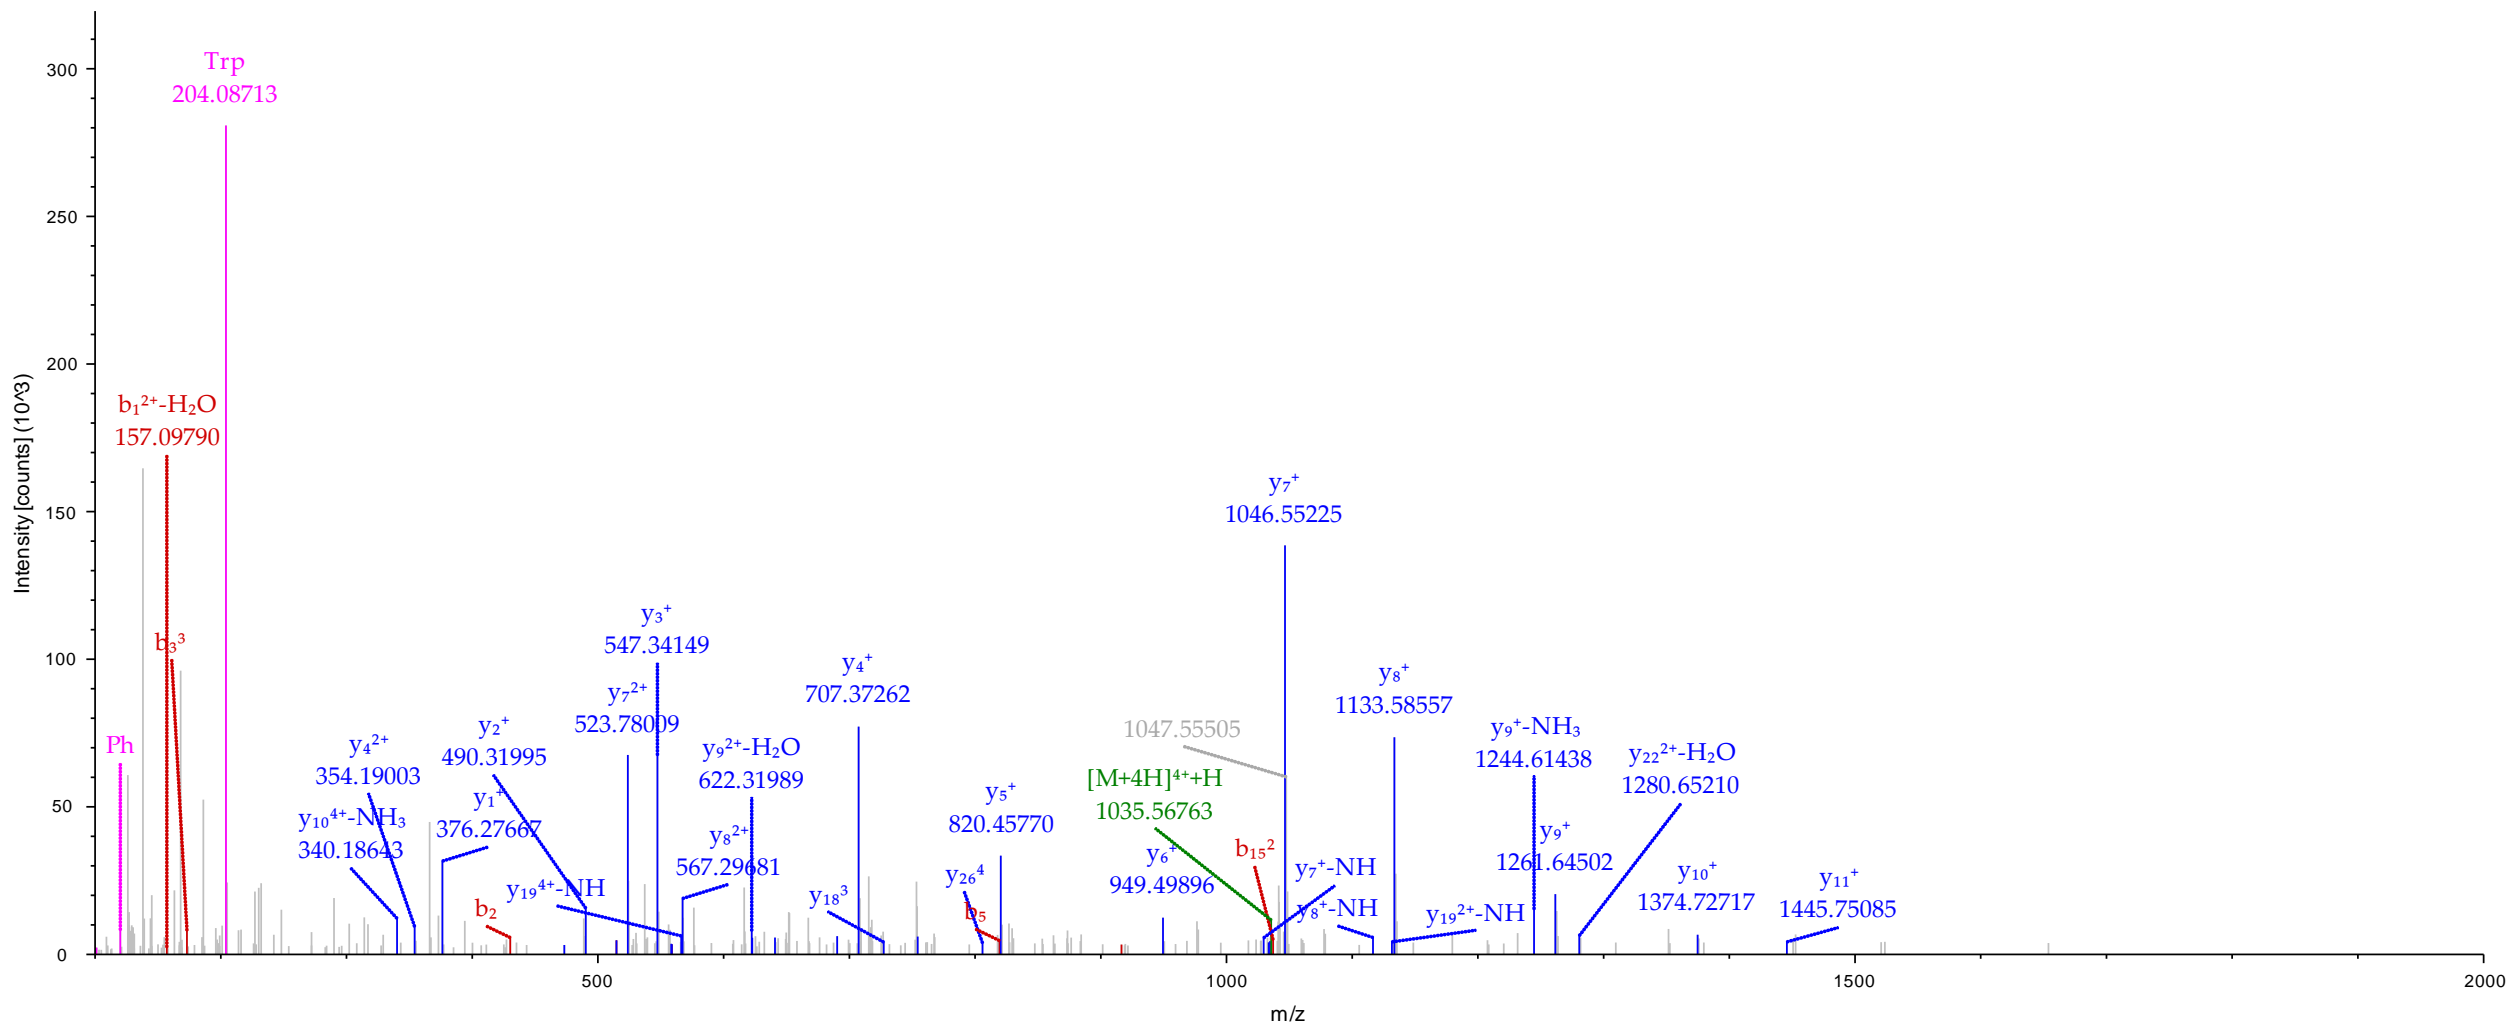

| #1 | Immonium  | b <sup>+</sup> | b <sup>2+</sup> | b <sup>3+</sup> | b <sup>4+</sup> | b <sup>5+</sup> | Seq.              | y <sup>*</sup> | y <sup>2+</sup> | y <sup>3+</sup> | y <sup>4+</sup> | y <sup>5+</sup> | #2 |
|----|-----------|----------------|-----------------|-----------------|-----------------|-----------------|-------------------|----------------|-----------------|-----------------|-----------------|-----------------|----|
| 1  | 315.25936 | 343.25427      | 172.13077       | 115.08961       | 86.56903        | 69.45668        | I-TMT6plex        |                |                 |                 |                 |                 | 48 |
| 2  | 72.08078  | 442.32269      | 221.66498       | 148.11241       | 111.33613       | 89.27036        | V                 | 5290.44272     | 2645.72500      | 1764.15243      | 1323.36614      | 1058.89437      | 47 |
| 3  | 87.05529  | 556.36561      | 278.68645       | 186.12672       | 139.84686       | 112.07894       | N                 | 5191.37431     | 2596.19079      | 1731.12962      | 1298.59904      | 1039.08068      | 46 |
| 4  | 30.03383  | 613.38708      | 307.19718       | 205.13388       | 154.10223       | 123.48324       | G                 | 5077.33138     | 2539.16933      | 1693.11531      | 1270.08830      | 1016.27210      | 45 |
| 5  | 102.05496 | 742.42967      | 371.71847       | 248.14807       | 186.36288       | 149.29176       | E                 | 5020.30992     | 2510.65860      | 1674.10816      | 1255.83294      | 1004.86781      | 44 |
| 6  | 44.04948  | 813.46678      | 407.23703       | 271.82711       | 204.12215       | 163.49918       | A                 | 4891.26733     | 2446.13730      | 1631.09396      | 1223.57229      | 979.05929       | 43 |
| 7  | 88.03930  | 928.49373      | 464.75050       | 310.16943       | 232.87889       | 186.50457       | D                 | 4820.23021     | 2410.61874      | 1607.41492      | 1205.81301      | 964.85186       | 42 |
| 8  | 44.04948  | 999.53084      | 500.26906       | 333.84846       | 250.63817       | 200.71199       | A                 | 4705.20327     | 2353.10527      | 1569.07261      | 1177.05627      | 941.84648       | 41 |
| 9  | 104.05285 | 1130.57133     | 565.78930       | 377.52863       | 283.39829       | 226.92009       | M                 | 4634.16616     | 2317.58672      | 1545.39357      | 1159.29700      | 927.63905       | 40 |
| 10 | 74.06004  | 1231.61900     | 616.31314       | 411.21119       | 308.66021       | 247.12962       | T                 | 4503.12567     | 2252.06647      | 1501.71341      | 1126.53688      | 901.43096       | 39 |
| 11 | 86.09643  | 1344.70307     | 672.85517       | 448.90587       | 336.93122       | 269.74643       | L                 | 4402.07799     | 2201.54263      | 1468.03085      | 1101.27496      | 881.22142       | 38 |
| 12 | 88.03930  | 1459.73001     | 730.36864       | 487.24819       | 365.68796       | 292.75182       | D                 | 4288.99393     | 2145.00060      | 1430.33616      | 1073.00394      | 858.60461       | 37 |
| 13 | 30.03383  | 1516.75147     | 758.87938       | 506.25534       | 379.94333       | 304.15612       | G                 | 4173.96699     | 2087.48713      | 1391.99385      | 1044.24720      | 835.59922       | 36 |
| 14 | 30.03383  | 1573.77294     | 787.39011       | 525.26250       | 394.19869       | 315.56041       | G                 | 4116.94552     | 2058.97640      | 1372.98669      | 1029.99184      | 824.19493       | 35 |
| 15 | 110.07127 | 1710.83185     | 855.91956       | 570.94880       | 428.46342       | 342.97219       | H                 | 4059.92406     | 2030.46567      | 1353.97954      | 1015.73647      | 812.79063       | 34 |
| 16 | 44.04948  | 1781.86896     | 891.43812       | 594.62784       | 446.22270       | 357.17961       | A                 | 3922.86515     | 1961.93621      | 1308.29323      | 981.47174       | 785.37885       | 33 |
| 17 | 136.07569 | 1944.93229     | 972.96978       | 648.98228       | 486.98853       | 389.79228       | Y                 | 3851.82803     | 1926.41765      | 1284.61420      | 963.71247       | 771.17143       | 32 |
| 18 | 86.09643  | 2058.01636     | 1029.51182      | 686.67697       | 515.25955       | 412.40909       | I                 | 3688.76470     | 1844.88599      | 1230.25975      | 922.94663       | 738.55876       | 31 |
| 19 | 44.04948  | 2129.05347     | 1065.03037      | 710.35601       | 533.01882       | 426.61652       | A                 | 3575.68064     | 1788.34396      | 1192.56506      | 894.67562       | 715.94195       | 30 |
| 20 | 30.03383  | 2186.07493     | 1093.54111      | 729.36316       | 547.27419       | 438.02081       | G                 | 3504.64353     | 1752.82540      | 1168.88603      | 876.91634       | 701.73453       | 29 |
| 21 | 101.07094 | 2314.13351     | 1157.57039      | 772.04935       | 579.28884       | 463.63252       | Q                 | 3447.62206     | 1724.31467      | 1149.87887      | 862.66097       | 690.33023       | 28 |
| 22 | 133.04301 | 2474.16416     | 1237.58572      | 825.39290       | 619.29650       | 495.63865       | C-Carbamidomethyl | 3319.56349     | 1660.28538      | 1107.19268      | 830.64633       | 664.71852       | 27 |
| 23 | 30.03383  | 2531.18562     | 1266.09645      | 844.40006       | 633.55186       | 507.04295       | G                 | 3159.53284     | 1580.27006      | 1053.84913      | 790.63867       | 632.71239       | 26 |
| 24 | 86.09643  | 2644.26969     | 1322.63848      | 882.09475       | 661.82288       | 529.65976       | L                 | 3102.51137     | 1551.75933      | 1034.84198      | 776.38330       | 621.30810       | 25 |
| 25 | 72.08078  | 2743.33810     | 1372.17269      | 915.11755       | 686.58998       | 549.47344       | V                 | 2989.42731     | 1495.21729      | 997.14729       | 748.11228       | 598.69128       | 24 |
| 26 | 70.06513  | 2840.39086     | 1420.69907      | 947.46847       | 710.85317       | 568.88399       | P                 | 2890.35890     | 1445.68309      | 964.12448       | 723.34518       | 578.87760       | 23 |
| 27 | 72.08078  | 2939.45928     | 1470.23328      | 980.49128       | 735.62028       | 588.69768       | V                 | 2793.30613     | 1397.15670      | 931.77356       | 699.08199       | 559.46705       | 22 |
| 28 | 104.05285 | 3070.49976     | 1535.75352      | 1024.17144      | 768.38040       | 614.90577       | M                 | 2694.23772     | 1347.62250      | 898.75076       | 674.31489       | 539.65336       | 21 |
| 29 | 44.04948  | 3141.53688     | 1571.27208      | 1047.85048      | 786.13968       | 629.11320       | A                 | 2563.19723     | 1282.10226      | 855.07060       | 641.55477       | 513.44527       | 20 |
| 30 | 102.05496 | 3270.57947     | 1635.79337      | 1090.86467      | 818.40032       | 654.92172       | E                 | 2492.16012     | 1246.58370      | 831.39156       | 623.79549       | 499.23785       | 19 |
| 31 | 181.06077 | 3478.62788     | 1739.81758      | 1160.21414      | 870.41243       | 696.53140       | Y-Nitro           | 2363.11753     | 1182.06240      | 788.37736       | 591.53484       | 473.42933       | 18 |
| 32 | 136.07569 | 3641.69120     | 1821.34924      | 1214.56859      | 911.17826       | 729.14406       | Y                 | 2155.06912     | 1078.03820      | 719.02789       | 539.52274       | 431.81965       | 17 |
| 33 | 102.05496 | 3770.73380     | 1885.87054      | 1257.58278      | 943.43891       | 754.95258       | E                 | 1992.00579     | 996.50653       | 664.67345       | 498.75691       | 399.20698       | 16 |
| 34 | 60.04439  | 3857.76583     | 1929.38655      | 1286.59346      | 965.19691       | 772.35899       | S                 | 1862.96320     | 931.98524       | 621.65925       | 466.49626       | 373.39846       | 15 |
| 35 | 60.04439  | 3944.79785     | 1972.90257      | 1315.60414      | 986.95492       | 789.76539       | S                 | 1775.93117     | 888.46922       | 592.64857       | 444.73825       | 355.99206       | 14 |
| 36 | 87.05529  | 4058.84078     | 2029.92403      | 1353.61845      | 1015.46565      | 812.57398       | N                 | 1688.89914     | 844.95321       | 563.63790       | 422.98024       | 338.58565       | 13 |
| 37 | 133.04301 | 4218.87143     | 2109.93935      | 1406.96199      | 1055.47332      | 844.58011       | C-Carbamidomethyl | 1574.85621     | 787.93175       | 525.62359       | 394.46951       | 315.77706       | 12 |
| 38 | 44.04948  | 4289.90854     | 2145.45791      | 1430.64103      | 1073.23259      | 858.78753       | A                 | 1414.82557     | 707.91642       | 472.28004       | 354.46185       | 283.77093       | 11 |
| 39 | 86.09643  | 4402.99261     | 2201.99994      | 1468.33572      | 1101.50361      | 881.40434       | I                 | 1343.78845     | 672.39786       | 448.60100       | 336.70257       | 269.56351       | 10 |
| 40 | 70.06513  | 4500.04537     | 2250.52632      | 1500.68664      | 1125.76680      | 900.81490       | P                 | 1230.70439     | 615.85583       | 410.90631       | 308.43155       | 246.94670       | 9  |
| 41 | 60.04439  | 4587.07740     | 2294.04234      | 1529.69732      | 1147.52481      | 918.22130       | S                 | 1133.65162     | 567.32945       | 378.55539       | 284.16836       | 227.53615       | 8  |
| 42 | 101.07094 | 4715.13598     | 2358.07163      | 1572.38351      | 1179.53945      | 943.83302       | Q                 | 1046.61960     | 523.81344       | 349.54472       | 262.41036       | 210.12974       | 7  |
| 43 | 101.07094 | 4843.19456     | 2422.10092      | 1615.06970      | 1211.55410      | 969.44473       | Q                 | 918.56102      | 459.78415       | 306.85852       | 230.39571       | 184.51803       | 6  |
| 44 | 30.03383  | 4900.21602     | 2450.61165      | 1634.07686      | 1225.80946      | 980.84903       | G                 | 790.50244      | 395.75486       | 264.17233       | 198.38107       | 158.90631       | 5  |
| 45 | 86.09643  | 5013.30008     | 2507.15368      | 1671.77155      | 1254.08048      | 1003.46584      | I                 | 733.48098      | 367.24413       | 245.16518       | 184.12570       | 147.50202       | 4  |
| 46 | 120.08078 | 5160.36850     | 2580.68789      | 1720.79435      | 1290.84758      | 1032.87952      | F                 | 620.39691      | 310.70210       | 207.47049       | 155.85469       | 124.88520       | 3  |
| 47 | 70.06513  | 5257.42126     | 2629.21427      | 1753.14527      | 1315.11077      | 1052.29007      | P                 | 473.32850      | 237.16789       | 158.44768       | 119.08758       | 95.47152        | 2  |
| 48 | 330.27026 |                |                 |                 |                 |                 | K-TMT6plex        | 376.27574      | 188.64151       | 126.09676       | 94.82439        | 76.06097        | 1  |

JM\_NDplasmaBVM\_TMT\_Fr3.raw #108500 RT: 305.2245 min  
FTMS, 1126.5431@hcd35.00, z=+5, Mono m/z=1126.54309 Da, MH+=5628.68635 Da, Match Tol.=0.02 Da

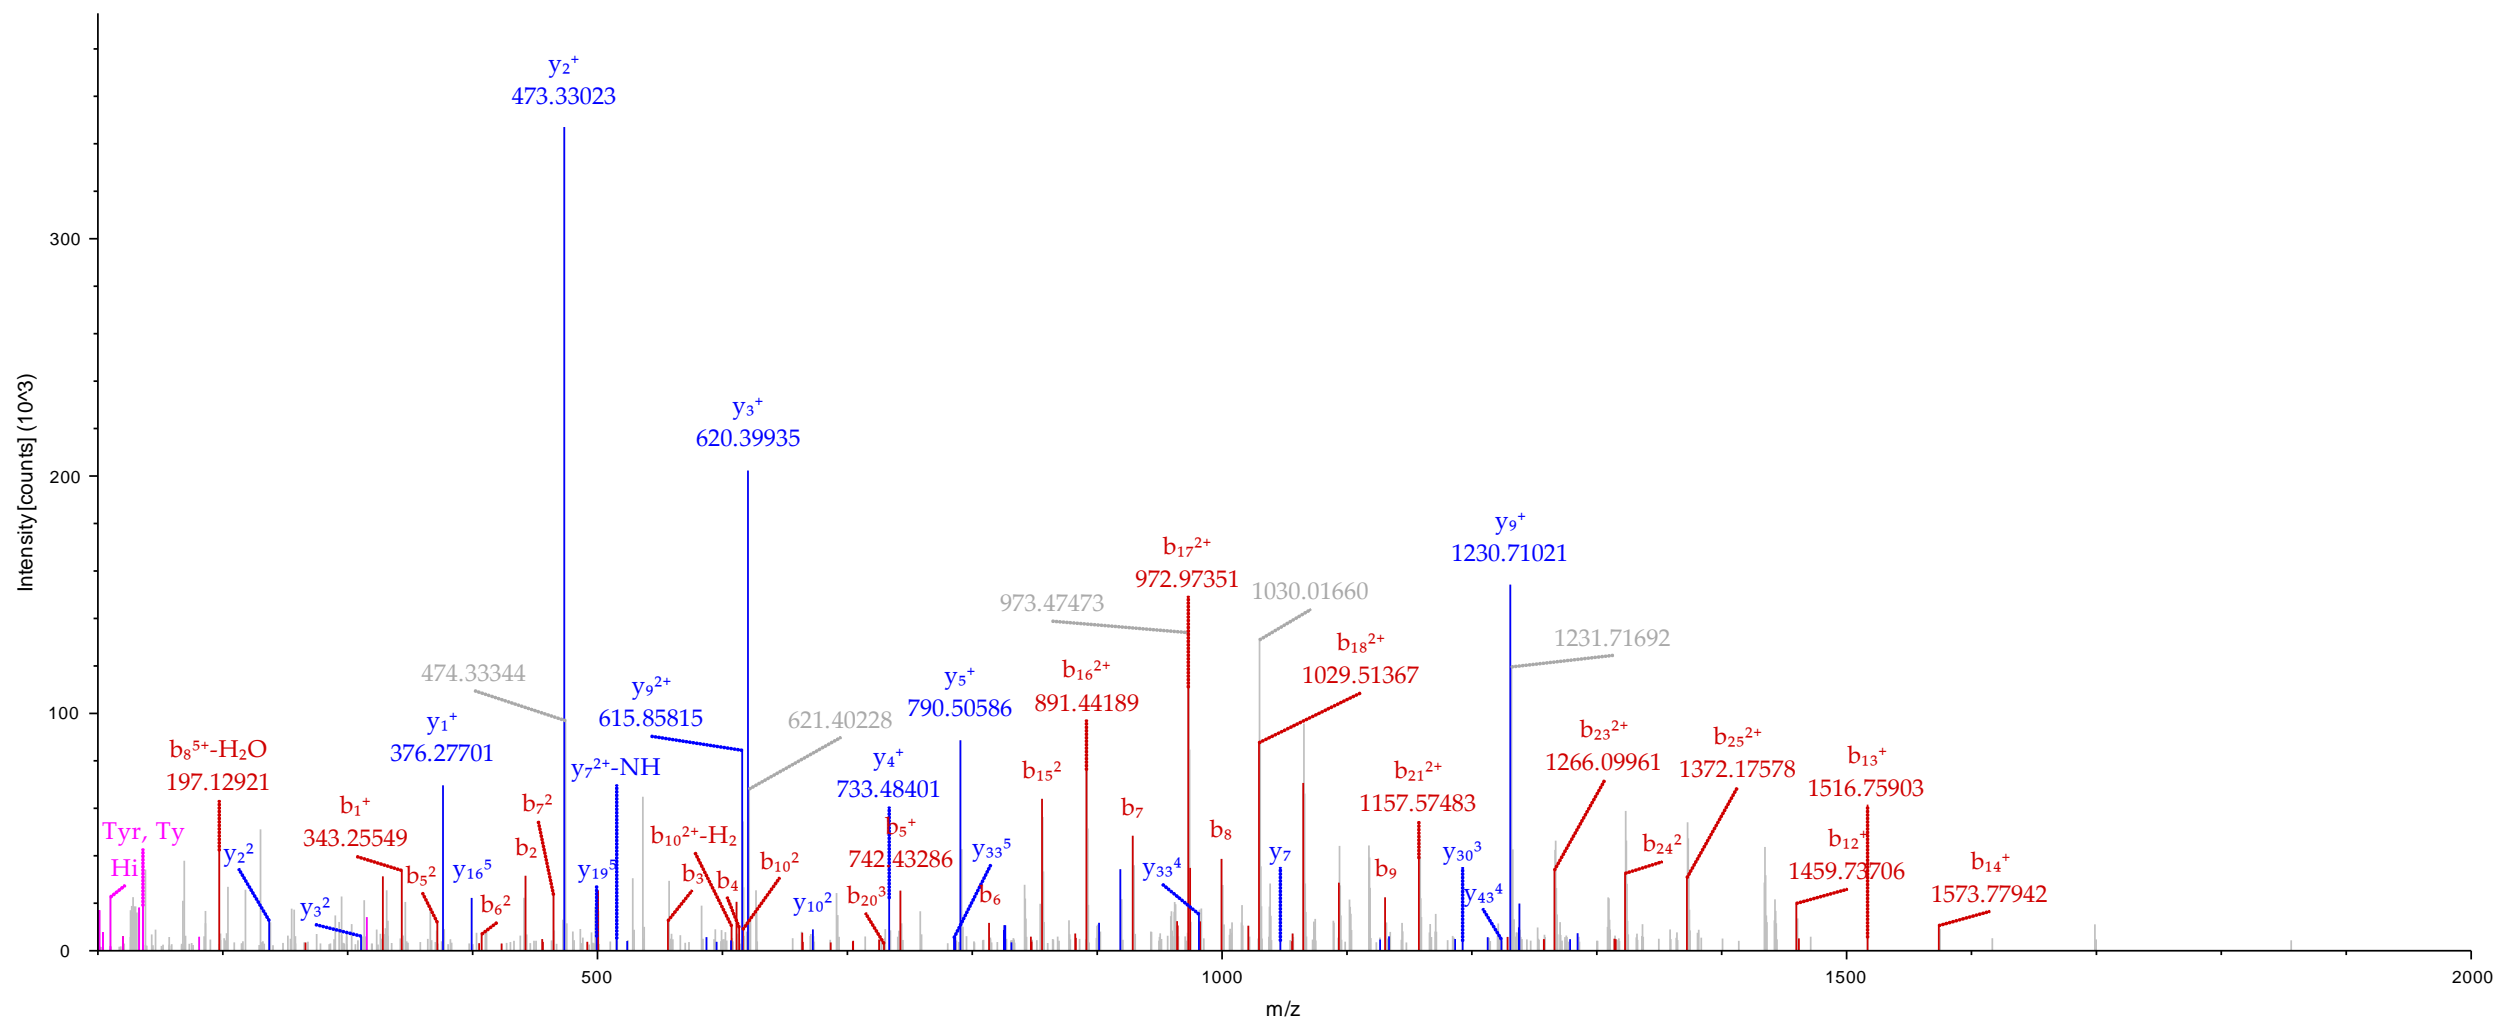

— Pre+H, Precursor, Precursor-H<sub>2</sub>O, Precursor-H<sub>2</sub>O-NH<sub>3</sub>, Precursor-NH<sub>3</sub>, Pre-H — Immonium  
— y, y-H<sub>2</sub>O, y-NH<sub>3</sub> — b, b-H<sub>2</sub>O, b-NH<sub>3</sub>



| #1 | Immonium  | b <sup>+</sup> | b <sup>2+</sup> | b <sup>3+</sup> | Seq.                       | y <sup>+</sup> | y <sup>2+</sup> | y <sup>3+</sup> | #2 |
|----|-----------|----------------|-----------------|-----------------|----------------------------|----------------|-----------------|-----------------|----|
| 1  | 362.20594 | 390.20086      | 195.60407       | 130.73847       | C-TMT6plex-Carbamidomethyl |                |                 |                 | 25 |
| 2  | 133.04301 | 550.23151      | 275.61939       | 184.08202       | C-Carbamidomethyl          | 2790.19029     | 1395.59878      | 930.73495       | 24 |
| 3  | 60.04439  | 637.26353      | 319.13541       | 213.09270       | S                          | 2630.15964     | 1315.58346      | 877.39140       | 23 |
| 4  | 86.09643  | 750.34760      | 375.67744       | 250.78738       | I                          | 2543.12761     | 1272.06744      | 848.38072       | 22 |
| 5  | 87.05529  | 864.39053      | 432.69890       | 288.80169       | N                          | 2430.04355     | 1215.52541      | 810.68603       | 21 |
| 6  | 60.04439  | 951.42255      | 476.21492       | 317.81237       | S                          | 2316.00062     | 1158.50395      | 772.67172       | 20 |
| 7  | 70.06513  | 1048.47532     | 524.74130       | 350.16329       | P                          | 2228.96859     | 1114.98793      | 743.66105       | 19 |
| 8  | 70.06513  | 1145.52808     | 573.26768       | 382.51421       | P                          | 2131.91583     | 1066.46155      | 711.31013       | 18 |
| 9  | 86.09643  | 1258.61215     | 629.80971       | 420.20890       | L                          | 2034.86306     | 1017.93517      | 678.95921       | 17 |
| 10 | 181.06077 | 1466.66055     | 733.83391       | 489.55837       | Y-Nitro                    | 1921.77900     | 961.39314       | 641.26452       | 16 |
| 11 | 133.04301 | 1626.69120     | 813.84924       | 542.90192       | C-Carbamidomethyl          | 1713.73059     | 857.36893       | 571.91505       | 15 |
| 12 | 60.04439  | 1713.72323     | 857.36525       | 571.91259       | S                          | 1553.69994     | 777.35361       | 518.57150       | 14 |
| 13 | 60.04439  | 1800.75526     | 900.88127       | 600.92327       | S                          | 1466.66792     | 733.83760       | 489.56082       | 13 |
| 14 | 101.07094 | 1928.81383     | 964.91056       | 643.60946       | Q                          | 1379.63589     | 690.32158       | 460.55015       | 12 |
| 15 | 86.09643  | 2041.89790     | 1021.45259      | 681.30415       | I                          | 1251.57731     | 626.29229       | 417.86395       | 11 |
| 16 | 88.03930  | 2156.92484     | 1078.96606      | 719.64646       | D                          | 1138.49325     | 569.75026       | 380.16927       | 10 |
| 17 | 44.04948  | 2227.96195     | 1114.48462      | 743.32550       | A                          | 1023.46630     | 512.23679       | 341.82695       | 9  |
| 18 | 102.05496 | 2357.00455     | 1179.00591      | 786.33970       | E                          | 952.42919      | 476.71823       | 318.14791       | 8  |
| 19 | 120.04776 | 2504.03995     | 1252.52361      | 835.35150       | M-Oxidation                | 823.38660      | 412.19694       | 275.13372       | 7  |
| 20 | 86.09643  | 2617.12401     | 1309.06564      | 873.04619       | I                          | 676.35120      | 338.67924       | 226.12192       | 6  |
| 21 | 88.03930  | 2732.15095     | 1366.57912      | 911.38850       | D                          | 563.26713      | 282.13720       | 188.42723       | 5  |
| 22 | 74.06004  | 2833.19863     | 1417.10295      | 945.07106       | T                          | 448.24019      | 224.62373       | 150.08491       | 4  |
| 23 | 86.09643  | 2946.28270     | 1473.64499      | 982.76575       | L                          | 347.19251      | 174.09989       | 116.40235       | 3  |
| 24 | 101.07094 | 3074.34127     | 1537.67428      | 1025.45194      | Q                          | 234.10845      | 117.55786       | 78.70767        | 2  |
| 25 | 60.04439  |                |                 |                 | S                          | 106.04987      | 53.52857        | 36.02147        | 1  |

JM\_NDplasmaBVM\_TMT\_Fr1.raw #67916 RT: 228.9997 min  
 FTMS, 1060.1477 @hcd35.00, z=+3, Mono m/z=1060.14771 Da, MH+=3178.42856 Da, Match Tol.=0.02 Da

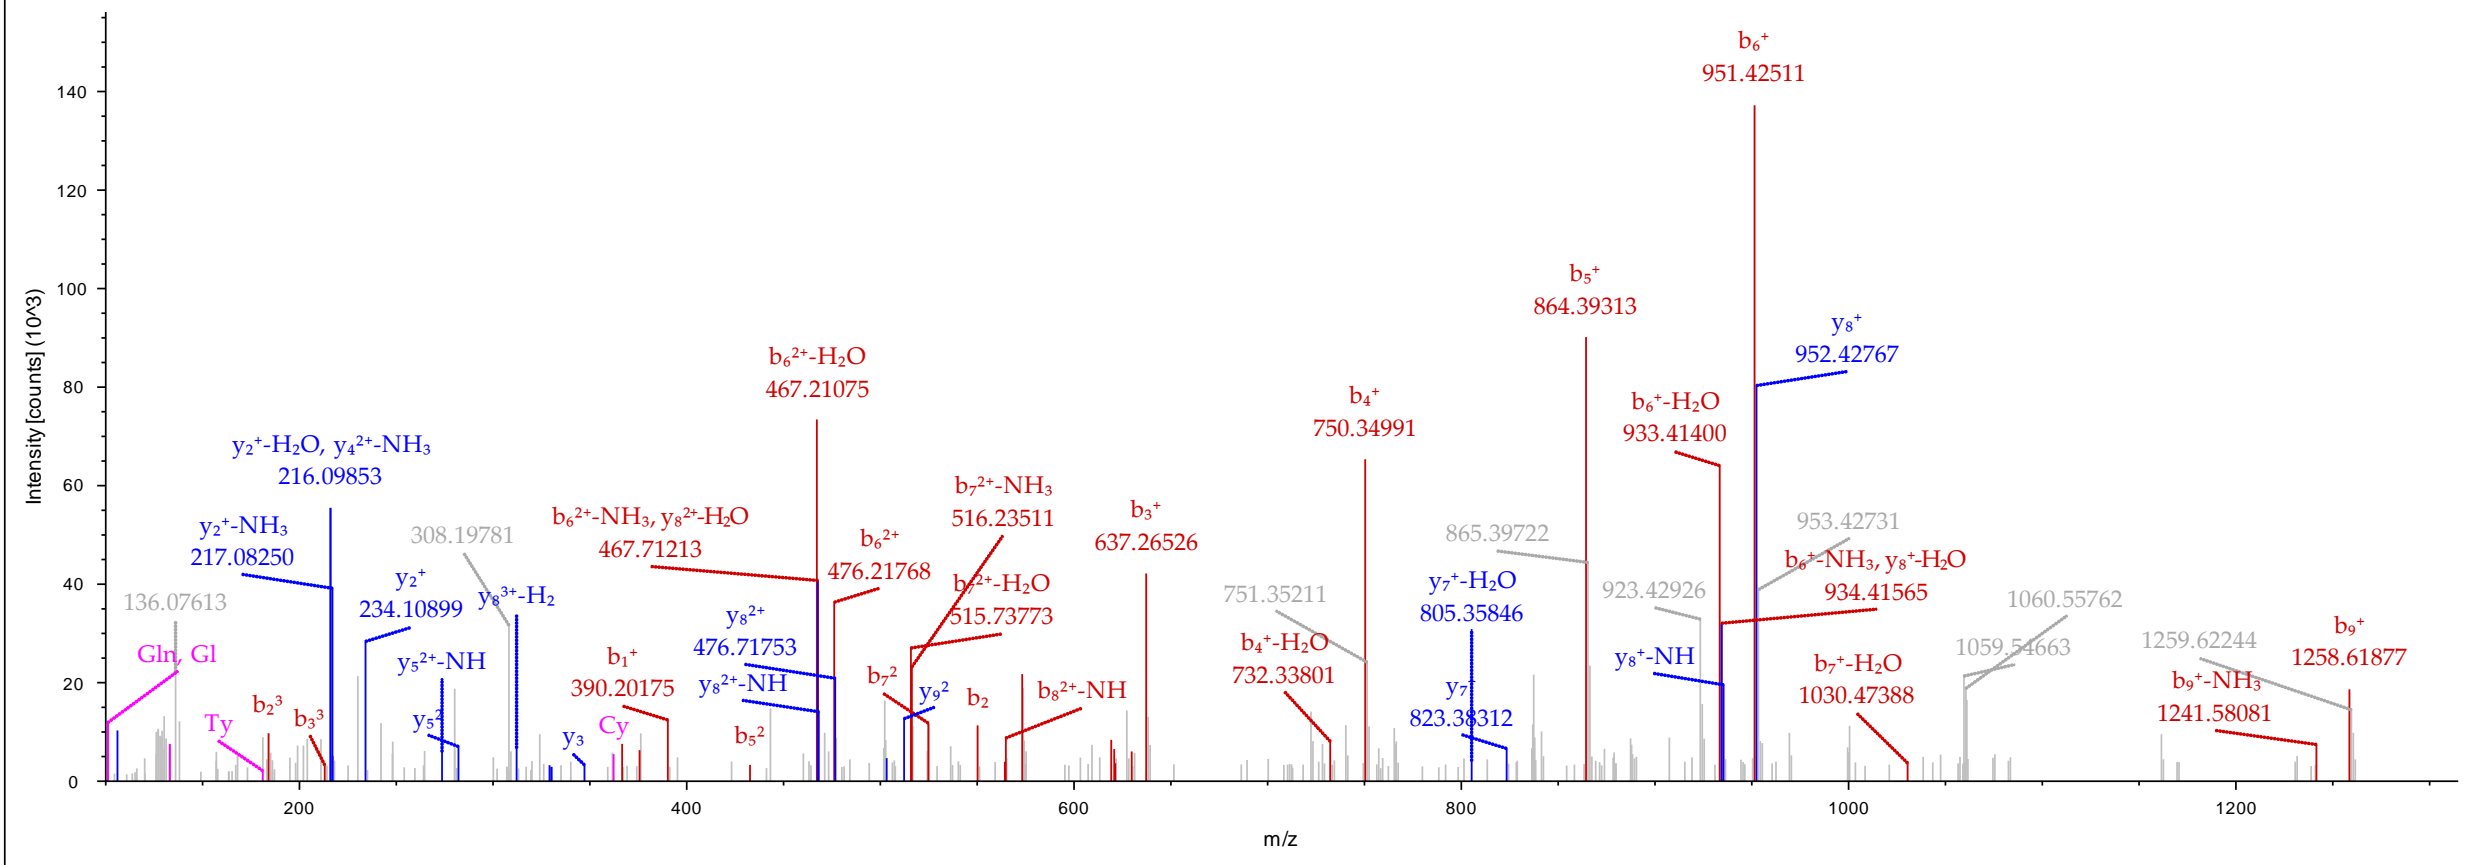

— Pre+H, Precursor, Precursor-H<sub>2</sub>O, Precursor-H<sub>2</sub>O-NH<sub>3</sub>, Precursor-NH<sub>3</sub>, Pre-H     — Immonium  
— y, y-H<sub>2</sub>O, y-NH<sub>3</sub>     — b, b-H<sub>2</sub>O, b-NH<sub>3</sub>

| #1 | Immonium  | b <sup>+</sup> | b <sup>2+</sup> | b <sup>3+</sup> | b <sup>4+</sup> | b <sup>5+</sup> | Seq.              | y <sup>+</sup> | y <sup>2+</sup> | y <sup>3+</sup> | y <sup>4+</sup> | y <sup>5+</sup> | #2 |
|----|-----------|----------------|-----------------|-----------------|-----------------|-----------------|-------------------|----------------|-----------------|-----------------|-----------------|-----------------|----|
| 1  | 349.24371 | 377.23862      | 189.12295       | 126.41773       | 95.06511        | 76.25355        | F-TMT6plex        |                |                 |                 |                 |                 | 32 |
| 2  | 102.05496 | 506.28122      | 253.64425       | 169.43192       | 127.32576       | 102.06206       | E                 | 4023.79668     | 2012.40198      | 1341.93708      | 1006.70463      | 805.56516       | 31 |
| 3  | 102.05496 | 635.32381      | 318.16554       | 212.44612       | 159.58641       | 127.87058       | E                 | 3894.75408     | 1947.88068      | 1298.92288      | 974.44398       | 779.75664       | 30 |
| 4  | 133.04301 | 795.35446      | 398.18087       | 265.78967       | 199.59407       | 159.87671       | C-Carbamidomethyl | 3765.71149     | 1883.35938      | 1255.90868      | 942.18333       | 753.94812       | 29 |
| 5  | 133.04301 | 955.38511      | 478.19619       | 319.13322       | 239.60173       | 191.88284       | C-Carbamidomethyl | 3605.68084     | 1803.34406      | 1202.56513      | 902.17567       | 721.94199       | 28 |
| 6  | 101.07094 | 1083.44368     | 542.22548       | 361.81941       | 271.61638       | 217.49456       | Q                 | 3445.65019     | 1723.32873      | 1149.22158      | 862.16801       | 689.93586       | 27 |
| 7  | 102.05496 | 1212.48628     | 606.74678       | 404.83361       | 303.87703       | 243.30308       | E                 | 3317.59161     | 1659.29945      | 1106.53539      | 830.15336       | 664.32414       | 26 |
| 8  | 87.05529  | 1326.52920     | 663.76824       | 442.84792       | 332.38776       | 266.11166       | N                 | 3188.54902     | 1594.77815      | 1063.52119      | 797.89271       | 638.51563       | 25 |
| 9  | 74.06004  | 1427.57688     | 714.29208       | 476.53048       | 357.64968       | 286.32120       | T                 | 3074.50609     | 1537.75669      | 1025.50688      | 769.38198       | 615.70704       | 24 |
| 10 | 70.06513  | 1524.62965     | 762.81846       | 508.88140       | 381.91287       | 305.73175       | P                 | 2973.45842     | 1487.23285      | 991.82432       | 744.12006       | 595.49750       | 23 |
| 11 | 104.05285 | 1655.67013     | 828.33870       | 552.56156       | 414.67299       | 331.93985       | M                 | 2876.40565     | 1438.70646      | 959.47340       | 719.85687       | 576.08695       | 22 |
| 12 | 87.05529  | 1769.71306     | 885.36017       | 590.57587       | 443.18372       | 354.74843       | N                 | 2745.36517     | 1373.18622      | 915.79324       | 687.09675       | 549.87885       | 21 |
| 13 | 86.09643  | 1882.79712     | 941.90220       | 628.27056       | 471.45474       | 377.36525       | I                 | 2631.32224     | 1316.16476      | 877.77893       | 658.58602       | 527.07027       | 20 |
| 14 | 120.08078 | 2029.86554     | 1015.43641      | 677.29336       | 508.22184       | 406.77893       | F                 | 2518.23818     | 1259.62273      | 840.08424       | 630.31500       | 504.45346       | 19 |
| 15 | 104.05285 | 2160.90602     | 1080.95665      | 720.97352       | 540.98196       | 432.98703       | M                 | 2371.16976     | 1186.08852      | 791.06144       | 593.54790       | 475.03977       | 18 |
| 16 | 133.04301 | 2320.93667     | 1160.97197      | 774.31707       | 580.98962       | 464.99315       | C-Carbamidomethyl | 2240.12928     | 1120.56828      | 747.38128       | 560.78778       | 448.83168       | 17 |
| 17 | 74.06004  | 2421.98435     | 1211.49581      | 807.99963       | 606.25154       | 485.20269       | T                 | 2080.09863     | 1040.55295      | 694.03773       | 520.78011       | 416.82555       | 16 |
| 18 | 181.06077 | 2630.03275     | 1315.52001      | 877.34910       | 658.26365       | 526.81237       | Y-Nitro           | 1979.05095     | 990.02911       | 660.35517       | 495.51820       | 396.61601       | 15 |
| 19 | 120.08078 | 2777.10117     | 1389.05422      | 926.37191       | 695.03075       | 556.22605       | F                 | 1771.00254     | 886.00491       | 591.00570       | 443.50609       | 355.00633       | 14 |
| 20 | 120.04776 | 2924.13657     | 1462.57192      | 975.38371       | 731.78960       | 585.63313       | M-Oxidation       | 1623.93413     | 812.47070       | 541.98289       | 406.73899       | 325.59265       | 13 |
| 21 | 70.06513  | 3021.18933     | 1511.09830      | 1007.73463      | 756.05279       | 605.04369       | P                 | 1476.89873     | 738.95300       | 492.97109       | 369.98014       | 296.18557       | 12 |
| 22 | 44.04948  | 3092.22644     | 1546.61686      | 1031.41367      | 773.81207       | 619.25111       | A                 | 1379.84597     | 690.42662       | 460.62017       | 345.71695       | 276.77501       | 11 |
| 23 | 44.04948  | 3163.26356     | 1582.13542      | 1055.09270      | 791.57135       | 633.45853       | A                 | 1308.80885     | 654.90807       | 436.94114       | 327.95767       | 262.56759       | 10 |
| 24 | 102.05496 | 3292.30615     | 1646.65671      | 1098.10690      | 823.83200       | 659.26705       | E                 | 1237.77174     | 619.38951       | 413.26210       | 310.19839       | 248.36017       | 9  |
| 25 | 70.06513  | 3389.35891     | 1695.18310      | 1130.45782      | 848.09519       | 678.67760       | P                 | 1108.72915     | 554.86821       | 370.24790       | 277.93774       | 222.55165       | 8  |
| 26 | 86.09643  | 3502.44298     | 1751.72513      | 1168.15251      | 876.36620       | 701.29442       | L                 | 1011.67638     | 506.34183       | 337.89698       | 253.67455       | 203.14110       | 7  |
| 27 | 101.07094 | 3630.50156     | 1815.75442      | 1210.83870      | 908.38085       | 726.90613       | Q                 | 898.59232      | 449.79980       | 300.20229       | 225.40354       | 180.52429       | 6  |
| 28 | 86.09643  | 3743.58562     | 1872.29645      | 1248.53339      | 936.65186       | 749.52295       | L                 | 770.53374      | 385.77051       | 257.51610       | 193.38889       | 154.91257       | 5  |
| 29 | 70.06513  | 3840.63838     | 1920.82283      | 1280.88431      | 960.91505       | 768.93350       | P                 | 657.44968      | 329.22848       | 219.82141       | 165.11788       | 132.29576       | 4  |
| 30 | 44.04948  | 3911.67550     | 1956.34139      | 1304.56335      | 978.67433       | 783.14092       | A                 | 560.39691      | 280.70210       | 187.47049       | 140.85469       | 112.88520       | 3  |
| 31 | 86.09643  | 4024.75956     | 2012.88342      | 1342.25804      | 1006.94535      | 805.75773       | I                 | 489.35980      | 245.18354       | 163.79145       | 123.09541       | 98.67778        | 2  |
| 32 | 330.27026 |                |                 |                 |                 |                 | K-TMT6plex        | 376.27574      | 188.64151       | 126.09676       | 94.82439        | 76.06097        | 1  |

Nitro-Tyr immonium ion is detected in MS/MS spectra and added brown colored in the following spectrum

JM\_NDplasmaBVM\_TMT\_Fr4\_20171103150556.raw #102028 RT: 302.0993 min  
 FTMS, 880.8220@hcd35.00, z=+5, Mono m/z=880.42126 Da, MH+=4398.07722 Da, Match Tol.=0.02 Da

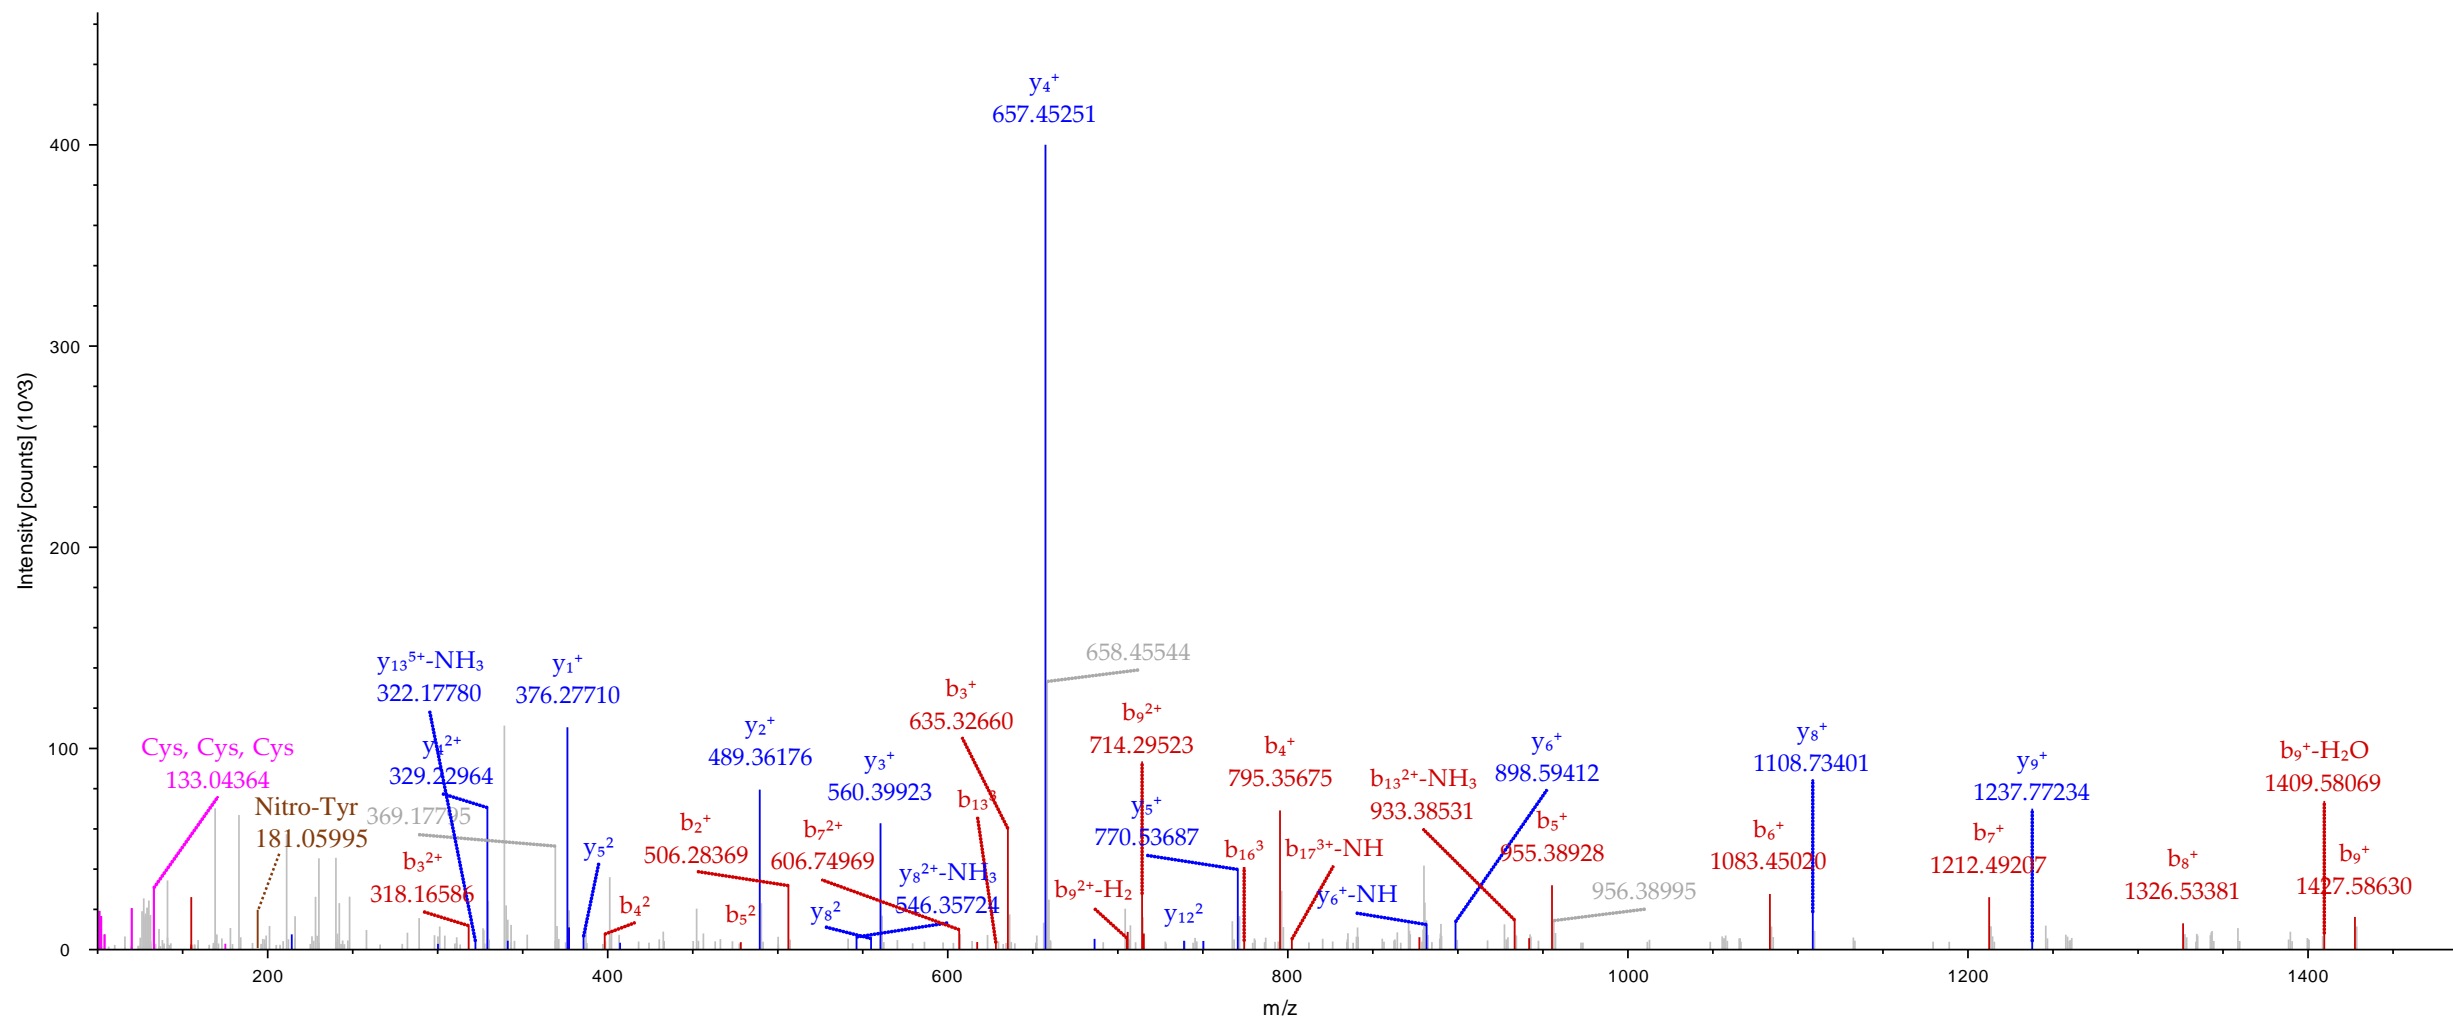

— Pre+H, Precursor, Precursor-H<sub>2</sub>O, Precursor-H<sub>2</sub>O-NH<sub>3</sub>, Precursor-NH<sub>3</sub>, Pre-H  
— y, y-H<sub>2</sub>O, y-NH<sub>3</sub>  
— Immonium  
— b, b-H<sub>2</sub>O, b-NH<sub>3</sub>

| #1 | Immonium  | b <sup>+</sup> | b <sup>2+</sup> | b <sup>3+</sup> | b <sup>4+</sup> | Seq.              | y <sup>+</sup> | y <sup>2+</sup> | y <sup>3+</sup> | y <sup>4+</sup> | #2 |
|----|-----------|----------------|-----------------|-----------------|-----------------|-------------------|----------------|-----------------|-----------------|-----------------|----|
| 1  | 317.20224 | 345.19715      | 173.10221       | 115.73723       | 87.05475        | D-TMT6plex        |                |                 |                 |                 | 37 |
| 2  | 86.09643  | 458.28122      | 229.64425       | 153.43192       | 115.32576       | I                 | 3998.95646     | 1999.98187      | 1333.65701      | 1000.49457      | 36 |
| 3  | 74.06004  | 559.32889      | 280.16809       | 187.11448       | 140.58768       | T                 | 3885.87240     | 1943.43984      | 1295.96232      | 972.22356       | 35 |
| 4  | 74.06004  | 660.37657      | 330.69192       | 220.79704       | 165.84960       | T                 | 3784.82472     | 1892.91600      | 1262.27976      | 946.96164       | 34 |
| 5  | 72.08078  | 759.44499      | 380.22613       | 253.81985       | 190.61670       | V                 | 3683.77704     | 1842.39216      | 1228.59720      | 921.69972       | 33 |
| 6  | 87.05529  | 873.48791      | 437.24760       | 291.83416       | 219.12744       | N                 | 3584.70863     | 1792.85795      | 1195.57439      | 896.93261       | 32 |
| 7  | 120.08078 | 1020.55633     | 510.78180       | 340.85696       | 255.89454       | F                 | 3470.66570     | 1735.83649      | 1157.56009      | 868.42188       | 31 |
| 8  | 70.06513  | 1117.60909     | 559.30818       | 373.20788       | 280.15773       | P                 | 3323.59729     | 1662.30228      | 1108.53728      | 831.65478       | 30 |
| 9  | 70.06513  | 1214.66186     | 607.83457       | 405.55880       | 304.42092       | P                 | 3226.54452     | 1613.77590      | 1076.18636      | 807.39159       | 29 |
| 10 | 44.04948  | 1285.69897     | 643.35312       | 429.23784       | 322.18020       | A                 | 3129.49176     | 1565.24952      | 1043.83544      | 783.12840       | 28 |
| 11 | 86.09643  | 1398.78303     | 699.89515       | 466.93253       | 350.45122       | L                 | 3058.45465     | 1529.73096      | 1020.15640      | 765.36912       | 27 |
| 12 | 44.04948  | 1469.82015     | 735.41371       | 490.61157       | 368.21049       | A                 | 2945.37058     | 1473.18893      | 982.46171       | 737.09810       | 26 |
| 13 | 60.04439  | 1556.85217     | 778.92973       | 519.62224       | 389.96850       | S                 | 2874.33347     | 1437.67037      | 958.78267       | 719.33882       | 25 |
| 14 | 30.03383  | 1613.87364     | 807.44046       | 538.62940       | 404.22387       | G                 | 2787.30144     | 1394.15436      | 929.77200       | 697.58082       | 24 |
| 15 | 30.03383  | 1670.89510     | 835.95119       | 557.63655       | 418.47923       | G                 | 2730.27998     | 1365.64363      | 910.76484       | 683.32545       | 23 |
| 16 | 30.03383  | 1727.91657     | 864.46192       | 576.64371       | 432.73460       | G                 | 2673.25851     | 1337.13290      | 891.75769       | 669.07009       | 22 |
| 17 | 181.06077 | 1935.96497     | 968.48612       | 645.99318       | 484.74670       | Y-Nitro           | 2616.23705     | 1308.62216      | 872.75053       | 654.81472       | 21 |
| 18 | 74.06004  | 2037.01265     | 1019.00996      | 679.67573       | 510.00862       | T                 | 2408.18864     | 1204.59796      | 803.40107       | 602.80262       | 20 |
| 19 | 120.04776 | 2184.04805     | 1092.52766      | 728.68753       | 546.76747       | M-Oxidation       | 2307.14096     | 1154.07412      | 769.71851       | 577.54070       | 19 |
| 20 | 60.04439  | 2271.08008     | 1136.04368      | 757.69821       | 568.52548       | S                 | 2160.10557     | 1080.55642      | 720.70671       | 540.78185       | 18 |
| 21 | 60.04439  | 2358.11211     | 1179.55969      | 786.70889       | 590.28348       | S                 | 2073.07354     | 1037.04041      | 691.69603       | 519.02384       | 17 |
| 22 | 101.07094 | 2486.17068     | 1243.58898      | 829.39508       | 622.29813       | Q                 | 1986.04151     | 993.52439       | 662.68535       | 497.26583       | 16 |
| 23 | 86.09643  | 2599.25475     | 1300.13101      | 867.08977       | 650.56914       | L                 | 1857.98293     | 929.49510       | 619.99916       | 465.25119       | 15 |
| 24 | 74.06004  | 2700.30243     | 1350.65485      | 900.77233       | 675.83106       | T                 | 1744.89887     | 872.95307       | 582.30447       | 436.98017       | 14 |
| 25 | 86.09643  | 2813.38649     | 1407.19688      | 938.46701       | 704.10208       | L                 | 1643.85119     | 822.42923       | 548.62191       | 411.71825       | 13 |
| 26 | 70.06513  | 2910.43925     | 1455.72327      | 970.81794       | 728.36527       | P                 | 1530.76712     | 765.88720       | 510.92723       | 383.44724       | 12 |
| 27 | 44.04948  | 2981.47637     | 1491.24182      | 994.49697       | 746.12455       | A                 | 1433.71436     | 717.36082       | 478.57630       | 359.18405       | 11 |
| 28 | 72.08078  | 3080.54478     | 1540.77603      | 1027.51978      | 770.89165       | V                 | 1362.67725     | 681.84226       | 454.89727       | 341.42477       | 10 |
| 29 | 102.05496 | 3209.58738     | 1605.29733      | 1070.53398      | 803.15230       | E                 | 1263.60883     | 632.30806       | 421.87446       | 316.65767       | 9  |
| 30 | 133.04301 | 3369.61802     | 1685.31265      | 1123.87753      | 843.15996       | C-Carbamidomethyl | 1134.56624     | 567.78676       | 378.86026       | 284.39702       | 8  |
| 31 | 70.06513  | 3466.67079     | 1733.83903      | 1156.22845      | 867.42315       | P                 | 974.53559      | 487.77143       | 325.51672       | 244.38936       | 7  |
| 32 | 102.05496 | 3595.71338     | 1798.36033      | 1199.24264      | 899.68380       | E                 | 877.48283      | 439.24505       | 293.16579       | 220.12616       | 6  |
| 33 | 30.03383  | 3652.73484     | 1826.87106      | 1218.24980      | 913.93917       | G                 | 748.44024      | 374.72376       | 250.15160       | 187.86552       | 5  |
| 34 | 102.05496 | 3781.77744     | 1891.39236      | 1261.26400      | 946.19982       | E                 | 691.41877      | 346.21302       | 231.14444       | 173.61015       | 4  |
| 35 | 60.04439  | 3868.80947     | 1934.90837      | 1290.27467      | 967.95782       | S                 | 562.37618      | 281.69173       | 188.13024       | 141.34950       | 3  |
| 36 | 72.08078  | 3967.87788     | 1984.44258      | 1323.29748      | 992.72493       | V                 | 475.34415      | 238.17571       | 159.11957       | 119.59150       | 2  |
| 37 | 330.27026 |                |                 |                 |                 | K-TMT6plex        | 376.27574      | 188.64151       | 126.09676       | 94.82439        | 1  |



| #1 | Immonium  | b <sup>+</sup> | b <sup>2+</sup> | b <sup>3+</sup> | b <sup>4+</sup> | Seq.        | y <sup>+</sup> | y <sup>2+</sup> | y <sup>3+</sup> | y <sup>4+</sup> | #2 |
|----|-----------|----------------|-----------------|-----------------|-----------------|-------------|----------------|-----------------|-----------------|-----------------|----|
| 1  | 303.22297 | 331.21789      | 166.11258       | 111.07748       | 83.55993        | T-TMT6plex  |                |                 |                 |                 | 29 |
| 2  | 44.04948  | 402.25500      | 201.63114       | 134.75652       | 101.31921       | A           | 3186.48956     | 1593.74842      | 1062.83471      | 797.37785       | 28 |
| 3  | 60.04439  | 489.28703      | 245.14715       | 163.76719       | 123.07721       | S           | 3115.45245     | 1558.22986      | 1039.15567      | 779.61857       | 27 |
| 4  | 70.06513  | 586.33979      | 293.67353       | 196.11812       | 147.34041       | P           | 3028.42042     | 1514.71385      | 1010.14499      | 757.86056       | 26 |
| 5  | 88.03930  | 701.36674      | 351.18701       | 234.46043       | 176.09714       | D           | 2931.36766     | 1466.18747      | 977.79407       | 733.59737       | 25 |
| 6  | 101.07094 | 829.42531      | 415.21629       | 277.14662       | 208.11179       | Q           | 2816.34071     | 1408.67400      | 939.45176       | 704.84064       | 24 |
| 7  | 74.06004  | 930.47299      | 465.74013       | 310.82918       | 233.37371       | T           | 2688.28214     | 1344.64471      | 896.76556       | 672.82599       | 23 |
| 8  | 102.05496 | 1059.51558     | 530.26143       | 353.84338       | 265.63435       | E           | 2587.23446     | 1294.12087      | 863.08300       | 647.56407       | 22 |
| 9  | 120.04776 | 1206.55098     | 603.77913       | 402.85518       | 302.39320       | M-Oxidation | 2458.19186     | 1229.59957      | 820.06881       | 615.30342       | 21 |
| 10 | 74.06004  | 1307.59866     | 654.30297       | 436.53774       | 327.65512       | T           | 2311.15647     | 1156.08187      | 771.05701       | 578.54457       | 20 |
| 11 | 86.09643  | 1420.68273     | 710.84500       | 474.23243       | 355.92614       | I           | 2210.10879     | 1105.55803      | 737.37445       | 553.28265       | 19 |
| 12 | 102.05496 | 1549.72532     | 775.36630       | 517.24662       | 388.18679       | E           | 2097.02472     | 1049.01600      | 699.67976       | 525.01164       | 18 |
| 13 | 30.03383  | 1606.74678     | 803.87703       | 536.25378       | 402.44215       | G           | 1967.98213     | 984.49470       | 656.66556       | 492.75099       | 17 |
| 14 | 86.09643  | 1719.83085     | 860.41906       | 573.94847       | 430.71317       | L           | 1910.96067     | 955.98397       | 637.65841       | 478.49562       | 16 |
| 15 | 101.07094 | 1847.88942     | 924.44835       | 616.63466       | 462.72781       | Q           | 1797.87660     | 899.44194       | 599.96372       | 450.22461       | 15 |
| 16 | 70.06513  | 1944.94219     | 972.97473       | 648.98558       | 486.99100       | P           | 1669.81802     | 835.41265       | 557.27753       | 418.20996       | 14 |
| 17 | 74.06004  | 2045.98987     | 1023.49857      | 682.66814       | 512.25292       | T           | 1572.76526     | 786.88627       | 524.92660       | 393.94677       | 13 |
| 18 | 72.08078  | 2145.05828     | 1073.03278      | 715.69094       | 537.02003       | V           | 1471.71758     | 736.36243       | 491.24405       | 368.68485       | 12 |
| 19 | 102.05496 | 2274.10087     | 1137.55408      | 758.70514       | 569.28068       | E           | 1372.64917     | 686.82822       | 458.22124       | 343.91775       | 11 |
| 20 | 181.06077 | 2482.14928     | 1241.57828      | 828.05461       | 621.29278       | Y-Nitro     | 1243.60658     | 622.30693       | 415.20704       | 311.65710       | 10 |
| 21 | 72.08078  | 2581.21769     | 1291.11249      | 861.07742       | 646.05988       | V           | 1035.55817     | 518.28272       | 345.85757       | 259.64500       | 9  |
| 22 | 72.08078  | 2680.28611     | 1340.64669      | 894.10022       | 670.82698       | V           | 936.48976      | 468.74852       | 312.83477       | 234.87790       | 8  |
| 23 | 60.04439  | 2767.31814     | 1384.16271      | 923.11090       | 692.58499       | S           | 837.42134      | 419.21431       | 279.81196       | 210.11079       | 7  |
| 24 | 72.08078  | 2866.38655     | 1433.69691      | 956.13370       | 717.35210       | V           | 750.38931      | 375.69829       | 250.80129       | 188.35279       | 6  |
| 25 | 136.07569 | 3029.44988     | 1515.22858      | 1010.48814      | 758.11793       | Y           | 651.32090      | 326.16409       | 217.77848       | 163.58568       | 5  |
| 26 | 44.04948  | 3100.48699     | 1550.74713      | 1034.16718      | 775.87721       | A           | 488.25757      | 244.63242       | 163.42404       | 122.81985       | 4  |
| 27 | 101.07094 | 3228.54557     | 1614.77642      | 1076.85337      | 807.89185       | Q           | 417.22046      | 209.11387       | 139.74500       | 105.06057       | 3  |
| 28 | 87.05529  | 3342.58850     | 1671.79789      | 1114.86768      | 836.40258       | N           | 289.16188      | 145.08458       | 97.05881        | 73.04593        | 2  |
| 29 | 129.11347 |                |                 |                 |                 | R           | 175.11895      | 88.06311        | 59.04450        | 44.53520        | 1  |

JM\_NDplasmaBVM\_TMT\_Fr3.raw #97079 RT: 278.5980 min  
 FTMS, 879.4409@hcd35.00, z=+4, Mono m/z=879.44092 Da, MH+=3514.74184 Da, Match Tol.=0.02 Da

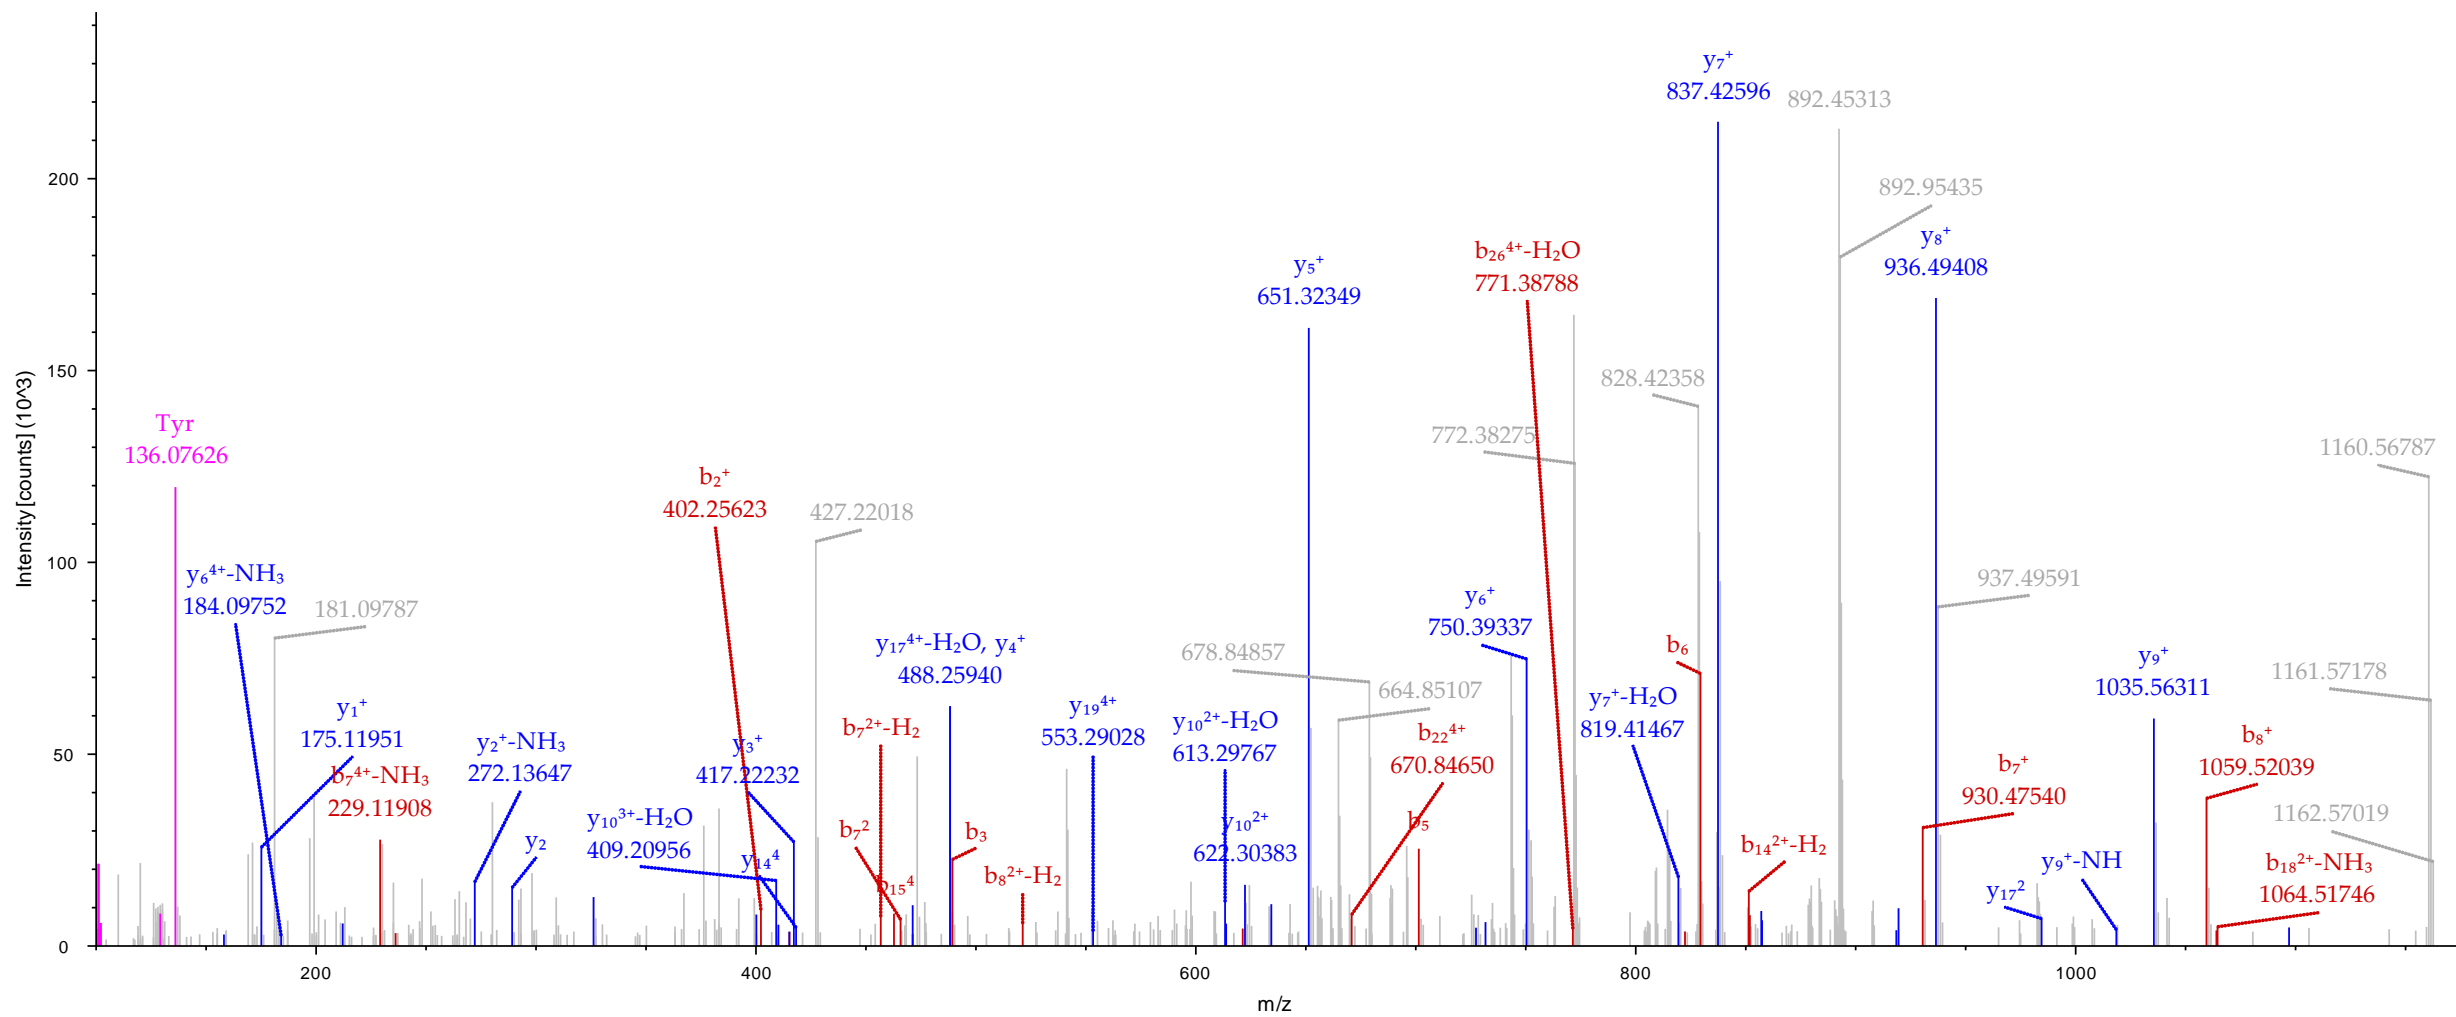

— Pre+H, Precursor, Precursor-H<sub>2</sub>O, Precursor-H<sub>2</sub>O-NH<sub>3</sub>, Precursor-NH<sub>3</sub>, Pre-H  
— y, y-H<sub>2</sub>O, y-NH<sub>3</sub>  
— Immorium  
— b, b-H<sub>2</sub>O, b-NH<sub>3</sub>



| #1 | Immonium  | b <sup>+</sup> | b <sup>2+</sup> | b <sup>3+</sup> | Seq.       | y <sup>+</sup> | y <sup>2+</sup> | y <sup>3+</sup> | #2 |
|----|-----------|----------------|-----------------|-----------------|------------|----------------|-----------------|-----------------|----|
| 1  | 315.25936 | 343.25427      | 172.13077       | 115.08961       | I-TMT6plex |                |                 |                 | 18 |
| 2  | 60.04439  | 430.28630      | 215.64679       | 144.10028       | S          | 2371.04513     | 1186.02620      | 791.01990       | 17 |
| 3  | 120.08078 | 577.35471      | 289.18100       | 193.12309       | F          | 2284.01310     | 1142.51019      | 762.00922       | 16 |
| 4  | 88.03930  | 692.38166      | 346.69447       | 231.46540       | D          | 2136.94469     | 1068.97598      | 712.98641       | 15 |
| 5  | 70.06513  | 789.43442      | 395.22085       | 263.81632       | P          | 2021.91775     | 1011.46251      | 674.64410       | 14 |
| 6  | 101.07094 | 917.49300      | 459.25014       | 306.50252       | Q          | 1924.86498     | 962.93613       | 642.29318       | 13 |
| 7  | 88.03930  | 1032.51994     | 516.76361       | 344.84483       | D          | 1796.80641     | 898.90684       | 599.60699       | 12 |
| 8  | 74.06004  | 1133.56762     | 567.28745       | 378.52739       | T          | 1681.77946     | 841.39337       | 561.26467       | 11 |
| 9  | 120.08078 | 1280.63603     | 640.82166       | 427.55020       | F          | 1580.73178     | 790.86953       | 527.58211       | 10 |
| 10 | 102.05496 | 1409.67863     | 705.34295       | 470.56439       | E          | 1433.66337     | 717.33532       | 478.55931       | 9  |
| 11 | 60.04439  | 1496.71066     | 748.85897       | 499.57507       | S          | 1304.62078     | 652.81403       | 435.54511       | 8  |
| 12 | 102.05496 | 1625.75325     | 813.38026       | 542.58927       | E          | 1217.58875     | 609.29801       | 406.53443       | 7  |
| 13 | 120.08078 | 1772.82166     | 886.91447       | 591.61207       | F          | 1088.54616     | 544.77672       | 363.52024       | 6  |
| 14 | 181.06077 | 1980.87007     | 990.93867       | 660.96154       | Y-Nitro    | 941.47774      | 471.24251       | 314.49743       | 5  |
| 15 | 86.09643  | 2093.95413     | 1047.48070      | 698.65623       | L          | 733.42934      | 367.21831       | 245.14796       | 4  |
| 16 | 88.03930  | 2208.98108     | 1104.99418      | 736.99854       | D          | 620.34527      | 310.67627       | 207.45328       | 3  |
| 17 | 102.05496 | 2338.02367     | 1169.51547      | 780.01274       | E          | 505.31833      | 253.16280       | 169.11096       | 2  |
| 18 | 330.27026 |                |                 |                 | K-TMT6plex | 376.27574      | 188.64151       | 126.09676       | 1  |

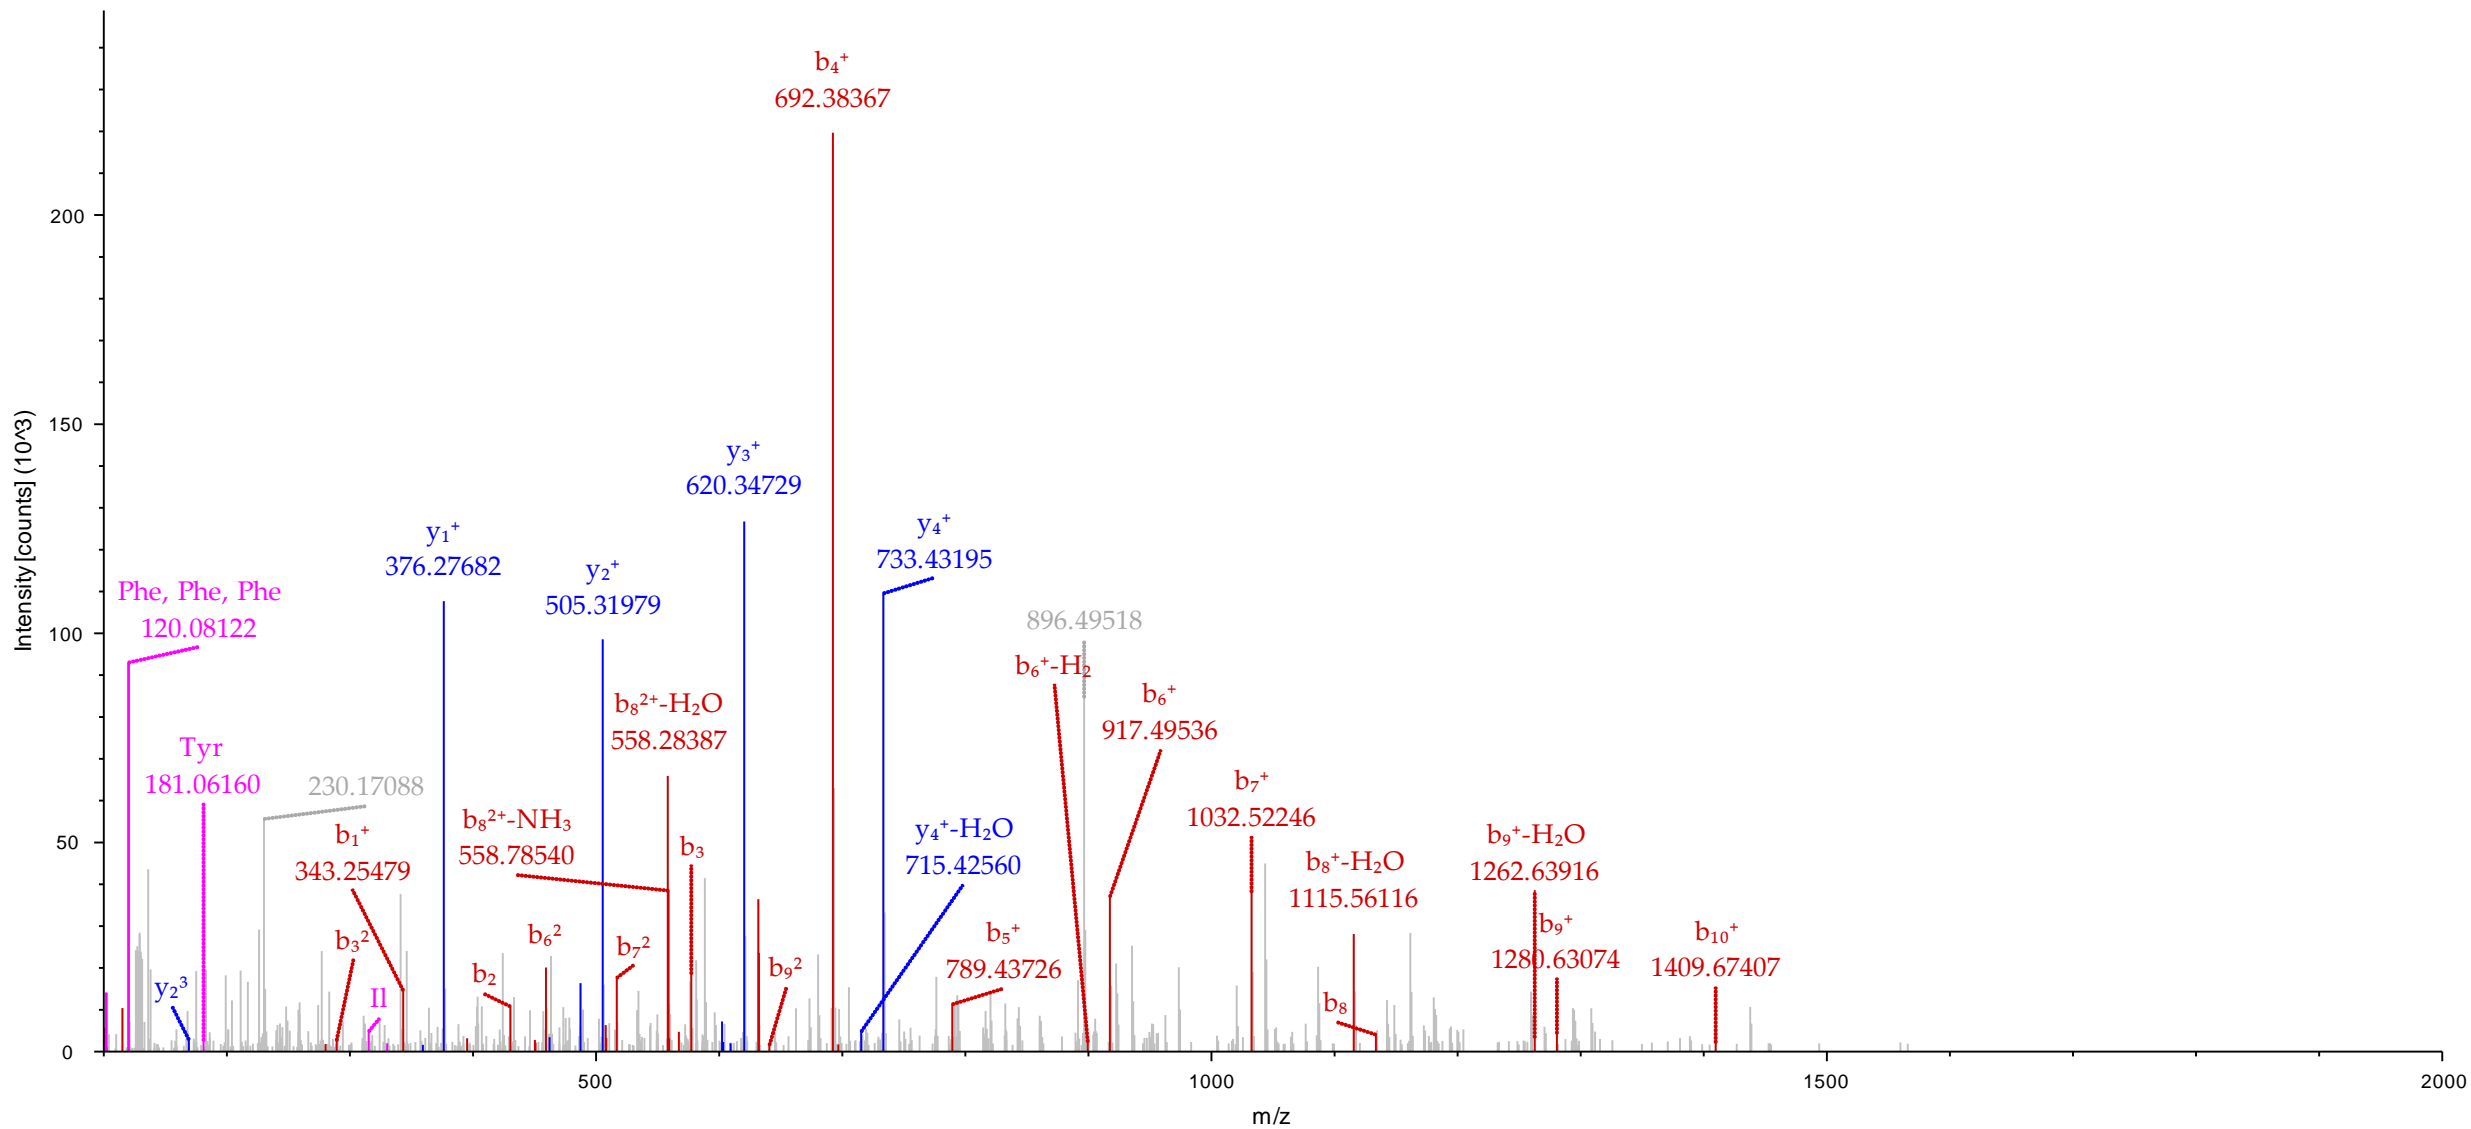

— Pre+H, Precursor, Precursor-H<sub>2</sub>O, Precursor-H<sub>2</sub>O-NH<sub>3</sub>, Precursor-NH<sub>3</sub>, Pre-H   
 — Immonium  
— y, y-H<sub>2</sub>O, y-NH<sub>3</sub>   
 — b, b-H<sub>2</sub>O, b-NH<sub>3</sub>

| #1 | Immonium  | b <sup>+</sup> | b <sup>2+</sup> | b <sup>3+</sup> | Seq.       | y <sup>+</sup> | y <sup>2+</sup> | y <sup>3+</sup> | #2 |
|----|-----------|----------------|-----------------|-----------------|------------|----------------|-----------------|-----------------|----|
| 1  | 273.21241 | 301.20732      | 151.10730       | 101.07396       | A-TMT6plex |                |                 |                 | 19 |
| 2  | 86.09643  | 414.29139      | 207.64933       | 138.76865       | L          | 2362.14004     | 1181.57366      | 788.05153       | 18 |
| 3  | 181.06077 | 622.33979      | 311.67353       | 208.11812       | Y-Nitro    | 2249.05597     | 1125.03162      | 750.35684       | 17 |
| 4  | 101.07094 | 750.39837      | 375.70282       | 250.80431       | Q          | 2041.00757     | 1021.00742      | 681.00737       | 16 |
| 5  | 74.06004  | 851.44605      | 426.22666       | 284.48687       | T          | 1912.94899     | 956.97813       | 638.32118       | 15 |
| 6  | 102.05496 | 980.48864      | 490.74796       | 327.50106       | E          | 1811.90131     | 906.45429       | 604.63862       | 14 |
| 7  | 44.04948  | 1051.52576     | 526.26652       | 351.18010       | A          | 1682.85872     | 841.93300       | 561.62442       | 13 |
| 8  | 120.08078 | 1198.59417     | 599.80072       | 400.20291       | F          | 1611.82160     | 806.41444       | 537.94539       | 12 |
| 9  | 74.06004  | 1299.64185     | 650.32456       | 433.88547       | T          | 1464.75319     | 732.88023       | 488.92258       | 11 |
| 10 | 44.04948  | 1370.67896     | 685.84312       | 457.56450       | A          | 1363.70551     | 682.35639       | 455.24002       | 10 |
| 11 | 88.03930  | 1485.70590     | 743.35659       | 495.90682       | D          | 1292.66840     | 646.83784       | 431.56098       | 9  |
| 12 | 120.08078 | 1632.77432     | 816.89080       | 544.92962       | F          | 1177.64145     | 589.32437       | 393.21867       | 8  |
| 13 | 101.07094 | 1760.83290     | 880.92009       | 587.61582       | Q          | 1030.57304     | 515.79016       | 344.19586       | 7  |
| 14 | 101.07094 | 1888.89147     | 944.94937       | 630.30201       | Q          | 902.51446      | 451.76087       | 301.50967       | 6  |
| 15 | 70.06513  | 1985.94424     | 993.47576       | 662.65293       | P          | 774.45589      | 387.73158       | 258.82348       | 5  |
| 16 | 74.06004  | 2086.99192     | 1043.99960      | 696.33549       | T          | 677.40312      | 339.20520       | 226.47256       | 4  |
| 17 | 102.05496 | 2216.03451     | 1108.52089      | 739.34969       | E          | 576.35544      | 288.68136       | 192.79000       | 3  |
| 18 | 44.04948  | 2287.07162     | 1144.03945      | 763.02873       | A          | 447.31285      | 224.16006       | 149.77580       | 2  |
| 19 | 330.27026 |                |                 |                 | K-TMT6plex | 376.27574      | 188.64151       | 126.09676       | 1  |

JM\_NDplasmaBVM\_TMT\_NoFrac.raw #92334 RT: 262.7506 min  
 FTMS, 888.4650@hcd35.00, z=+3, Mono m/z=888.13098 Da, MH+=2662.37839 Da, Match Tol.=0.02 Da

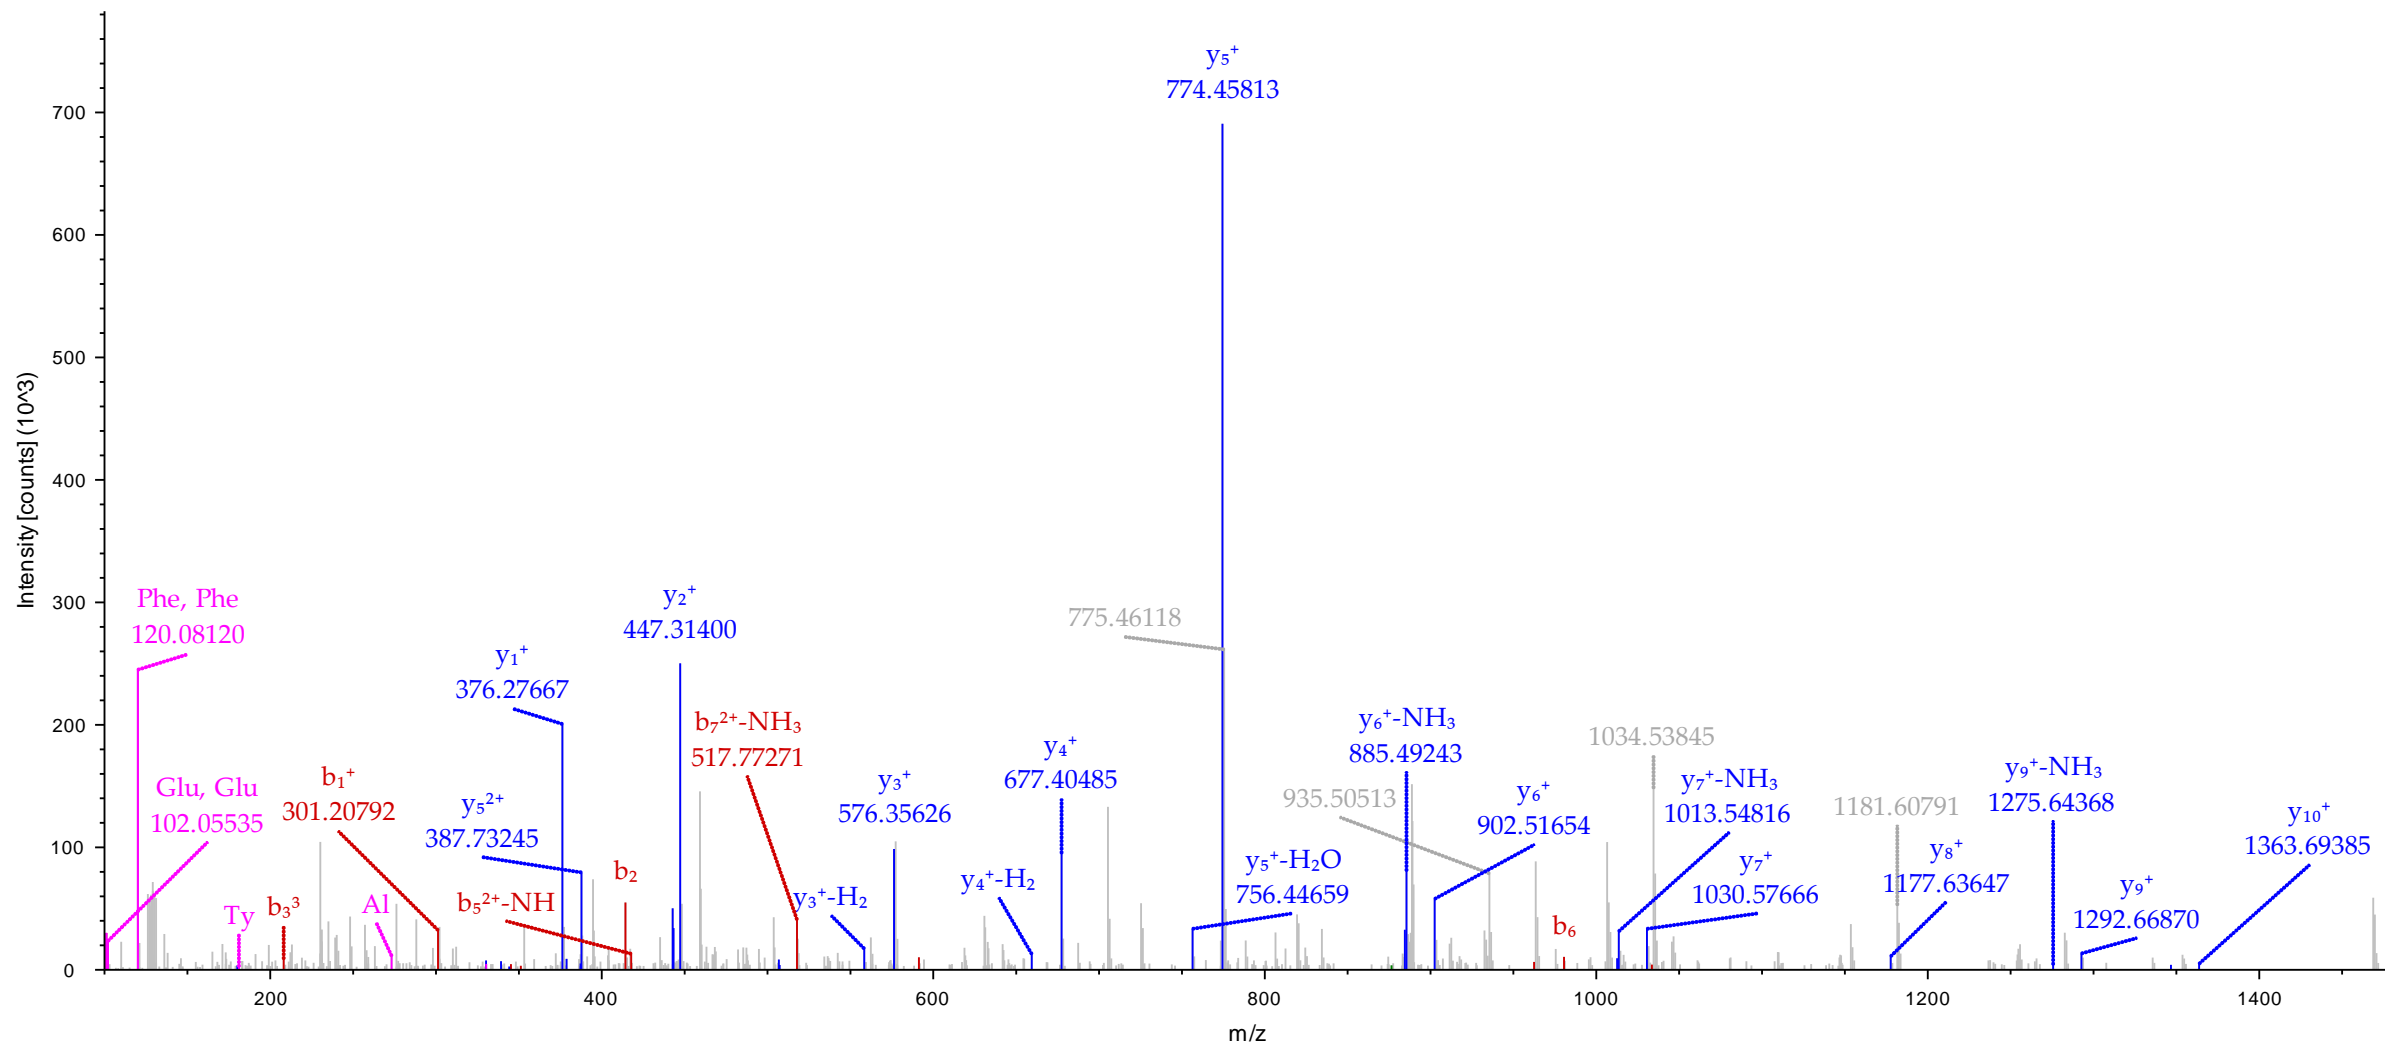

— Pre+H, Precursor, Precursor-H<sub>2</sub>O, Precursor-H<sub>2</sub>O-NH<sub>3</sub>, Precursor-NH<sub>3</sub>, Pre-H  
— y, y-H<sub>2</sub>O, y-NH<sub>3</sub>  
— Immonium  
— b, b-H<sub>2</sub>O, b-NH<sub>3</sub>

| #1 | Immonium  | b <sup>+</sup> | b <sup>2+</sup> | b <sup>3+</sup> | Seq.              | y <sup>+</sup> | y <sup>2+</sup> | y <sup>3+</sup> | #2 |
|----|-----------|----------------|-----------------|-----------------|-------------------|----------------|-----------------|-----------------|----|
| 1  | 317.20224 | 345.19715      | 173.10221       | 115.73723       | D-TMT6plex        |                |                 |                 | 34 |
| 2  | 30.03383  | 402.21862      | 201.61295       | 134.74439       | G                 | 3518.62026     | 1759.81377      | 1173.54494      | 33 |
| 3  | 120.08078 | 549.28703      | 275.14715       | 183.76719       | F                 | 3461.59880     | 1731.30304      | 1154.53778      | 32 |
| 4  | 72.08078  | 648.35544      | 324.68136       | 216.79000       | V                 | 3314.53038     | 1657.76883      | 1105.51498      | 31 |
| 5  | 101.07094 | 776.41402      | 388.71065       | 259.47619       | Q                 | 3215.46197     | 1608.23462      | 1072.49217      | 30 |
| 6  | 30.03383  | 833.43548      | 417.22138       | 278.48335       | G                 | 3087.40339     | 1544.20533      | 1029.80598      | 29 |
| 7  | 102.05496 | 962.47808      | 481.74268       | 321.49754       | E                 | 3030.38193     | 1515.69460      | 1010.79883      | 28 |
| 8  | 30.03383  | 1019.49954     | 510.25341       | 340.50470       | G                 | 2901.33933     | 1451.17331      | 967.78463       | 27 |
| 9  | 74.06004  | 1120.54722     | 560.77725       | 374.18726       | T                 | 2844.31787     | 1422.66257      | 948.77747       | 26 |
| 10 | 120.04776 | 1267.58262     | 634.29495       | 423.19906       | M-Oxidation       | 2743.27019     | 1372.13873      | 915.09491       | 25 |
| 11 | 72.08078  | 1366.65103     | 683.82915       | 456.22186       | V                 | 2596.23479     | 1298.62103      | 866.08312       | 24 |
| 12 | 70.06513  | 1463.70380     | 732.35554       | 488.57278       | P                 | 2497.16638     | 1249.08683      | 833.06031       | 23 |
| 13 | 72.08078  | 1562.77221     | 781.88974       | 521.59559       | V                 | 2400.11361     | 1200.56045      | 800.70939       | 22 |
| 14 | 30.03383  | 1619.79367     | 810.40048       | 540.60274       | G                 | 2301.04520     | 1151.02624      | 767.68658       | 21 |
| 15 | 101.07094 | 1747.85225     | 874.42976       | 583.28893       | Q                 | 2244.02374     | 1122.51551      | 748.67943       | 20 |
| 16 | 60.04439  | 1834.88428     | 917.94578       | 612.29961       | S                 | 2115.96516     | 1058.48622      | 705.99324       | 19 |
| 17 | 72.08078  | 1933.95269     | 967.47999       | 645.32242       | V                 | 2028.93313     | 1014.97020      | 676.98256       | 18 |
| 18 | 72.08078  | 2033.02111     | 1017.01419      | 678.34522       | V                 | 1929.86472     | 965.43600       | 643.95976       | 17 |
| 19 | 181.06077 | 2241.06951     | 1121.03840      | 747.69469       | Y-Nitro           | 1830.79630     | 915.90179       | 610.93695       | 16 |
| 20 | 44.04948  | 2312.10663     | 1156.55695      | 771.37373       | A                 | 1622.74790     | 811.87759       | 541.58748       | 15 |
| 21 | 133.04301 | 2472.13728     | 1236.57228      | 824.71728       | C-Carbamidomethyl | 1551.71078     | 776.35903       | 517.90845       | 14 |
| 22 | 88.03930  | 2587.16422     | 1294.08575      | 863.05959       | D                 | 1391.68013     | 696.34371       | 464.56490       | 13 |
| 23 | 102.05496 | 2716.20681     | 1358.60704      | 906.07379       | E                 | 1276.65319     | 638.83023       | 426.22258       | 12 |
| 24 | 30.03383  | 2773.22828     | 1387.11778      | 925.08094       | G                 | 1147.61060     | 574.30894       | 383.20838       | 11 |
| 25 | 136.07569 | 2936.29160     | 1468.64944      | 979.43539       | Y                 | 1090.58914     | 545.79821       | 364.20123       | 10 |
| 26 | 60.04439  | 3023.32363     | 1512.16545      | 1008.44606      | S                 | 927.52581      | 464.26654       | 309.84679       | 9  |
| 27 | 86.09643  | 3136.40770     | 1568.70749      | 1046.14075      | L                 | 840.49378      | 420.75053       | 280.83611       | 8  |
| 28 | 86.09643  | 3249.49176     | 1625.24952      | 1083.83544      | I                 | 727.40971      | 364.20850       | 243.14142       | 7  |
| 29 | 30.03383  | 3306.51322     | 1653.76025      | 1102.84259      | G                 | 614.32565      | 307.66646       | 205.44673       | 6  |
| 30 | 88.03930  | 3421.54017     | 1711.27372      | 1141.18491      | D                 | 557.30419      | 279.15573       | 186.43958       | 5  |
| 31 | 70.06513  | 3518.59293     | 1759.80010      | 1173.53583      | P                 | 442.27724      | 221.64226       | 148.09727       | 4  |
| 32 | 72.08078  | 3617.66134     | 1809.33431      | 1206.55863      | V                 | 345.22448      | 173.11588       | 115.74634       | 3  |
| 33 | 44.04948  | 3688.69846     | 1844.85287      | 1230.23767      | A                 | 246.15607      | 123.58167       | 82.72354        | 2  |
| 34 | 129.11347 |                |                 |                 | R                 | 175.11895      | 88.06311        | 59.04450        | 1  |

JM\_NDplasmaBVM\_TMT\_Fr1.raw #77718 RT: 255.2124 min  
 FTMS, 1287.2883@hcd35.00, z=+3, Mono m/z=1287.2883 Da, MH+=3859.85044 Da, Match Tol.=0.02 Da

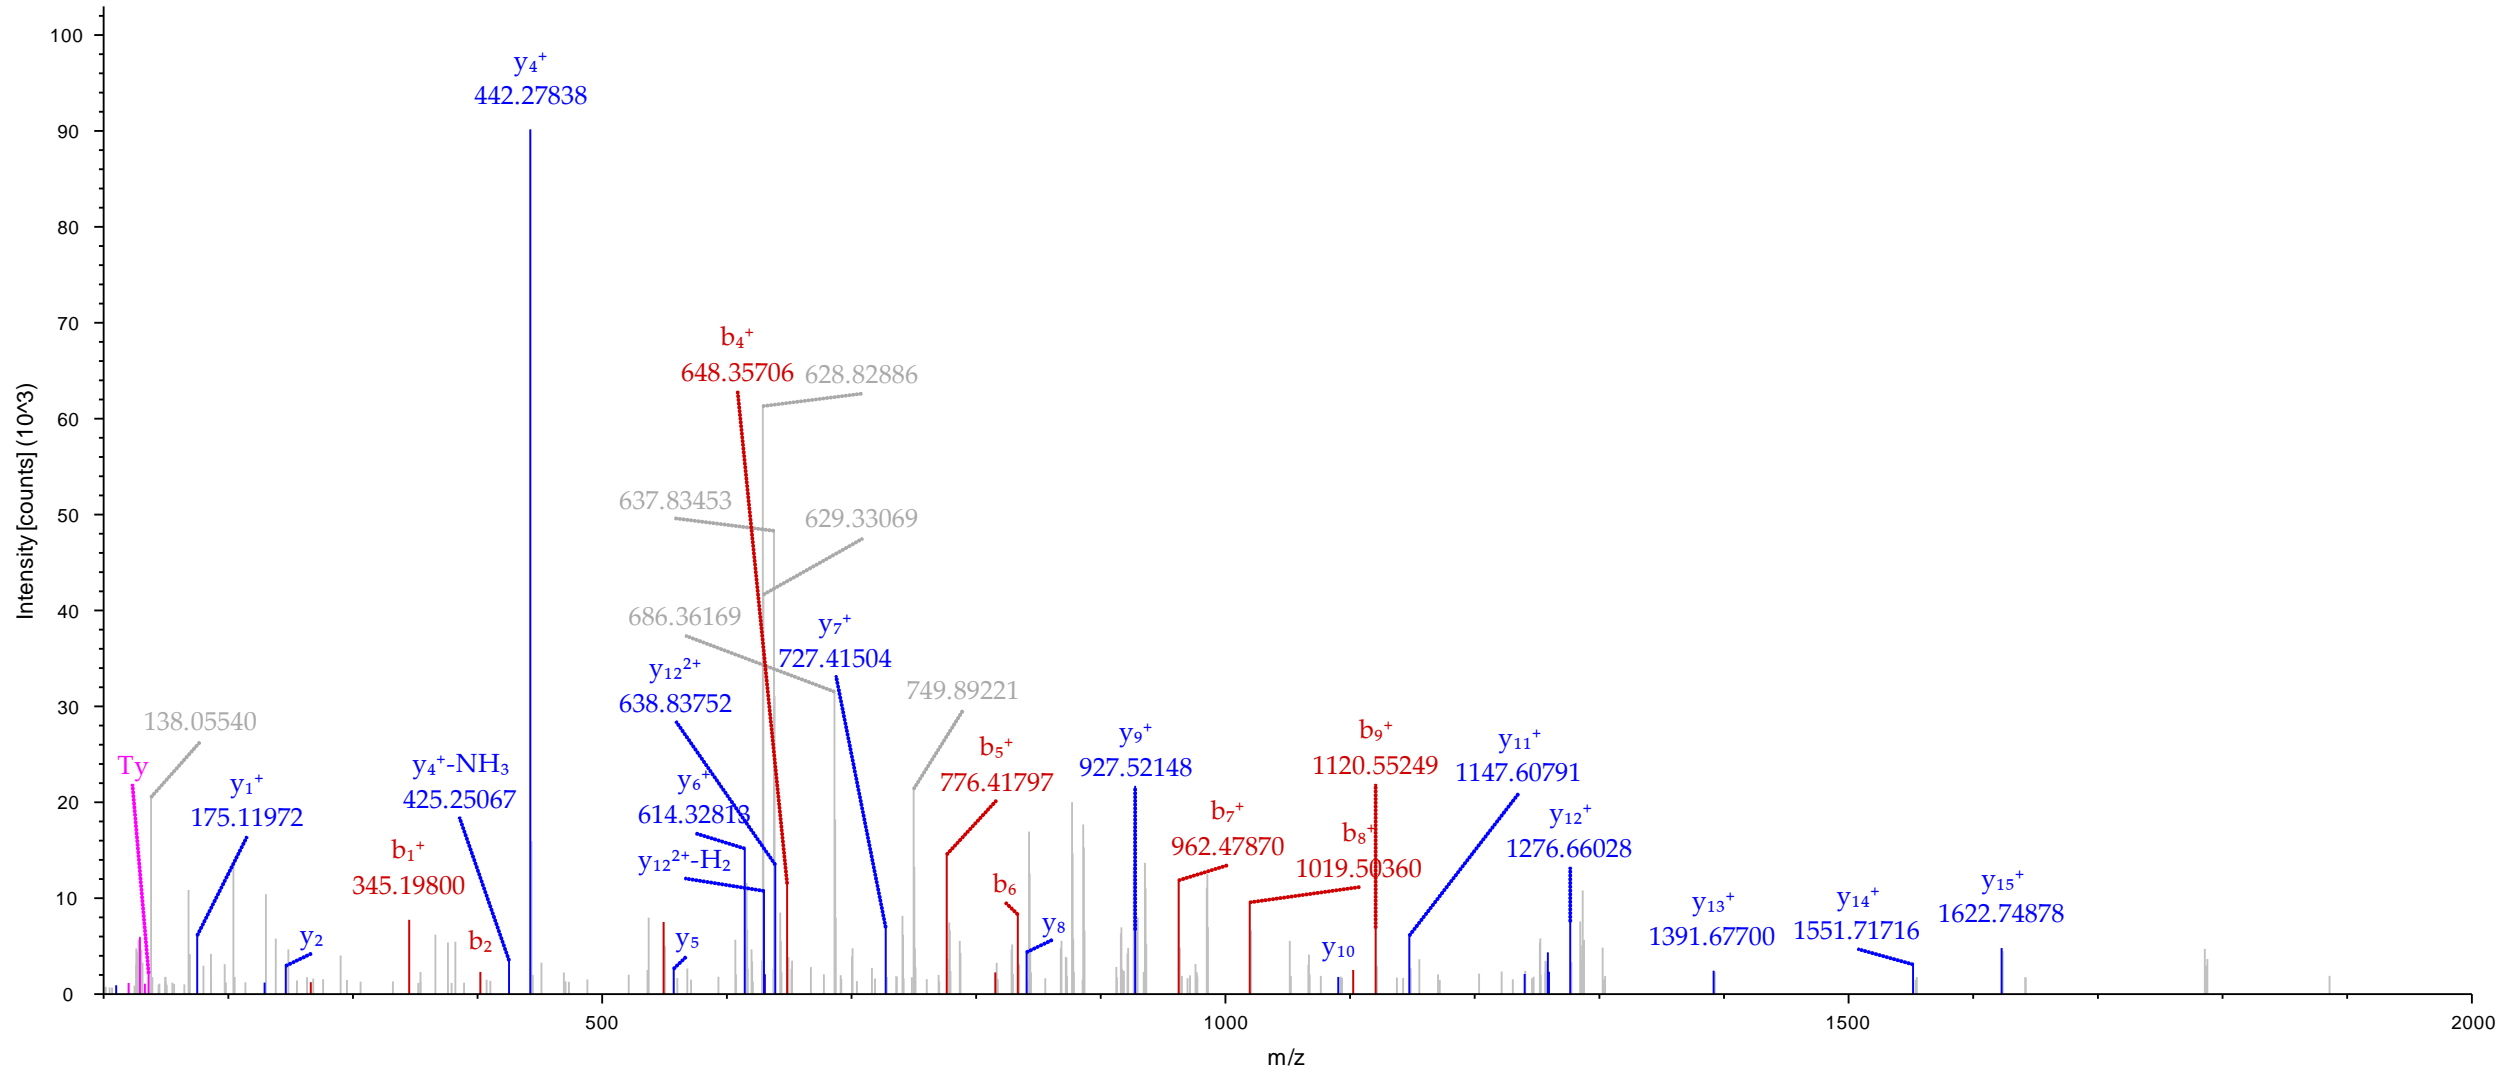

— Pre+H, Precursor, Precursor-H<sub>2</sub>O, Precursor-H<sub>2</sub>O-NH<sub>3</sub>, Precursor-NH<sub>3</sub>, Pre-H

—  $y$ ,  $y - H_2O$ ,  $y - NH_3$

— Immonium

—  $b$ ,  $b - H_2O$ ,  $b - NH_3$

| #1 | Immonium  | b <sup>+</sup> | b <sup>2+</sup> | b <sup>3+</sup> | b <sup>4+</sup> | b <sup>5+</sup> | Seq.                       | y <sup>+</sup> | y <sup>2+</sup> | y <sup>3+</sup> | y <sup>4+</sup> | y <sup>5+</sup> | #2 |
|----|-----------|----------------|-----------------|-----------------|-----------------|-----------------|----------------------------|----------------|-----------------|-----------------|-----------------|-----------------|----|
| 1  | 362.20594 | 390.20086      | 195.60407       | 130.73847       | 98.30567        | 78.84599        | C-TMT6plex-Carbamidomethyl |                |                 |                 |                 |                 | 37 |
| 2  | 30.03383  | 447.22232      | 224.11480       | 149.74562       | 112.56104       | 90.25029        | G                          | 4679.29036     | 2340.14882      | 1560.43497      | 1170.57805      | 936.66389       | 36 |
| 3  | 70.06513  | 544.27508      | 272.64118       | 182.09655       | 136.82423       | 109.66084       | P                          | 4622.26890     | 2311.63809      | 1541.42782      | 1156.32268      | 925.25960       | 35 |
| 4  | 70.06513  | 641.32785      | 321.16756       | 214.44747       | 161.08742       | 129.07139       | P                          | 4525.21613     | 2263.11170      | 1509.07690      | 1132.05949      | 905.84905       | 34 |
| 5  | 70.06513  | 738.38061      | 369.69394       | 246.79839       | 185.35061       | 148.48194       | P                          | 4428.16337     | 2214.58532      | 1476.72597      | 1107.79630      | 886.43850       | 33 |
| 6  | 70.06513  | 835.43338      | 418.22033       | 279.14931       | 209.61380       | 167.89250       | P                          | 4331.11060     | 2166.05894      | 1444.37505      | 1083.53311      | 867.02794       | 32 |
| 7  | 86.09643  | 948.51744      | 474.76236       | 316.84400       | 237.88482       | 190.50931       | I                          | 4234.05784     | 2117.53256      | 1412.02413      | 1059.26992      | 847.61739       | 31 |
| 8  | 88.03930  | 1063.54438     | 532.27583       | 355.18631       | 266.64155       | 213.51470       | D                          | 4120.97378     | 2060.99053      | 1374.32944      | 1030.99890      | 825.00058       | 30 |
| 9  | 87.05529  | 1177.58731     | 589.29729       | 393.20062       | 295.15229       | 236.32328       | N                          | 4005.94683     | 2003.47706      | 1335.98713      | 1002.24217      | 801.99519       | 29 |
| 10 | 30.03383  | 1234.60877     | 617.80803       | 412.20778       | 309.40765       | 247.72758       | G                          | 3891.90391     | 1946.45559      | 1297.97282      | 973.73143       | 779.18660       | 28 |
| 11 | 88.03930  | 1349.63572     | 675.32150       | 450.55009       | 338.16439       | 270.73296       | D                          | 3834.88244     | 1917.94486      | 1278.96567      | 959.47607       | 767.78231       | 27 |
| 12 | 86.09643  | 1462.71978     | 731.86353       | 488.24478       | 366.43540       | 293.34978       | I                          | 3719.85550     | 1860.43139      | 1240.62335      | 930.71933       | 744.77692       | 26 |
| 13 | 74.06004  | 1563.76746     | 782.38737       | 521.92734       | 391.69732       | 313.55931       | T                          | 3606.77144     | 1803.88936      | 1202.92866      | 902.44832       | 722.16011       | 25 |
| 14 | 60.04439  | 1650.79949     | 825.90338       | 550.93801       | 413.45533       | 330.96572       | S                          | 3505.72376     | 1753.36552      | 1169.24610      | 877.18640       | 701.95057       | 24 |
| 15 | 86.09643  | 1763.88355     | 882.44541       | 588.63270       | 441.72635       | 353.58253       | L                          | 3418.69173     | 1709.84950      | 1140.23543      | 855.42839       | 684.54417       | 23 |
| 16 | 60.04439  | 1850.91558     | 925.96143       | 617.64338       | 463.48435       | 370.98894       | S                          | 3305.60767     | 1653.30747      | 1102.54074      | 827.15737       | 661.92735       | 22 |
| 17 | 86.09643  | 1963.99964     | 982.50346       | 655.33807       | 491.75537       | 393.60575       | L                          | 3218.57564     | 1609.79146      | 1073.53006      | 805.39937       | 644.52095       | 21 |
| 18 | 70.06513  | 2061.05241     | 1031.02984      | 687.68899       | 516.01856       | 413.01630       | P                          | 3105.49157     | 1553.24942      | 1035.83538      | 777.12835       | 621.90414       | 20 |
| 19 | 102.05496 | 2190.09500     | 1095.55114      | 730.70318       | 548.27921       | 438.82482       | E                          | 3008.43881     | 1504.72304      | 1003.48445      | 752.86516       | 602.49358       | 19 |
| 20 | 136.07569 | 2353.15833     | 1177.08280      | 785.05763       | 589.04504       | 471.43749       | Y                          | 2879.39622     | 1440.20175      | 960.47026       | 720.60451       | 576.68506       | 18 |
| 21 | 102.05496 | 2482.20092     | 1241.60410      | 828.07183       | 621.30569       | 497.24601       | E                          | 2716.33289     | 1358.67008      | 906.11581       | 679.83868       | 544.07240       | 17 |
| 22 | 70.06513  | 2579.25369     | 1290.13048      | 860.42275       | 645.56888       | 516.65656       | P                          | 2587.29030     | 1294.14879      | 863.10162       | 647.57803       | 518.26388       | 16 |
| 23 | 120.08078 | 2726.32210     | 1363.66469      | 909.44555       | 682.33598       | 546.07024       | F                          | 2490.23753     | 1245.62240      | 830.75069       | 623.31484       | 498.85333       | 15 |
| 24 | 60.04439  | 2813.35413     | 1407.18070      | 938.45623       | 704.09399       | 563.47665       | S                          | 2343.16912     | 1172.08820      | 781.72789       | 586.54774       | 469.43964       | 14 |
| 25 | 60.04439  | 2900.38616     | 1450.69672      | 967.46690       | 725.85200       | 580.88305       | S                          | 2256.13709     | 1128.57218      | 752.71721       | 564.78973       | 452.03324       | 13 |
| 26 | 72.08078  | 2999.45457     | 1500.23092      | 1000.48971      | 750.61910       | 600.69674       | V                          | 2169.10506     | 1085.05617      | 723.70654       | 543.03172       | 434.62683       | 12 |
| 27 | 88.03930  | 3114.48151     | 1557.74439      | 1038.83202      | 779.37584       | 623.70212       | D                          | 2070.03665     | 1035.52196      | 690.68373       | 518.26462       | 414.81315       | 11 |
| 28 | 181.06077 | 3322.52992     | 1661.76860      | 1108.18149      | 831.38794       | 665.31181       | Y-Nitro                    | 1955.00970     | 978.00849       | 652.34142       | 489.50788       | 391.80776       | 10 |
| 29 | 101.07094 | 3450.58850     | 1725.79789      | 1150.86768      | 863.40258       | 690.92352       | Q                          | 1746.96130     | 873.98429       | 582.99195       | 437.49578       | 350.19808       | 9  |
| 30 | 133.04301 | 3610.61915     | 1805.81321      | 1204.21123      | 903.41024       | 722.92965       | C-Carbamidomethyl          | 1618.90272     | 809.95500       | 540.30576       | 405.48114       | 324.58637       | 8  |
| 31 | 101.07094 | 3738.67772     | 1869.84250      | 1246.89743      | 935.42489       | 748.54137       | Q                          | 1458.87207     | 729.93967       | 486.96221       | 365.47348       | 292.58024       | 7  |
| 32 | 330.27026 | 4095.93562     | 2048.47145      | 1365.98339      | 1024.73936      | 819.99294       | K-TMT6plex                 | 1330.81349     | 665.91039       | 444.27602       | 333.45883       | 266.96852       | 6  |
| 33 | 181.06077 | 4303.98402     | 2152.49565      | 1435.33286      | 1076.75146      | 861.60263       | Y-Nitro                    | 973.55560      | 487.28144       | 325.19005       | 244.14436       | 195.51694       | 5  |
| 34 | 136.07569 | 4467.04735     | 2234.02731      | 1489.68730      | 1117.51730      | 894.21529       | Y                          | 765.50719      | 383.25723       | 255.84058       | 192.13226       | 153.90726       | 4  |
| 35 | 86.09643  | 4580.13142     | 2290.56935      | 1527.38199      | 1145.78831      | 916.83210       | L                          | 602.44386      | 301.72557       | 201.48614       | 151.36642       | 121.29459       | 3  |
| 36 | 86.09643  | 4693.21548     | 2347.11138      | 1565.07668      | 1174.05933      | 939.44892       | L                          | 489.35980      | 245.18354       | 163.79145       | 123.09541       | 98.67778        | 2  |
| 37 | 330.27026 |                |                 |                 |                 |                 | K-TMT6plex                 | 376.27574      | 188.64151       | 126.09676       | 94.82439        | 76.06097        | 1  |





| #1 | Immonium  | b <sup>+</sup> | b <sup>2+</sup> | b <sup>3+</sup> | b <sup>4+</sup> | Seq.       | y <sup>+</sup> | y <sup>2+</sup> | y <sup>3+</sup> | y <sup>4+</sup> | #2 |
|----|-----------|----------------|-----------------|-----------------|-----------------|------------|----------------|-----------------|-----------------|-----------------|----|
| 1  | 273.21241 | 301.20732      | 151.10730       | 101.07396       | 76.05729        | A-TMT6plex |                |                 |                 |                 | 23 |
| 2  | 86.09643  | 414.29139      | 207.64933       | 138.76865       | 104.32830       | I          | 2993.54428     | 1497.27578      | 998.51961       | 749.14153       | 22 |
| 3  | 101.07094 | 542.34996      | 271.67862       | 181.45484       | 136.34295       | Q          | 2880.46021     | 1440.73375      | 960.82492       | 720.87051       | 21 |
| 4  | 72.08078  | 641.41838      | 321.21283       | 214.47764       | 161.11005       | V          | 2752.40164     | 1376.70446      | 918.13873       | 688.85587       | 20 |
| 5  | 136.07569 | 804.48171      | 402.74449       | 268.83209       | 201.87588       | Y          | 2653.33322     | 1327.17025      | 885.11593       | 664.08876       | 19 |
| 6  | 181.06077 | 1012.53011     | 506.76869       | 338.18156       | 253.88799       | Y-Nitro    | 2490.26989     | 1245.63859      | 830.76148       | 623.32293       | 18 |
| 7  | 87.05529  | 1126.57304     | 563.79016       | 376.19586       | 282.39872       | N          | 2282.22149     | 1141.61438      | 761.41201       | 571.31083       | 17 |
| 8  | 70.06513  | 1223.62580     | 612.31654       | 408.54679       | 306.66191       | P          | 2168.17856     | 1084.59292      | 723.39770       | 542.80010       | 16 |
| 9  | 88.03930  | 1338.65275     | 669.83001       | 446.88910       | 335.41864       | D          | 2071.12580     | 1036.06654      | 691.04678       | 518.53691       | 15 |
| 10 | 101.07094 | 1466.71132     | 733.85930       | 489.57529       | 367.43329       | Q          | 1956.09885     | 978.55306       | 652.70447       | 489.78017       | 14 |
| 11 | 70.06513  | 1563.76409     | 782.38568       | 521.92621       | 391.69648       | P          | 1828.04028     | 914.52378       | 610.01828       | 457.76553       | 13 |
| 12 | 70.06513  | 1660.81685     | 830.91206       | 554.27714       | 415.95967       | P          | 1730.98751     | 865.99739       | 577.66736       | 433.50234       | 12 |
| 13 | 330.27026 | 2018.07475     | 1009.54101      | 673.36310       | 505.27414       | K-TMT6plex | 1633.93475     | 817.47101       | 545.31643       | 409.23914       | 11 |
| 14 | 70.06513  | 2115.12751     | 1058.06739      | 705.71402       | 529.53734       | P          | 1276.67685     | 638.84206       | 426.23047       | 319.92467       | 10 |
| 15 | 30.03383  | 2172.14897     | 1086.57813      | 724.72118       | 543.79270       | G          | 1179.62409     | 590.31568       | 393.87955       | 295.66148       | 9  |
| 16 | 104.05285 | 2303.18946     | 1152.09837      | 768.40134       | 576.55282       | M          | 1122.60263     | 561.80495       | 374.87239       | 281.40611       | 8  |
| 17 | 86.09643  | 2416.27352     | 1208.64040      | 806.09603       | 604.82384       | I          | 991.56214      | 496.28471       | 331.19223       | 248.64599       | 7  |
| 18 | 88.03930  | 2531.30047     | 1266.15387      | 844.43834       | 633.58057       | D          | 878.47808      | 439.74268       | 293.49754       | 220.37498       | 6  |
| 19 | 60.04439  | 2618.33249     | 1309.66989      | 873.44902       | 655.33858       | S          | 763.45113      | 382.22921       | 255.15523       | 191.61824       | 5  |
| 20 | 44.04948  | 2689.36961     | 1345.18844      | 897.12805       | 673.09786       | A          | 676.41911      | 338.71319       | 226.14455       | 169.86023       | 4  |
| 21 | 74.06004  | 2790.41729     | 1395.71228      | 930.81061       | 698.35978       | T          | 605.38199      | 303.19463       | 202.46552       | 152.10096       | 3  |
| 22 | 101.07094 | 2918.47586     | 1459.74157      | 973.49681       | 730.37442       | Q          | 504.33431      | 252.67080       | 168.78296       | 126.83904       | 2  |
| 23 | 330.27026 |                |                 |                 |                 | K-TMT6plex | 376.27574      | 188.64151       | 126.09676       | 94.82439        | 1  |

JM\_NDplasmaBVM\_TMT\_Fr3.raw #45475 RT: 152.9211 min  
 FTMS, 823.9337@hcd35.00, z=+4, Mono m/z=823.93372 Da, MH+=3292.71303 Da, Match Tol.=0.02 Da

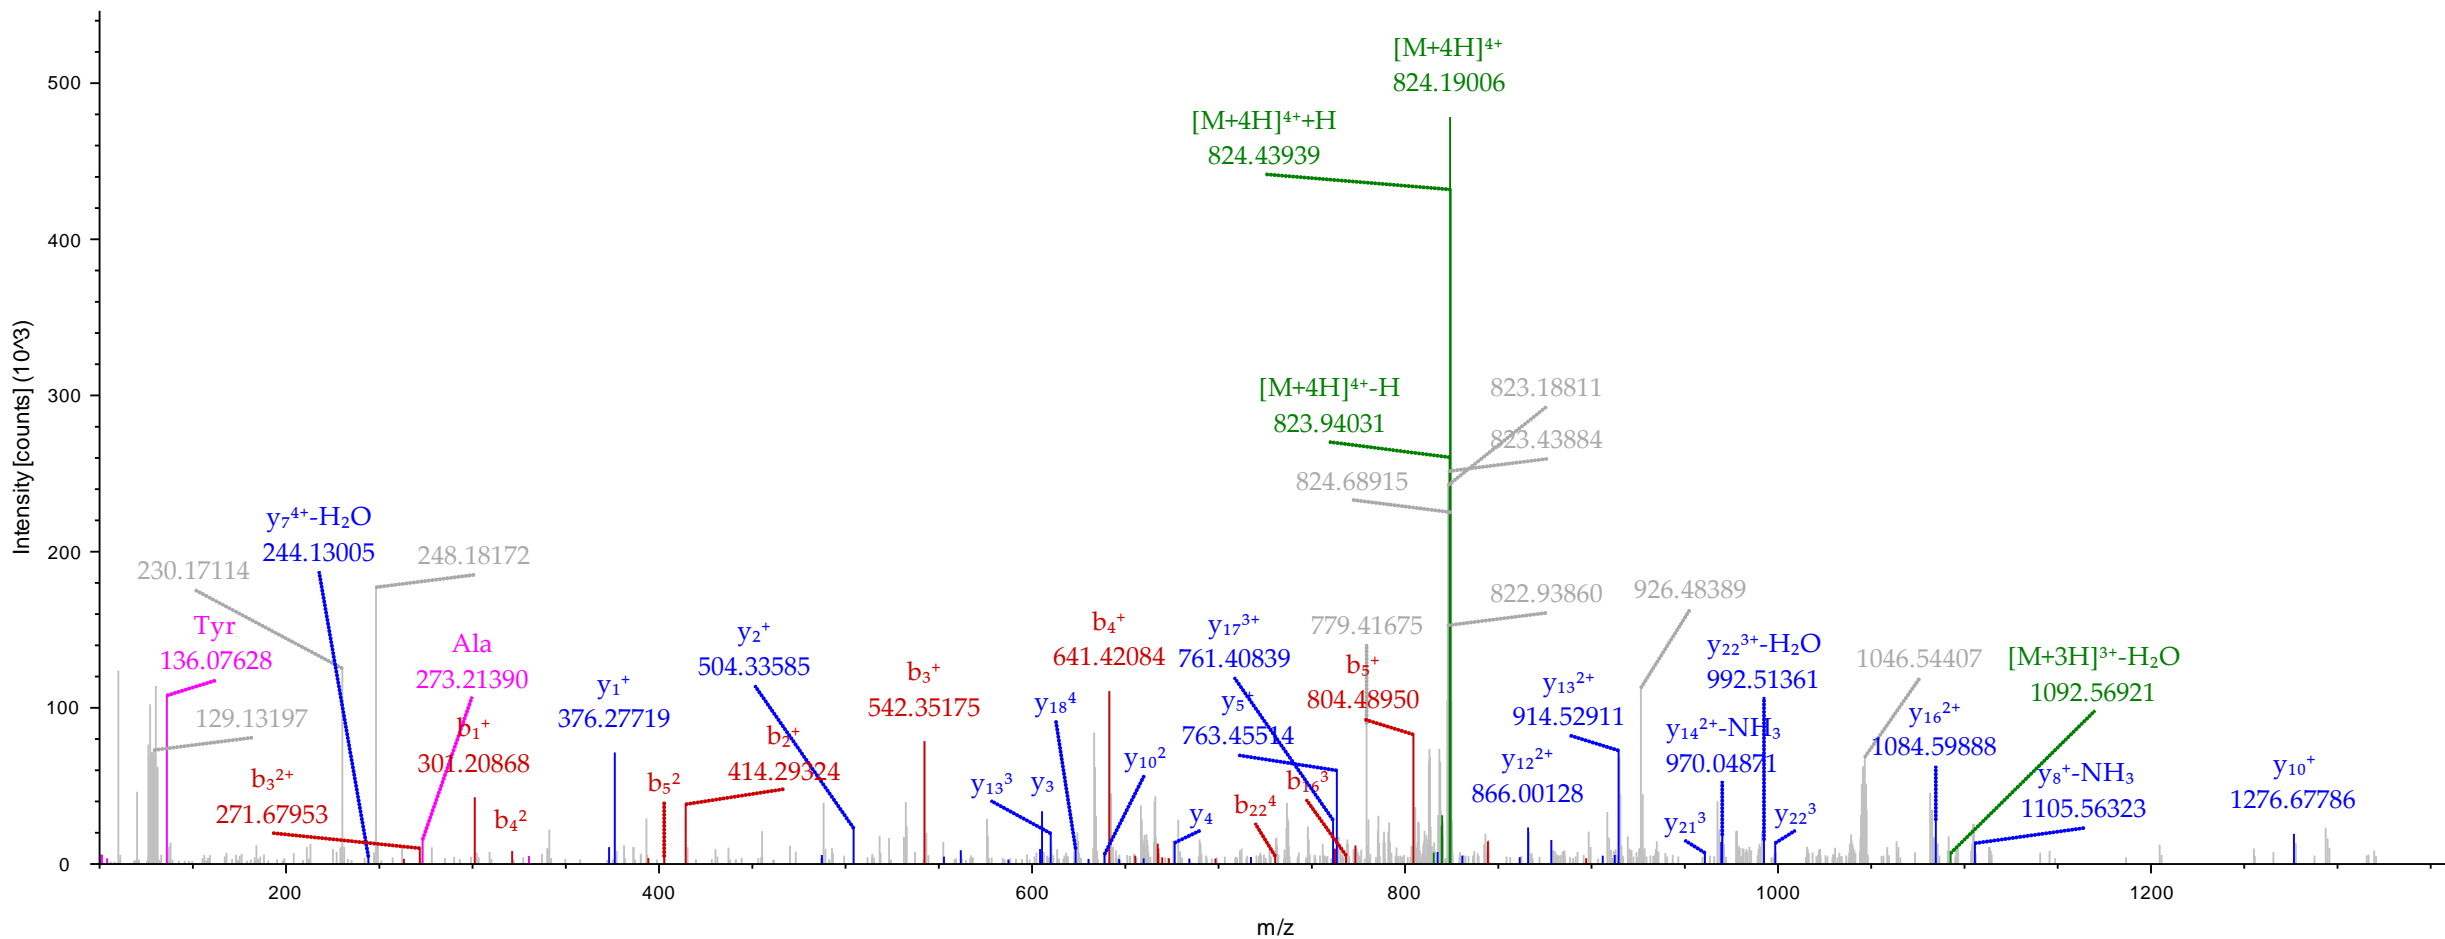

— Pre+H, Precursor, Precursor-H<sub>2</sub>O, Precursor-H<sub>2</sub>O-NH<sub>3</sub>, Precursor-NH<sub>3</sub>, Pre-H  
— y, y-H<sub>2</sub>O, y-NH<sub>3</sub>  
— Immonium  
— b, b-H<sub>2</sub>O, b-NH<sub>3</sub>

| #1 | Immonium  | b <sup>+</sup> | b <sup>2+</sup> | b <sup>3+</sup> | Seq.              | y <sup>+</sup> | y <sup>2+</sup> | y <sup>3+</sup> | #2 |
|----|-----------|----------------|-----------------|-----------------|-------------------|----------------|-----------------|-----------------|----|
| 1  | 330.23387 | 358.22879      | 179.61803       | 120.08111       | Q-TMT6plex        |                |                 |                 | 21 |
| 2  | 101.07094 | 486.28736      | 243.64732       | 162.76731       | Q                 | 2588.26525     | 1294.63627      | 863.42660       | 20 |
| 3  | 120.08078 | 633.35578      | 317.18153       | 211.79011       | F                 | 2460.20668     | 1230.60698      | 820.74041       | 19 |
| 4  | 86.09643  | 746.43984      | 373.72356       | 249.48480       | L                 | 2313.13826     | 1157.07277      | 771.71761       | 18 |
| 5  | 72.08078  | 845.50826      | 423.25777       | 282.50760       | V                 | 2200.05420     | 1100.53074      | 734.02292       | 17 |
| 6  | 136.07569 | 1008.57158     | 504.78943       | 336.86205       | Y                 | 2100.98578     | 1050.99653      | 701.00011       | 16 |
| 7  | 133.04301 | 1168.60223     | 584.80475       | 390.20560       | C-Carbamidomethyl | 1937.92246     | 969.46487       | 646.64567       | 15 |
| 8  | 102.05496 | 1297.64483     | 649.32605       | 433.21979       | E                 | 1777.89181     | 889.44954       | 593.30212       | 14 |
| 9  | 86.09643  | 1410.72889     | 705.86808       | 470.91448       | I                 | 1648.84921     | 824.92825       | 550.28792       | 13 |
| 10 | 88.03930  | 1525.75583     | 763.38155       | 509.25680       | D                 | 1535.76515     | 768.38621       | 512.59323       | 12 |
| 11 | 30.03383  | 1582.77730     | 791.89229       | 528.26395       | G                 | 1420.73821     | 710.87274       | 474.25092       | 11 |
| 12 | 60.04439  | 1669.80932     | 835.40830       | 557.27463       | S                 | 1363.71674     | 682.36201       | 455.24377       | 10 |
| 13 | 30.03383  | 1726.83079     | 863.91903       | 576.28178       | G                 | 1276.68472     | 638.84600       | 426.23309       | 9  |
| 14 | 87.05529  | 1840.87372     | 920.94050       | 614.29609       | N                 | 1219.66325     | 610.33526       | 407.22594       | 8  |
| 15 | 30.03383  | 1897.89518     | 949.45123       | 633.30324       | G                 | 1105.62032     | 553.31380       | 369.21163       | 7  |
| 16 | 204.07675 | 2128.95957     | 1064.98342      | 710.32471       | W-Nitro           | 1048.59886     | 524.80307       | 350.20447       | 6  |
| 17 | 74.06004  | 2230.00725     | 1115.50726      | 744.00727       | T                 | 817.53447      | 409.27087       | 273.18301       | 5  |
| 18 | 72.08078  | 2329.07566     | 1165.04147      | 777.03007       | V                 | 716.48679      | 358.74703       | 239.50045       | 4  |
| 19 | 86.09643  | 2442.15973     | 1221.58350      | 814.72476       | L                 | 617.41838      | 309.21283       | 206.47764       | 3  |
| 20 | 101.07094 | 2570.21830     | 1285.61279      | 857.41095       | Q                 | 504.33431      | 252.67080       | 168.78296       | 2  |
| 21 | 330.27026 |                |                 |                 | K-TMT6plex        | 376.27574      | 188.64151       | 126.09676       | 1  |

JM\_NDplasmaBVM\_TMT\_NoFrac.raw #125751 RT: 338.5466 min  
FTMS, 983.1763@hcd35.00, z=+3, Mono m/z=982.53516 Da, MH+=2945.59092 Da, Match Tol.=0.02 Da

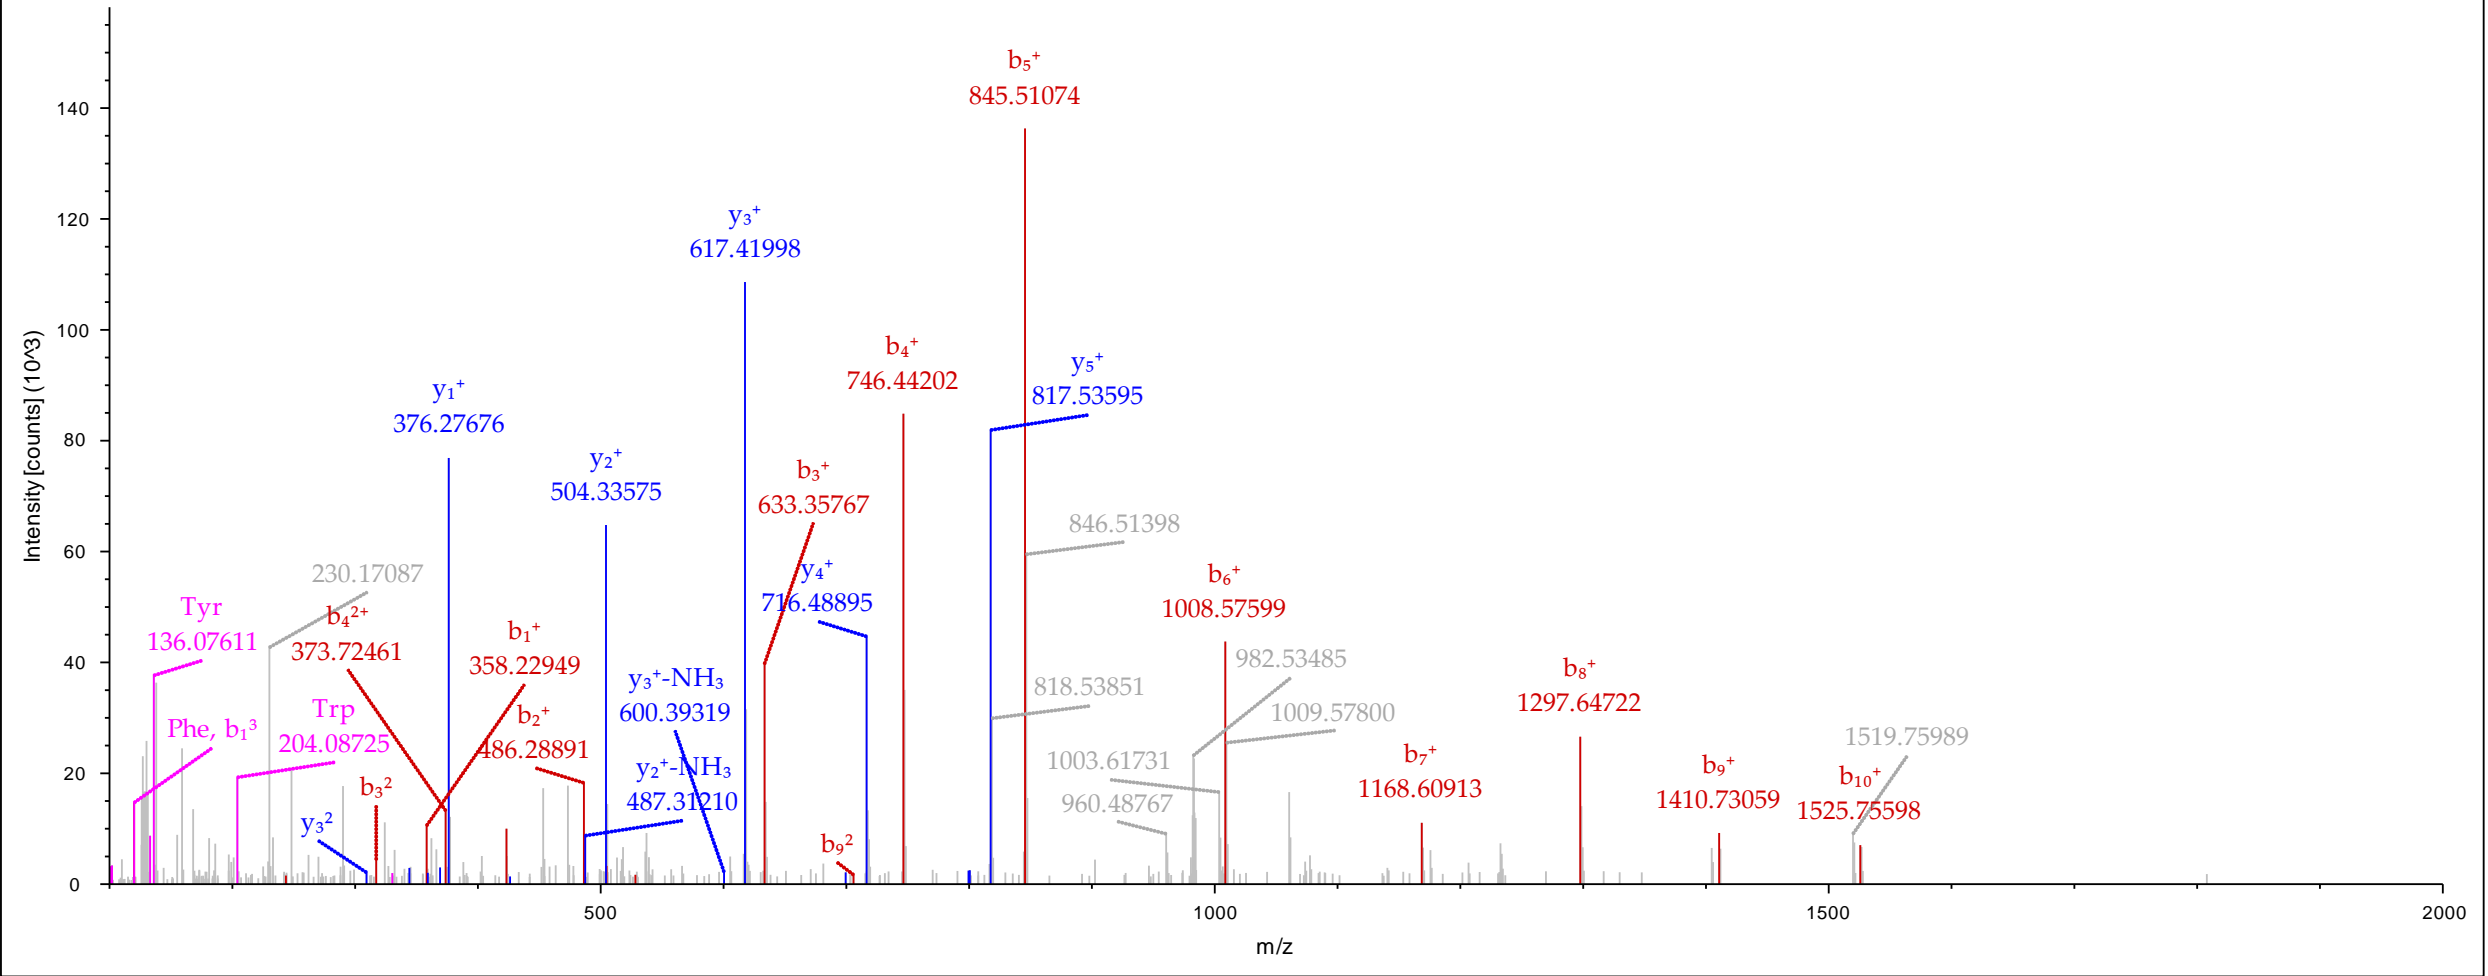

— Pre+H, Precursor, Precursor- $H_2O$ , Precursor- $H_2O-NH_3$ , Precursor- $NH_3$ , Pre-H — Immonium  
—  $y$ ,  $y-H_2O$ ,  $y-NH_3$  —  $b$ ,  $b-H_2O$ ,  $b-NH_3$

| #1 | Immonium  | b <sup>+</sup> | b <sup>2+</sup> | b <sup>3+</sup> | b <sup>4+</sup> | b <sup>5+</sup> | Seq.       | y <sup>+</sup> | y <sup>2+</sup> | y <sup>3+</sup> | y <sup>4+</sup> | y <sup>5+</sup> | #2 |
|----|-----------|----------------|-----------------|-----------------|-----------------|-----------------|------------|----------------|-----------------|-----------------|-----------------|-----------------|----|
| 1  | 317.20224 | 345.19715      | 173.10221       | 115.73723       | 87.05475        | 69.84525        | D-TMT6plex |                |                 |                 |                 |                 | 31 |
| 2  | 86.09643  | 458.28122      | 229.64425       | 153.43192       | 115.32576       | 92.46206        | I          | 3941.04854     | 1971.02791      | 1314.35436      | 986.01759       | 789.01553       | 30 |
| 3  | 70.06513  | 555.33398      | 278.17063       | 185.78284       | 139.58895       | 111.87262       | P          | 3827.96447     | 1914.48588      | 1276.65968      | 957.74658       | 766.39872       | 29 |
| 4  | 72.08078  | 654.40239      | 327.70483       | 218.80565       | 164.35606       | 131.68630       | V          | 3730.91171     | 1865.95949      | 1244.30875      | 933.48338       | 746.98816       | 28 |
| 5  | 88.03930  | 769.42934      | 385.21831       | 257.14796       | 193.11279       | 154.69169       | D          | 3631.84330     | 1816.42529      | 1211.28595      | 908.71628       | 727.17448       | 27 |
| 6  | 60.04439  | 856.46136      | 428.73432       | 286.15864       | 214.87080       | 172.09809       | S          | 3516.81635     | 1758.91181      | 1172.94364      | 879.95955       | 704.16909       | 26 |
| 7  | 70.06513  | 953.51413      | 477.26070       | 318.50956       | 239.13399       | 191.50865       | P          | 3429.78432     | 1715.39580      | 1143.93296      | 858.20154       | 686.76269       | 25 |
| 8  | 102.05496 | 1082.55672     | 541.78200       | 361.52376       | 271.39464       | 217.31717       | E          | 3332.73156     | 1666.86942      | 1111.58204      | 833.93835       | 667.35213       | 24 |
| 9  | 86.09643  | 1195.64079     | 598.32403       | 399.21845       | 299.66565       | 239.93398       | L          | 3203.68897     | 1602.34812      | 1068.56784      | 801.67770       | 641.54361       | 23 |
| 10 | 330.27026 | 1552.89868     | 776.95298       | 518.30441       | 388.98013       | 311.38556       | K-TMT6plex | 3090.60490     | 1545.80609      | 1030.87315      | 773.40668       | 618.92680       | 22 |
| 11 | 102.05496 | 1681.94127     | 841.47427       | 561.31861       | 421.24078       | 337.19408       | E          | 2733.34701     | 1367.17714      | 911.78719       | 684.09221       | 547.47522       | 21 |
| 12 | 72.08078  | 1781.00969     | 891.00848       | 594.34141       | 446.00788       | 357.00776       | V          | 2604.30442     | 1302.65585      | 868.77299       | 651.83156       | 521.66670       | 20 |
| 13 | 86.09643  | 1894.09375     | 947.55051       | 632.03610       | 474.27890       | 379.62457       | I          | 2505.23600     | 1253.12164      | 835.75019       | 627.06446       | 501.85302       | 19 |
| 14 | 30.03383  | 1951.11521     | 976.06125       | 651.04326       | 488.53426       | 391.02886       | G          | 2392.15194     | 1196.57961      | 798.05550       | 598.79344       | 479.23621       | 18 |
| 15 | 110.07127 | 2088.17413     | 1044.59070      | 696.72956       | 522.79899       | 418.44065       | H          | 2335.13047     | 1168.06888      | 779.04834       | 584.53808       | 467.83192       | 17 |
| 16 | 60.04439  | 2175.20615     | 1088.10672      | 725.74024       | 544.55700       | 435.84705       | S          | 2198.07156     | 1099.53942      | 733.36204       | 550.27335       | 440.42013       | 16 |
| 17 | 86.09643  | 2288.29022     | 1144.64875      | 763.43492       | 572.82801       | 458.46387       | I          | 2111.03953     | 1056.02341      | 704.35136       | 528.51534       | 423.01373       | 15 |
| 18 | 44.04948  | 2359.32733     | 1180.16730      | 787.11396       | 590.58729       | 472.67129       | A          | 1997.95547     | 999.48137       | 666.65667       | 500.24433       | 400.39692       | 14 |
| 19 | 101.07094 | 2487.38591     | 1244.19659      | 829.80015       | 622.60193       | 498.28300       | Q          | 1926.91836     | 963.96282       | 642.97764       | 482.48505       | 386.18949       | 13 |
| 20 | 86.09643  | 2600.46997     | 1300.73863      | 867.49484       | 650.87295       | 520.89982       | L          | 1798.85978     | 899.93353       | 600.29144       | 450.47040       | 360.57778       | 12 |
| 21 | 87.05529  | 2714.51290     | 1357.76009      | 905.50915       | 679.38368       | 543.70840       | N          | 1685.77572     | 843.39150       | 562.59676       | 422.19939       | 337.96096       | 11 |
| 22 | 74.06004  | 2815.56058     | 1408.28393      | 939.19171       | 704.64560       | 563.91794       | T          | 1571.73279     | 786.37003       | 524.58245       | 393.68865       | 315.15238       | 10 |
| 23 | 102.05496 | 2944.60317     | 1472.80522      | 982.20591       | 736.90625       | 589.72646       | E          | 1470.68511     | 735.84619       | 490.89989       | 368.42673       | 294.94284       | 9  |
| 24 | 87.05529  | 3058.64610     | 1529.82669      | 1020.22022      | 765.41698       | 612.53504       | N          | 1341.64252     | 671.32490       | 447.88569       | 336.16609       | 269.13432       | 8  |
| 25 | 88.03930  | 3173.67304     | 1587.34016      | 1058.56253      | 794.17372       | 635.54043       | D          | 1227.59959     | 614.30343       | 409.87138       | 307.65535       | 246.32574       | 7  |
| 26 | 110.07127 | 3310.73195     | 1655.86962      | 1104.24884      | 828.43845       | 662.95221       | H          | 1112.57265     | 556.78996       | 371.52907       | 278.89862       | 223.32035       | 6  |
| 27 | 70.06513  | 3407.78472     | 1704.39600      | 1136.59976      | 852.70164       | 682.36277       | P          | 975.51373      | 488.26051       | 325.84276       | 244.63389       | 195.90857       | 5  |
| 28 | 120.08078 | 3554.85313     | 1777.93020      | 1185.62256      | 889.46874       | 711.77645       | F          | 878.46097      | 439.73412       | 293.49184       | 220.37070       | 176.49802       | 4  |
| 29 | 181.06077 | 3762.90154     | 1881.95441      | 1254.97203      | 941.48084       | 753.38613       | Y-Nitro    | 731.39256      | 366.19992       | 244.46904       | 183.60360       | 147.08433       | 3  |
| 30 | 120.08078 | 3909.96995     | 1955.48861      | 1303.99484      | 978.24795       | 782.79981       | F          | 523.34415      | 262.17571       | 175.11957       | 131.59150       | 105.47465       | 2  |
| 31 | 330.27026 |                |                 |                 |                 |                 | K-TMT6plex | 376.27574      | 188.64151       | 126.09676       | 94.82439        | 76.06097        | 1  |

JMR\_Mouse\_Marfan\_TMT\_Fr3\_191002102636.raw #64866 RT: 222.0687 min  
 FTMS, 858.0629@hcd30.00, z=+5, Mono m/z=857.46008 Da, MH+=4283.27131 Da, Match Tol.=0.02 Da

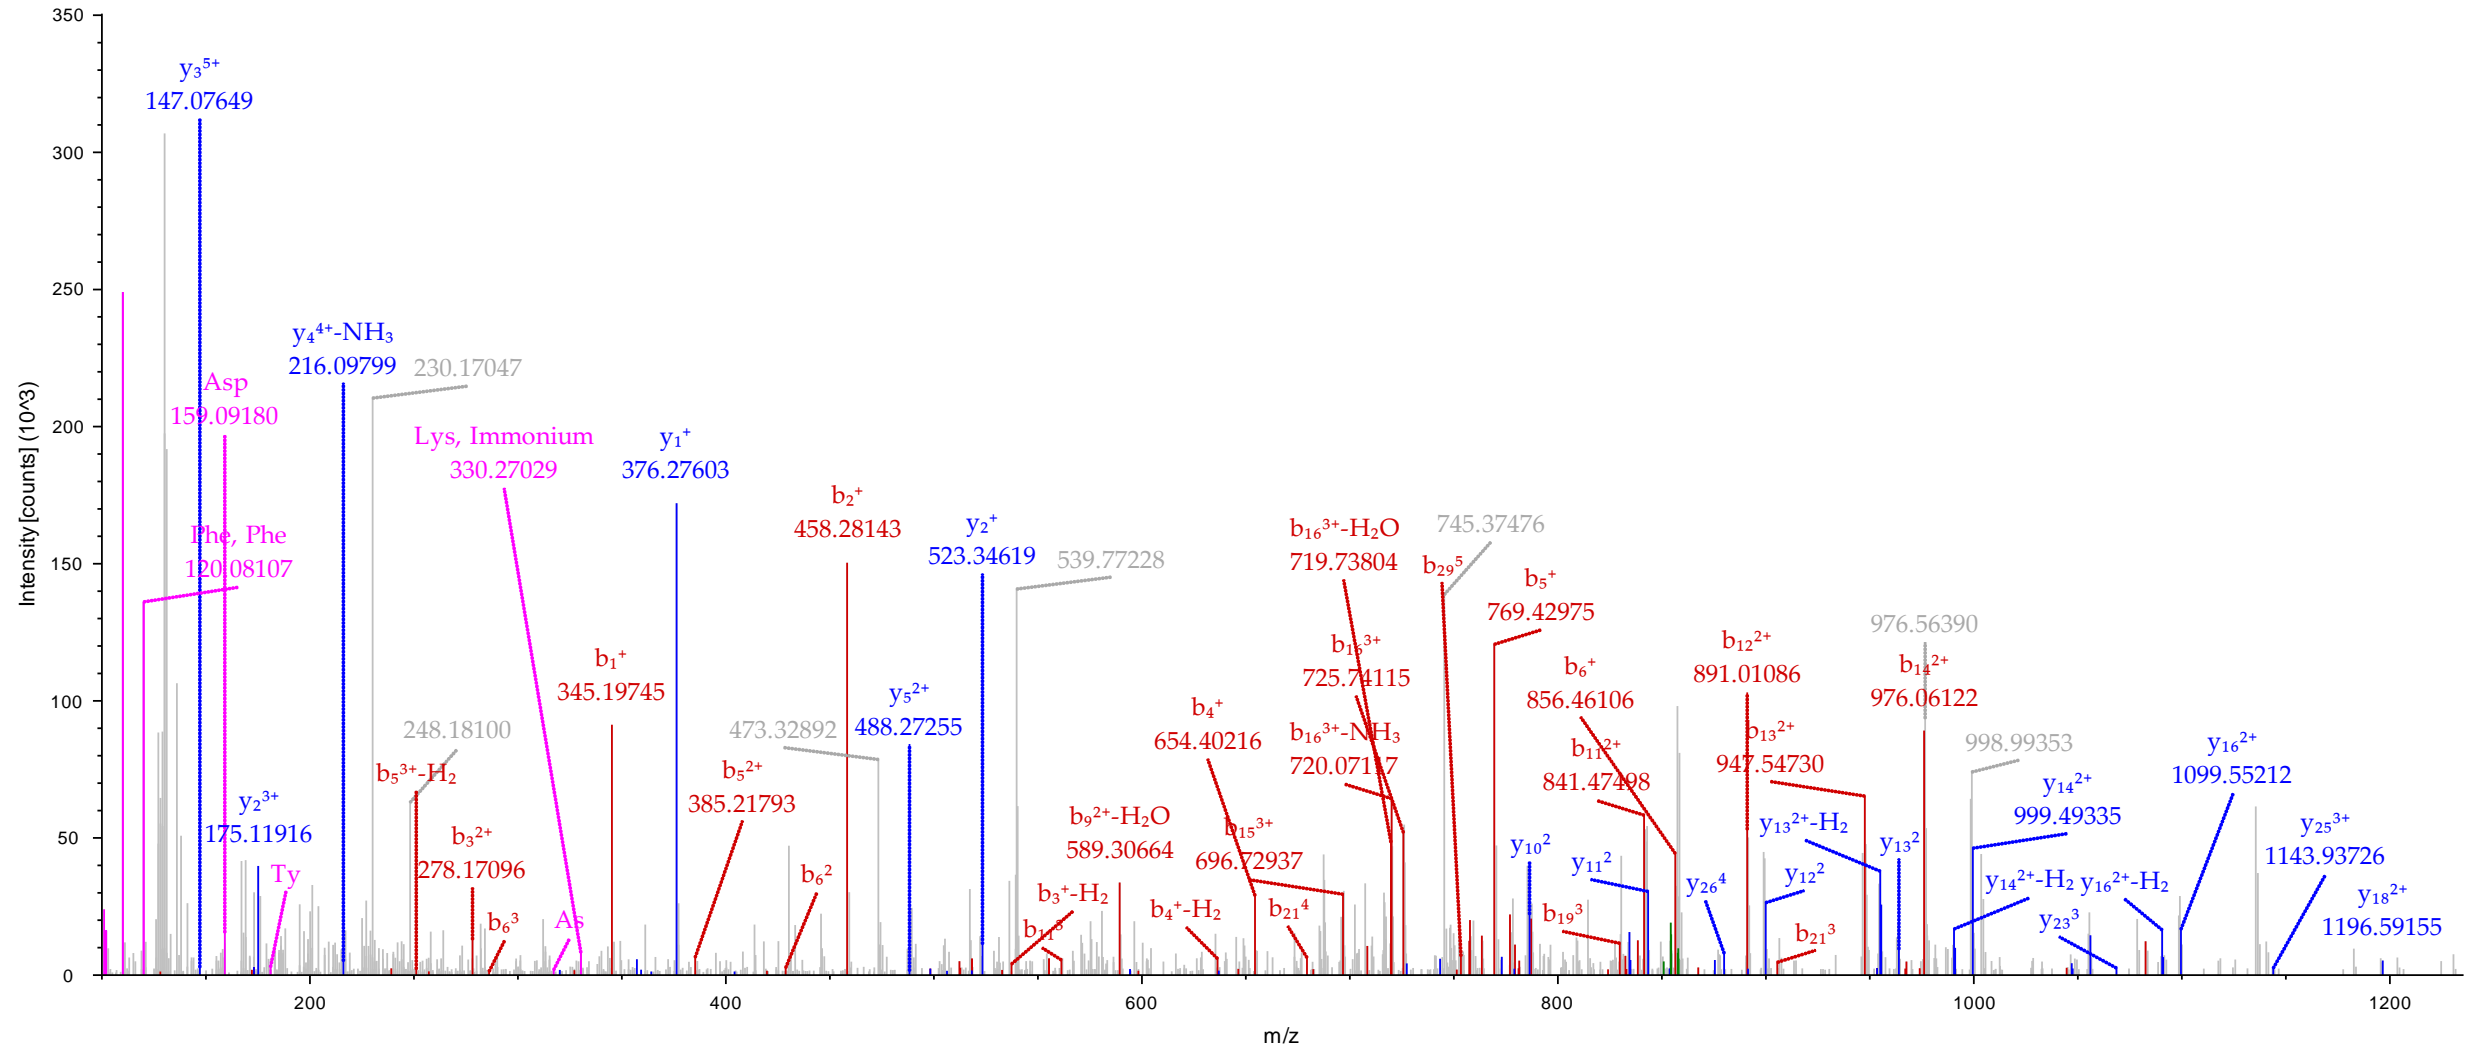

Pre-H, Precursor, Precursor-H<sub>2</sub>O, Precursor-H<sub>2</sub>O-NH<sub>3</sub>, Precursor-NH<sub>3</sub>, Pre-H Immonium

y, y-H<sub>2</sub>O, y-NH<sub>3</sub> b, b-H<sub>2</sub>O, b-NH<sub>3</sub>

| #1 | Immonium  | b <sup>+</sup> | b <sup>2+</sup> | b <sup>3+</sup> | b <sup>4+</sup> | Seq.       | y <sup>+</sup> | y <sup>2+</sup> | y <sup>3+</sup> | y <sup>4+</sup> | #2 |
|----|-----------|----------------|-----------------|-----------------|-----------------|------------|----------------|-----------------|-----------------|-----------------|----|
| 1  | 331.21789 | 359.21280      | 180.11004       | 120.40912       | 90.55866        | E-TMT6plex |                |                 |                 |                 | 21 |
| 2  | 72.08078  | 458.28122      | 229.64425       | 153.43192       | 115.32576       | V          | 2604.30442     | 1302.65585      | 868.77299       | 651.83156       | 20 |
| 3  | 86.09643  | 571.36528      | 286.18628       | 191.12661       | 143.59678       | L          | 2505.23600     | 1253.12164      | 835.75019       | 627.06446       | 19 |
| 4  | 30.03383  | 628.38674      | 314.69701       | 210.13377       | 157.85214       | G          | 2392.15194     | 1196.57961      | 798.05550       | 598.79344       | 18 |
| 5  | 110.07127 | 765.44565      | 383.22647       | 255.82007       | 192.11687       | H          | 2335.13047     | 1168.06888      | 779.04834       | 584.53808       | 17 |
| 6  | 60.04439  | 852.47768      | 426.74248       | 284.83075       | 213.87488       | S          | 2198.07156     | 1099.53942      | 733.36204       | 550.27335       | 16 |
| 7  | 86.09643  | 965.56175      | 483.28451       | 322.52543       | 242.14589       | I          | 2111.03953     | 1056.02341      | 704.35136       | 528.51534       | 15 |
| 8  | 44.04948  | 1036.59886     | 518.80307       | 346.20447       | 259.90517       | A          | 1997.95547     | 999.48137       | 666.65667       | 500.24433       | 14 |
| 9  | 101.07094 | 1164.65744     | 582.83236       | 388.89066       | 291.91982       | Q          | 1926.91836     | 963.96282       | 642.97764       | 482.48505       | 13 |
| 10 | 86.09643  | 1277.74150     | 639.37439       | 426.58535       | 320.19083       | L          | 1798.85978     | 899.93353       | 600.29144       | 450.47040       | 12 |
| 11 | 87.05529  | 1391.78443     | 696.39585       | 464.59966       | 348.70156       | N          | 1685.77572     | 843.39150       | 562.59676       | 422.19939       | 11 |
| 12 | 74.06004  | 1492.83211     | 746.91969       | 498.28222       | 373.96348       | T          | 1571.73279     | 786.37003       | 524.58245       | 393.68865       | 10 |
| 13 | 102.05496 | 1621.87470     | 811.44099       | 541.29642       | 406.22413       | E          | 1470.68511     | 735.84619       | 490.89989       | 368.42673       | 9  |
| 14 | 87.05529  | 1735.91763     | 868.46245       | 579.31073       | 434.73486       | N          | 1341.64252     | 671.32490       | 447.88569       | 336.16609       | 8  |
| 15 | 88.03930  | 1850.94457     | 925.97592       | 617.65304       | 463.49160       | D          | 1227.59959     | 614.30343       | 409.87138       | 307.65535       | 7  |
| 16 | 110.07127 | 1988.00348     | 994.50538       | 663.33935       | 497.75633       | H          | 1112.57265     | 556.78996       | 371.52907       | 278.89862       | 6  |
| 17 | 70.06513  | 2085.05625     | 1043.03176      | 695.69027       | 522.01952       | P          | 975.51373      | 488.26051       | 325.84276       | 244.63389       | 5  |
| 18 | 120.08078 | 2232.12466     | 1116.56597      | 744.71307       | 558.78662       | F          | 878.46097      | 439.73412       | 293.49184       | 220.37070       | 4  |
| 19 | 181.06077 | 2440.17307     | 1220.59017      | 814.06254       | 610.79872       | Y-Nitro    | 731.39256      | 366.19992       | 244.46904       | 183.60360       | 3  |
| 20 | 120.08078 | 2587.24148     | 1294.12438      | 863.08534       | 647.56583       | F          | 523.34415      | 262.17571       | 175.11957       | 131.59150       | 2  |
| 21 | 330.27026 |                |                 |                 |                 | K-TMT6plex | 376.27574      | 188.64151       | 126.09676       | 94.82439        | 1  |

JMR\_Mouse\_Marfan\_TMT\_Fr4\_191003104527.raw #28073 RT: 106.3681 min  
 FTMS, 741.3913@hcd30.00, z=+4, Mono m/z=740.89026 Da, MH+=2960.53921 Da, Match Tol.=0.02 Da

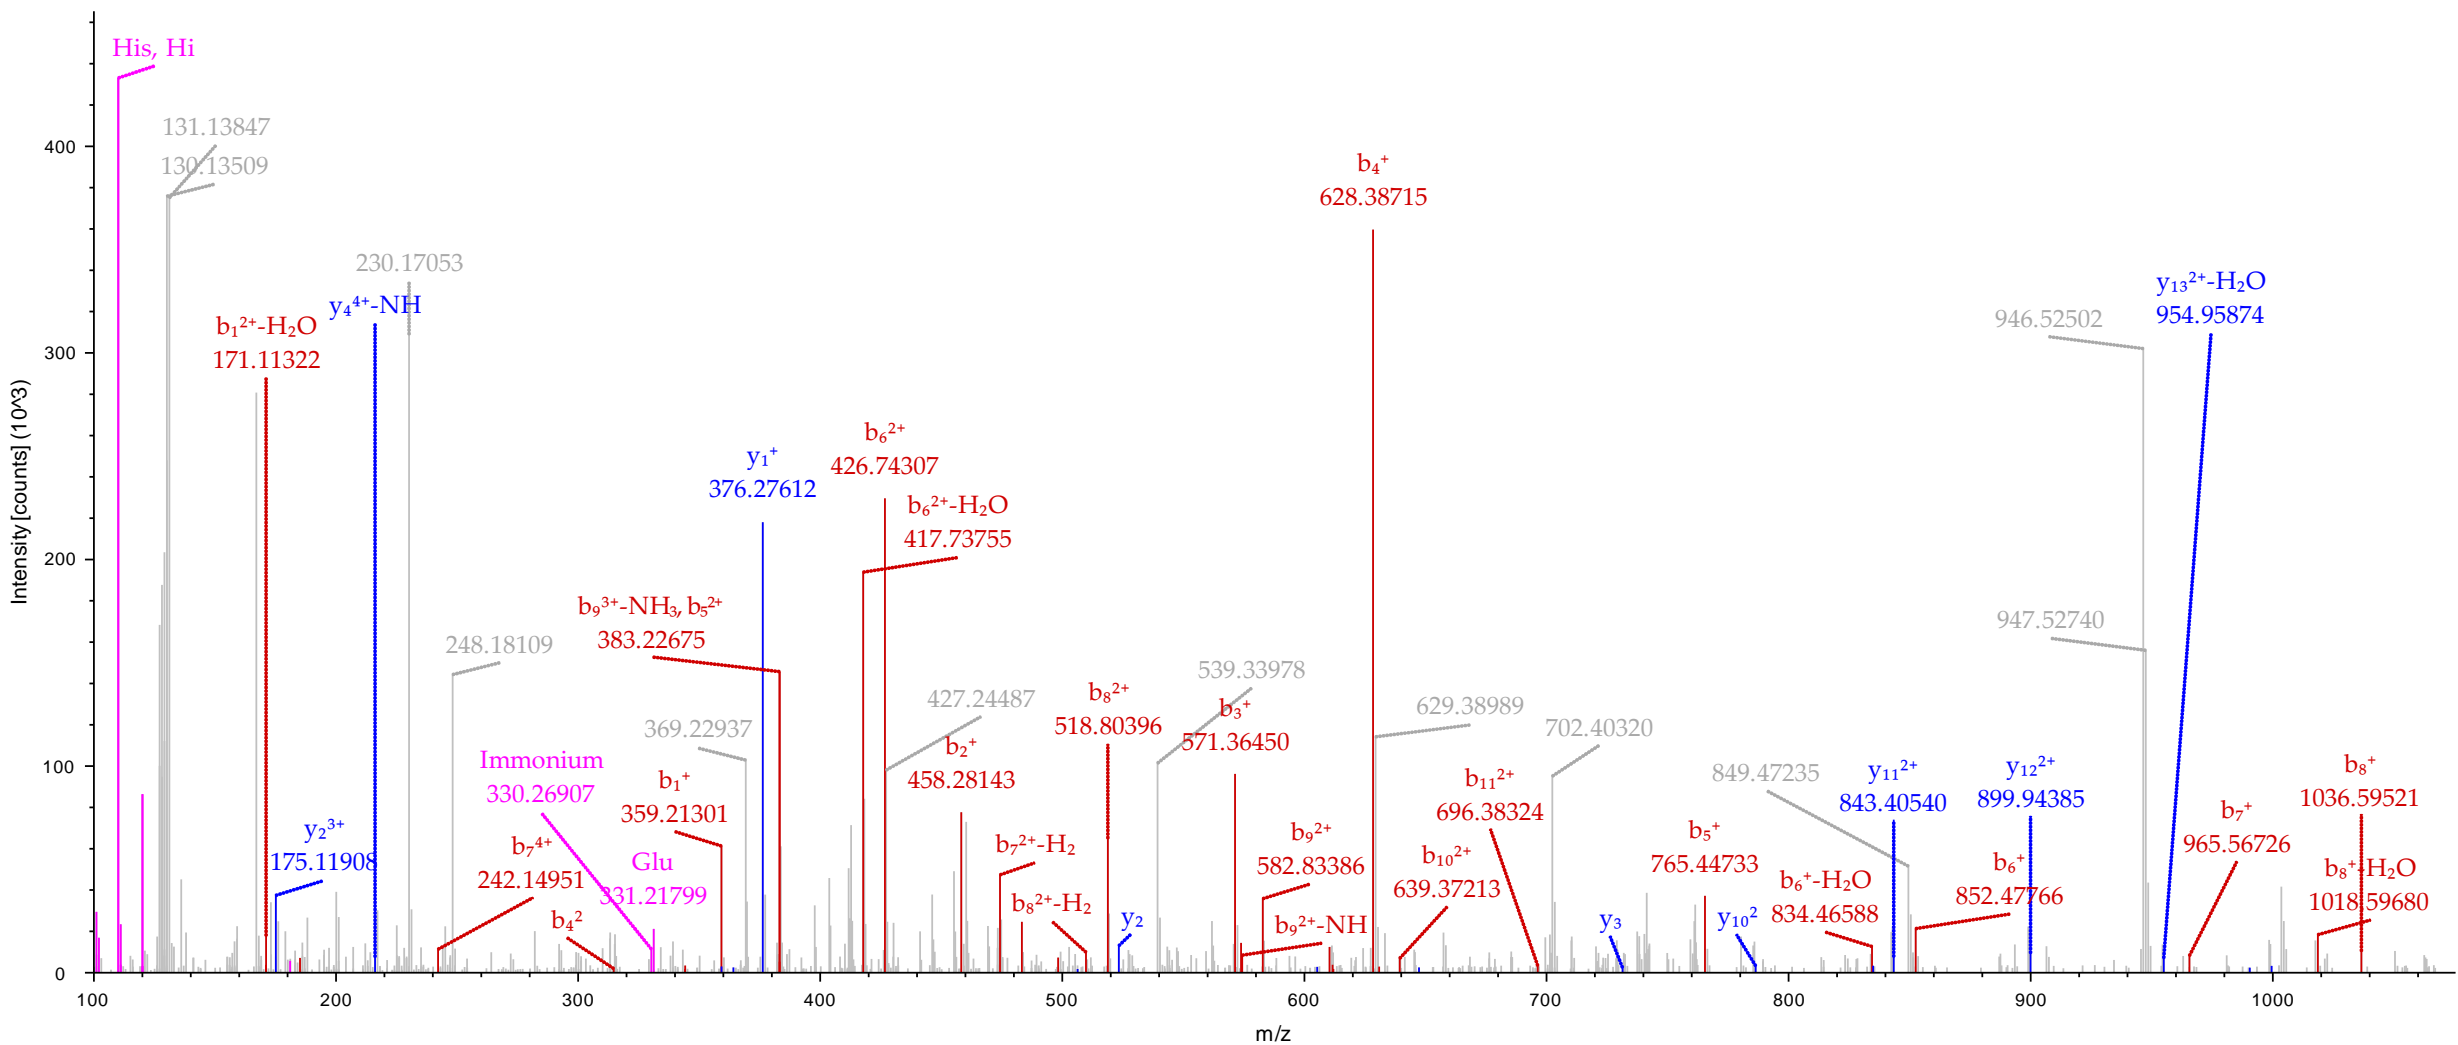

— Pre+H, Precursor, Precursor-H<sub>2</sub>O, Precursor-H<sub>2</sub>O-NH<sub>3</sub>, Precursor-NH<sub>3</sub>, Pre-H     — Immonium  
— y, y-H<sub>2</sub>O, y-NH<sub>3</sub>     — b, b-H<sub>2</sub>O, b-NH<sub>3</sub>
