# Supplementary material for: Aortic disease in Marfan syndrome is caused by overactivation of sGC-PRKG signaling by NO
Source: PubMed Central journal article supplement (PMC8113458; doi:10.1038/s41467-021-22933-3), 2021-05-11
Supplement: 41467_2021_22933_MOESM7_ESM.pdf [file 41467_2021_22933_MOESM7_ESM.pdf]

| #1 | Immonium  | b <sup>+</sup> | b <sup>2+</sup> | b <sup>3+</sup> | Seq.       | y <sup>+</sup> | y <sup>2+</sup> | y <sup>3+</sup> | #2 |
|----|-----------|----------------|-----------------|-----------------|------------|----------------|-----------------|-----------------|----|
| 1  | 315.25936 | 343.25427      | 172.13077       | 115.08961       | L-TMT6plex |                |                 |                 | 18 |
| 2  | 86.09643  | 456.33834      | 228.67281       | 152.78430       | L          | 2206.16269     | 1103.58498      | 736.05908       | 17 |
| 3  | 86.09643  | 569.42240      | 285.21484       | 190.47898       | L          | 2093.07862     | 1047.04295      | 698.36439       | 16 |
| 4  | 101.07094 | 697.48098      | 349.24413       | 233.16518       | Q          | 1979.99456     | 990.50092       | 660.66970       | 15 |
| 5  | 101.07094 | 825.53956      | 413.27342       | 275.85137       | Q          | 1851.93598     | 926.47163       | 617.98351       | 14 |
| 6  | 72.08078  | 924.60797      | 462.80762       | 308.87417       | V          | 1723.87740     | 862.44234       | 575.29732       | 13 |
| 7  | 60.04439  | 1011.64000     | 506.32364       | 337.88485       | S          | 1624.80899     | 812.90813       | 542.27451       | 12 |
| 8  | 86.09643  | 1124.72406     | 562.86567       | 375.57954       | L          | 1537.77696     | 769.39212       | 513.26384       | 11 |
| 9  | 70.06513  | 1221.77683     | 611.39205       | 407.93046       | P          | 1424.69290     | 712.85009       | 475.56915       | 10 |
| 10 | 102.05496 | 1350.81942     | 675.91335       | 450.94466       | E          | 1327.64013     | 664.32370       | 443.21823       | 9  |
| 11 | 86.09643  | 1463.90348     | 732.45538       | 488.63935       | L          | 1198.59754     | 599.80241       | 400.20403       | 8  |
| 12 | 70.06513  | 1560.95625     | 780.98176       | 520.99027       | P          | 1085.51348     | 543.26038       | 362.50934       | 7  |
| 13 | 30.03383  | 1617.97771     | 809.49249       | 539.99742       | G          | 988.46071      | 494.73399       | 330.15842       | 6  |
| 14 | 102.05496 | 1747.02030     | 874.01379       | 583.01162       | E          | 931.43925      | 466.22326       | 311.15127       | 5  |
| 15 | 181.06077 | 1955.06871     | 978.03799       | 652.36109       | Y-Nitro    | 802.39666      | 401.70197       | 268.13707       | 4  |
| 16 | 60.04439  | 2042.10074     | 1021.55401      | 681.37176       | S          | 594.34825      | 297.67776       | 198.78760       | 3  |
| 17 | 104.05285 | 2173.14122     | 1087.07425      | 725.05193       | M          | 507.31622      | 254.16175       | 169.77692       | 2  |
| 18 | 330.27026 |                |                 |                 | K-TMT6plex | 376.27574      | 188.64151       | 126.09676       | 1  |

JM\_HuMarfanPlasma\_TMT6.raw #111532 RT: 311.0461 min  
 FTMS, 850.4692@hcd30.00, z=+3, Mono m/z=850.46918 Da, MH+=2549.39298 Da, Match Tol.=0.02 Da

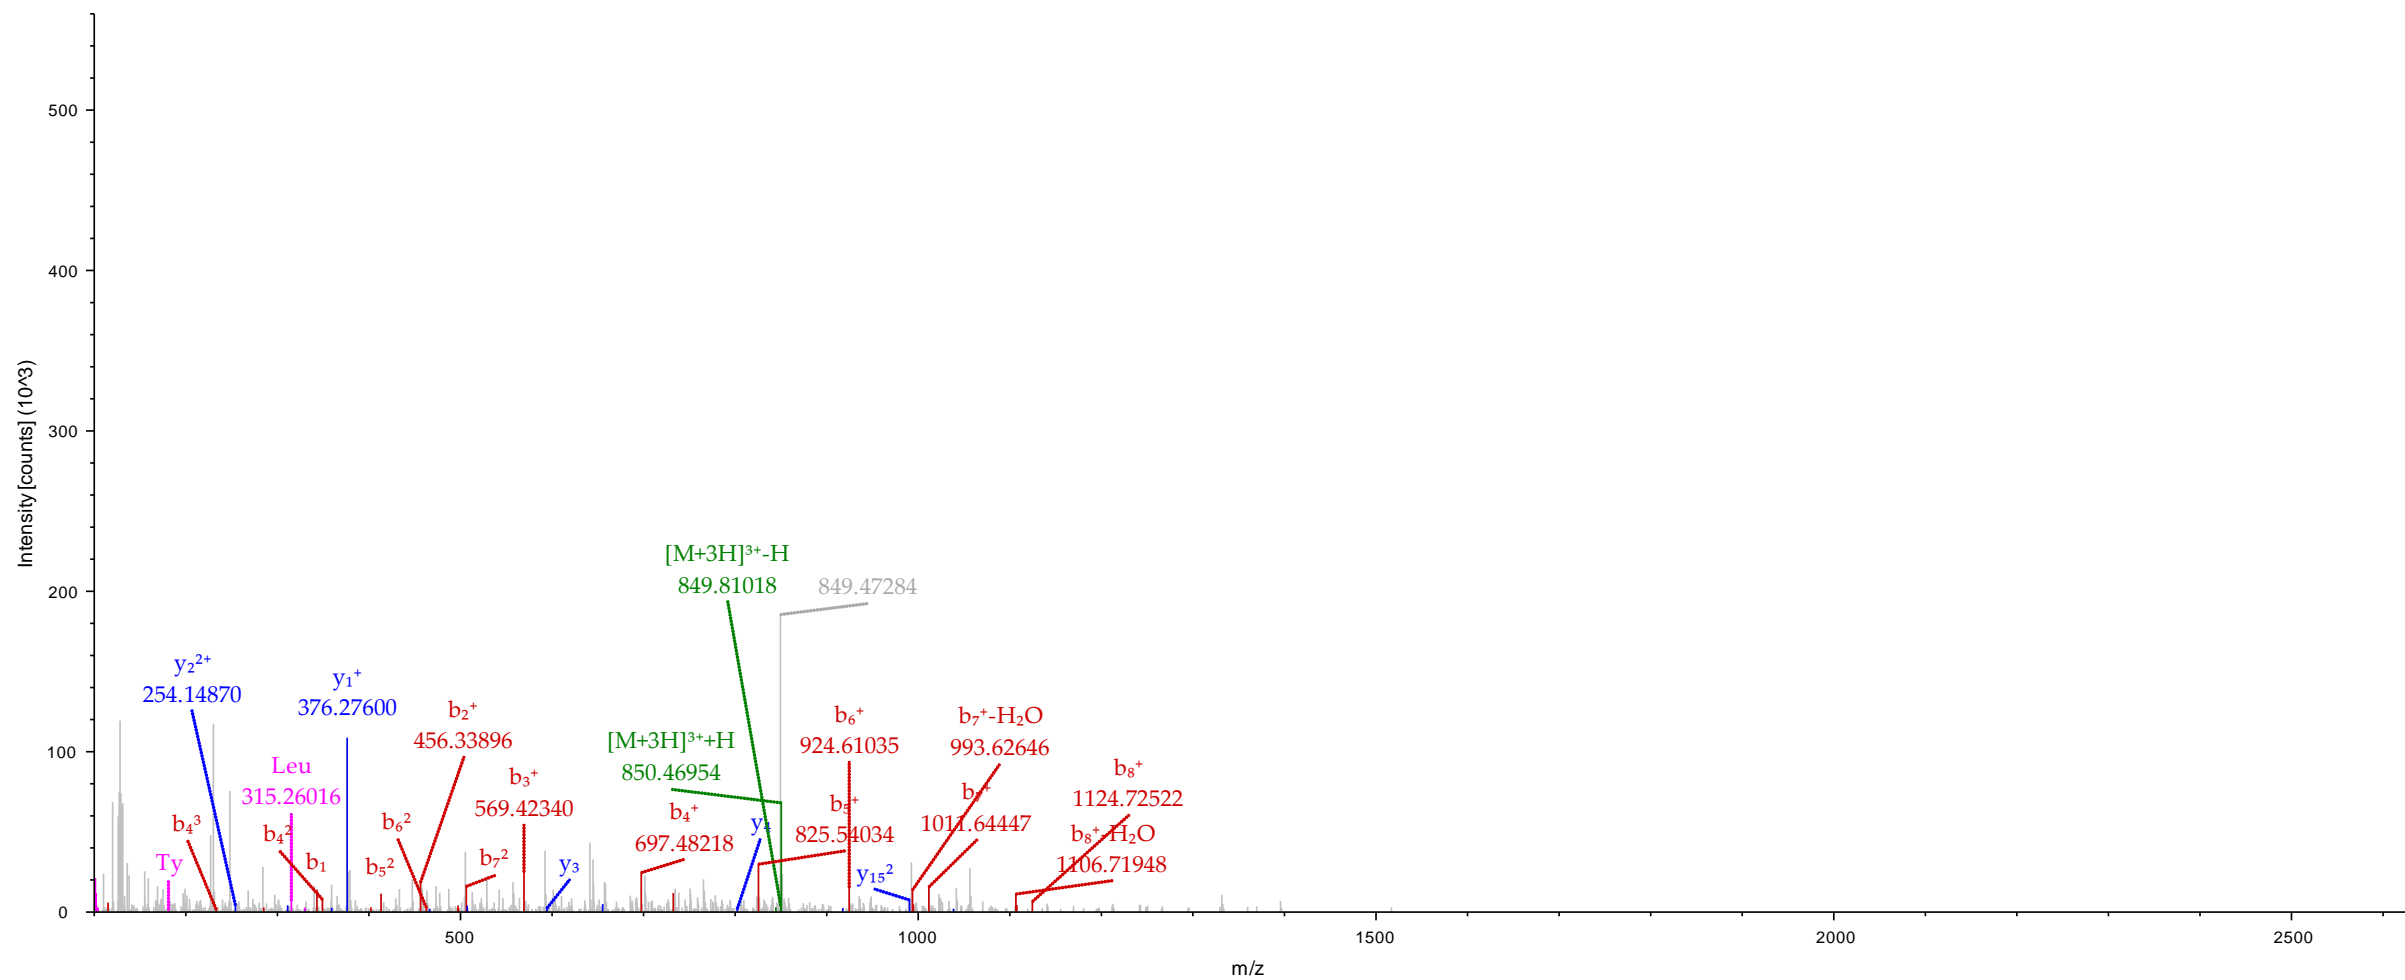

— Pre+H, Precursor, Precursor-H<sub>2</sub>O, Precursor-H<sub>2</sub>O-NH<sub>3</sub>, Precursor-NH<sub>3</sub>, Pre-H  
— y, y-H<sub>2</sub>O, y-NH<sub>3</sub>  
— Immonium  
— b, b-H<sub>2</sub>O, b-NH<sub>3</sub>

| #1 | Immonium  | b <sup>+</sup> | b <sup>2+</sup> | b <sup>3+</sup> | b <sup>4+</sup> | Seq.       | y <sup>+</sup> | y <sup>2+</sup> | y <sup>3+</sup> | y <sup>4+</sup> | #2 |
|----|-----------|----------------|-----------------|-----------------|-----------------|------------|----------------|-----------------|-----------------|-----------------|----|
| 1  | 273.21241 | 301.20732      | 151.10730       | 101.07396       | 76.05729        | A-TMT6plex |                |                 |                 |                 | 27 |
| 2  | 72.08078  | 400.27574      | 200.64151       | 134.09676       | 100.82439       | V          | 3349.79653     | 1675.40190      | 1117.27036      | 838.20459       | 26 |
| 3  | 88.03930  | 515.30268      | 258.15498       | 172.43908       | 129.58113       | D          | 3250.72811     | 1625.86770      | 1084.24756      | 813.43749       | 25 |
| 4  | 101.07094 | 643.36126      | 322.18427       | 215.12527       | 161.59577       | Q          | 3135.70117     | 1568.35422      | 1045.90524      | 784.68075       | 24 |
| 5  | 60.04439  | 730.39328      | 365.70028       | 244.13595       | 183.35378       | S          | 3007.64259     | 1504.32494      | 1003.21905      | 752.66611       | 23 |
| 6  | 72.08078  | 829.46170      | 415.23449       | 277.15875       | 208.12088       | V          | 2920.61057     | 1460.80892      | 974.20837       | 730.90810       | 22 |
| 7  | 86.09643  | 942.54576      | 471.77652       | 314.85344       | 236.39190       | L          | 2821.54215     | 1411.27471      | 941.18557       | 706.14100       | 21 |
| 8  | 86.09643  | 1055.62983     | 528.31855       | 352.54813       | 264.66291       | L          | 2708.45809     | 1354.73268      | 903.49088       | 677.86998       | 20 |
| 9  | 104.05285 | 1186.67031     | 593.83879       | 396.22829       | 297.42304       | M          | 2595.37402     | 1298.19065      | 865.79619       | 649.59896       | 19 |
| 10 | 330.27026 | 1543.92821     | 772.46774       | 515.31425       | 386.73751       | K-TMT6plex | 2464.33354     | 1232.67041      | 822.11603       | 616.83884       | 18 |
| 11 | 70.06513  | 1640.98097     | 820.99412       | 547.66517       | 411.00070       | P          | 2107.07564     | 1054.04146      | 703.03007       | 527.52437       | 17 |
| 12 | 88.03930  | 1756.00791     | 878.50759       | 586.00749       | 439.75744       | D          | 2010.02288     | 1005.51508      | 670.67914       | 503.26118       | 16 |
| 13 | 44.04948  | 1827.04503     | 914.02615       | 609.68653       | 457.51671       | A          | 1894.99594     | 948.00161       | 632.33683       | 474.50444       | 15 |
| 14 | 102.05496 | 1956.08762     | 978.54745       | 652.70072       | 489.77736       | E          | 1823.95882     | 912.48305       | 608.65779       | 456.74516       | 14 |
| 15 | 86.09643  | 2069.17168     | 1035.08948      | 690.39541       | 518.04838       | L          | 1694.91623     | 847.96175       | 565.64359       | 424.48452       | 13 |
| 16 | 60.04439  | 2156.20371     | 1078.60549      | 719.40609       | 539.80639       | S          | 1581.83217     | 791.41972       | 527.94891       | 396.21350       | 12 |
| 17 | 44.04948  | 2227.24083     | 1114.12405      | 743.08513       | 557.56566       | A          | 1494.80014     | 747.90371       | 498.93823       | 374.45549       | 11 |
| 18 | 60.04439  | 2314.27285     | 1157.64007      | 772.09580       | 579.32367       | S          | 1423.76303     | 712.38515       | 475.25919       | 356.69621       | 10 |
| 19 | 60.04439  | 2401.30488     | 1201.15608      | 801.10648       | 601.08168       | S          | 1336.73100     | 668.86914       | 446.24852       | 334.93821       | 9  |
| 20 | 72.08078  | 2500.37330     | 1250.69029      | 834.12928       | 625.84878       | V          | 1249.69897     | 625.35312       | 417.23784       | 313.18020       | 8  |
| 21 | 181.06077 | 2708.42170     | 1354.71449      | 903.47875       | 677.86088       | Y-Nitro    | 1150.63055     | 575.81892       | 384.21504       | 288.41310       | 7  |
| 22 | 87.05529  | 2822.46463     | 1411.73595      | 941.49306       | 706.37162       | N          | 942.58215      | 471.79471       | 314.86557       | 236.40099       | 6  |
| 23 | 86.09643  | 2935.54869     | 1468.27799      | 979.18775       | 734.64263       | L          | 828.53922      | 414.77325       | 276.85126       | 207.89026       | 5  |
| 24 | 86.09643  | 3048.63276     | 1524.82002      | 1016.88244      | 762.91365       | L          | 715.45516      | 358.23122       | 239.15657       | 179.61925       | 4  |
| 25 | 70.06513  | 3145.68552     | 1573.34640      | 1049.23336      | 787.17684       | P          | 602.37109      | 301.68918       | 201.46188       | 151.34823       | 3  |
| 26 | 102.05496 | 3274.72811     | 1637.86770      | 1092.24756      | 819.43749       | E          | 505.31833      | 253.16280       | 169.11096       | 127.08504       | 2  |
| 27 | 330.27026 |                |                 |                 |                 | K-TMT6plex | 376.27574      | 188.64151       | 126.09676       | 94.82439        | 1  |

Nitro-Tyr immonium ion is detected in MS/MS spectra and added brown colored in the following spectrum

JM\_HuMarfanPlasma\_TMT2.raw #116855 RT: 321.9222 min  
 FTMS, 913.7676@hcd30.00, z=+4, Mono m/z=913.26624 Da, MH+=3650.04311 Da, Match Tol.=0.02 Da

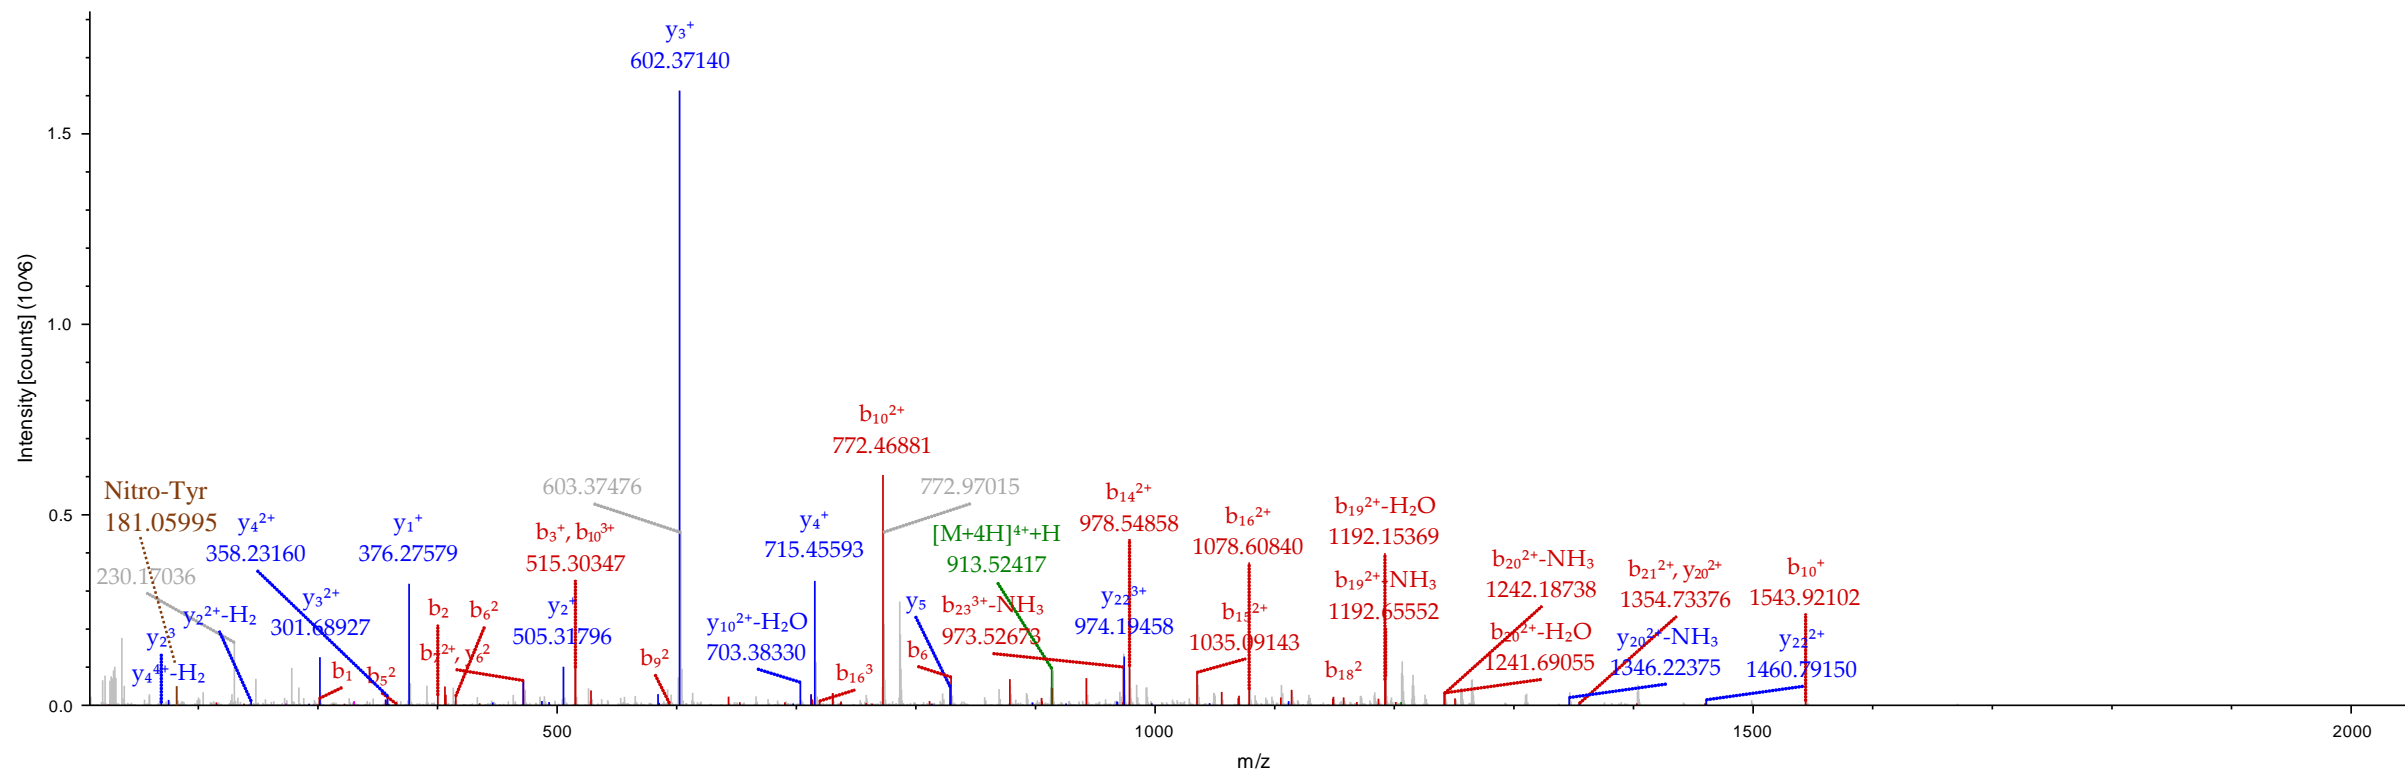

— Pre+H, Precursor, Precursor-H<sub>2</sub>O, Precursor-H<sub>2</sub>O-NH<sub>3</sub>, Precursor-NH<sub>3</sub>, Pre-H  
— y, y-H<sub>2</sub>O, y-NH<sub>3</sub>  
— Immonium  
— b, b-H<sub>2</sub>O, b-NH<sub>3</sub>

| #1 | Immonium  | b <sup>+</sup> | b <sup>2+</sup> | b <sup>3+</sup> | b <sup>4+</sup> | Seq.                       | y <sup>+</sup> | y <sup>2+</sup> | y <sup>3+</sup> | y <sup>4+</sup> | #2 |
|----|-----------|----------------|-----------------|-----------------|-----------------|----------------------------|----------------|-----------------|-----------------|-----------------|----|
| 1  | 362.20594 | 390.20086      | 195.60407       | 130.73847       | 98.30567        | C-TMT6plex-Carbamidomethyl |                |                 |                 |                 | 13 |
| 2  | 133.04301 | 550.23151      | 275.61939       | 184.08202       | 138.31333       | C-Carbamidomethyl          | 1666.71511     | 833.86119       | 556.24322       | 417.43423       | 12 |
| 3  | 44.04948  | 621.26862      | 311.13795       | 207.76106       | 156.07261       | A                          | 1506.68446     | 753.84587       | 502.89967       | 377.42657       | 11 |
| 4  | 44.04948  | 692.30573      | 346.65650       | 231.44010       | 173.83189       | A                          | 1435.64734     | 718.32731       | 479.22063       | 359.66729       | 10 |
| 5  | 44.04948  | 763.34285      | 382.17506       | 255.11913       | 191.59117       | A                          | 1364.61023     | 682.80875       | 455.54159       | 341.90802       | 9  |
| 6  | 88.03930  | 878.36979      | 439.68853       | 293.46145       | 220.34790       | D                          | 1293.57312     | 647.29020       | 431.86256       | 324.14874       | 8  |
| 7  | 70.06513  | 975.42255      | 488.21492       | 325.81237       | 244.61110       | P                          | 1178.54617     | 589.77673       | 393.52024       | 295.39200       | 7  |
| 8  | 110.07127 | 1112.48147     | 556.74437       | 371.49867       | 278.87582       | H                          | 1081.49341     | 541.25034       | 361.16932       | 271.12881       | 6  |
| 9  | 102.05496 | 1241.52406     | 621.26567       | 414.51287       | 311.13647       | E                          | 944.43450      | 472.72089       | 315.48302       | 236.86408       | 5  |
| 10 | 133.04301 | 1401.55471     | 701.28099       | 467.85642       | 351.14413       | C-Carbamidomethyl          | 815.39190      | 408.19959       | 272.46882       | 204.60343       | 4  |
| 11 | 181.06077 | 1609.60311     | 805.30519       | 537.20589       | 403.15624       | Y-Nitro                    | 655.36126      | 328.18427       | 219.12527       | 164.59577       | 3  |
| 12 | 44.04948  | 1680.64023     | 840.82375       | 560.88493       | 420.91551       | A                          | 447.31285      | 224.16006       | 149.77580       | 112.58367       | 2  |
| 13 | 330.27026 |                |                 |                 |                 | K-TMT6plex                 | 376.27574      | 188.64151       | 126.09676       | 94.82439        | 1  |

JM\_HuMarfanPlasma\_TMT5\_Fr3.raw #6286 RT: 24.5885 min  
 FTMS, 514.7274@hcd30.00, z=+4, Mono m/z=514.7274 Da, MH+=2055.88784 Da, Match Tol.=0.02 Da

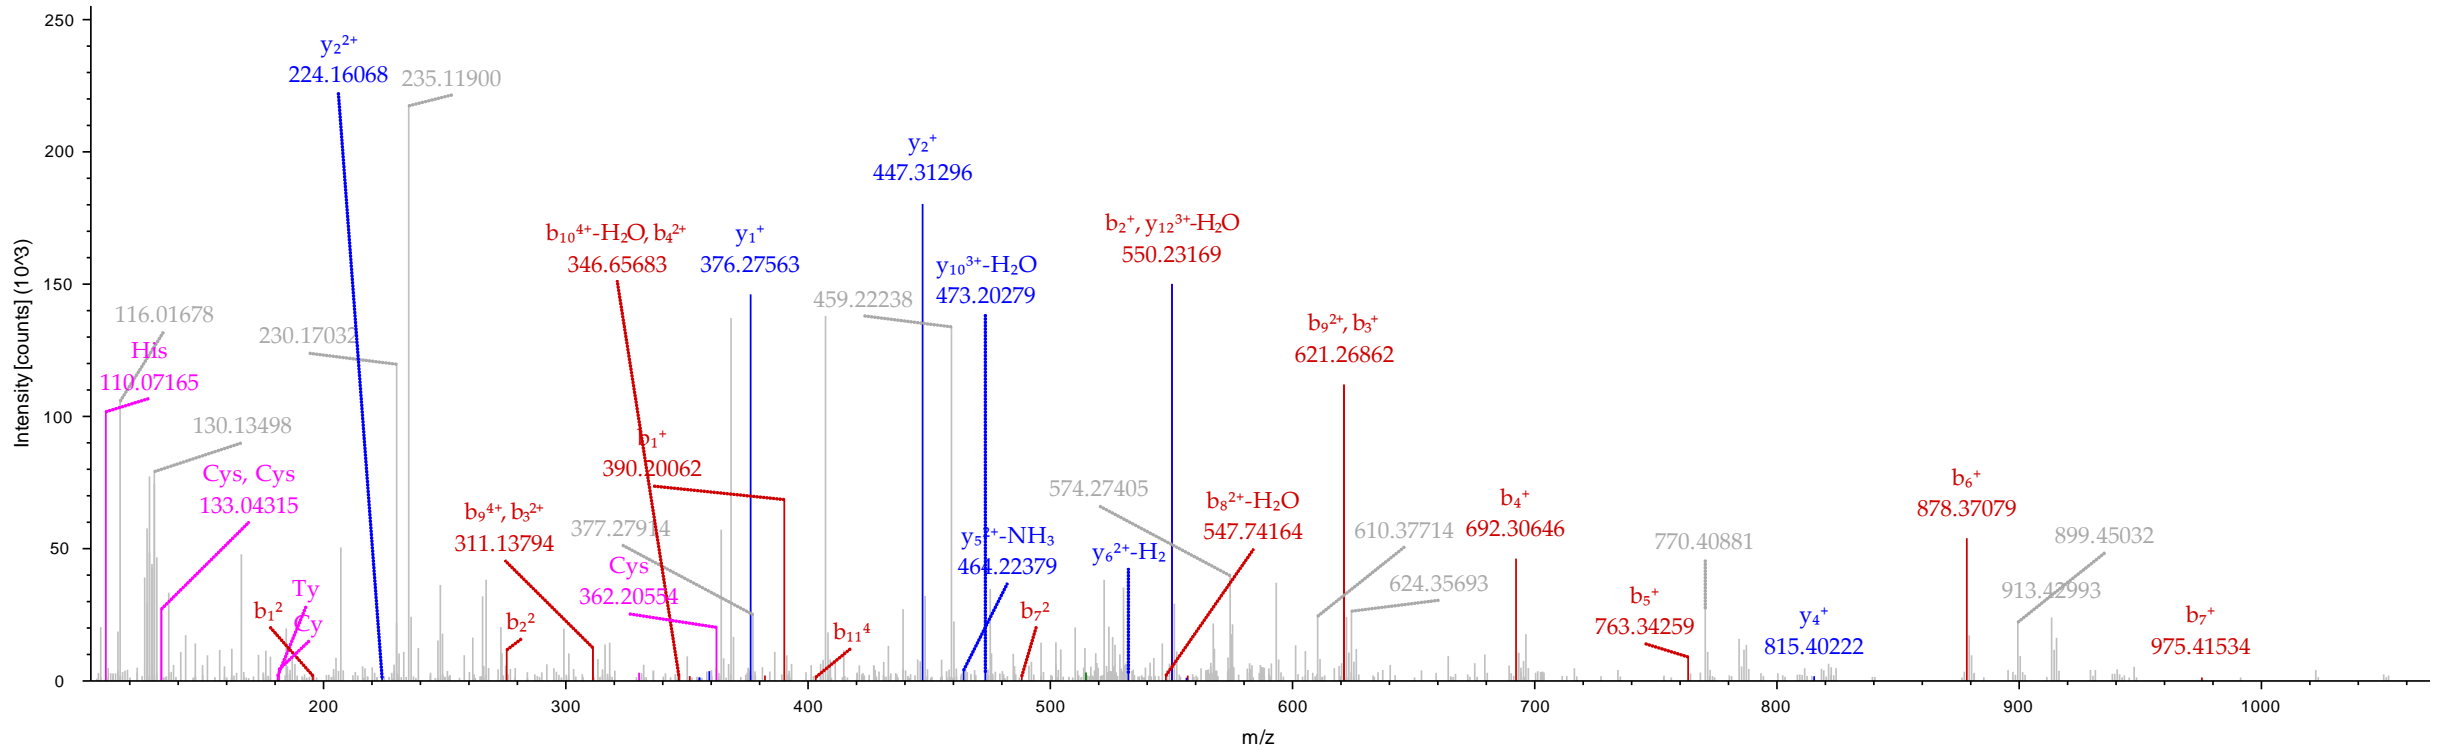

— Pre+H, Precursor, Precursor-H<sub>2</sub>O, Precursor-H<sub>2</sub>O-NH<sub>3</sub>, Precursor-NH<sub>3</sub>, Pre-H   
 — Immonium  
— y, y-H<sub>2</sub>O, y-NH<sub>3</sub>   
 — b, b-H<sub>2</sub>O, b-NH<sub>3</sub>

| #1 | Immonium  | b <sup>+</sup> | b <sup>2+</sup> | Seq.             | y <sup>+</sup> | y <sup>2+</sup> | #2 |
|----|-----------|----------------|-----------------|------------------|----------------|-----------------|----|
| 1  | 410.22370 | 438.21862      | 219.61295       | Y-TMT6plex-Nitro |                |                 | 7  |
| 2  | 86.09643  | 551.30268      | 276.15498       | L                | 764.43012      | 382.71870       | 6  |
| 3  | 136.07569 | 714.36601      | 357.68664       | Y                | 651.34605      | 326.17666       | 5  |
| 4  | 102.05496 | 843.40860      | 422.20794       | E                | 488.28272      | 244.64500       | 4  |
| 5  | 86.09643  | 956.49266      | 478.74997       | I                | 359.24013      | 180.12370       | 3  |
| 6  | 44.04948  | 1027.52978     | 514.26853       | A                | 246.15607      | 123.58167       | 2  |
| 7  | 129.11347 |                |                 | R                | 175.11895      | 88.06311        | 1  |

JM\_HuMarfanPlasma\_TMT1\_Fr2.raw #53593 RT: 163.3440 min  
 FTMS, 601.3247@hcd30.00, z=+2, Mono m/z=601.32428 Da, MH+=1201.64128 Da, Match Tol.=0.02 Da

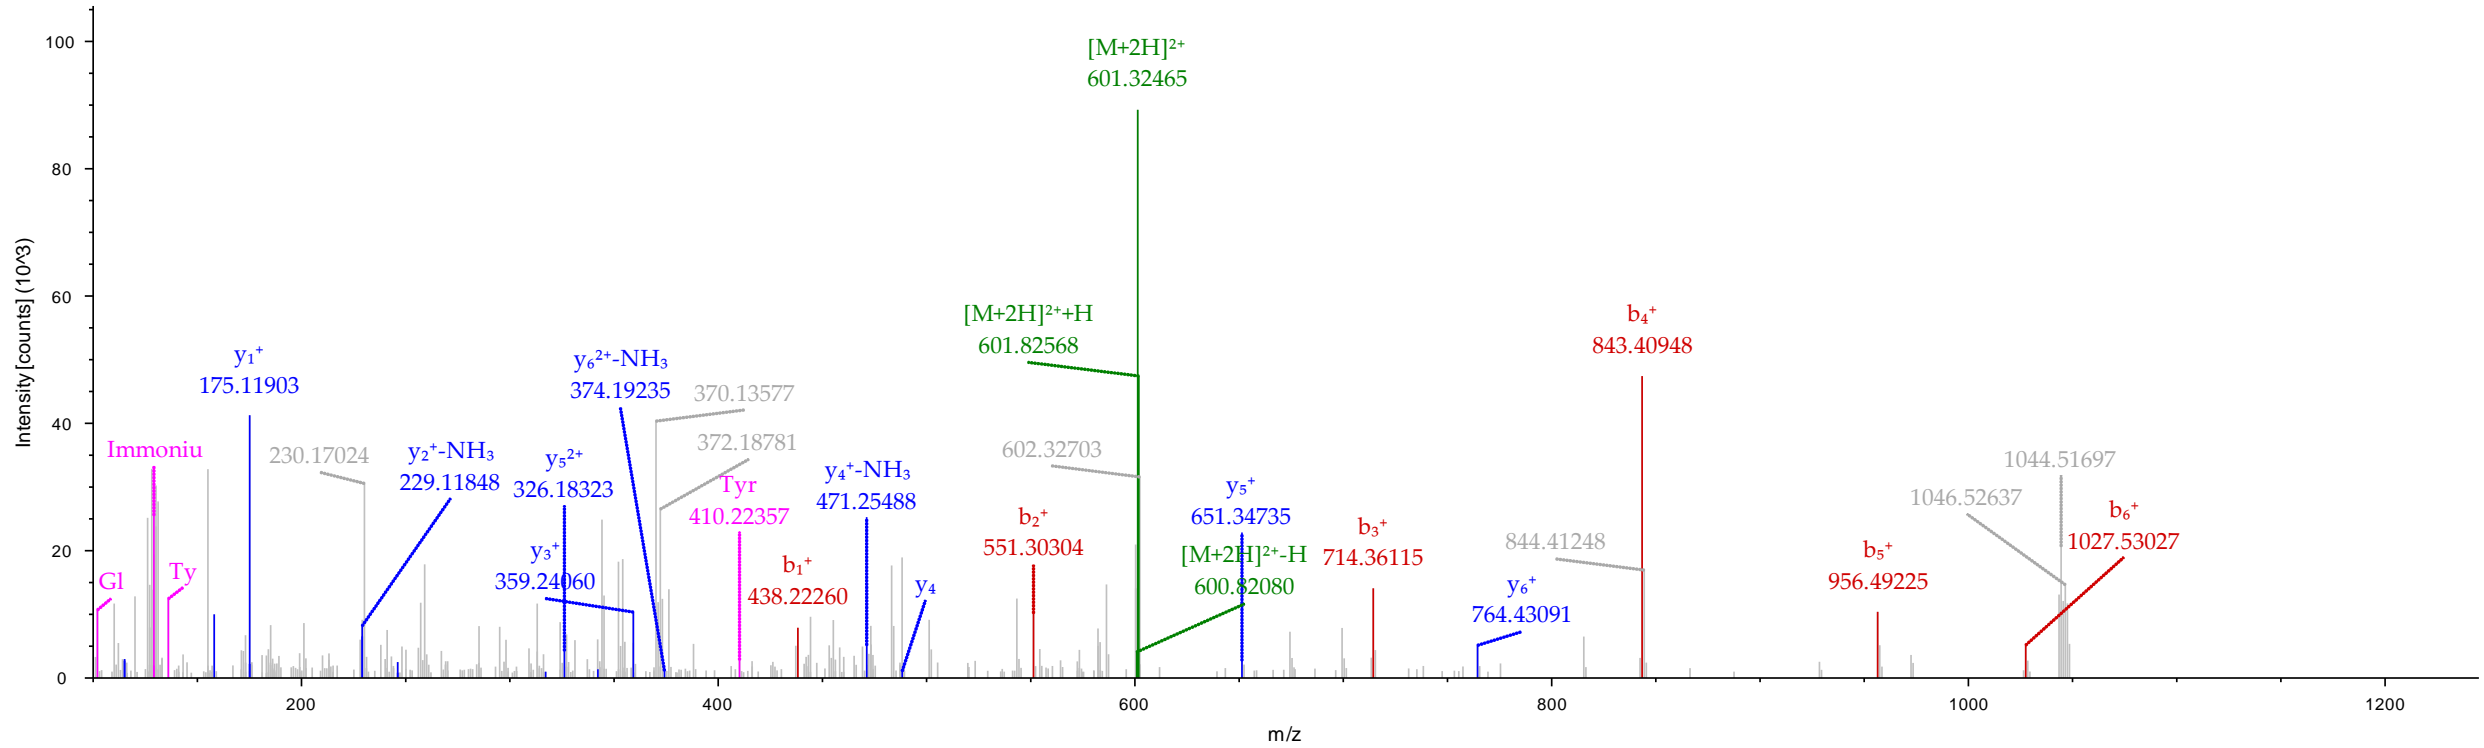

— Pre+H, Precursor, Precursor-H<sub>2</sub>O, Precursor-H<sub>2</sub>O-NH<sub>3</sub>, Precursor-NH<sub>3</sub>, Pre-H  
— y, y-H<sub>2</sub>O, y-NH<sub>3</sub>  
— Immonium  
— b, b-H<sub>2</sub>O, b-NH<sub>3</sub>



| #1 | Immonium  | b <sup>+</sup> | b <sup>2+</sup> | Seq.              | y <sup>+</sup> | y <sup>2+</sup> | #2 |
|----|-----------|----------------|-----------------|-------------------|----------------|-----------------|----|
| 1  | 410.22370 | 438.21862      | 219.61295       | Y-TMT6plex-Nitro  |                |                 | 12 |
| 2  | 86.09643  | 551.30268      | 276.15498       | I                 | 1509.74164     | 755.37446       | 11 |
| 3  | 133.04301 | 711.33333      | 356.17030       | C-Carbamidomethyl | 1396.65757     | 698.83243       | 10 |
| 4  | 102.05496 | 840.37592      | 420.69160       | E                 | 1236.62693     | 618.81710       | 9  |
| 5  | 87.05529  | 954.41885      | 477.71306       | N                 | 1107.58433     | 554.29580       | 8  |
| 6  | 101.07094 | 1082.47743     | 541.74235       | Q                 | 993.54141      | 497.27434       | 7  |
| 7  | 88.03930  | 1197.50437     | 599.25582       | D                 | 865.48283      | 433.24505       | 6  |
| 8  | 60.04439  | 1284.53640     | 642.77184       | S                 | 750.45589      | 375.73158       | 5  |
| 9  | 86.09643  | 1397.62046     | 699.31387       | I                 | 663.42386      | 332.21557       | 4  |
| 10 | 60.04439  | 1484.65249     | 742.82988       | S                 | 550.33979      | 275.67353       | 3  |
| 11 | 60.04439  | 1571.68452     | 786.34590       | S                 | 463.30776      | 232.15752       | 2  |
| 12 | 330.27026 |                |                 | K-TMT6plex        | 376.27574      | 188.64151       | 1  |

JM\_HuMarfanPlasma\_TMT2\_Fr2.raw #36980 RT: 106.7057 min  
 FTMS, 974.4851@hcd30.00, z=+2, Mono m/z=974.48511 Da, MH+=1947.96294 Da, Match Tol.=0.02 Da

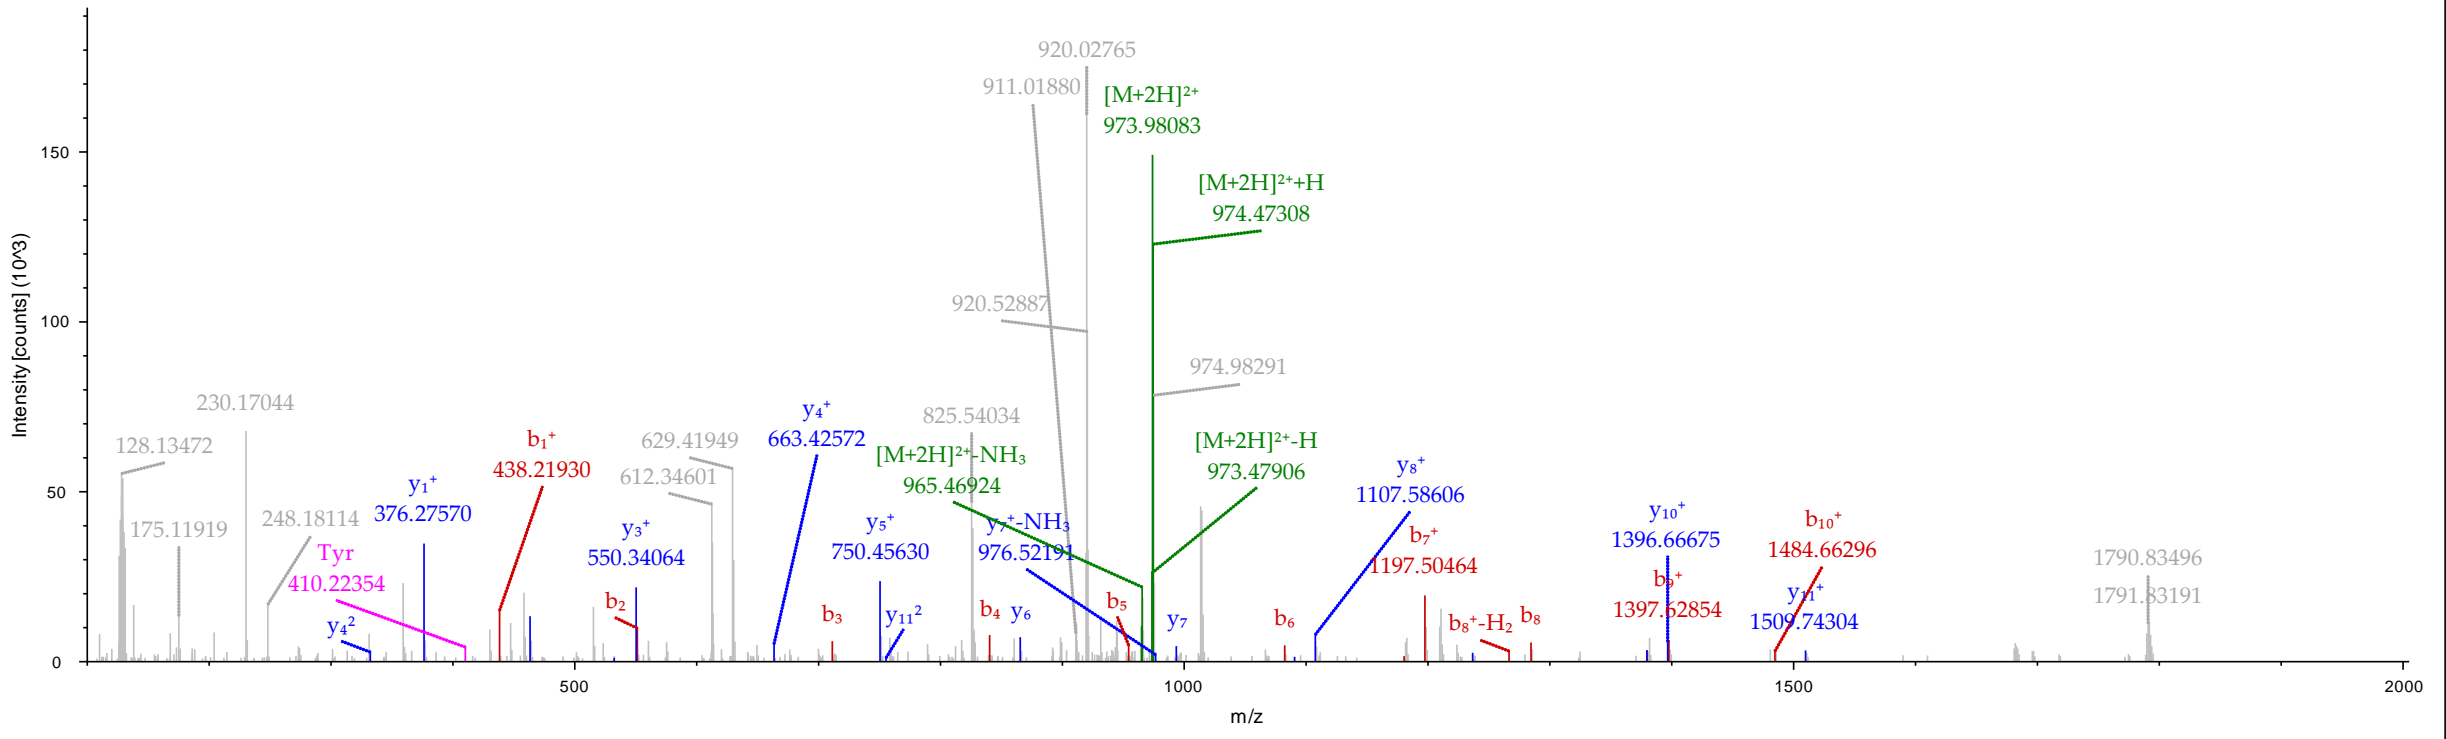

— Pre+H, Precursor, Precursor-H<sub>2</sub>O, Precursor-H<sub>2</sub>O-NH<sub>3</sub>, Precursor-NH<sub>3</sub>, Pre-H  
— y, y-H<sub>2</sub>O, y-NH<sub>3</sub>  
— Immonium  
— b, b-H<sub>2</sub>O, b-NH<sub>3</sub>

| #1 | Immonium  | b <sup>+</sup> | b <sup>2+</sup> | b <sup>3+</sup> | b <sup>4+</sup> | b <sup>5+</sup> | Seq.              | y <sup>+</sup> | y <sup>2+</sup> | y <sup>3+</sup> | y <sup>4+</sup> | y <sup>5+</sup> | #2 |
|----|-----------|----------------|-----------------|-----------------|-----------------|-----------------|-------------------|----------------|-----------------|-----------------|-----------------|-----------------|----|
| 1  | 358.27640 | 386.27132      | 193.63930       | 129.42862       | 97.32329        | 78.06009        | R-TMT6plex        |                |                 |                 |                 |                 | 22 |
| 2  | 104.05285 | 517.31180      | 259.15954       | 173.10879       | 130.08341       | 104.26818       | M                 | 2792.36187     | 1396.68457      | 931.45881       | 698.84593       | 559.27820       | 21 |
| 3  | 70.06513  | 614.36457      | 307.68592       | 205.45971       | 154.34660       | 123.67873       | P                 | 2661.32139     | 1331.16433      | 887.77865       | 666.08580       | 533.07010       | 20 |
| 4  | 133.04301 | 774.39522      | 387.70125       | 258.80326       | 194.35426       | 155.68486       | C-Carbamidomethyl | 2564.26862     | 1282.63795      | 855.42773       | 641.82261       | 513.65955       | 19 |
| 5  | 44.04948  | 845.43233      | 423.21980       | 282.48229       | 212.11354       | 169.89229       | A                 | 2404.23798     | 1202.62263      | 802.08418       | 601.81495       | 481.65342       | 18 |
| 6  | 102.05496 | 974.47492      | 487.74110       | 325.49649       | 244.37419       | 195.70081       | E                 | 2333.20086     | 1167.10407      | 778.40514       | 584.05567       | 467.44599       | 17 |
| 7  | 88.03930  | 1089.50187     | 545.25457       | 363.83881       | 273.13092       | 218.70619       | D                 | 2204.15827     | 1102.58277      | 735.39094       | 551.79502       | 441.63748       | 16 |
| 8  | 181.06077 | 1297.55027     | 649.27877       | 433.18828       | 325.14303       | 260.31588       | Y-Nitro           | 2089.13133     | 1045.06930      | 697.04863       | 523.03829       | 418.63209       | 15 |
| 9  | 86.09643  | 1410.63434     | 705.82081       | 470.88296       | 353.41404       | 282.93269       | L                 | 1881.08292     | 941.04510       | 627.69916       | 471.02619       | 377.02241       | 14 |
| 10 | 60.04439  | 1497.66636     | 749.33682       | 499.89364       | 375.17205       | 300.33909       | S                 | 1767.99886     | 884.50307       | 590.00447       | 442.75517       | 354.40559       | 13 |
| 11 | 72.08078  | 1596.73478     | 798.87103       | 532.91644       | 399.93915       | 320.15278       | V                 | 1680.96683     | 840.98705       | 560.99379       | 420.99716       | 336.99919       | 12 |
| 12 | 72.08078  | 1695.80319     | 848.40523       | 565.93925       | 424.70626       | 339.96646       | V                 | 1581.89841     | 791.45285       | 527.97099       | 396.23006       | 317.18550       | 11 |
| 13 | 86.09643  | 1808.88726     | 904.94727       | 603.63394       | 452.97727       | 362.58327       | L                 | 1482.83000     | 741.91864       | 494.94818       | 371.46296       | 297.37182       | 10 |
| 14 | 87.05529  | 1922.93018     | 961.96873       | 641.64825       | 481.48800       | 385.39186       | N                 | 1369.74594     | 685.37661       | 457.25350       | 343.19194       | 274.75501       | 9  |
| 15 | 101.07094 | 2050.98876     | 1025.99802      | 684.33444       | 513.50265       | 411.00357       | Q                 | 1255.70301     | 628.35514       | 419.23919       | 314.68121       | 251.94642       | 8  |
| 16 | 86.09643  | 2164.07283     | 1082.54005      | 722.02913       | 541.77366       | 433.62039       | L                 | 1127.64443     | 564.32585       | 376.55299       | 282.66657       | 226.33471       | 7  |
| 17 | 133.04301 | 2324.10347     | 1162.55538      | 775.37268       | 581.78133       | 465.62652       | C-Carbamidomethyl | 1014.56037     | 507.78382       | 338.85831       | 254.39555       | 203.71789       | 6  |
| 18 | 72.08078  | 2423.17189     | 1212.08958      | 808.39548       | 606.54843       | 485.44020       | V                 | 854.52972      | 427.76850       | 285.51476       | 214.38789       | 171.71177       | 5  |
| 19 | 86.09643  | 2536.25595     | 1268.63161      | 846.09017       | 634.81945       | 508.05701       | L                 | 755.46131      | 378.23429       | 252.49195       | 189.62078       | 151.89808       | 4  |
| 20 | 110.07127 | 2673.31486     | 1337.16107      | 891.77647       | 669.08417       | 535.46879       | H                 | 642.37724      | 321.69226       | 214.79726       | 161.34977       | 129.28127       | 3  |
| 21 | 102.05496 | 2802.35746     | 1401.68237      | 934.79067       | 701.34482       | 561.27731       | E                 | 505.31833      | 253.16280       | 169.11096       | 127.08504       | 101.86949       | 2  |
| 22 | 330.27026 |                |                 |                 |                 |                 | K-TMT6plex        | 376.27574      | 188.64151       | 126.09676       | 94.82439        | 76.06097        | 1  |

JM\_HuMarfanPlasma\_TMT2.raw #120103 RT: 330.9049 min  
 FTMS, 635.9478@hcd30.00, z=+5, Mono m/z=635.94775 Da, MH+=3175.70966 Da, Match Tol.=0.02 Da

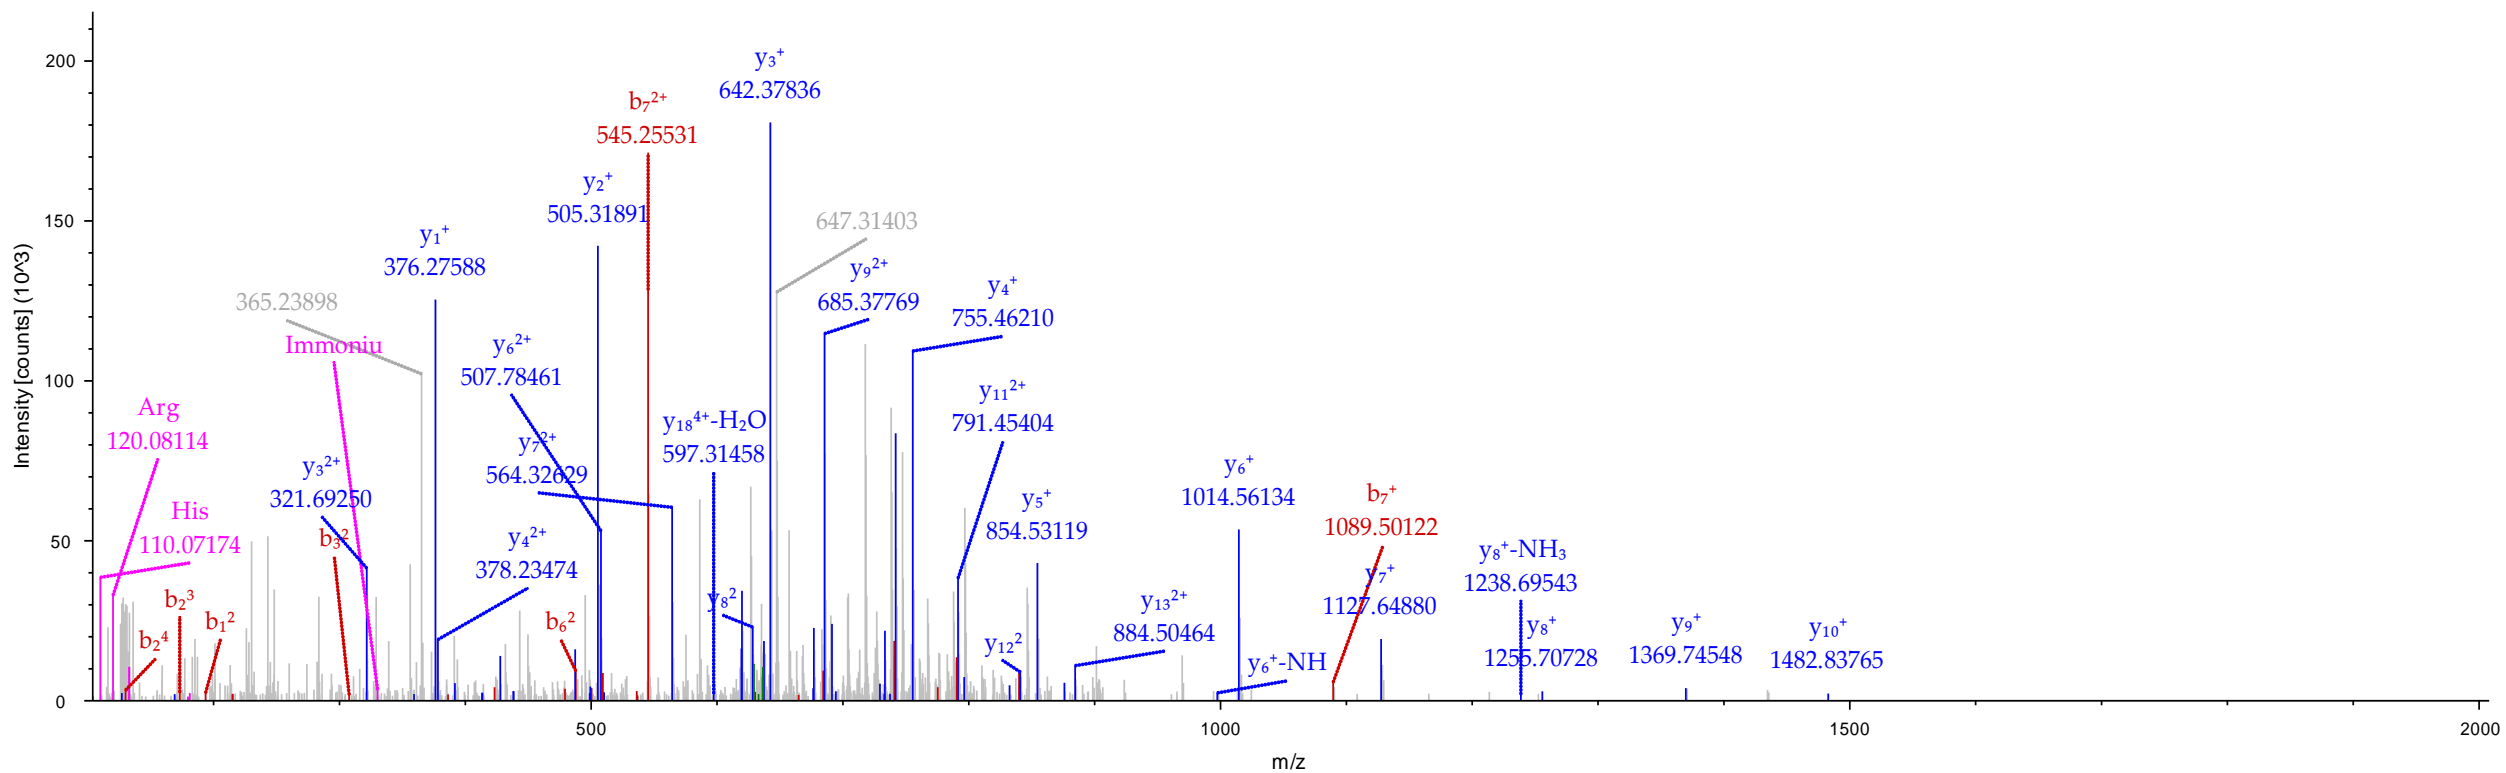

— Pre-H, Precursor, Precursor-H<sub>2</sub>O, Precursor-H<sub>2</sub>O-NH<sub>3</sub>, Precursor-NH<sub>3</sub>, Pre-H   
 — Immonium  
— y, y-H<sub>2</sub>O, y-NH<sub>3</sub>   
 — b, b-H<sub>2</sub>O, b-NH<sub>3</sub>

| #1 | Immonium  | b <sup>+</sup> | b <sup>2+</sup> | b <sup>3+</sup> | b <sup>4+</sup> | Seq.              | y <sup>+</sup> | y <sup>2+</sup> | y <sup>3+</sup> | y <sup>4+</sup> | #2 |
|----|-----------|----------------|-----------------|-----------------|-----------------|-------------------|----------------|-----------------|-----------------|-----------------|----|
| 1  | 358.27640 | 386.27132      | 193.63930       | 129.42862       | 97.32329        | R-TMT6plex        |                |                 |                 |                 | 16 |
| 2  | 70.06513  | 483.32408      | 242.16568       | 161.77955       | 121.58648       | P                 | 2028.97857     | 1014.99293      | 676.99771       | 508.00010       | 15 |
| 3  | 133.04301 | 643.35473      | 322.18100       | 215.12310       | 161.59414       | C-Carbamidomethyl | 1931.92581     | 966.46654       | 644.64679       | 483.73691       | 14 |
| 4  | 120.08078 | 790.42315      | 395.71521       | 264.14590       | 198.36124       | F                 | 1771.89516     | 886.45122       | 591.30324       | 443.72925       | 13 |
| 5  | 60.04439  | 877.45517      | 439.23123       | 293.15658       | 220.11925       | S                 | 1624.82675     | 812.91701       | 542.28043       | 406.96214       | 12 |
| 6  | 44.04948  | 948.49229      | 474.74978       | 316.83561       | 237.87853       | A                 | 1537.79472     | 769.40100       | 513.26976       | 385.20414       | 11 |
| 7  | 86.09643  | 1061.57635     | 531.29181       | 354.53030       | 266.14955       | L                 | 1466.75761     | 733.88244       | 489.59072       | 367.44486       | 10 |
| 8  | 102.05496 | 1190.61894     | 595.81311       | 397.54450       | 298.41019       | E                 | 1353.67354     | 677.34041       | 451.89603       | 339.17384       | 9  |
| 9  | 72.08078  | 1289.68736     | 645.34732       | 430.56730       | 323.17730       | V                 | 1224.63095     | 612.81911       | 408.88183       | 306.91319       | 8  |
| 10 | 88.03930  | 1404.71430     | 702.86079       | 468.90962       | 351.93403       | D                 | 1125.56253     | 563.28491       | 375.85903       | 282.14609       | 7  |
| 11 | 102.05496 | 1533.75689     | 767.38209       | 511.92382       | 384.19468       | E                 | 1010.53559     | 505.77143       | 337.51672       | 253.38936       | 6  |
| 12 | 74.06004  | 1634.80457     | 817.90592       | 545.60638       | 409.45660       | T                 | 881.49300      | 441.25014       | 294.50252       | 221.12871       | 5  |
| 13 | 181.06077 | 1842.85298     | 921.93013       | 614.95584       | 461.46870       | Y-Nitro           | 780.44532      | 390.72630       | 260.81996       | 195.86679       | 4  |
| 14 | 72.08078  | 1941.92139     | 971.46433       | 647.97865       | 486.23581       | V                 | 572.39691      | 286.70210       | 191.47049       | 143.85469       | 3  |
| 15 | 70.06513  | 2038.97416     | 1019.99072      | 680.32957       | 510.49900       | P                 | 473.32850      | 237.16789       | 158.44768       | 119.08758       | 2  |
| 16 | 330.27026 |                |                 |                 |                 | K-TMT6plex        | 376.27574      | 188.64151       | 126.09676       | 94.82439        | 1  |

JM\_HuMarfanPlasma\_TMT2\_Fr2.raw #62664 RT: 175.4913 min  
FTMS, 604.3168@hcd30.00, z=+4, Mono m/z=604.31683 Da, MH+=2414.24550 Da, Match Tol.=0.02 Da

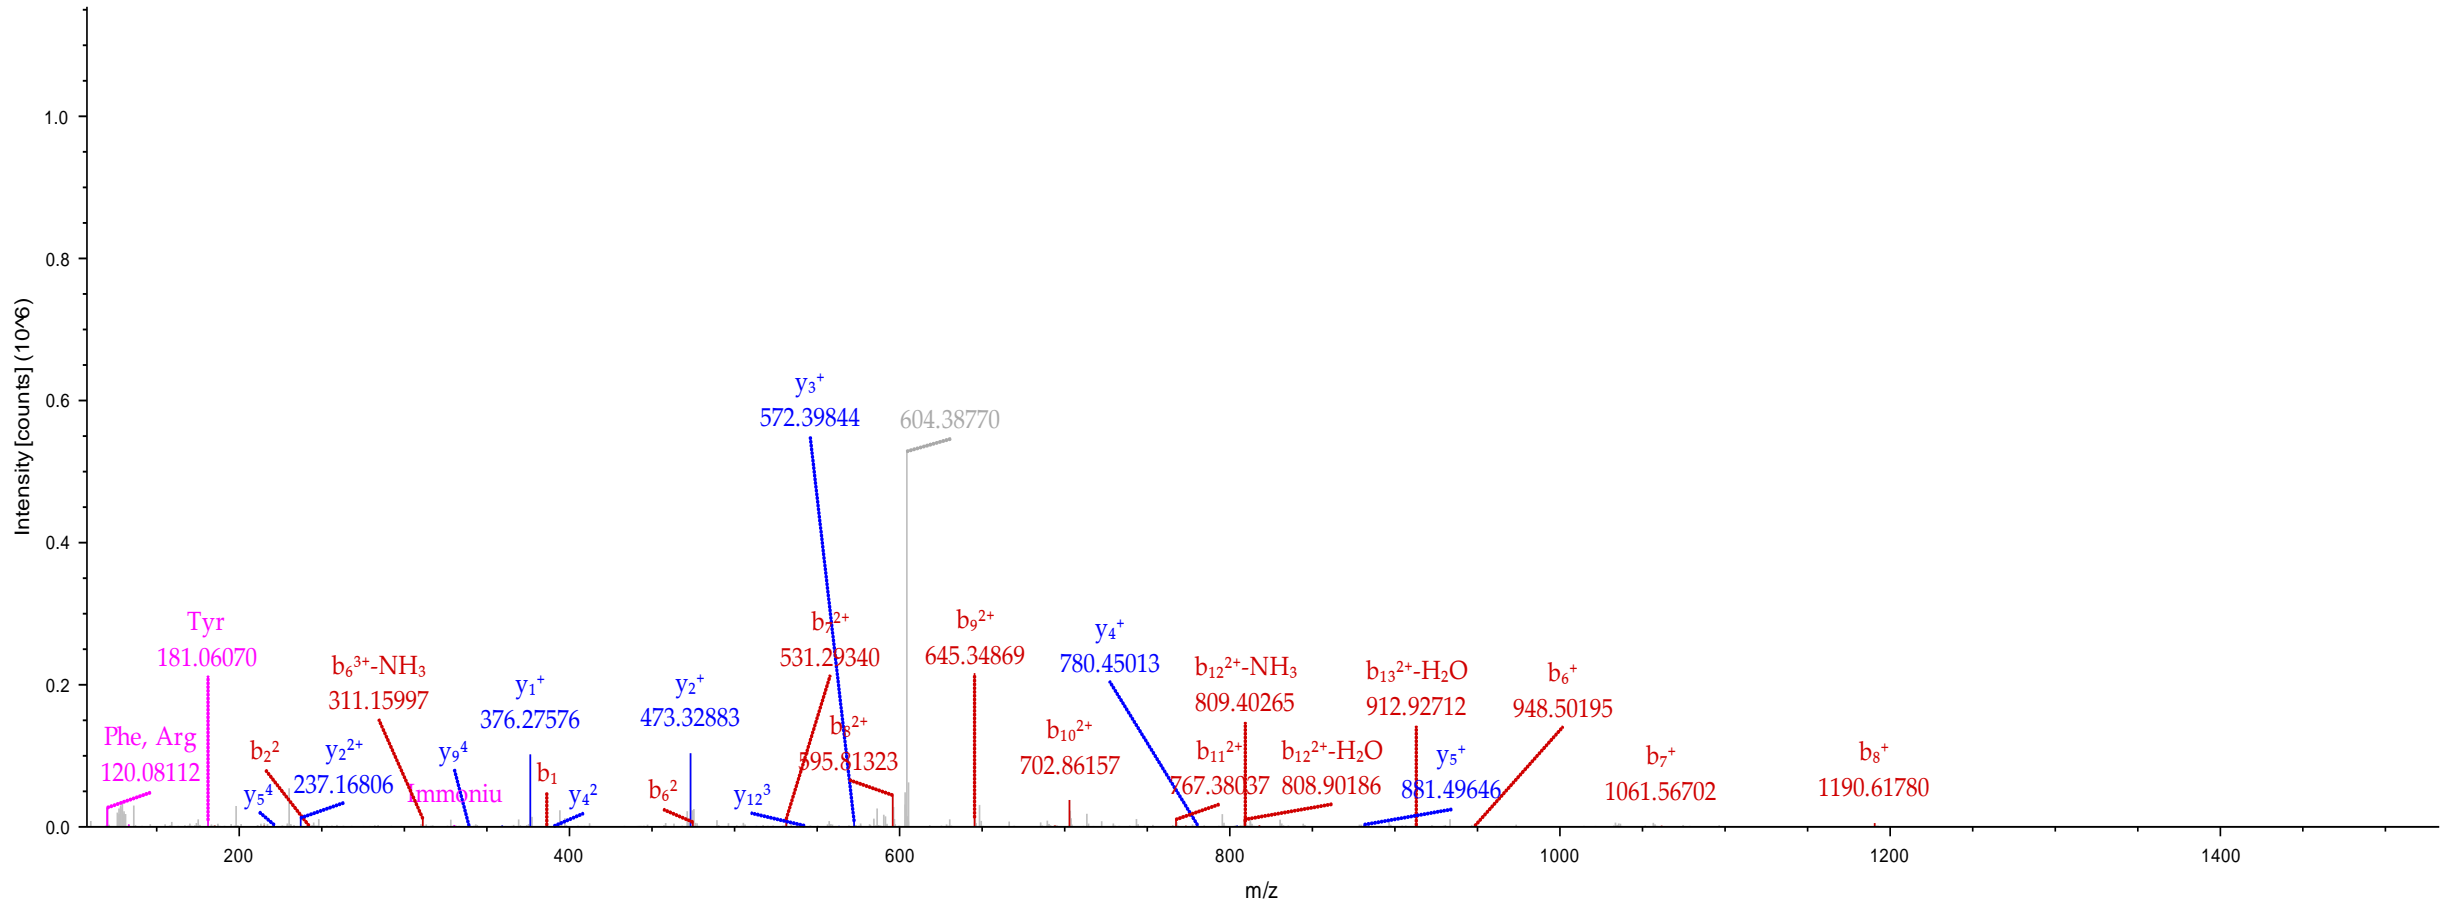

Pre+H, Precursor, Precursor-H<sub>2</sub>O, Precursor-H<sub>2</sub>O-NH<sub>3</sub>, Precursor-NH<sub>3</sub>, Pre-H Immonium

y, y-H<sub>2</sub>O, y-NH<sub>3</sub>

b, b-H<sub>2</sub>O, b-NH<sub>3</sub>

| #1 | Immonium  | b <sup>+</sup> | b <sup>2+</sup> | b <sup>3+</sup> | Seq.              | y <sup>+</sup> | y <sup>2+</sup> | y <sup>3+</sup> | #2 |
|----|-----------|----------------|-----------------|-----------------|-------------------|----------------|-----------------|-----------------|----|
| 1  | 333.21578 | 361.21069      | 181.10898       | 121.07508       | M-TMT6plex        |                |                 |                 | 21 |
| 2  | 70.06513  | 458.26346      | 229.63537       | 153.42600       | P                 | 2661.32139     | 1331.16433      | 887.77865       | 20 |
| 3  | 133.04301 | 618.29411      | 309.65069       | 206.76955       | C-Carbamidomethyl | 2564.26862     | 1282.63795      | 855.42773       | 19 |
| 4  | 44.04948  | 689.33122      | 345.16925       | 230.44859       | A                 | 2404.23798     | 1202.62263      | 802.08418       | 18 |
| 5  | 102.05496 | 818.37381      | 409.69054       | 273.46279       | E                 | 2333.20086     | 1167.10407      | 778.40514       | 17 |
| 6  | 88.03930  | 933.40076      | 467.20402       | 311.80510       | D                 | 2204.15827     | 1102.58277      | 735.39094       | 16 |
| 7  | 181.06077 | 1141.44916     | 571.22822       | 381.15457       | Y-Nitro           | 2089.13133     | 1045.06930      | 697.04863       | 15 |
| 8  | 86.09643  | 1254.53323     | 627.77025       | 418.84926       | L                 | 1881.08292     | 941.04510       | 627.69916       | 14 |
| 9  | 60.04439  | 1341.56525     | 671.28627       | 447.85994       | S                 | 1767.99886     | 884.50307       | 590.00447       | 13 |
| 10 | 72.08078  | 1440.63367     | 720.82047       | 480.88274       | V                 | 1680.96683     | 840.98705       | 560.99379       | 12 |
| 11 | 72.08078  | 1539.70208     | 770.35468       | 513.90554       | V                 | 1581.89841     | 791.45285       | 527.97099       | 11 |
| 12 | 86.09643  | 1652.78615     | 826.89671       | 551.60023       | L                 | 1482.83000     | 741.91864       | 494.94818       | 10 |
| 13 | 87.05529  | 1766.82907     | 883.91817       | 589.61454       | N                 | 1369.74594     | 685.37661       | 457.25350       | 9  |
| 14 | 101.07094 | 1894.88765     | 947.94746       | 632.30073       | Q                 | 1255.70301     | 628.35514       | 419.23919       | 8  |
| 15 | 86.09643  | 2007.97171     | 1004.48950      | 669.99542       | L                 | 1127.64443     | 564.32585       | 376.55299       | 7  |
| 16 | 133.04301 | 2168.00236     | 1084.50482      | 723.33897       | C-Carbamidomethyl | 1014.56037     | 507.78382       | 338.85831       | 6  |
| 17 | 72.08078  | 2267.07078     | 1134.03903      | 756.36178       | V                 | 854.52972      | 427.76850       | 285.51476       | 5  |
| 18 | 86.09643  | 2380.15484     | 1190.58106      | 794.05646       | L                 | 755.46131      | 378.23429       | 252.49195       | 4  |
| 19 | 110.07127 | 2517.21375     | 1259.11051      | 839.74277       | H                 | 642.37724      | 321.69226       | 214.79726       | 3  |
| 20 | 102.05496 | 2646.25635     | 1323.63181      | 882.75697       | E                 | 505.31833      | 253.16280       | 169.11096       | 2  |
| 21 | 330.27026 |                |                 |                 | K-TMT6plex        | 376.27574      | 188.64151       | 126.09676       | 1  |

JM\_HuMarfanPlasma\_TMT2.raw #135470 RT: 374.3257 min  
FTMS, 1007.5230@hcd30.00, z=+3, Mono m/z=1007.52301 Da, MH+=3020.55448 Da, Match Tol.=0.02 Da

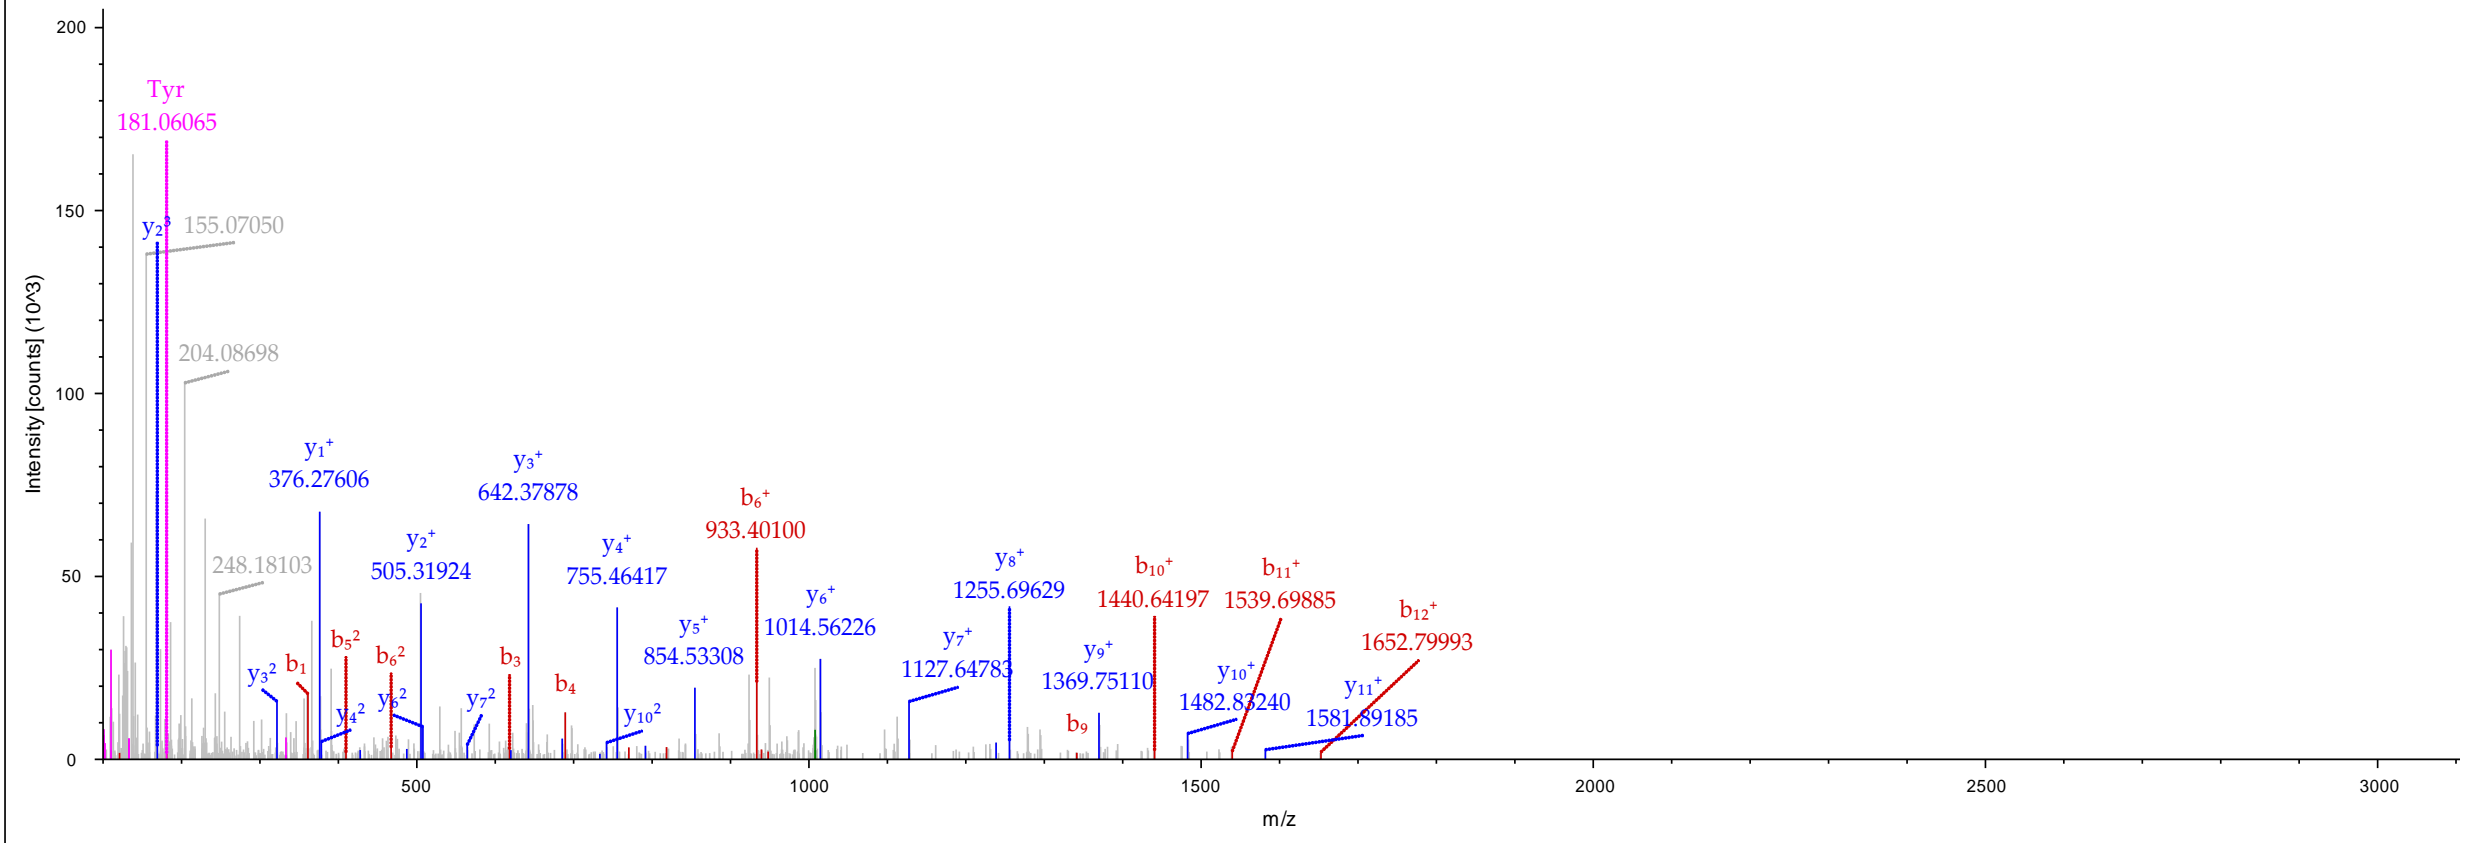

— Pre+H, Precursor, Precursor-H<sub>2</sub>O, Precursor-H<sub>2</sub>O-NH<sub>3</sub>, Precursor-NH<sub>3</sub>, Pre-H — Immonium  
— y, y-H<sub>2</sub>O, y-NH<sub>3</sub> — b, b-H<sub>2</sub>O, b-NH<sub>3</sub>



| #1 | Immonium  | b <sup>+</sup> | b <sup>2+</sup> | b <sup>3+</sup> | Seq.       | y <sup>+</sup> | y <sup>2+</sup> | y <sup>3+</sup> | #2 |
|----|-----------|----------------|-----------------|-----------------|------------|----------------|-----------------|-----------------|----|
| 1  | 358.27640 | 386.27132      | 193.63930       | 129.42862       | R-TMT6plex |                |                 |                 | 12 |
| 2  | 110.07127 | 523.33023      | 262.16875       | 175.11493       | H          | 1356.72703     | 678.86715       | 452.91386       | 11 |
| 3  | 70.06513  | 620.38300      | 310.69514       | 207.46585       | P          | 1219.66811     | 610.33769       | 407.22756       | 10 |
| 4  | 88.03930  | 735.40994      | 368.20861       | 245.80816       | D          | 1122.61535     | 561.81131       | 374.87663       | 9  |
| 5  | 181.06077 | 943.45834      | 472.23281       | 315.15763       | Y-Nitro    | 1007.58841     | 504.29784       | 336.53432       | 8  |
| 6  | 60.04439  | 1030.49037     | 515.74882       | 344.16831       | S          | 799.54000      | 400.27364       | 267.18485       | 7  |
| 7  | 72.08078  | 1129.55879     | 565.28303       | 377.19111       | V          | 712.50797      | 356.75762       | 238.17418       | 6  |
| 8  | 72.08078  | 1228.62720     | 614.81724       | 410.21392       | V          | 613.43956      | 307.22342       | 205.15137       | 5  |
| 9  | 86.09643  | 1341.71126     | 671.35927       | 447.90861       | L          | 514.37114      | 257.68921       | 172.12857       | 4  |
| 10 | 86.09643  | 1454.79533     | 727.90130       | 485.60329       | L          | 401.28708      | 201.14718       | 134.43388       | 3  |
| 11 | 86.09643  | 1567.87939     | 784.44333       | 523.29798       | L          | 288.20302      | 144.60515       | 96.73919        | 2  |
| 12 | 129.11347 |                |                 |                 | R          | 175.11895      | 88.06311        | 59.04450        | 1  |

Nitro-Tyr immonium ion is detected in MS/MS spectra and added brown colored in the following spectrum

JM\_HuMarfanPlasma\_TMT6.raw #33793 RT: 102.1989 min  
 FTMS, 581.3231 @hcd30.00, z=+3, Mono m/z=581.32312 Da, MH+=1741.95481 Da, Match Tol.=0.02 Da

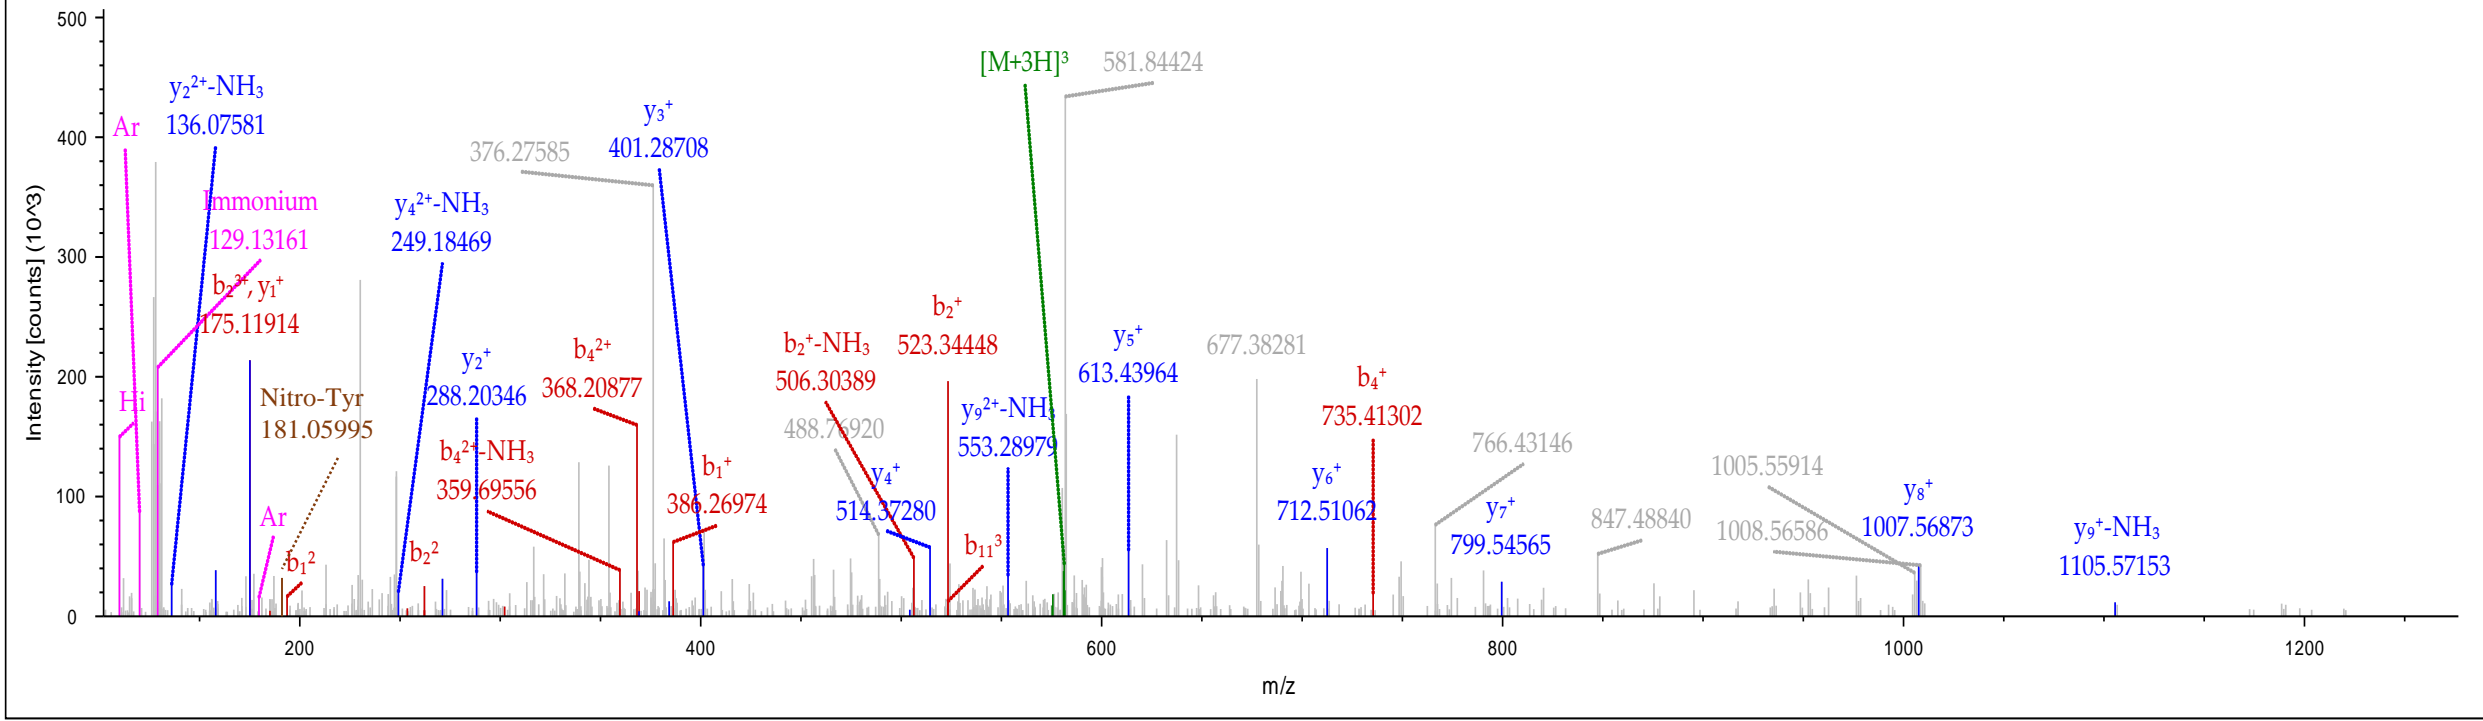

— Pre+H, Precursor, Precursor-H<sub>2</sub>O, Precursor-H<sub>2</sub>O-NH<sub>3</sub>, Precursor-NH<sub>3</sub>, Pre-H  
— y, y-H<sub>2</sub>O, y-NH<sub>3</sub>  
— Immonium  
— b, b-H<sub>2</sub>O, b-NH<sub>3</sub>

| #1 | Immonium  | b <sup>+</sup> | b <sup>2+</sup> | b <sup>3+</sup> | Seq.              | y <sup>+</sup> | y <sup>2+</sup> | y <sup>3+</sup> | #2 |
|----|-----------|----------------|-----------------|-----------------|-------------------|----------------|-----------------|-----------------|----|
| 1  | 330.23387 | 358.22879      | 179.61803       | 120.08111       | Q-TMT6plex        |                |                 |                 | 13 |
| 2  | 87.05529  | 472.27171      | 236.63950       | 158.09542       | N                 | 1803.84208     | 902.42468       | 601.95221       | 12 |
| 3  | 133.04301 | 632.30236      | 316.65482       | 211.43897       | C-Carbamidomethyl | 1689.79915     | 845.40321       | 563.93790       | 11 |
| 4  | 102.05496 | 761.34495      | 381.17612       | 254.45317       | E                 | 1529.76850     | 765.38789       | 510.59435       | 10 |
| 5  | 86.09643  | 874.42902      | 437.71815       | 292.14786       | L                 | 1400.72591     | 700.86659       | 467.58015       | 9  |
| 6  | 120.08078 | 1021.49743     | 511.25235       | 341.17066       | F                 | 1287.64185     | 644.32456       | 429.88547       | 8  |
| 7  | 102.05496 | 1150.54003     | 575.77365       | 384.18486       | E                 | 1140.57343     | 570.79036       | 380.86266       | 7  |
| 8  | 101.07094 | 1278.59860     | 639.80294       | 426.87105       | Q                 | 1011.53084     | 506.26906       | 337.84846       | 6  |
| 9  | 86.09643  | 1391.68267     | 696.34497       | 464.56574       | L                 | 883.47226      | 442.23977       | 295.16227       | 5  |
| 10 | 30.03383  | 1448.70413     | 724.85570       | 483.57289       | G                 | 770.38820      | 385.69774       | 257.46758       | 4  |
| 11 | 102.05496 | 1577.74672     | 789.37700       | 526.58709       | E                 | 713.36674      | 357.18701       | 238.46043       | 3  |
| 12 | 181.06077 | 1785.79513     | 893.40120       | 595.93656       | Y-Nitro           | 584.32414      | 292.66571       | 195.44623       | 2  |
| 13 | 330.27026 |                |                 |                 | K-TMT6plex        | 376.27574      | 188.64151       | 126.09676       | 1  |

Nitro-Tyr immonium ion is detected in MS/MS spectra and added brown colored in the following spectrum

JM\_HuMarfanPlasma\_TMT2\_Fr2.raw #85644 RT: 239.8003 min  
 FTMS, 721.3630@hcd30.00, z=+3, Mono m/z=721.02789 Da, MH+=2161.06913 Da, Match Tol.=0.02 Da

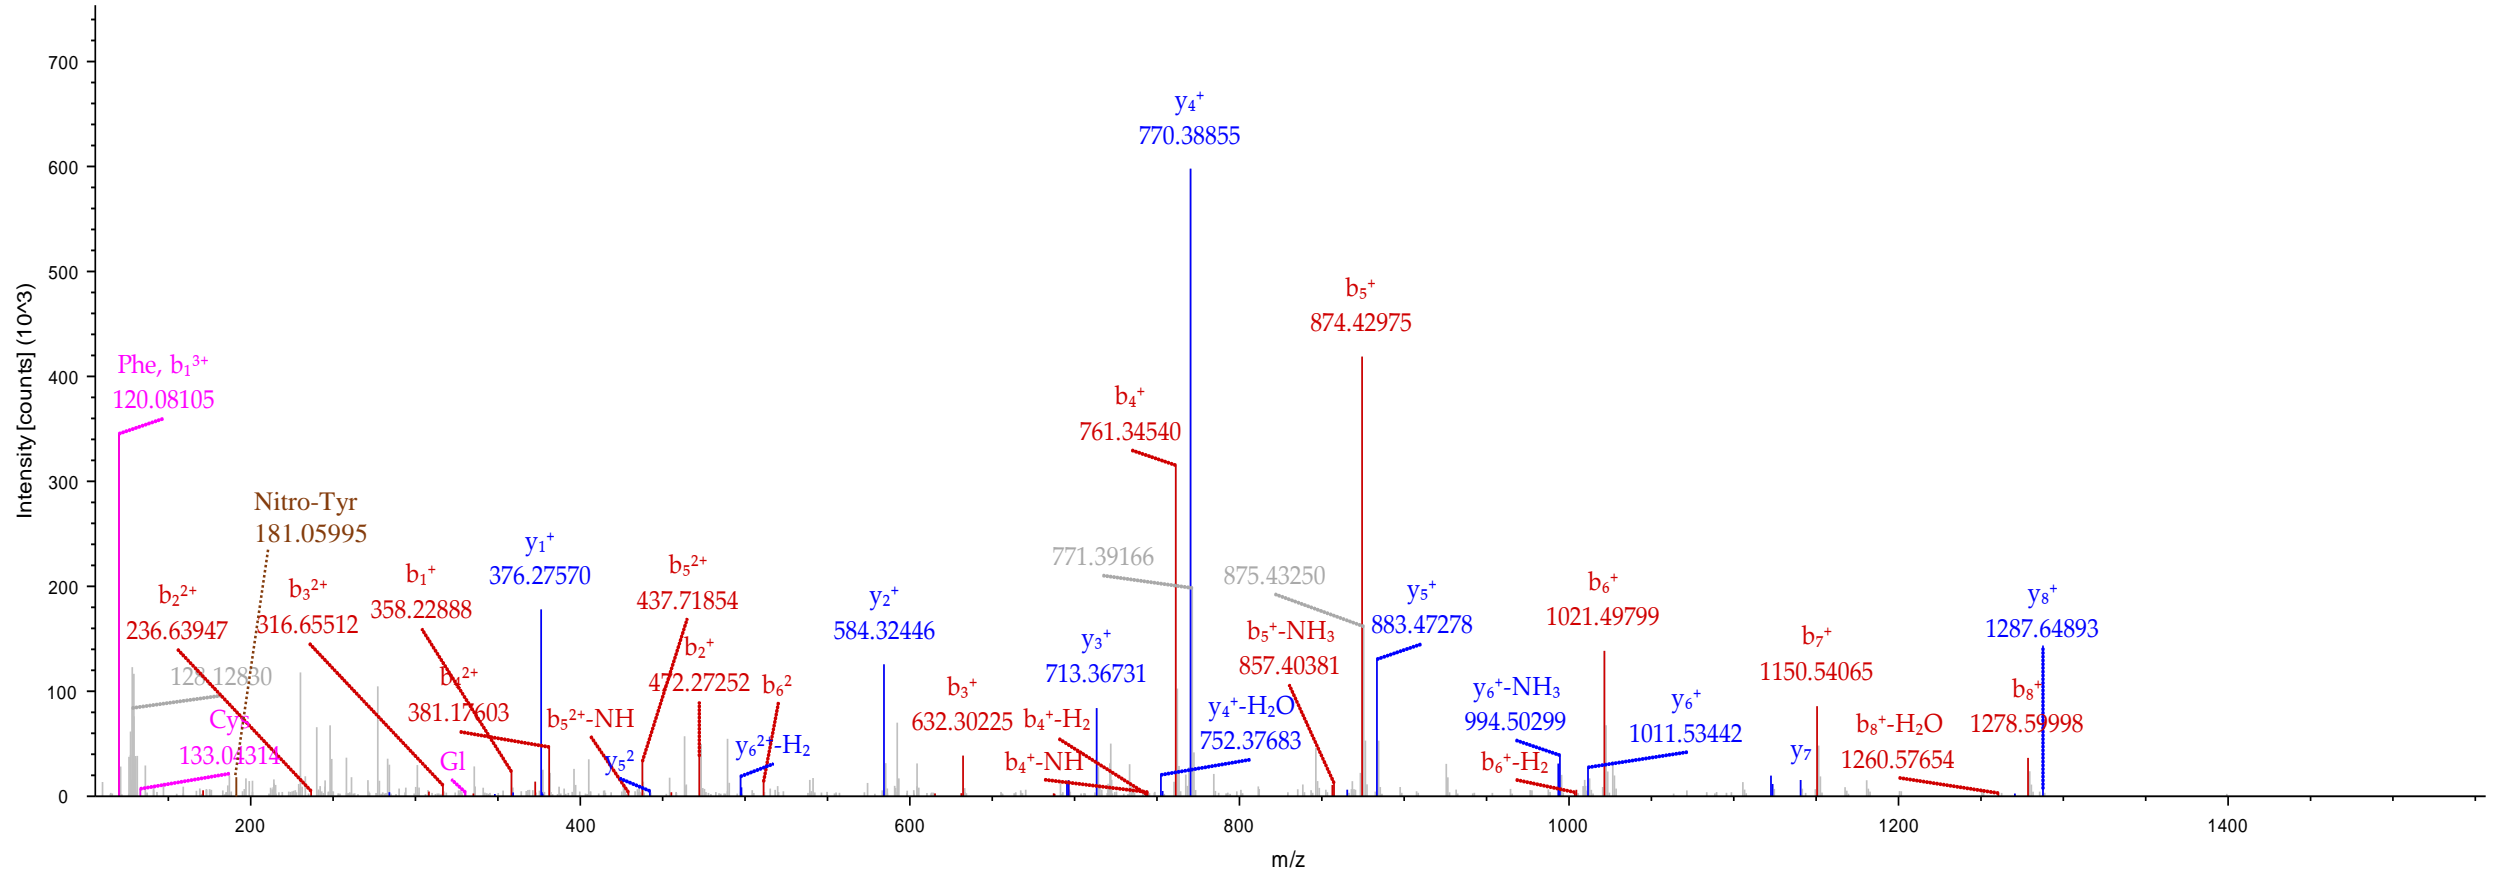

— Pre-H, Precursor, Precursor-H<sub>2</sub>O, Precursor-H<sub>2</sub>O-NH<sub>3</sub>, Precursor-NH<sub>3</sub>, Pre-H  
— y, y-H<sub>2</sub>O, y-NH<sub>3</sub>  
— Immonium  
— b, b-H<sub>2</sub>O, b-NH<sub>3</sub>

| #1 | Immonium  | b <sup>+</sup> | b <sup>2+</sup> | Seq.       | y <sup>+</sup> | y <sup>2+</sup> | #2 |
|----|-----------|----------------|-----------------|------------|----------------|-----------------|----|
| 1  | 317.20224 | 345.19715      | 173.10221       | D-TMT6plex |                |                 | 13 |
| 2  | 181.06077 | 553.24556      | 277.12642       | Y-Nitro    | 1559.79030     | 780.39879       | 12 |
| 3  | 72.08078  | 652.31397      | 326.66062       | V          | 1351.74190     | 676.37459       | 11 |
| 4  | 60.04439  | 739.34600      | 370.17664       | S          | 1252.67348     | 626.84038       | 10 |
| 5  | 101.07094 | 867.40458      | 434.20593       | Q          | 1165.64145     | 583.32437       | 9  |
| 6  | 120.08078 | 1014.47299     | 507.74013       | F          | 1037.58288     | 519.29508       | 8  |
| 7  | 102.05496 | 1143.51558     | 572.26143       | E          | 890.51446      | 445.76087       | 7  |
| 8  | 30.03383  | 1200.53705     | 600.77216       | G          | 761.47187      | 381.23957       | 6  |
| 9  | 60.04439  | 1287.56908     | 644.28818       | S          | 704.45041      | 352.72884       | 5  |
| 10 | 44.04948  | 1358.60619     | 679.80673       | A          | 617.41838      | 309.21283       | 4  |
| 11 | 86.09643  | 1471.69025     | 736.34877       | L          | 546.38126      | 273.69427       | 3  |
| 12 | 30.03383  | 1528.71172     | 764.85950       | G          | 433.29720      | 217.15224       | 2  |
| 13 | 330.27026 |                |                 | K-TMT6plex | 376.27574      | 188.64151       | 1  |

Nitro-Tyr immonium ion is detected in MS/MS spectra and added brown colored in the following spectrum

JM\_HuMarfanPlasma\_TMT1.raw #81811 RT: 229.1467 min  
 FTMS, 953.0040@hcd30.00, z=+2, Mono m/z=953.00397 Da, MH+=1905.00066 Da, Match Tol.=0.02 Da

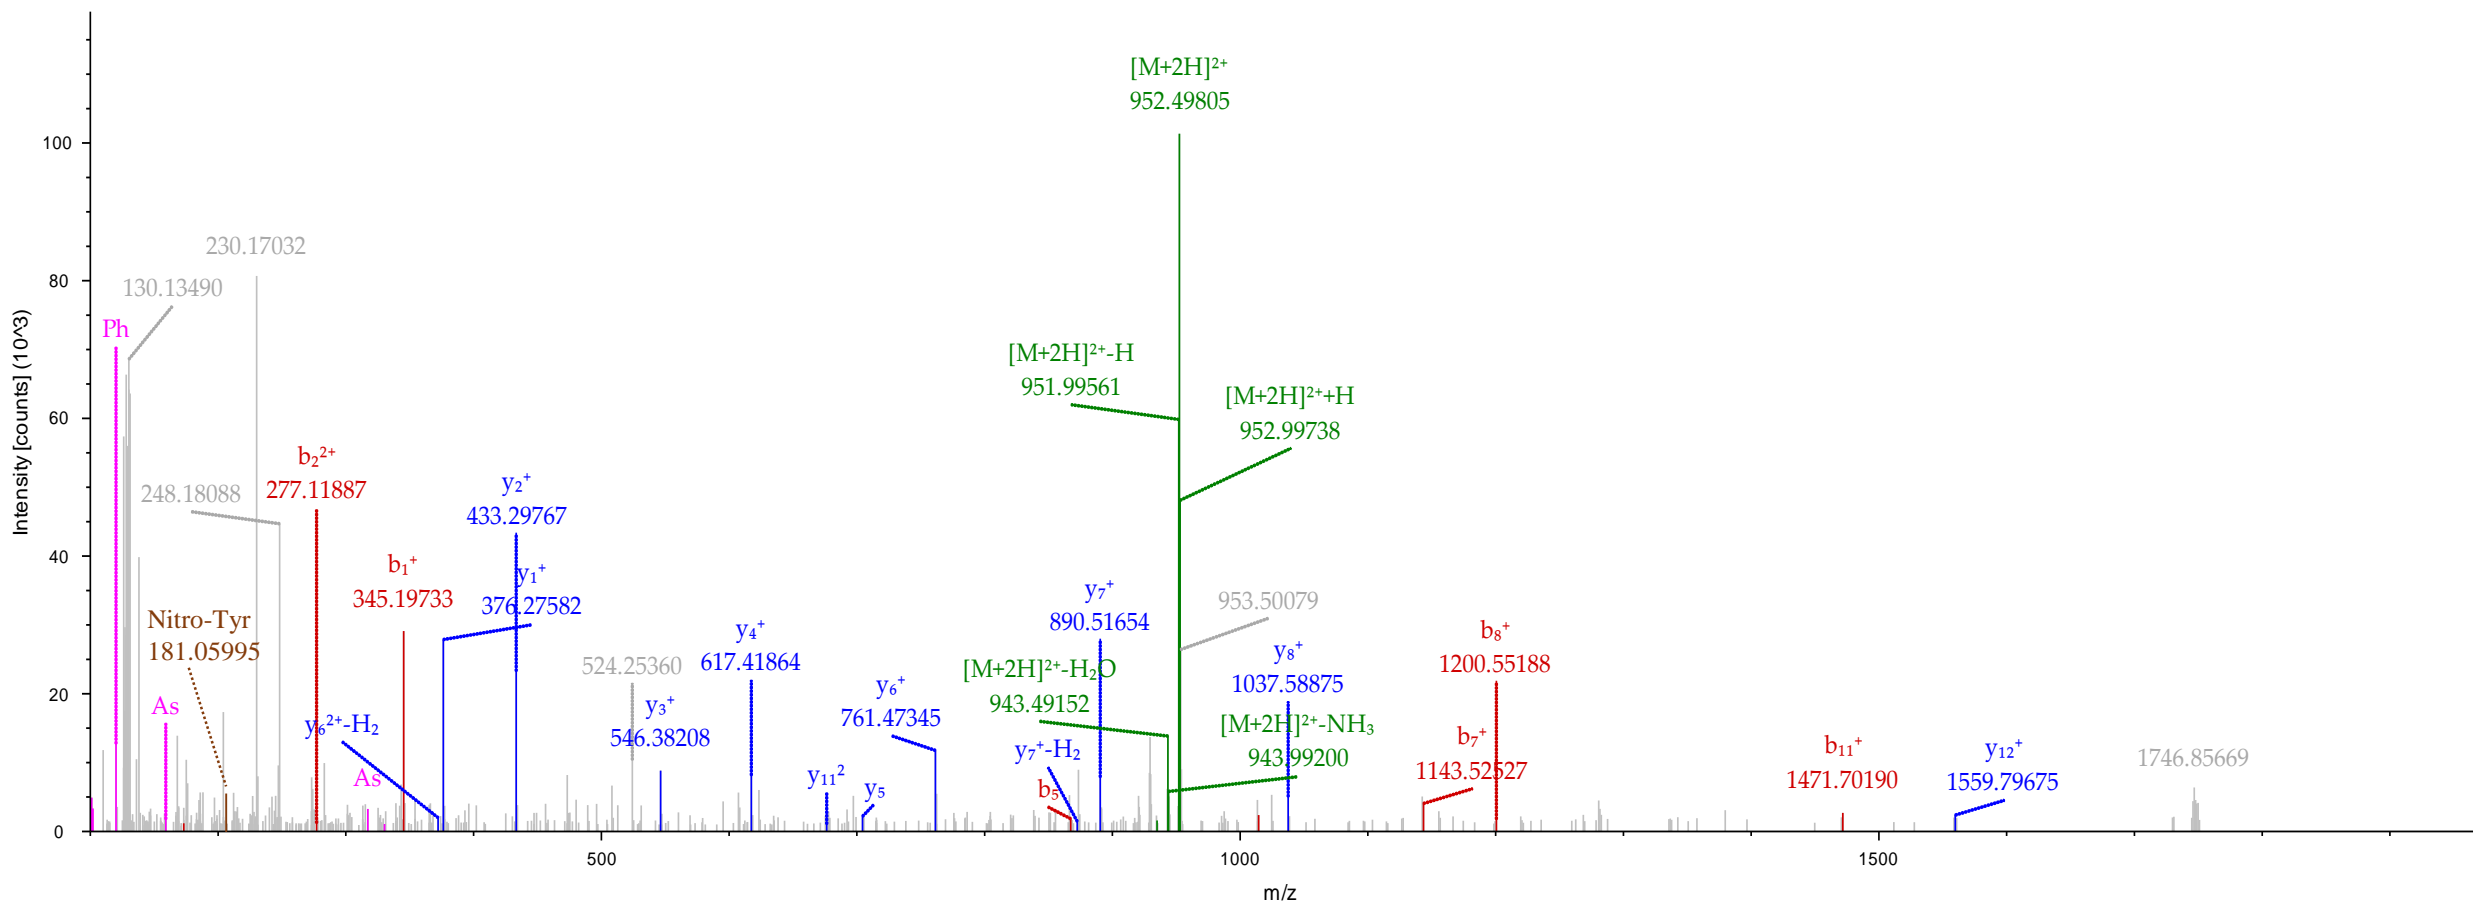

— Pre+H, Precursor, Precursor-H<sub>2</sub>O, Precursor-H<sub>2</sub>O-NH<sub>3</sub>, Precursor-NH<sub>3</sub>, Pre-H  
— y, y-H<sub>2</sub>O, y-NH<sub>3</sub>  
— Immonium  
— b, b-H<sub>2</sub>O, b-NH<sub>3</sub>

| #1 | Immonium  | b <sup>+</sup> | b <sup>2+</sup> | Seq.       | y <sup>+</sup> | y <sup>2+</sup> | #2 |
|----|-----------|----------------|-----------------|------------|----------------|-----------------|----|
| 1  | 315.25936 | 343.25427      | 172.13077       | L-TMT6plex |                |                 | 14 |
| 2  | 86.09643  | 456.33834      | 228.67281       | L          | 1773.84927     | 887.42828       | 13 |
| 3  | 88.03930  | 571.36528      | 286.18628       | D          | 1660.76521     | 830.88624       | 12 |
| 4  | 87.05529  | 685.40821      | 343.20774       | N          | 1545.73827     | 773.37277       | 11 |
| 5  | 204.07675 | 916.47260      | 458.73994       | W-Nitro    | 1431.69534     | 716.35131       | 10 |
| 6  | 88.03930  | 1031.49954     | 516.25341       | D          | 1200.63095     | 600.81911       | 9  |
| 7  | 60.04439  | 1118.53157     | 559.76942       | S          | 1085.60401     | 543.30564       | 8  |
| 8  | 72.08078  | 1217.59998     | 609.30363       | V          | 998.57198      | 499.78963       | 7  |
| 9  | 74.06004  | 1318.64766     | 659.82747       | T          | 899.50356      | 450.25542       | 6  |
| 10 | 60.04439  | 1405.67969     | 703.34348       | S          | 798.45589      | 399.73158       | 5  |
| 11 | 74.06004  | 1506.72737     | 753.86732       | T          | 711.42386      | 356.21557       | 4  |
| 12 | 120.08078 | 1653.79578     | 827.40153       | F          | 610.37618      | 305.69173       | 3  |
| 13 | 60.04439  | 1740.82781     | 870.91754       | S          | 463.30776      | 232.15752       | 2  |
| 14 | 330.27026 |                |                 | K-TMT6plex | 376.27574      | 188.64151       | 1  |

JM\_HuMarfanPlasma\_TMT1.raw #88571 RT: 246.8085 min  
 FTMS, 1059.0624@hcd30.00, z=+2, Mono m/z=1059.06238 Da, MH+=2117.11748 Da, Match Tol.=0.02 Da

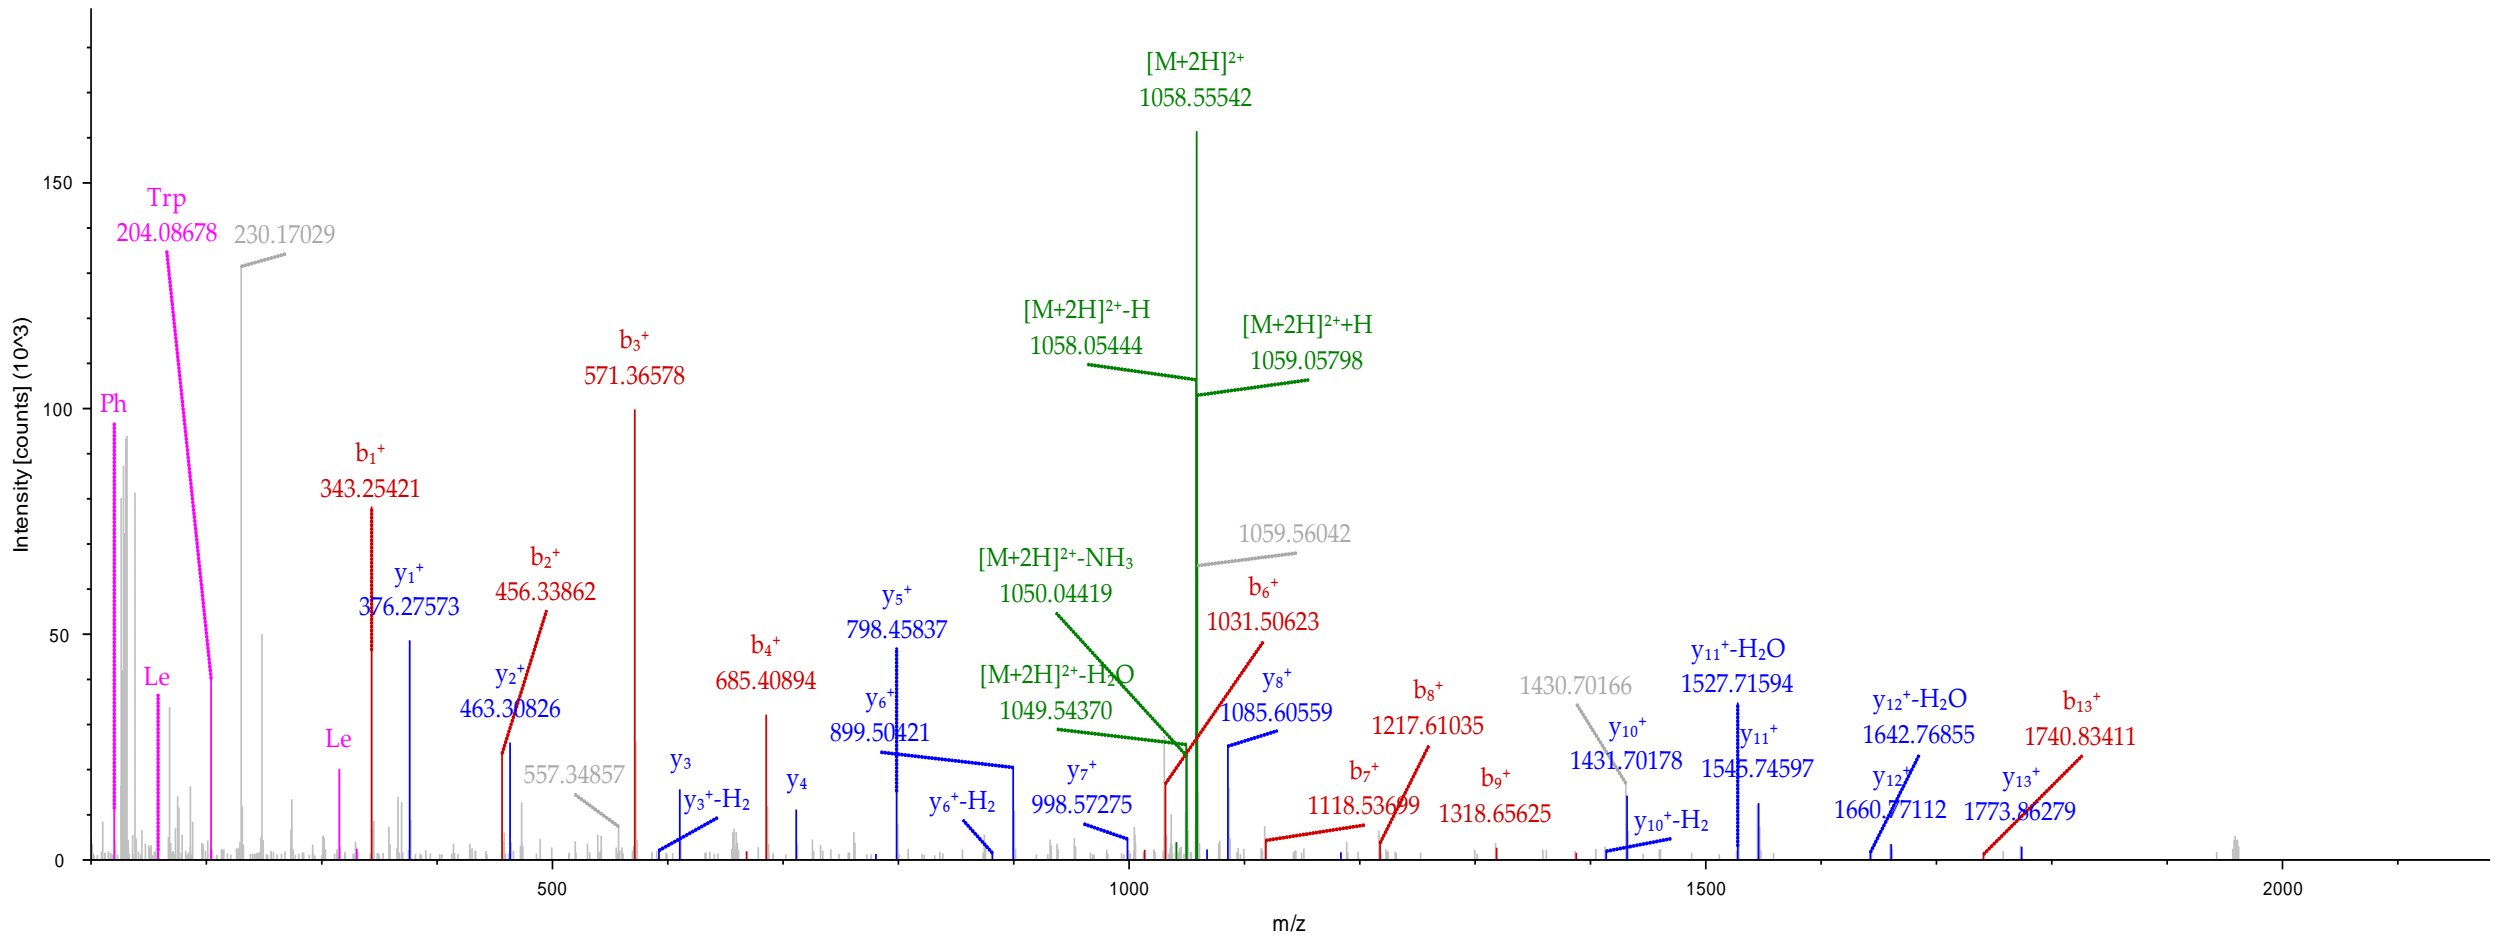

— Pre+H, Precursor, Precursor-H<sub>2</sub>O, Precursor-H<sub>2</sub>O-NH<sub>3</sub>, Precursor-NH<sub>3</sub>, Pre-H  
— y, y-H<sub>2</sub>O, y-NH<sub>3</sub>  
— Immonium  
— b, b-H<sub>2</sub>O, b-NH<sub>3</sub>



| #1 | Immonium  | b <sup>+</sup> | b <sup>2+</sup> | Seq.       | y <sup>+</sup> | y <sup>2+</sup> | #2 |
|----|-----------|----------------|-----------------|------------|----------------|-----------------|----|
| 1  | 331.21789 | 359.21280      | 180.11004       | E-TMT6plex |                |                 | 16 |
| 2  | 101.07094 | 487.27138      | 244.13933       | Q          | 2078.03920     | 1039.52324      | 15 |
| 3  | 86.09643  | 600.35544      | 300.68136       | L          | 1949.98062     | 975.49395       | 14 |
| 4  | 30.03383  | 657.37691      | 329.19209       | G          | 1836.89656     | 918.95192       | 13 |
| 5  | 70.06513  | 754.42967      | 377.71847       | P          | 1779.87509     | 890.44119       | 12 |
| 6  | 72.08078  | 853.49808      | 427.25268       | V          | 1682.82233     | 841.91480       | 11 |
| 7  | 74.06004  | 954.54576      | 477.77652       | T          | 1583.75392     | 792.38060       | 10 |
| 8  | 101.07094 | 1082.60434     | 541.80581       | Q          | 1482.70624     | 741.85676       | 9  |
| 9  | 102.05496 | 1211.64693     | 606.32710       | E          | 1354.64766     | 677.82747       | 8  |
| 10 | 120.08078 | 1358.71535     | 679.86131       | F          | 1225.60507     | 613.30617       | 7  |
| 11 | 204.07675 | 1589.77974     | 795.39351       | W-Nitro    | 1078.53665     | 539.77197       | 6  |
| 12 | 88.03930  | 1704.80668     | 852.90698       | D          | 847.47226      | 424.23977       | 5  |
| 13 | 87.05529  | 1818.84961     | 909.92844       | N          | 732.44532      | 366.72630       | 4  |
| 14 | 86.09643  | 1931.93367     | 966.47047       | L          | 618.40239      | 309.70483       | 3  |
| 15 | 102.05496 | 2060.97627     | 1030.99177      | E          | 505.31833      | 253.16280       | 2  |
| 16 | 330.27026 |                |                 | K-TMT6plex | 376.27574      | 188.64151       | 1  |

JM\_HuMarfanPlasma\_TMT2.raw #62658 RT: 175.9914 min  
 FTMS, 1219.1348@hcd30.00, z=+2, Mono m/z=1219.13477 Da, MH+=2437.26225 Da, Match Tol.=0.02 Da

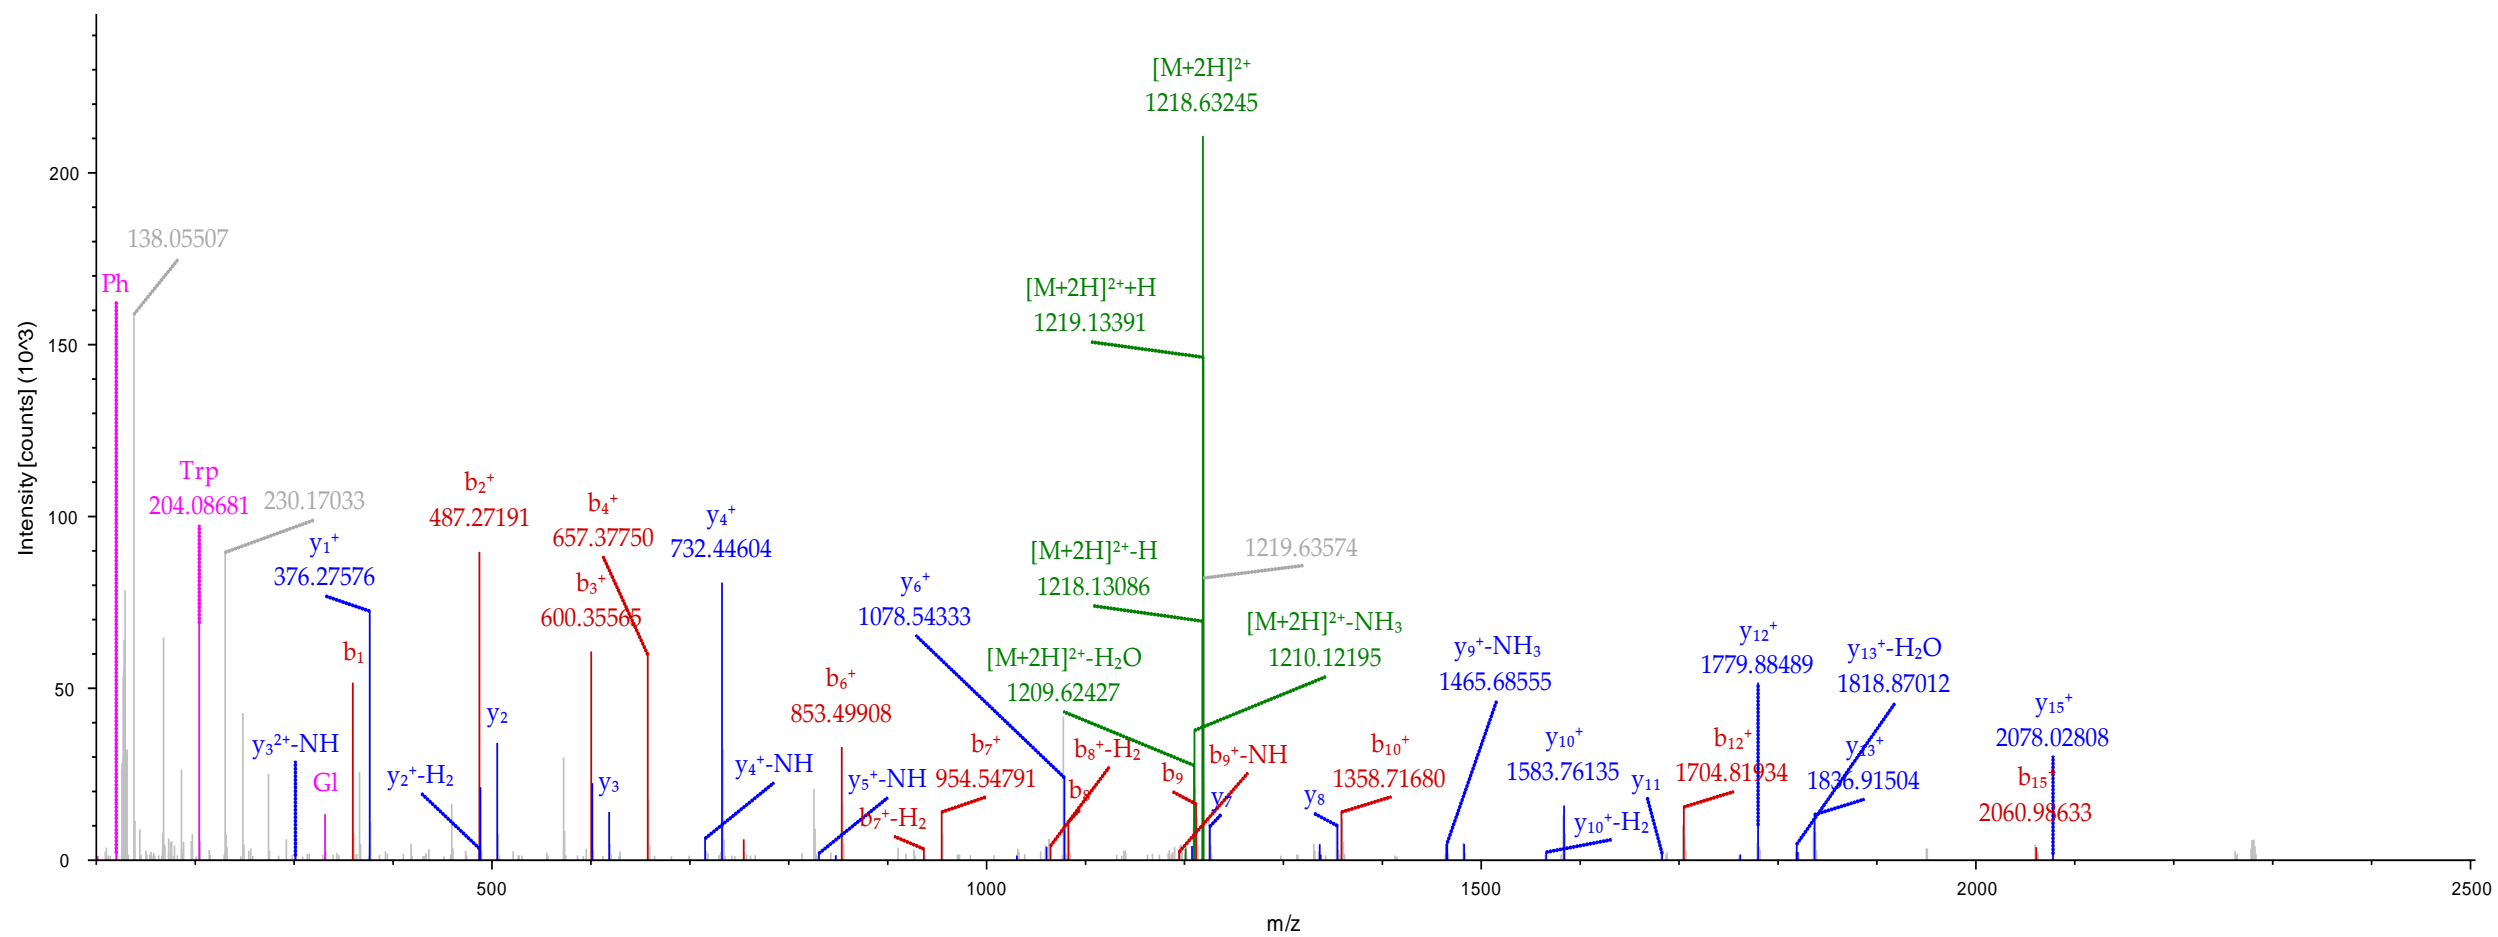

— Pre+H, Precursor, Precursor-H<sub>2</sub>O, Precursor-H<sub>2</sub>O-NH<sub>3</sub>, Precursor-NH<sub>3</sub>, Pre-H  
— y, y-H<sub>2</sub>O, y-NH<sub>3</sub>  
— Immonium  
— b, b-H<sub>2</sub>O, b-NH<sub>3</sub>

| #1 | Immonium  | b <sup>+</sup> | b <sup>2+</sup> | b <sup>3+</sup> | Seq.       | y <sup>+</sup> | y <sup>2+</sup> | y <sup>3+</sup> | #2 |
|----|-----------|----------------|-----------------|-----------------|------------|----------------|-----------------|-----------------|----|
| 1  | 301.24371 | 329.23862      | 165.12295       | 110.41773       | V-TMT6plex |                |                 |                 | 10 |
| 2  | 101.07094 | 457.29720      | 229.15224       | 153.10392       | Q          | 1427.70043     | 714.35385       | 476.57166       | 9  |
| 3  | 70.06513  | 554.34996      | 277.67862       | 185.45484       | P          | 1299.64185     | 650.32456       | 433.88547       | 8  |
| 4  | 181.06077 | 762.39837      | 381.70282       | 254.80431       | Y-Nitro    | 1202.58908     | 601.79818       | 401.53455       | 7  |
| 5  | 86.09643  | 875.48243      | 438.24486       | 292.49900       | L          | 994.54068      | 497.77398       | 332.18508       | 6  |
| 6  | 88.03930  | 990.50938      | 495.75833       | 330.84131       | D          | 881.45661      | 441.23195       | 294.49039       | 5  |
| 7  | 88.03930  | 1105.53632     | 553.27180       | 369.18362       | D          | 766.42967      | 383.71847       | 256.14807       | 4  |
| 8  | 120.08078 | 1252.60473     | 626.80601       | 418.20643       | F          | 651.40273      | 326.20500       | 217.80576       | 3  |
| 9  | 101.07094 | 1380.66331     | 690.83529       | 460.89262       | Q          | 504.33431      | 252.67080       | 168.78296       | 2  |
| 10 | 330.27026 |                |                 |                 | K-TMT6plex | 376.27574      | 188.64151       | 126.09676       | 1  |

Nitro-Tyr immonium ion is detected in MS/MS spectra and added brown colored in the following spectrum

JM\_HuMarfanPlasma\_TMT3\_Fr4.raw #54029 RT: 159.4863 min  
 FTMS, 586.3121@hcd30.00, z=+3, Mono m/z=585.97668 Da, MH+=1755.91550 Da, Match Tol.=0.02 Da

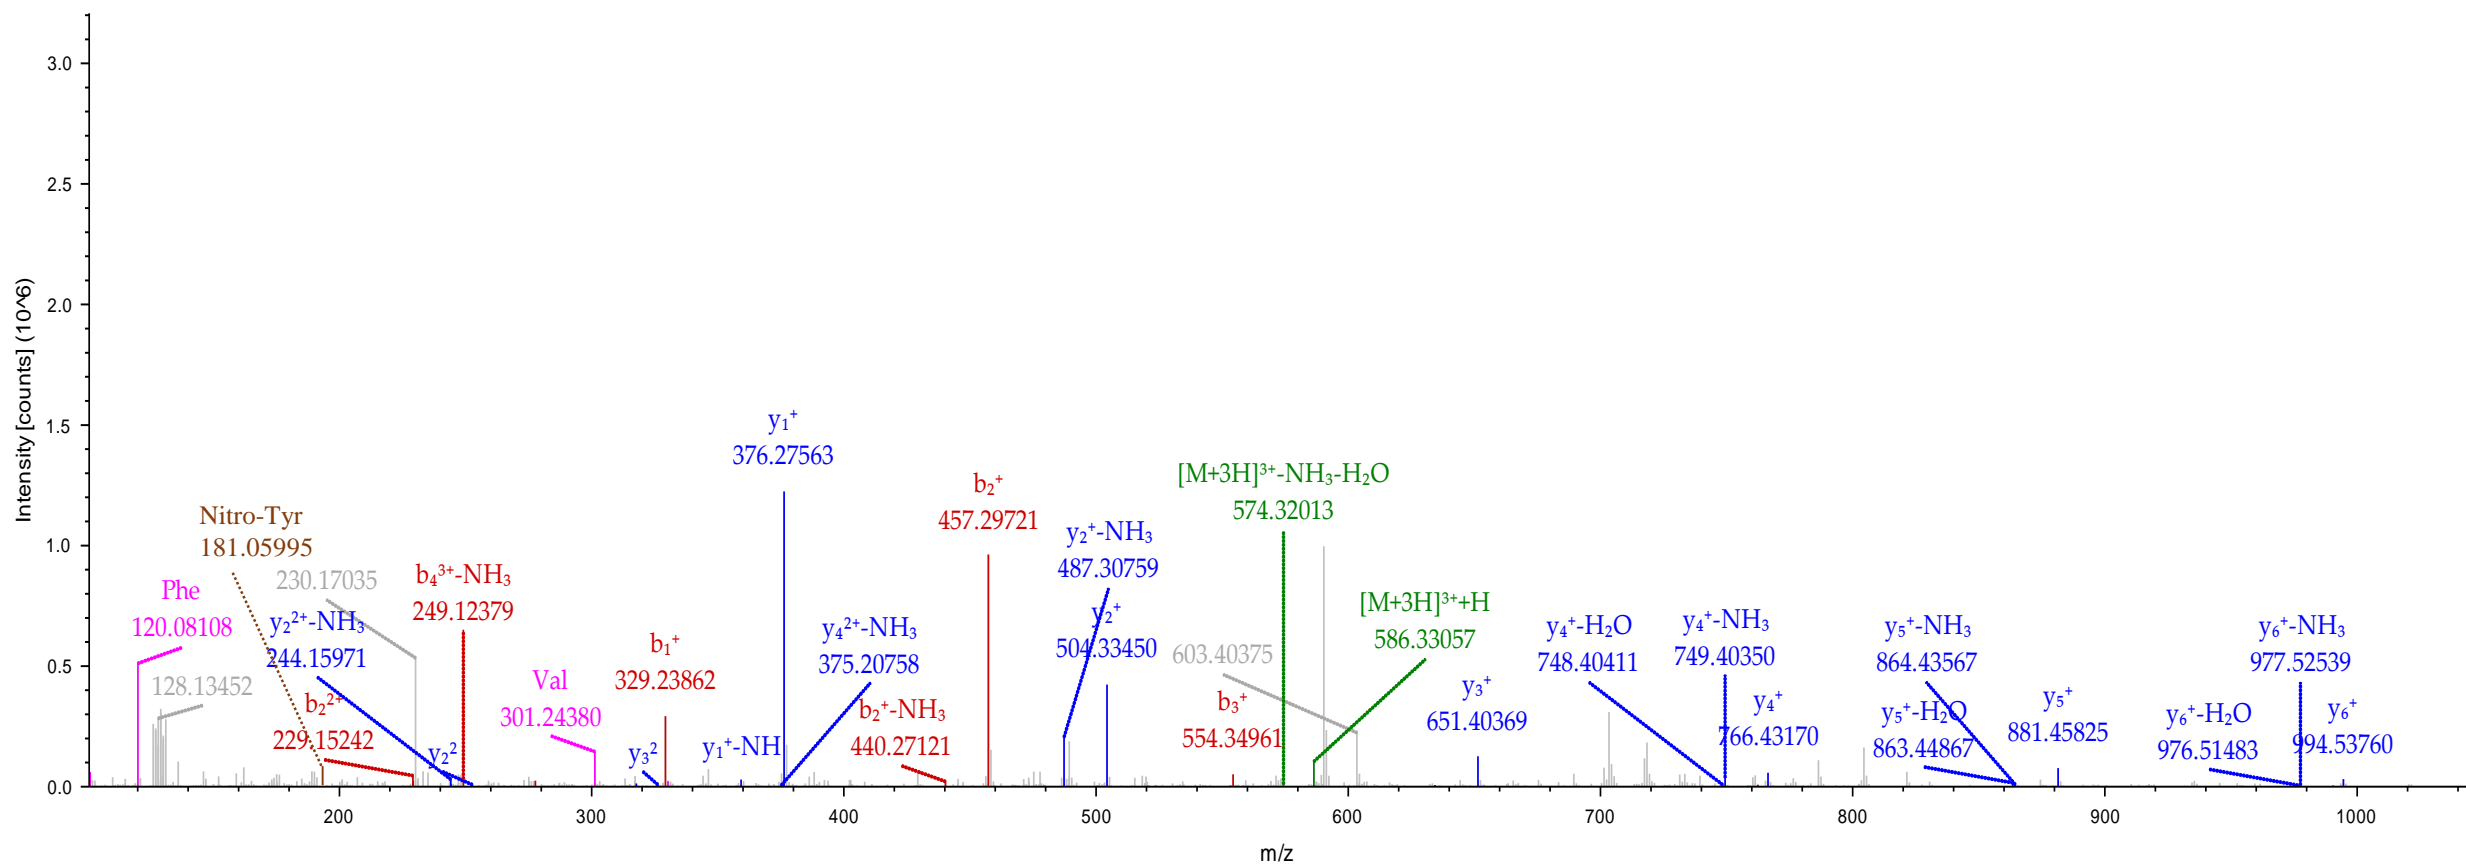

- Pre+H, Precursor, Precursor-H<sub>2</sub>O, Precursor-H<sub>2</sub>O-NH<sub>3</sub>, Precursor-NH<sub>3</sub>, Pre-H
- Immonium
- y, y-H<sub>2</sub>O, y-NH<sub>3</sub>
- b, b-H<sub>2</sub>O, b-NH<sub>3</sub>

| #1 | Immonium  | b <sup>+</sup> | b <sup>2+</sup> | b <sup>3+</sup> | Seq.              | y <sup>+</sup> | y <sup>2+</sup> | y <sup>3+</sup> | #2 |
|----|-----------|----------------|-----------------|-----------------|-------------------|----------------|-----------------|-----------------|----|
| 1  | 289.20732 | 317.20224      | 159.10476       | 106.40560       | S-TMT6plex        |                |                 |                 | 23 |
| 2  | 30.03383  | 374.22370      | 187.61549       | 125.41275       | G                 | 2692.23983     | 1346.62355      | 898.08479       | 22 |
| 3  | 44.04948  | 445.26081      | 223.13405       | 149.09179       | A                 | 2635.21836     | 1318.11282      | 879.07764       | 21 |
| 4  | 30.03383  | 502.28228      | 251.64478       | 168.09894       | G                 | 2564.18125     | 1282.59426      | 855.39860       | 20 |
| 5  | 74.06004  | 603.32996      | 302.16862       | 201.78150       | T                 | 2507.15979     | 1254.08353      | 836.39145       | 19 |
| 6  | 102.05496 | 732.37255      | 366.68991       | 244.79570       | E                 | 2406.11211     | 1203.55969      | 802.70889       | 18 |
| 7  | 88.03930  | 847.39949      | 424.20338       | 283.13802       | D                 | 2277.06951     | 1139.03840      | 759.69469       | 17 |
| 8  | 60.04439  | 934.43152      | 467.71940       | 312.14869       | S                 | 2162.04257     | 1081.52492      | 721.35237       | 16 |
| 9  | 44.04948  | 1005.46863     | 503.23796       | 335.82773       | A                 | 2075.01054     | 1038.00891      | 692.34170       | 15 |
| 10 | 133.04301 | 1165.49928     | 583.25328       | 389.17128       | C-Carbamidomethyl | 2003.97343     | 1002.49035      | 668.66266       | 14 |
| 11 | 86.09643  | 1278.58335     | 639.79531       | 426.86597       | I                 | 1843.94278     | 922.47503       | 615.31911       | 13 |
| 12 | 70.06513  | 1375.63611     | 688.32169       | 459.21689       | P                 | 1730.85872     | 865.93300       | 577.62442       | 12 |
| 13 | 204.07675 | 1606.70050     | 803.85389       | 536.23835       | W-Nitro           | 1633.80595     | 817.40661       | 545.27350       | 11 |
| 14 | 44.04948  | 1677.73762     | 839.37245       | 559.91739       | A                 | 1402.74156     | 701.87442       | 468.25204       | 10 |
| 15 | 136.07569 | 1840.80094     | 920.90411       | 614.27183       | Y                 | 1331.70445     | 666.35586       | 444.57300       | 9  |
| 16 | 136.07569 | 2003.86427     | 1002.43577      | 668.62628       | Y                 | 1168.64112     | 584.82420       | 390.21856       | 8  |
| 17 | 60.04439  | 2090.89630     | 1045.95179      | 697.63695       | S                 | 1005.57779     | 503.29253       | 335.86411       | 7  |
| 18 | 74.06004  | 2191.94398     | 1096.47563      | 731.31951       | T                 | 918.54576      | 459.77652       | 306.85344       | 6  |
| 19 | 72.08078  | 2291.01239     | 1146.00983      | 764.34232       | V                 | 817.49808      | 409.25268       | 273.17088       | 5  |
| 20 | 88.03930  | 2406.03934     | 1203.52331      | 802.68463       | D                 | 718.42967      | 359.71847       | 240.14807       | 4  |
| 21 | 101.07094 | 2534.09791     | 1267.55260      | 845.37082       | Q                 | 603.40273      | 302.20500       | 201.80576       | 3  |
| 22 | 72.08078  | 2633.16633     | 1317.08680      | 878.39363       | V                 | 475.34415      | 238.17571       | 159.11957       | 2  |
| 23 | 330.27026 |                |                 |                 | K-TMT6plex        | 376.27574      | 188.64151       | 126.09676       | 1  |

JM\_HuMarfanPlasma\_TMT5\_Fr4.raw #77959 RT: 233.7142 min  
 FTMS, 1004.8192@hcd30.00, z=+3, Mono m/z=1004.14801 Da, MH+=3010.42948 Da, Match Tol.=0.02 Da

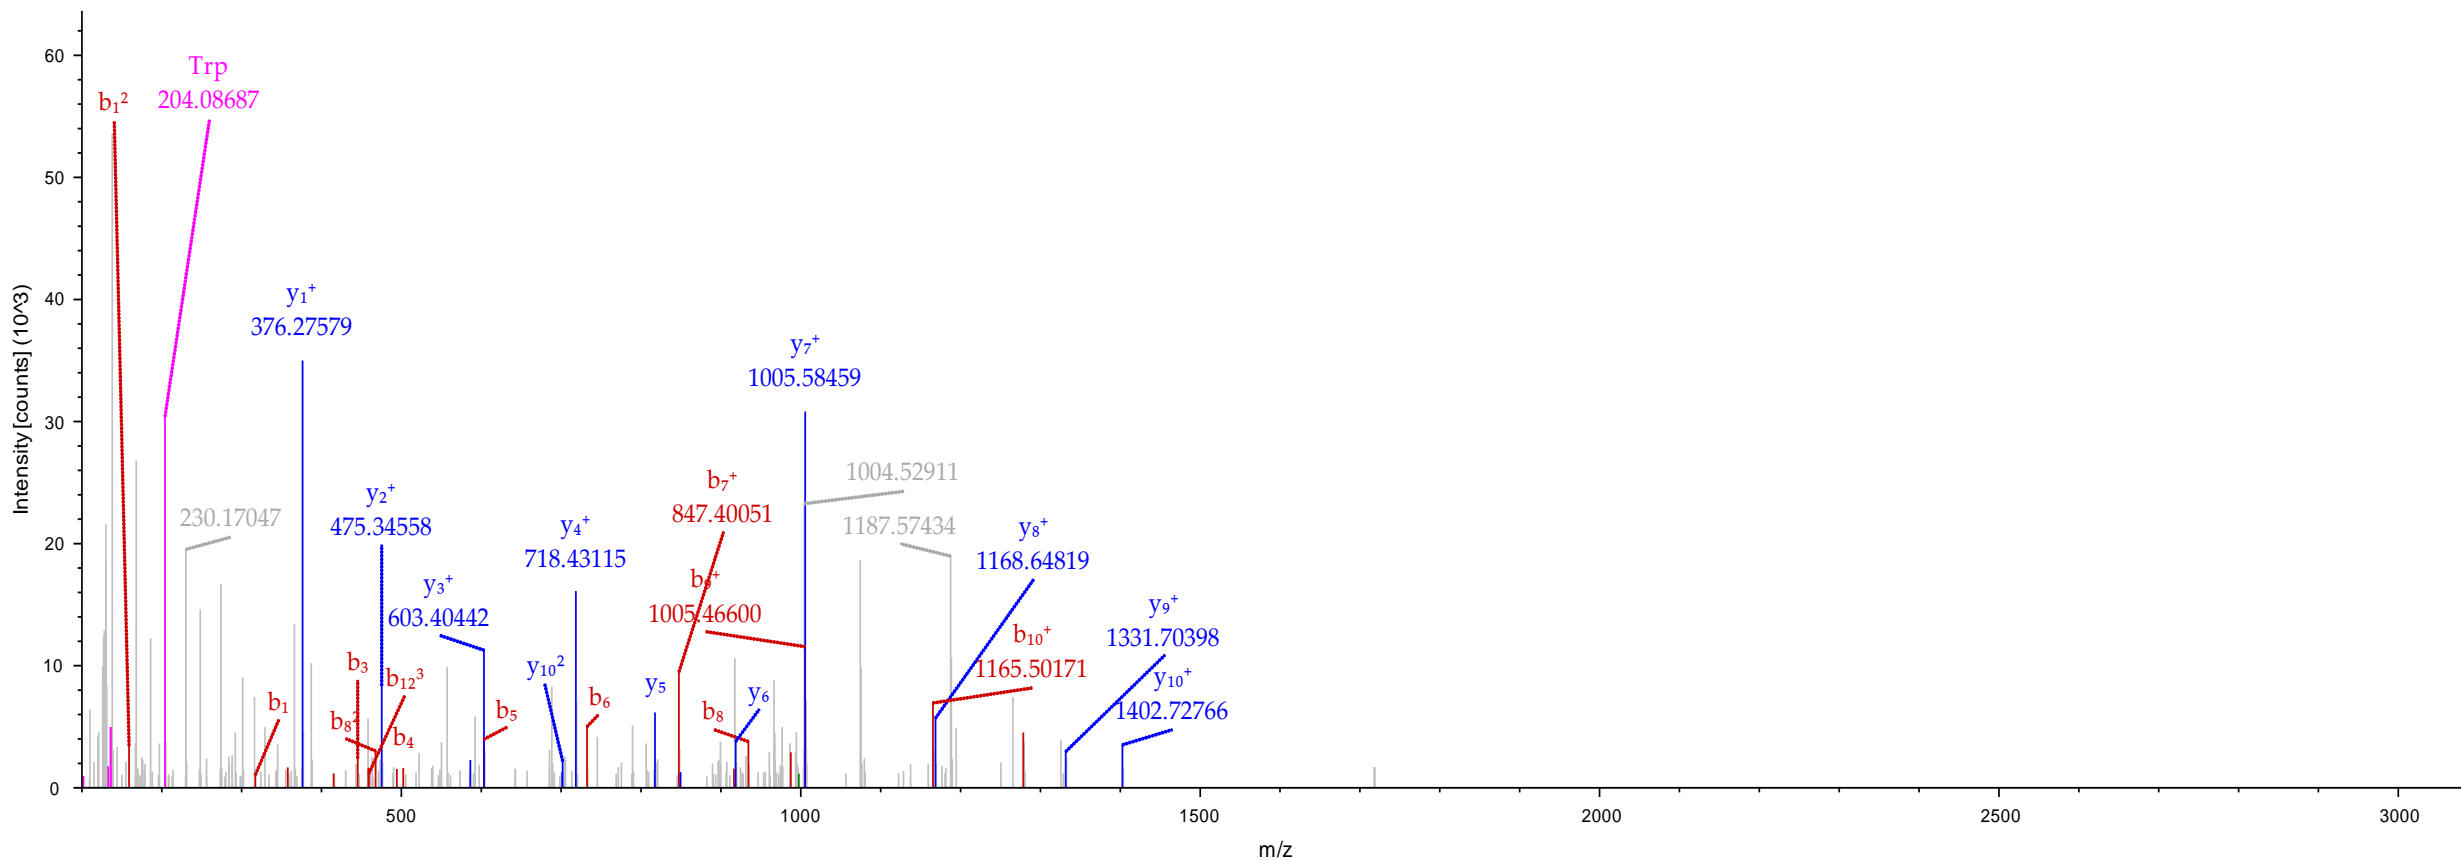

— Pre+H, Precursor, Precursor-H<sub>2</sub>O, Precursor-H<sub>2</sub>O-NH<sub>3</sub>, Precursor-NH<sub>3</sub>, Pre-H  
— y, y-H<sub>2</sub>O, y-NH<sub>3</sub>  
— Immonium  
— b, b-H<sub>2</sub>O, b-NH<sub>3</sub>

| #1 | Immonium  | b <sup>+</sup> | b <sup>2+</sup> | Seq.       | y <sup>+</sup> | y <sup>2+</sup> | #2 |
|----|-----------|----------------|-----------------|------------|----------------|-----------------|----|
| 1  | 349.24371 | 377.23862      | 189.12295       | F-TMT6plex |                |                 | 6  |
| 2  | 181.06077 | 585.28703      | 293.14715       | Y-Nitro    | 1153.73452     | 577.37090       | 5  |
| 3  | 330.27026 | 942.54492      | 471.77610       | K-TMT6plex | 945.68611      | 473.34669       | 4  |
| 4  | 86.09643  | 1055.62899     | 528.31813       | L          | 588.42821      | 294.71775       | 3  |
| 5  | 72.08078  | 1154.69740     | 577.85234       | V          | 475.34415      | 238.17571       | 2  |
| 6  | 330.27026 |                |                 | K-TMT6plex | 376.27574      | 188.64151       | 1  |

JM\_HuMarfanPlasma\_TMT7.raw #56014 RT: 163.1154 min  
 FTMS, 765.4893@hcd30.00, z=+2, Mono m/z=765.49036 Da, MH+=1529.97344 Da, Match Tol.=0.02 Da

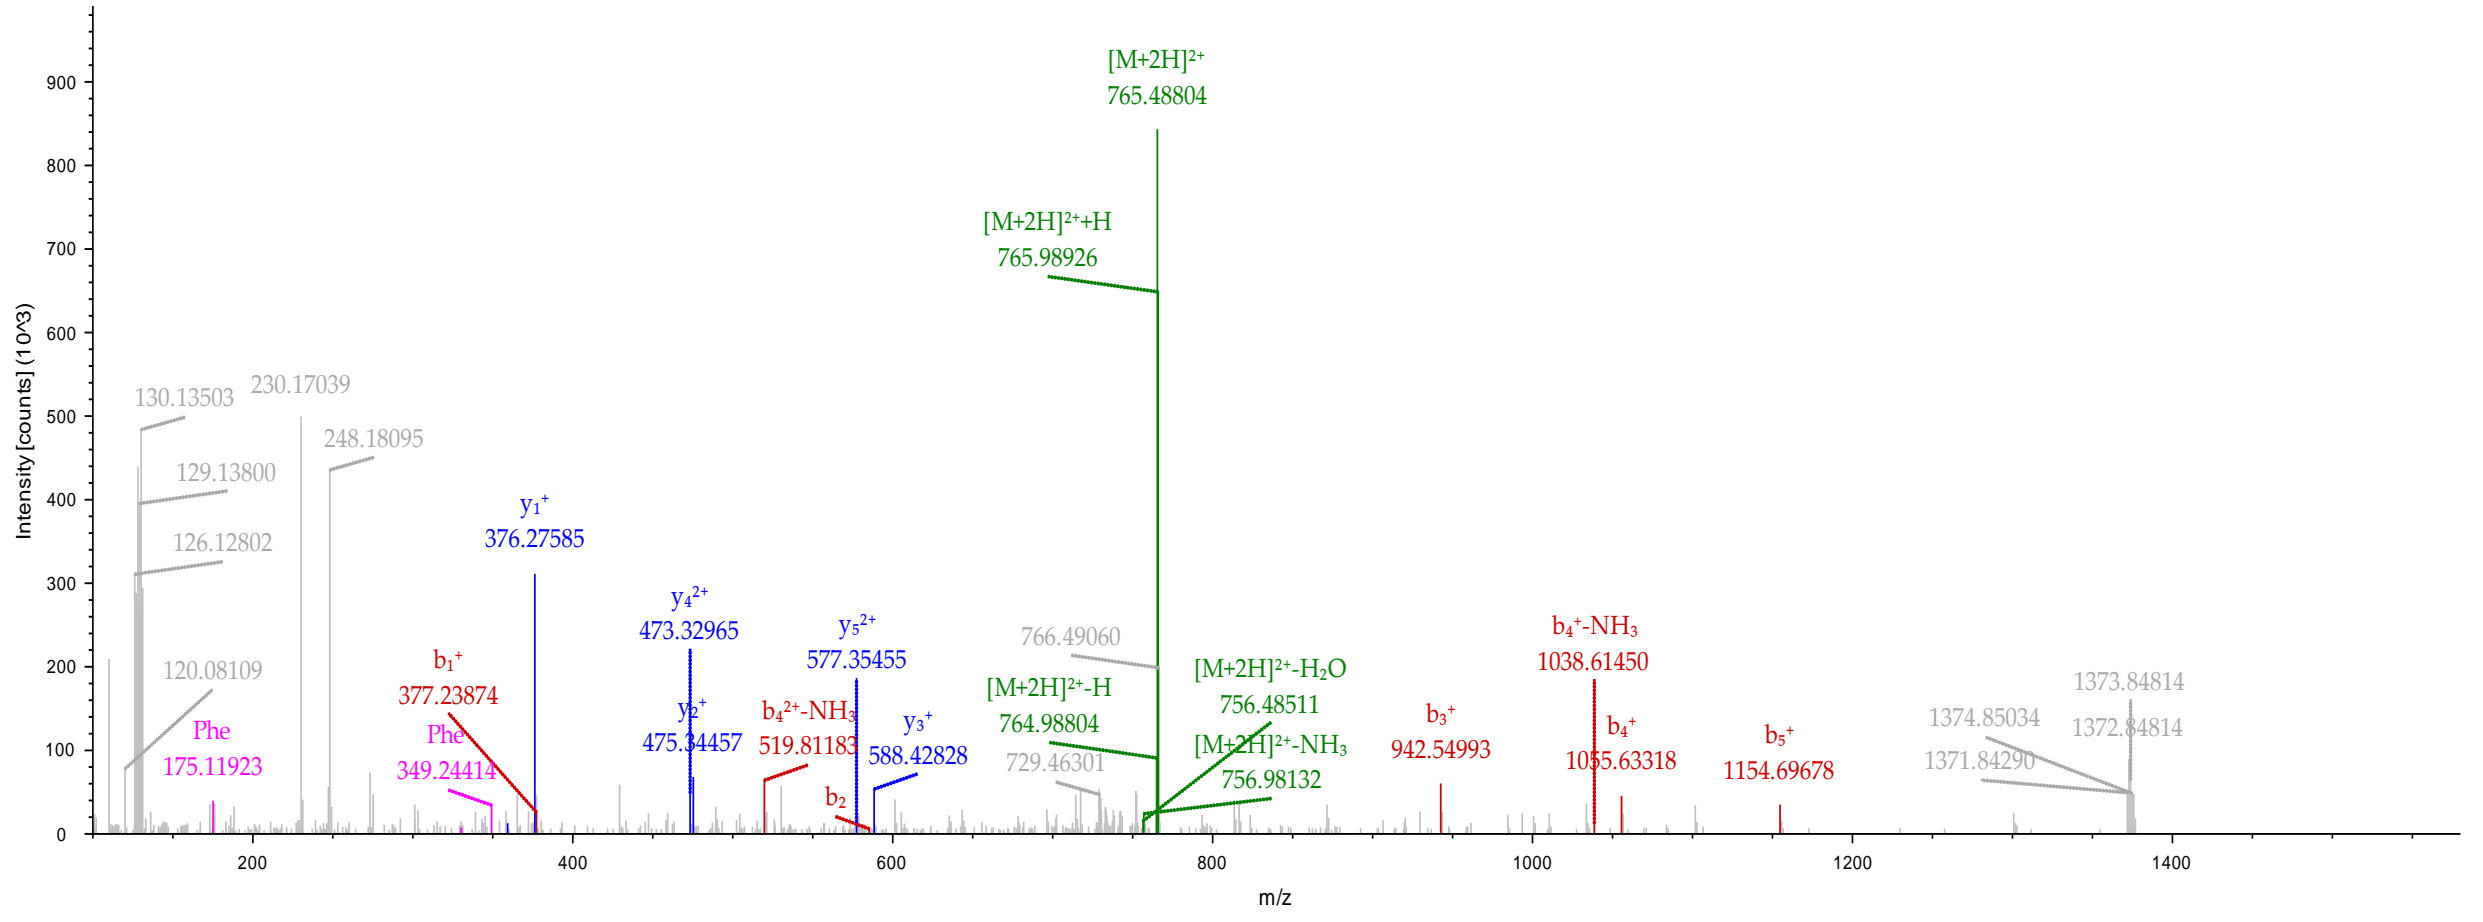

- Pre+H, Precursor, Precursor-H<sub>2</sub>O, Precursor-H<sub>2</sub>O-NH<sub>3</sub>, Precursor-NH<sub>3</sub>, Pre-H
- y, y-H<sub>2</sub>O, y-NH<sub>3</sub>
- Immonium
- b, b-H<sub>2</sub>O, b-NH<sub>3</sub>



| #1 | Immonium  | b <sup>+</sup> | b <sup>2+</sup> | b <sup>3+</sup> | Seq.              | y <sup>+</sup> | y <sup>2+</sup> | y <sup>3+</sup> | #2 |
|----|-----------|----------------|-----------------|-----------------|-------------------|----------------|-----------------|-----------------|----|
| 1  | 273.21241 | 301.20732      | 151.10730       | 101.07396       | A-TMT6plex        |                |                 |                 | 23 |
| 2  | 87.05529  | 415.25025      | 208.12876       | 139.08827       | N                 | 2864.35111     | 1432.67919      | 955.45522       | 22 |
| 3  | 101.07094 | 543.30883      | 272.15805       | 181.77446       | Q                 | 2750.30818     | 1375.65773      | 917.44091       | 21 |
| 4  | 101.07094 | 671.36740      | 336.18734       | 224.46065       | Q                 | 2622.24960     | 1311.62844      | 874.75472       | 20 |
| 5  | 120.08078 | 818.43582      | 409.72155       | 273.48346       | F                 | 2494.19103     | 1247.59915      | 832.06853       | 19 |
| 6  | 86.09643  | 931.51988      | 466.26358       | 311.17815       | L                 | 2347.12261     | 1174.06494      | 783.04572       | 18 |
| 7  | 72.08078  | 1030.58830     | 515.79779       | 344.20095       | V                 | 2234.03855     | 1117.52291      | 745.35103       | 17 |
| 8  | 136.07569 | 1193.65162     | 597.32945       | 398.55539       | Y                 | 2134.97013     | 1067.98871      | 712.32823       | 16 |
| 9  | 133.04301 | 1353.68227     | 677.34477       | 451.89894       | C-Carbamidomethyl | 1971.90681     | 986.45704       | 657.97379       | 15 |
| 10 | 102.05496 | 1482.72487     | 741.86607       | 494.91314       | E                 | 1811.87616     | 906.44172       | 604.63024       | 14 |
| 11 | 86.09643  | 1595.80893     | 798.40810       | 532.60783       | I                 | 1682.83356     | 841.92042       | 561.61604       | 13 |
| 12 | 88.03930  | 1710.83587     | 855.92157       | 570.95014       | D                 | 1569.74950     | 785.37839       | 523.92135       | 12 |
| 13 | 30.03383  | 1767.85734     | 884.43231       | 589.95730       | G                 | 1454.72256     | 727.86492       | 485.57904       | 11 |
| 14 | 60.04439  | 1854.88937     | 927.94832       | 618.96797       | S                 | 1397.70109     | 699.35419       | 466.57188       | 10 |
| 15 | 30.03383  | 1911.91083     | 956.45905       | 637.97513       | G                 | 1310.66907     | 655.83817       | 437.56121       | 9  |
| 16 | 87.05529  | 2025.95376     | 1013.48052      | 675.98944       | N                 | 1253.64760     | 627.32744       | 418.55405       | 8  |
| 17 | 30.03383  | 2082.97522     | 1041.99125      | 694.99659       | G                 | 1139.60467     | 570.30598       | 380.53974       | 7  |
| 18 | 204.07675 | 2314.03961     | 1157.52344      | 772.01805       | W-Nitro           | 1082.58321     | 541.79524       | 361.53259       | 6  |
| 19 | 74.06004  | 2415.08729     | 1208.04728      | 805.70061       | T                 | 851.51882      | 426.26305       | 284.51112       | 5  |
| 20 | 72.08078  | 2514.15570     | 1257.58149      | 838.72342       | V                 | 750.47114      | 375.73921       | 250.82856       | 4  |
| 21 | 120.08078 | 2661.22412     | 1331.11570      | 887.74622       | F                 | 651.40273      | 326.20500       | 217.80576       | 3  |
| 22 | 101.07094 | 2789.28269     | 1395.14499      | 930.43242       | Q                 | 504.33431      | 252.67080       | 168.78296       | 2  |
| 23 | 330.27026 |                |                 |                 | K-TMT6plex        | 376.27574      | 188.64151       | 126.09676       | 1  |

JM\_HuMarfanPlasma\_TMT2.raw #118037 RT: 325.1623 min  
 FTMS, 1056.1995@hcd30.00, z=+3, Mono m/z=1056.1994 Da, MH+=3166.58384 Da, Match Tol.=0.02 Da

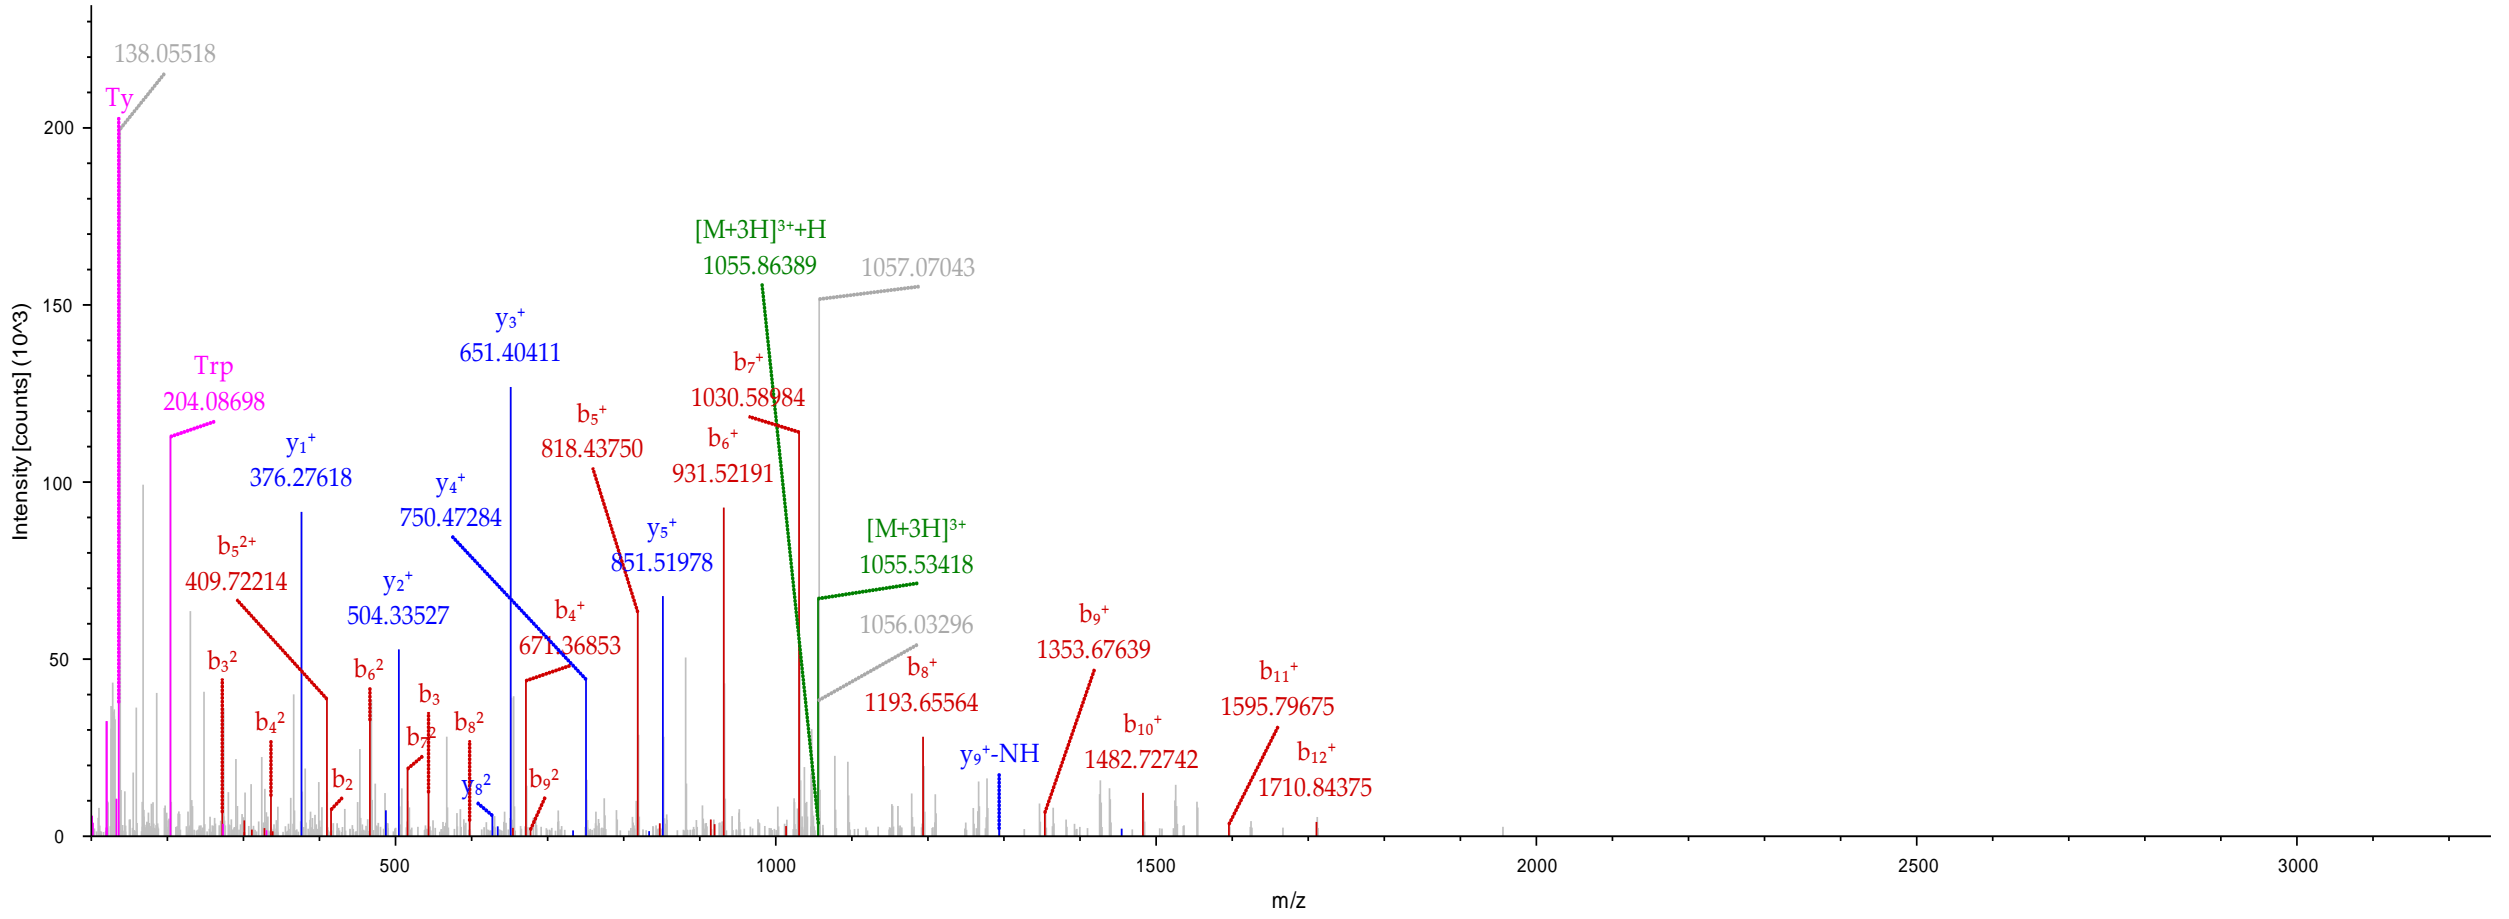

— Pre+H, Precursor, Precursor-H<sub>2</sub>O, Precursor-H<sub>2</sub>O-NH<sub>3</sub>, Precursor-NH<sub>3</sub>, Pre-H  
— y, y-H<sub>2</sub>O, y-NH<sub>3</sub>  
— Immonium  
— b, b-H<sub>2</sub>O, b-NH<sub>3</sub>

| #1 | Immonium  | b <sup>+</sup> | b <sup>2+</sup> | b <sup>3+</sup> | b <sup>4+</sup> | Seq.              | y <sup>+</sup> | y <sup>2+</sup> | y <sup>3+</sup> | y <sup>4+</sup> | #2 |
|----|-----------|----------------|-----------------|-----------------|-----------------|-------------------|----------------|-----------------|-----------------|-----------------|----|
| 1  | 273.21241 | 301.20732      | 151.10730       | 101.07396       | 76.05729        | A-TMT6plex        |                |                 |                 |                 | 23 |
| 2  | 87.05529  | 415.25025      | 208.12876       | 139.08827       | 104.56802       | N                 | 2864.35111     | 1432.67919      | 955.45522       | 716.84323       | 22 |
| 3  | 101.07094 | 543.30883      | 272.15805       | 181.77446       | 136.58266       | Q                 | 2750.30818     | 1375.65773      | 917.44091       | 688.33250       | 21 |
| 4  | 101.07094 | 671.36740      | 336.18734       | 224.46065       | 168.59731       | Q                 | 2622.24960     | 1311.62844      | 874.75472       | 656.31786       | 20 |
| 5  | 120.08078 | 818.43582      | 409.72155       | 273.48346       | 205.36441       | F                 | 2494.19103     | 1247.59915      | 832.06853       | 624.30321       | 19 |
| 6  | 86.09643  | 931.51988      | 466.26358       | 311.17815       | 233.63543       | L                 | 2347.12261     | 1174.06494      | 783.04572       | 587.53611       | 18 |
| 7  | 72.08078  | 1030.58830     | 515.79779       | 344.20095       | 258.40253       | V                 | 2234.03855     | 1117.52291      | 745.35103       | 559.26509       | 17 |
| 8  | 181.06077 | 1238.63670     | 619.82199       | 413.55042       | 310.41463       | Y-Nitro           | 2134.97013     | 1067.98871      | 712.32823       | 534.49799       | 16 |
| 9  | 133.04301 | 1398.66735     | 699.83731       | 466.89397       | 350.42230       | C-Carbamidomethyl | 1926.92173     | 963.96450       | 642.97876       | 482.48589       | 15 |
| 10 | 102.05496 | 1527.70994     | 764.35861       | 509.90817       | 382.68294       | E                 | 1766.89108     | 883.94918       | 589.63521       | 442.47823       | 14 |
| 11 | 86.09643  | 1640.79401     | 820.90064       | 547.60285       | 410.95396       | I                 | 1637.84849     | 819.42788       | 546.62101       | 410.21758       | 13 |
| 12 | 88.03930  | 1755.82095     | 878.41411       | 585.94517       | 439.71070       | D                 | 1524.76442     | 762.88585       | 508.92633       | 381.94656       | 12 |
| 13 | 30.03383  | 1812.84241     | 906.92485       | 604.95232       | 453.96606       | G                 | 1409.73748     | 705.37238       | 470.58401       | 353.18983       | 11 |
| 14 | 60.04439  | 1899.87444     | 950.44086       | 633.96300       | 475.72407       | S                 | 1352.71602     | 676.86165       | 451.57686       | 338.93446       | 10 |
| 15 | 30.03383  | 1956.89591     | 978.95159       | 652.97015       | 489.97943       | G                 | 1265.68399     | 633.34563       | 422.56618       | 317.17645       | 9  |
| 16 | 87.05529  | 2070.93883     | 1035.97306      | 690.98446       | 518.49017       | N                 | 1208.66252     | 604.83490       | 403.55903       | 302.92109       | 8  |
| 17 | 30.03383  | 2127.96030     | 1064.48379      | 709.99162       | 532.74553       | G                 | 1094.61960     | 547.81344       | 365.54472       | 274.41036       | 7  |
| 18 | 159.09167 | 2314.03961     | 1157.52344      | 772.01805       | 579.26536       | W                 | 1037.59813     | 519.30270       | 346.53756       | 260.15499       | 6  |
| 19 | 74.06004  | 2415.08729     | 1208.04728      | 805.70061       | 604.52728       | T                 | 851.51882      | 426.26305       | 284.51112       | 213.63516       | 5  |
| 20 | 72.08078  | 2514.15570     | 1257.58149      | 838.72342       | 629.29438       | V                 | 750.47114      | 375.73921       | 250.82856       | 188.37324       | 4  |
| 21 | 120.08078 | 2661.22412     | 1331.11570      | 887.74622       | 666.06149       | F                 | 651.40273      | 326.20500       | 217.80576       | 163.60614       | 3  |
| 22 | 101.07094 | 2789.28269     | 1395.14499      | 930.43242       | 698.07613       | Q                 | 504.33431      | 252.67080       | 168.78296       | 126.83904       | 2  |
| 23 | 330.27026 |                |                 |                 |                 | K-TMT6plex        | 376.27574      | 188.64151       | 126.09676       | 94.82439        | 1  |

JM\_HuMarfanPlasma\_TMT7.raw #124760 RT: 351.2223 min  
 FTMS, 791.9129@hcd30.00, z=+4, Mono m/z=791.91290 Da, MH+=3164.62978 Da, Match Tol.=0.02 Da

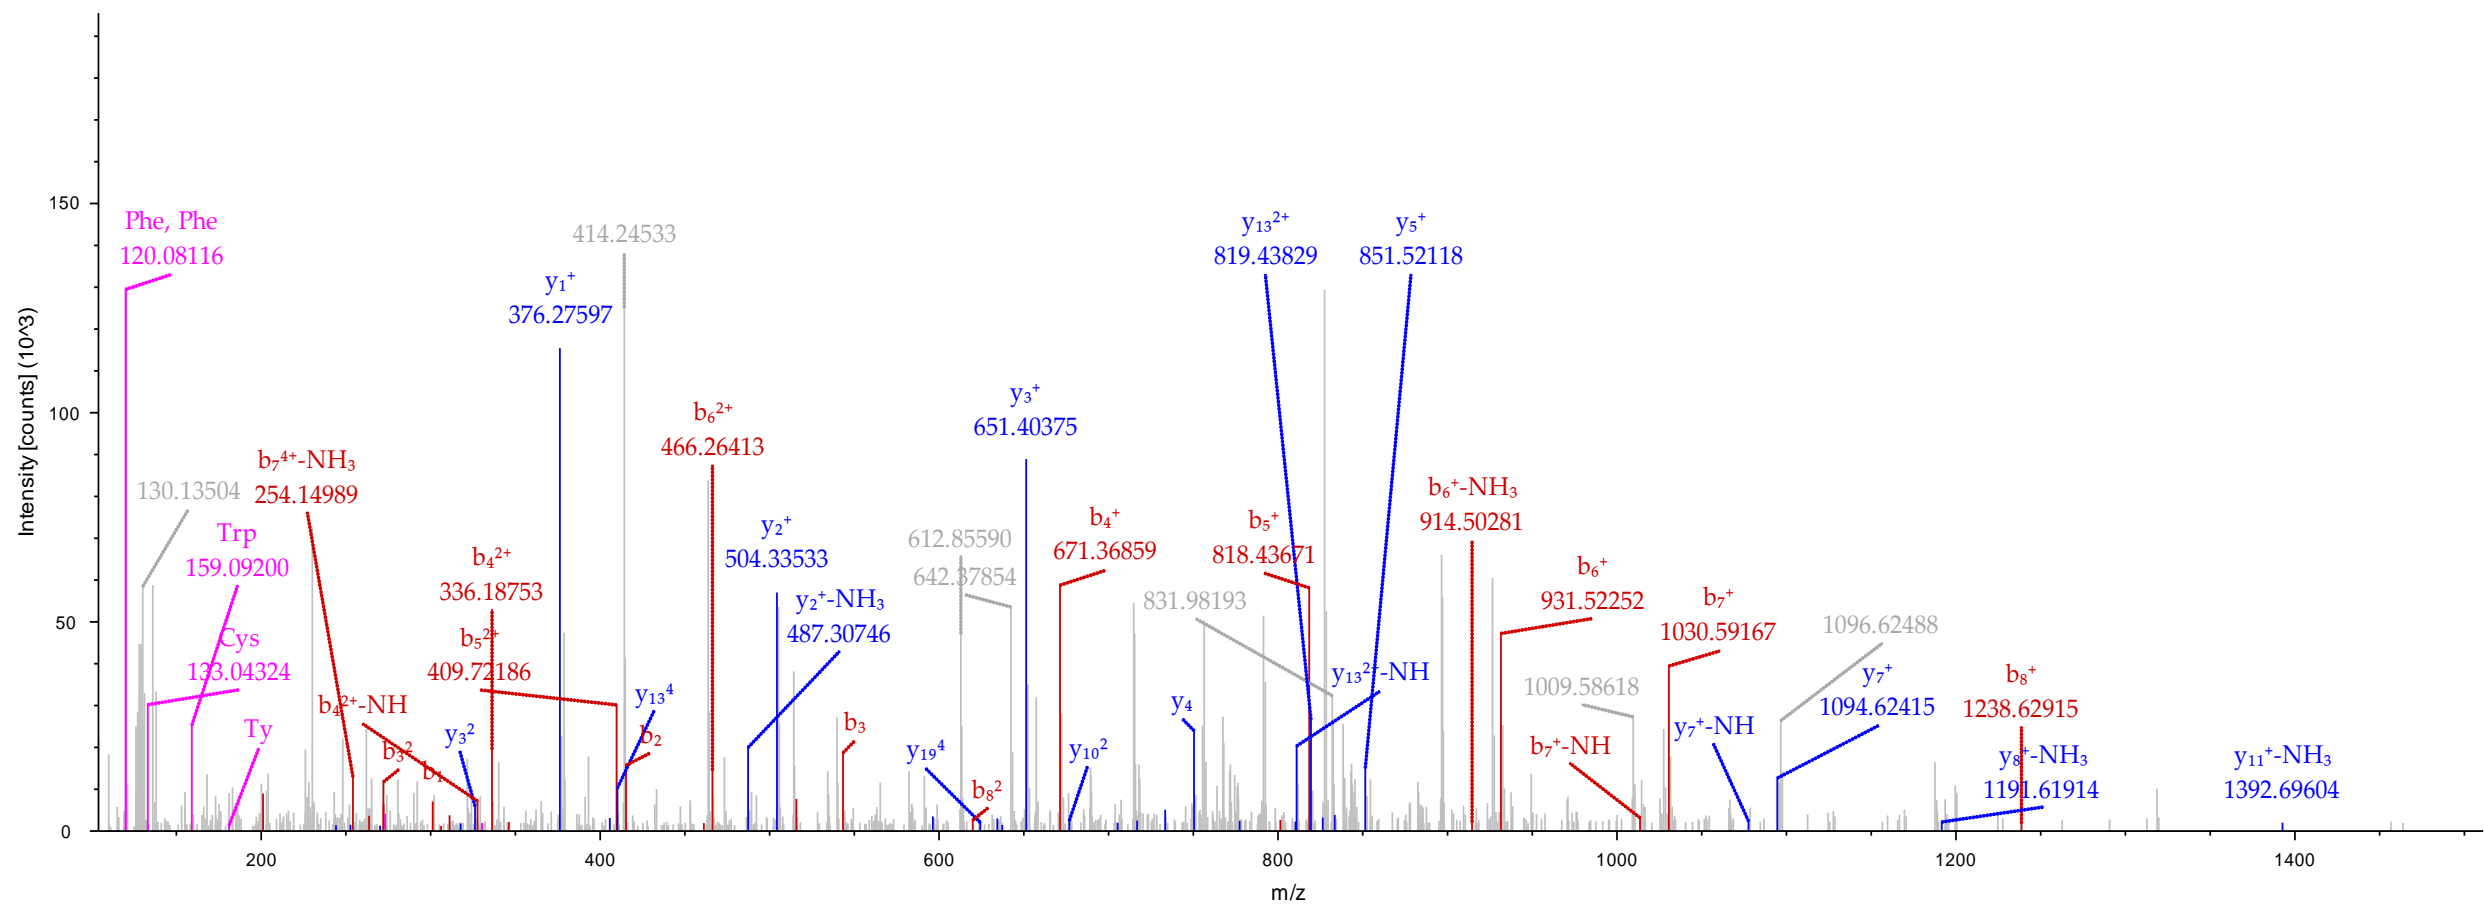

— Pre+H, Precursor, Precursor-H<sub>2</sub>O, Precursor-H<sub>2</sub>O-NH<sub>3</sub>, Precursor-NH<sub>3</sub>, Pre-H — Immonium

— y, y-H<sub>2</sub>O, y-NH<sub>3</sub>

— b, b-H<sub>2</sub>O, b-NH<sub>3</sub>

| #1 | Immonium  | b <sup>+</sup> | b <sup>2+</sup> | Seq.       | y <sup>+</sup> | y <sup>2+</sup> | #2 |
|----|-----------|----------------|-----------------|------------|----------------|-----------------|----|
| 1  | 301.24371 | 329.23862      | 165.12295       | V-TMT6plex |                |                 | 10 |
| 2  | 74.06004  | 430.28630      | 215.64679       | T          | 1378.71641     | 689.86184       | 9  |
| 3  | 60.04439  | 517.31833      | 259.16280       | S          | 1277.66873     | 639.33800       | 8  |
| 4  | 86.09643  | 630.40239      | 315.70483       | I          | 1190.63670     | 595.82199       | 7  |
| 5  | 101.07094 | 758.46097      | 379.73412       | Q          | 1077.55264     | 539.27996       | 6  |
| 6  | 88.03930  | 873.48791      | 437.24760       | D          | 949.49406      | 475.25067       | 5  |
| 7  | 204.07675 | 1104.55230     | 552.77979       | W-Nitro    | 834.46712      | 417.73720       | 4  |
| 8  | 72.08078  | 1203.62072     | 602.31400       | V          | 603.40273      | 302.20500       | 3  |
| 9  | 101.07094 | 1331.67930     | 666.34329       | Q          | 504.33431      | 252.67080       | 2  |
| 10 | 330.27026 |                |                 | K-TMT6plex | 376.27574      | 188.64151       | 1  |

JM\_HuMarfanPlasma\_TMT3\_Fr5.raw #49272 RT: 147.6851 min  
 FTMS, 854.4712@hcd30.00, z=+2, Mono m/z=854.47076 Da, MH+=1707.93425 Da, Match Tol.=0.02 Da

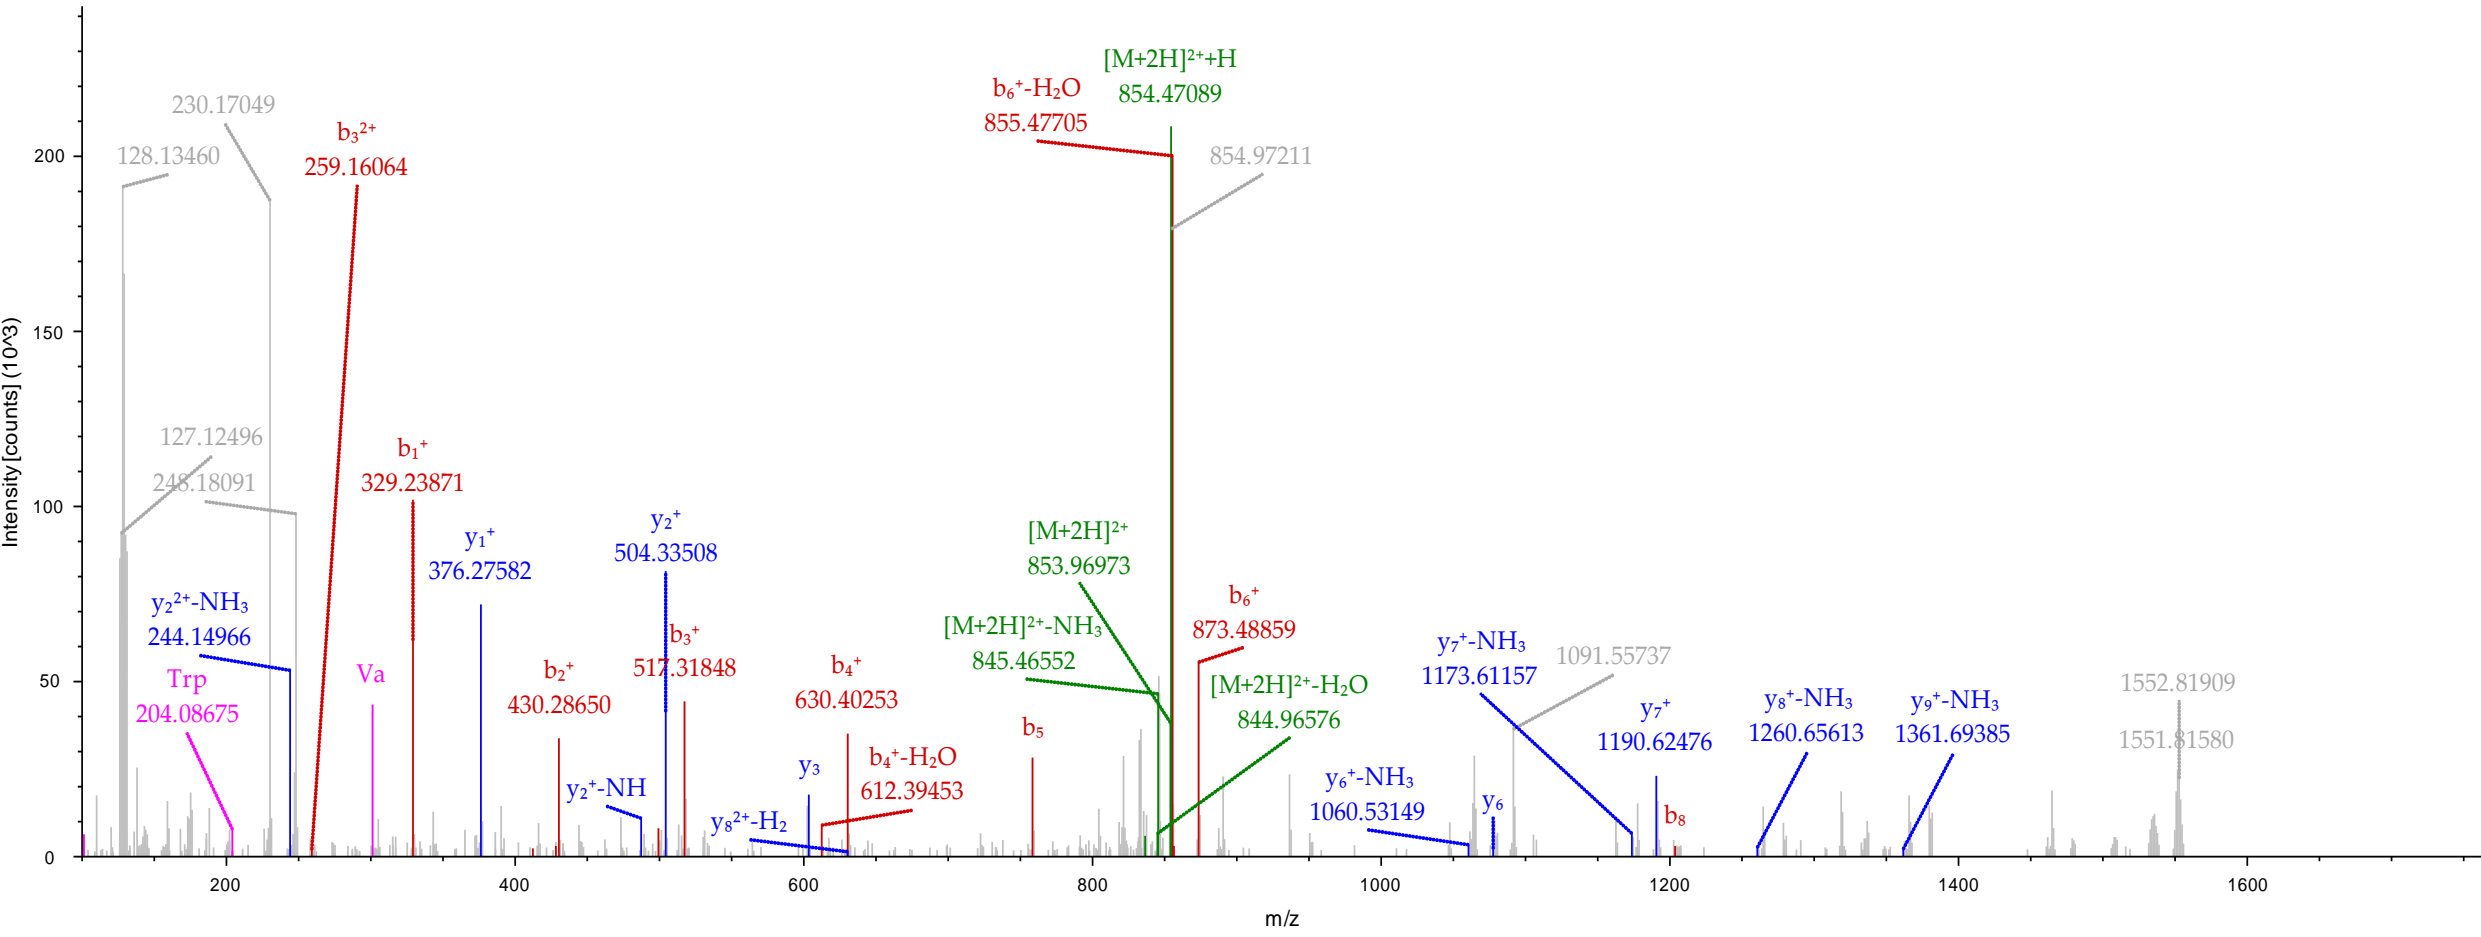

— Pre-H, Precursor, Precursor-H<sub>2</sub>O, Precursor-H<sub>2</sub>O-NH<sub>3</sub>, Precursor-NH<sub>3</sub>, Pre-H  
— y, y-H<sub>2</sub>O, y-NH<sub>3</sub>  
— Immonium  
— b, b-H<sub>2</sub>O, b-NH<sub>3</sub>

| #1 | Immonium  | b <sup>+</sup> | b <sup>2+</sup> | b <sup>3+</sup> | Seq.       | y <sup>+</sup> | y <sup>2+</sup> | y <sup>3+</sup> | #2 |
|----|-----------|----------------|-----------------|-----------------|------------|----------------|-----------------|-----------------|----|
| 1  | 301.24371 | 329.23862      | 165.12295       | 110.41773       | V-TMT6plex |                |                 |                 | 16 |
| 2  | 72.08078  | 428.30704      | 214.65716       | 143.44053       | V          | 1983.08609     | 992.04668       | 661.70021       | 15 |
| 3  | 60.04439  | 515.33906      | 258.17317       | 172.45121       | S          | 1884.01768     | 942.51248       | 628.67741       | 14 |
| 4  | 72.08078  | 614.40748      | 307.70738       | 205.47401       | V          | 1796.98565     | 898.99646       | 599.66673       | 13 |
| 5  | 86.09643  | 727.49154      | 364.24941       | 243.16870       | L          | 1697.91723     | 849.46226       | 566.64393       | 12 |
| 6  | 74.06004  | 828.53922      | 414.77325       | 276.85126       | T          | 1584.83317     | 792.92022       | 528.94924       | 11 |
| 7  | 72.08078  | 927.60763      | 464.30746       | 309.87406       | V          | 1483.78549     | 742.39638       | 495.26668       | 10 |
| 8  | 86.09643  | 1040.69170     | 520.84949       | 347.56875       | L          | 1384.71708     | 692.86218       | 462.24388       | 9  |
| 9  | 110.07127 | 1177.75061     | 589.37894       | 393.25505       | H          | 1271.63301     | 636.32015       | 424.54919       | 8  |
| 10 | 101.07094 | 1305.80919     | 653.40823       | 435.94125       | Q          | 1134.57410     | 567.79069       | 378.86289       | 7  |
| 11 | 88.03930  | 1420.83613     | 710.92170       | 474.28356       | D          | 1006.51553     | 503.76140       | 336.17669       | 6  |
| 12 | 204.07675 | 1651.90052     | 826.45390       | 551.30503       | W-Nitro    | 891.48858      | 446.24793       | 297.83438       | 5  |
| 13 | 86.09643  | 1764.98459     | 882.99593       | 588.99971       | L          | 660.42419      | 330.71573       | 220.81291       | 4  |
| 14 | 87.05529  | 1879.02751     | 940.01739       | 627.01402       | N          | 547.34013      | 274.17370       | 183.11823       | 3  |
| 15 | 30.03383  | 1936.04898     | 968.52813       | 646.02118       | G          | 433.29720      | 217.15224       | 145.10392       | 2  |
| 16 | 330.27026 |                |                 |                 | K-TMT6plex | 376.27574      | 188.64151       | 126.09676       | 1  |





| #1 | Immonium  | b <sup>+</sup> | b <sup>2+</sup> | b <sup>3+</sup> | Seq.       | y <sup>+</sup> | y <sup>2+</sup> | y <sup>3+</sup> | #2 |
|----|-----------|----------------|-----------------|-----------------|------------|----------------|-----------------|-----------------|----|
| 1  | 259.19676 | 287.19167      | 144.09947       | 96.40208        | G-TMT6plex |                |                 |                 | 22 |
| 2  | 120.08078 | 434.26009      | 217.63368       | 145.42488       | F          | 2761.25792     | 1381.13260      | 921.09082       | 21 |
| 3  | 136.07569 | 597.32341      | 299.16535       | 199.77932       | Y          | 2614.18951     | 1307.59839      | 872.06802       | 20 |
| 4  | 70.06513  | 694.37618      | 347.69173       | 232.13024       | P          | 2451.12618     | 1226.06673      | 817.71358       | 19 |
| 5  | 60.04439  | 781.40821      | 391.20774       | 261.14092       | S          | 2354.07341     | 1177.54034      | 785.36266       | 18 |
| 6  | 88.03930  | 896.43515      | 448.72121       | 299.48323       | D          | 2267.04138     | 1134.02433      | 756.35198       | 17 |
| 7  | 86.09643  | 1009.51921     | 505.26325       | 337.17792       | I          | 2152.01444     | 1076.51086      | 718.00966       | 16 |
| 8  | 44.04948  | 1080.55633     | 540.78180       | 360.85696       | A          | 2038.93038     | 1019.96883      | 680.31498       | 15 |
| 9  | 72.08078  | 1179.62474     | 590.31601       | 393.87976       | V          | 1967.89326     | 984.45027       | 656.63594       | 14 |
| 10 | 102.05496 | 1308.66733     | 654.83731       | 436.89396       | E          | 1868.82485     | 934.91606       | 623.61313       | 13 |
| 11 | 204.07675 | 1539.73173     | 770.36950       | 513.91543       | W-Nitro    | 1739.78226     | 870.39477       | 580.59894       | 12 |
| 12 | 102.05496 | 1668.77432     | 834.89080       | 556.92962       | E          | 1508.71787     | 754.86257       | 503.57747       | 11 |
| 13 | 60.04439  | 1755.80635     | 878.40681       | 585.94030       | S          | 1379.67527     | 690.34127       | 460.56328       | 10 |
| 14 | 87.05529  | 1869.84927     | 935.42828       | 623.95461       | N          | 1292.64324     | 646.82526       | 431.55260       | 9  |
| 15 | 30.03383  | 1926.87074     | 963.93901       | 642.96176       | G          | 1178.60032     | 589.80380       | 393.53829       | 8  |
| 16 | 101.07094 | 2054.92932     | 1027.96830      | 685.64796       | Q          | 1121.57885     | 561.29307       | 374.53114       | 7  |
| 17 | 70.06513  | 2151.98208     | 1076.49468      | 717.99888       | P          | 993.52028      | 497.26378       | 331.84494       | 6  |
| 18 | 102.05496 | 2281.02467     | 1141.01597      | 761.01308       | E          | 896.46751      | 448.73739       | 299.49402       | 5  |
| 19 | 87.05529  | 2395.06760     | 1198.03744      | 799.02738       | N          | 767.42492      | 384.21610       | 256.47982       | 4  |
| 20 | 87.05529  | 2509.11053     | 1255.05890      | 837.04169       | N          | 653.38199      | 327.19463       | 218.46552       | 3  |
| 21 | 136.07569 | 2672.17386     | 1336.59057      | 891.39614       | Y          | 539.33906      | 270.17317       | 180.45121       | 2  |
| 22 | 330.27026 |                |                 |                 | K-TMT6plex | 376.27574      | 188.64151       | 126.09676       | 1  |

JM\_HuMarfanPlasma\_TMT1.raw #93815 RT: 260.7509 min  
 FTMS, 1017.2054@hcd30.00, z=+3, Mono m/z=1017.20538 Da, MH+=3049.60160 Da, Match Tol.=0.02 Da

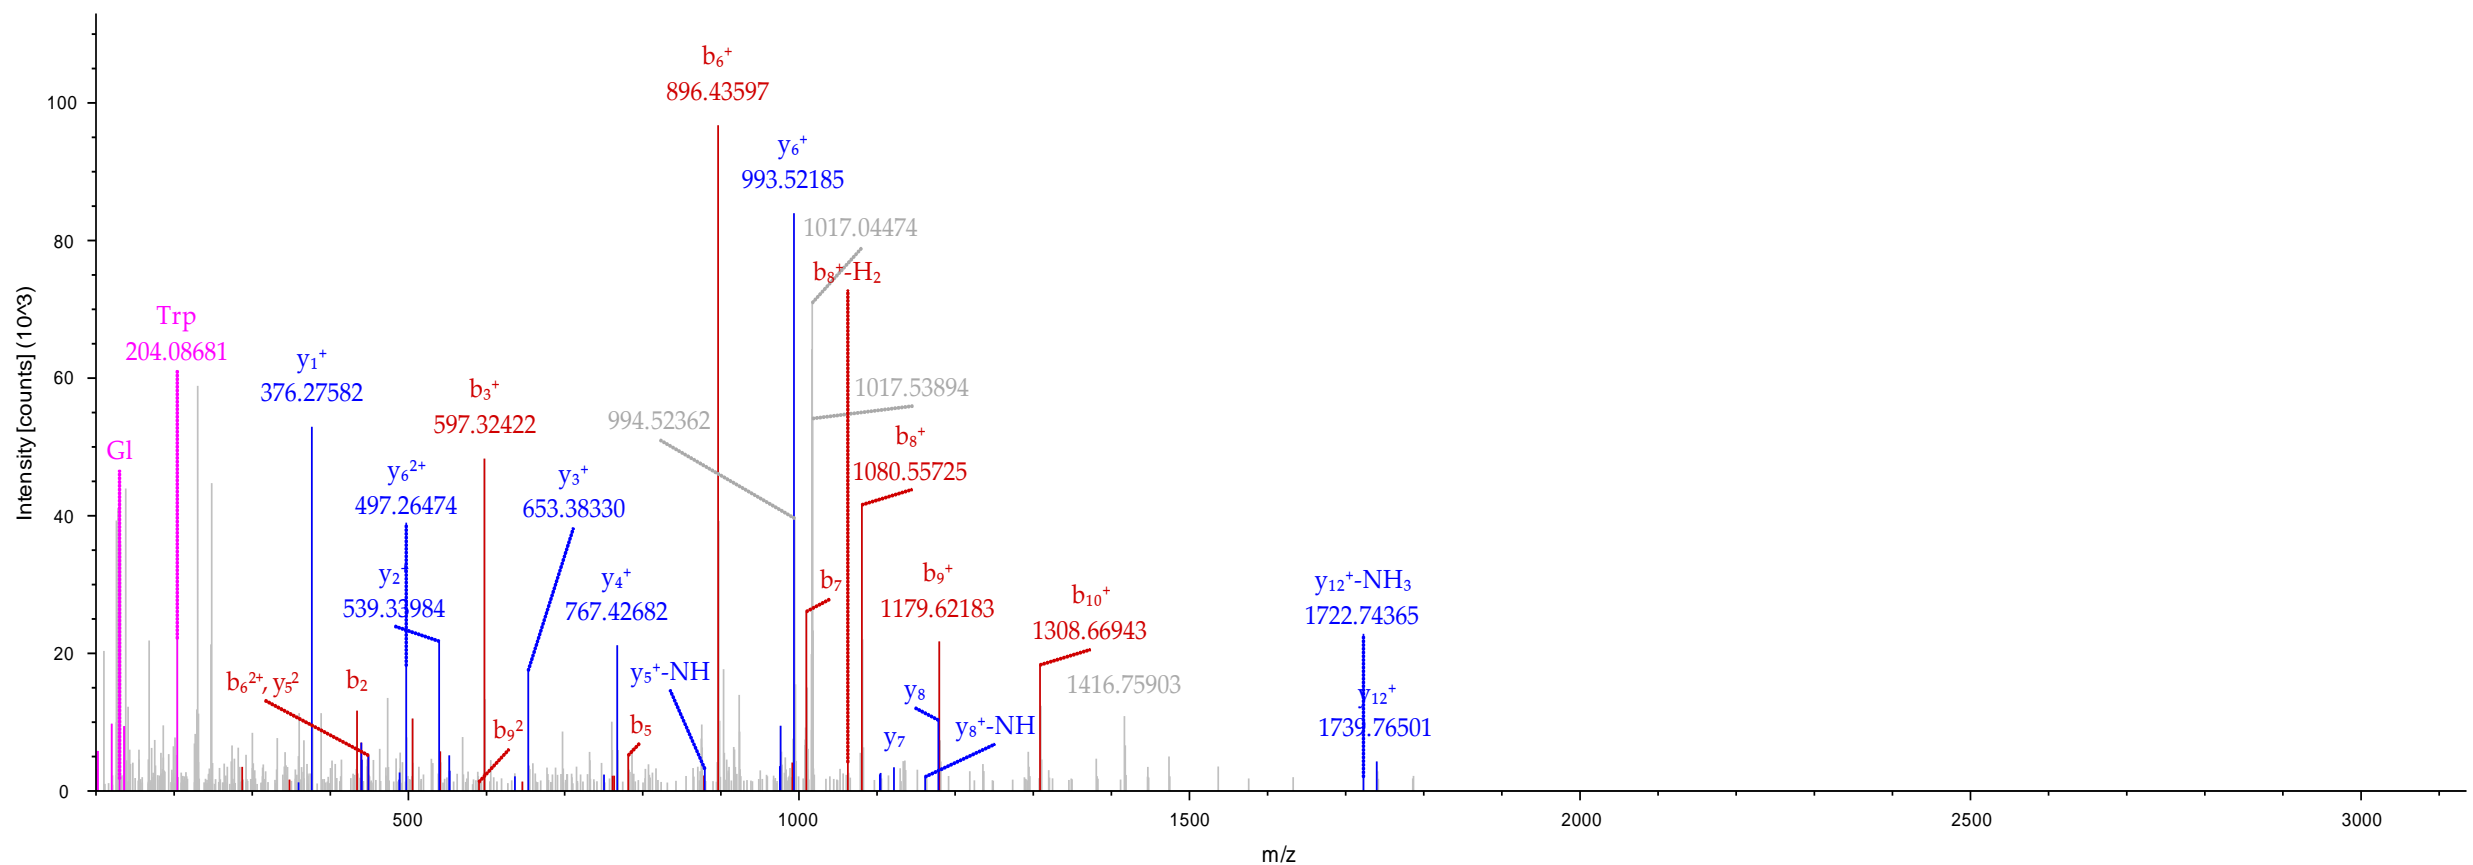

— Pre+H, Precursor, Precursor-H<sub>2</sub>O, Precursor-H<sub>2</sub>O-NH<sub>3</sub>, Precursor-NH<sub>3</sub>, Pre-H  
— y, y-H<sub>2</sub>O, y-NH<sub>3</sub>  
— Immonium  
— b, b-H<sub>2</sub>O, b-NH<sub>3</sub>

| #1 | Immonium  | b <sup>+</sup> | b <sup>2+</sup> | b <sup>3+</sup> | Seq.       | y <sup>+</sup> | y <sup>2+</sup> | y <sup>3+</sup> | #2 |
|----|-----------|----------------|-----------------|-----------------|------------|----------------|-----------------|-----------------|----|
| 1  | 303.22297 | 331.21789      | 166.11258       | 111.07748       | T-TMT6plex |                |                 |                 | 17 |
| 2  | 74.06004  | 432.26557      | 216.63642       | 144.76004       | T          | 2047.02215     | 1024.01471      | 683.01224       | 16 |
| 3  | 70.06513  | 529.31833      | 265.16280       | 177.11096       | P          | 1945.97447     | 973.49088       | 649.32968       | 15 |
| 4  | 70.06513  | 626.37109      | 313.68918       | 209.46188       | P          | 1848.92171     | 924.96449       | 616.97875       | 14 |
| 5  | 72.08078  | 725.43951      | 363.22339       | 242.48469       | V          | 1751.86895     | 876.43811       | 584.62783       | 13 |
| 6  | 86.09643  | 838.52357      | 419.76542       | 280.17937       | L          | 1652.80053     | 826.90390       | 551.60503       | 12 |
| 7  | 88.03930  | 953.55051      | 477.27890       | 318.52169       | D          | 1539.71647     | 770.36187       | 513.91034       | 11 |
| 8  | 60.04439  | 1040.58254     | 520.79491       | 347.53237       | S          | 1424.68953     | 712.84840       | 475.56803       | 10 |
| 9  | 88.03930  | 1155.60949     | 578.30838       | 385.87468       | D          | 1337.65750     | 669.33239       | 446.55735       | 9  |
| 10 | 30.03383  | 1212.63095     | 606.81911       | 404.88183       | G          | 1222.63055     | 611.81892       | 408.21504       | 8  |
| 11 | 60.04439  | 1299.66298     | 650.33513       | 433.89251       | S          | 1165.60909     | 583.30818       | 389.20788       | 7  |
| 12 | 120.08078 | 1446.73139     | 723.86933       | 482.91531       | F          | 1078.57706     | 539.79217       | 360.19721       | 6  |
| 13 | 120.08078 | 1593.79980     | 797.40354       | 531.93812       | F          | 931.50865      | 466.25796       | 311.17440       | 5  |
| 14 | 86.09643  | 1706.88387     | 853.94557       | 569.63281       | L          | 784.44024      | 392.72376       | 262.15160       | 4  |
| 15 | 181.06077 | 1914.93228     | 957.96978       | 638.98228       | Y-Nitro    | 671.35617      | 336.18172       | 224.45691       | 3  |
| 16 | 60.04439  | 2001.96430     | 1001.48579      | 667.99295       | S          | 463.30776      | 232.15752       | 155.10744       | 2  |
| 17 | 330.27026 |                |                 |                 | K-TMT6plex | 376.27574      | 188.64151       | 126.09676       | 1  |

JM\_HuMarfanPlasma\_TMT1.raw #115789 RT: 320.2076 min  
 FTMS, 793.0867@hcd30.00, z=+3, Mono m/z=793.16888 Da, MH+=2377.49210 Da, Match Tol.=0.02 Da

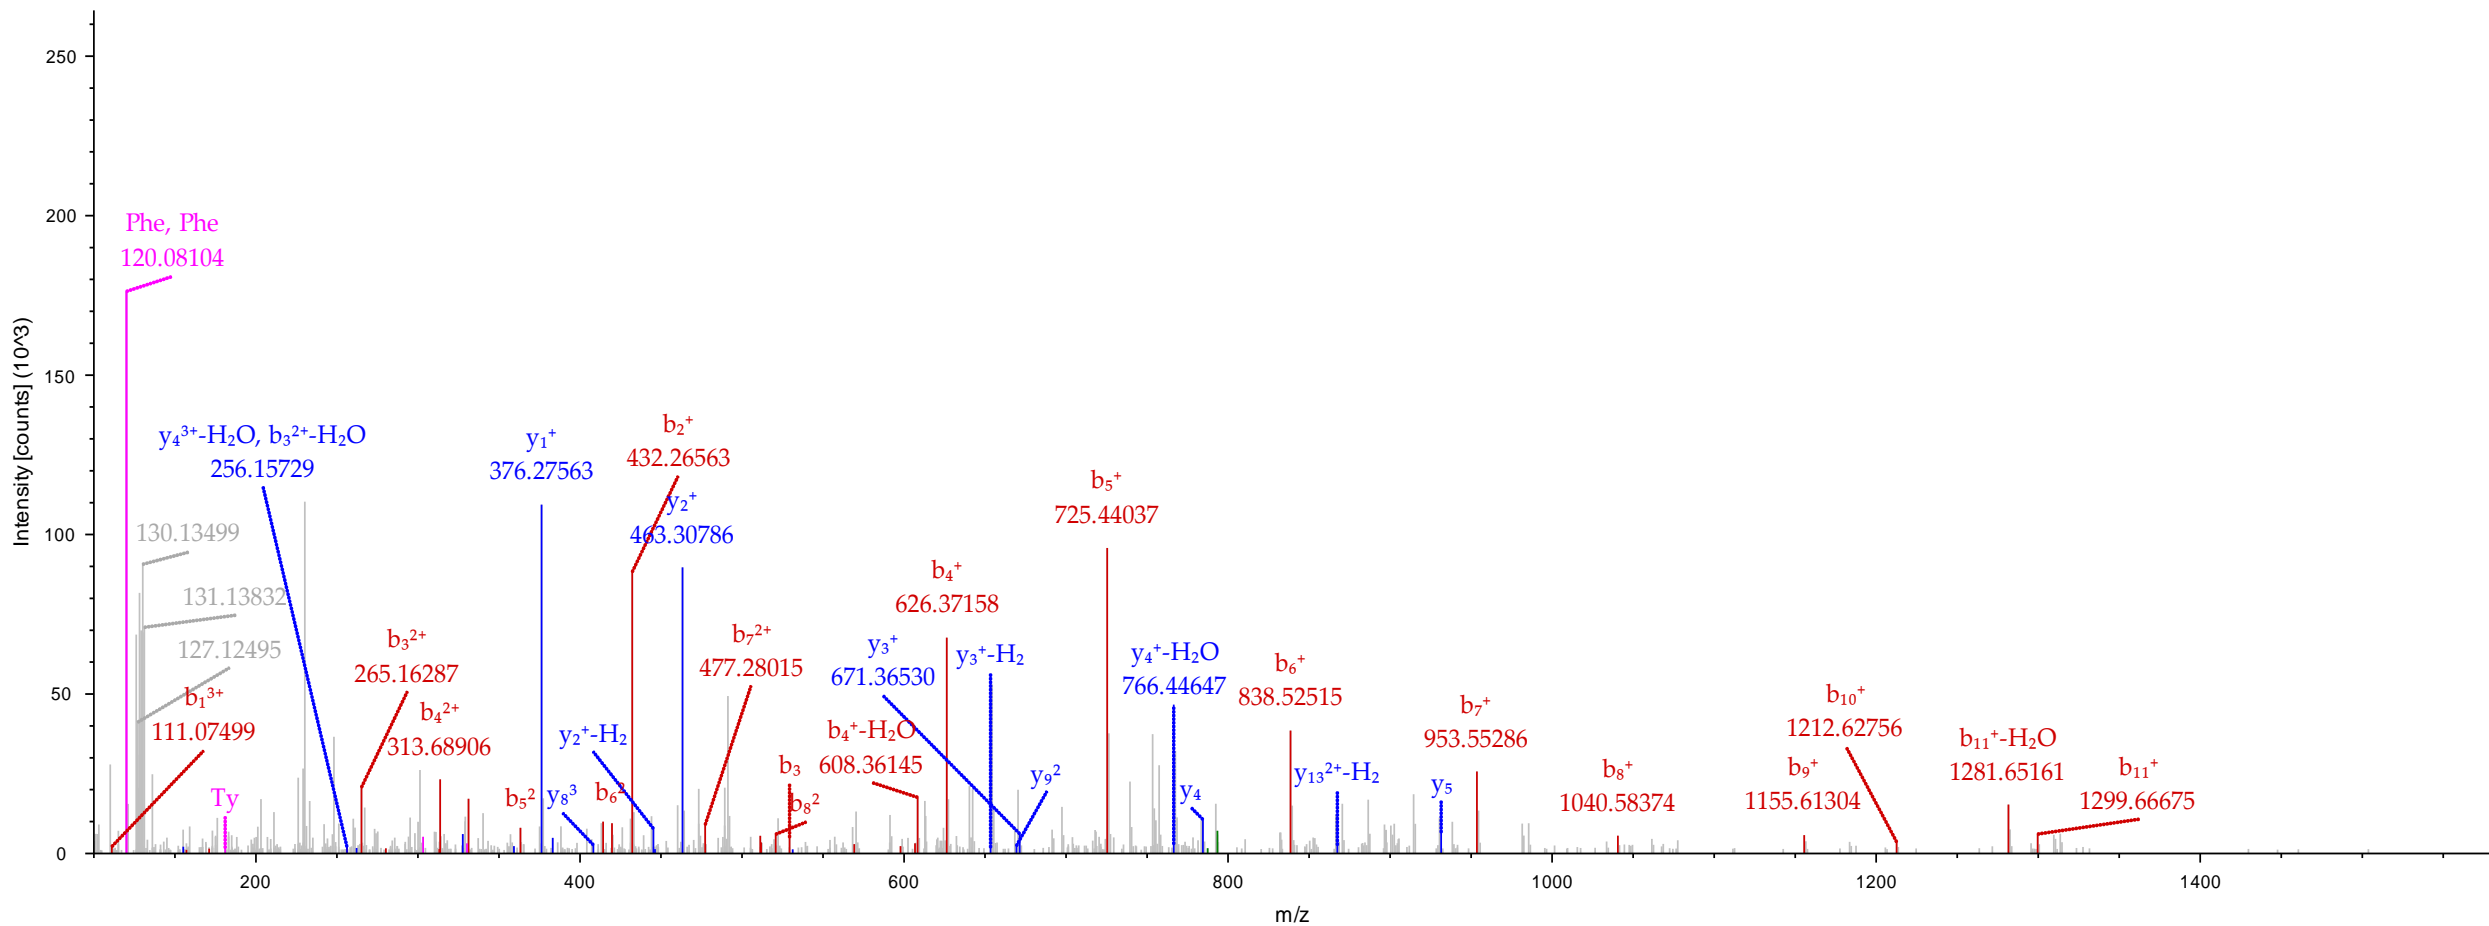

— Pre+H, Precursor, Precursor-H<sub>2</sub>O, Precursor-H<sub>2</sub>O-NH<sub>3</sub>, Precursor-NH<sub>3</sub>, Pre-H  
— y, y-H<sub>2</sub>O, y-NH<sub>3</sub>  
— Immonium  
— b, b-H<sub>2</sub>O, b-NH<sub>3</sub>

| #1 | Immonium                  | b <sup>+</sup>             | b <sup>2+</sup>            | b <sup>3+</sup>           | b <sup>4+</sup>            | b <sup>5+</sup>           | Seq.         | y <sup>+</sup>            | y <sup>2+</sup>           | y <sup>3+</sup>            | y <sup>4+</sup>            | y <sup>5+</sup>           | #2 |
|----|---------------------------|----------------------------|----------------------------|---------------------------|----------------------------|---------------------------|--------------|---------------------------|---------------------------|----------------------------|----------------------------|---------------------------|----|
| 1  | <a href="#">303.22297</a> | <a href="#">331.21789</a>  | 166.11258                  | <a href="#">111.07748</a> | 83.55993                   | 67.04940                  | T-TMT6plex   |                           |                           |                            |                            |                           | 33 |
| 2  | 70.06513                  | 428.27065                  | 214.63896                  | 143.42840                 | 107.82312                  | 86.45995                  | P            | 4245.05991                | 2123.03359                | 1415.69149                 | <a href="#">1062.02043</a> | 849.81780                 | 32 |
| 3  | <a href="#">102.05496</a> | <a href="#">557.31324</a>  | 279.16026                  | 186.44260                 | 140.08377                  | 112.26847                 | E            | 4148.00714                | 2074.50721                | 1383.34057                 | 1037.75724                 | 830.40725                 | 31 |
| 4  | 72.08078                  | <a href="#">656.38166</a>  | <a href="#">328.69447</a>  | 219.46540                 | 164.85087                  | 132.08215                 | V            | 4018.96455                | 2009.98591                | 1340.32637                 | 1005.49659                 | 804.59873                 | 30 |
| 5  | 74.06004                  | <a href="#">757.42934</a>  | <a href="#">379.21831</a>  | 253.14796                 | 190.11279                  | 152.29169                 | T            | 3919.89614                | 1960.45171                | 1307.30356                 | 980.72949                  | 784.78505                 | 29 |
| 6  | <a href="#">133.04301</a> | <a href="#">917.45998</a>  | <a href="#">459.23363</a>  | 306.49151                 | <a href="#">230.12045</a>  | 184.29782                 | Carbamidomet | 3818.84846                | 1909.92787                | <a href="#">1273.62100</a> | 955.46757                  | 764.57551                 | 28 |
| 7  | 72.08078                  | <a href="#">1016.52840</a> | <a href="#">508.76784</a>  | 339.51432                 | 254.88756                  | 204.11150                 | V            | 3658.81781                | 1829.91254                | 1220.27745                 | <a href="#">915.45991</a>  | 732.56938                 | 27 |
| 8  | 72.08078                  | <a href="#">1115.59681</a> | <a href="#">558.30204</a>  | 372.53712                 | 279.65466                  | 223.92518                 | V            | 3559.74940                | 1780.37834                | 1187.25465                 | 890.69281                  | 712.75570                 | 26 |
| 9  | 72.08078                  | 1214.66523                 | <a href="#">607.83625</a>  | 405.55993                 | 304.42176                  | 243.73887                 | V            | 3460.68098                | 1730.84413                | 1154.23184                 | 865.92570                  | 692.94202                 | 25 |
| 10 | 88.03930                  | <a href="#">1329.69217</a> | <a href="#">665.34972</a>  | 443.90224                 | 333.17850                  | 266.74426                 | D            | 3361.61257                | 1681.30992                | <a href="#">1121.20904</a> | 841.15860                  | 673.12833                 | 24 |
| 11 | 72.08078                  | <a href="#">1428.76058</a> | 714.88393                  | 476.92505                 | 357.94560                  | 286.55794                 | V            | 3246.58562                | 1623.79645                | 1082.86673                 | 812.40186                  | 650.12295                 | 23 |
| 12 | 60.04439                  | 1515.79261                 | 758.39994                  | 505.93572                 | 379.70361                  | 303.96434                 | S            | 3147.51721                | 1574.26224                | <a href="#">1049.84392</a> | 787.63476                  | 630.30926                 | 22 |
| 13 | <a href="#">110.07127</a> | 1652.85152                 | 826.92940                  | 551.62203                 | 413.96834                  | 331.37613                 | H            | 3060.48518                | 1530.74623                | 1020.83325                 | <a href="#">765.87675</a>  | 612.90286                 | 21 |
| 14 | <a href="#">102.05496</a> | 1781.89412                 | <a href="#">891.45070</a>  | 594.63622                 | 446.22899                  | 357.18464                 | E            | 2923.42627                | 1462.21677                | 975.14694                  | 731.61203                  | 585.49108                 | 20 |
| 15 | 88.03930                  | 1896.92106                 | <a href="#">948.96417</a>  | 632.97854                 | 474.98572                  | <a href="#">380.19003</a> | D            | 2794.38368                | 1397.69548                | 932.13274                  | 699.35138                  | 559.68256                 | 19 |
| 16 | 70.06513                  | 1993.97382                 | 997.49055                  | <a href="#">665.32946</a> | 499.24891                  | 399.60059                 | P            | 2679.35673                | 1340.18201                | 893.79043                  | 670.59464                  | 536.67717                 | 18 |
| 17 | <a href="#">102.05496</a> | 2123.01642                 | <a href="#">1062.01185</a> | 708.34366                 | 531.50956                  | 425.40910                 | E            | 2582.30397                | 1291.65562                | 861.43951                  | <a href="#">646.33145</a>  | <a href="#">517.26662</a> | 17 |
| 18 | 72.08078                  | 2222.08483                 | <a href="#">1111.54605</a> | <a href="#">741.36646</a> | <a href="#">556.27666</a>  | 445.22279                 | V            | 2453.26138                | 1227.13433                | <a href="#">818.42531</a>  | 614.07080                  | 491.45810                 | 16 |
| 19 | 330.27026                 | 2579.34272                 | 1290.17500                 | 860.45243                 | 645.59114                  | 516.67437                 | K-TMT6plex   | 2354.19296                | 1177.60012                | 785.40251                  | 589.30370                  | 471.64441                 | 15 |
| 20 | <a href="#">120.08078</a> | 2726.41114                 | 1363.70921                 | 909.47523                 | 682.35824                  | 546.08805                 | F            | 1996.93507                | 998.97117                 | <a href="#">666.31654</a>  | 499.98922                  | 400.19284                 | 14 |
| 21 | 87.05529                  | 2840.45407                 | 1420.73067                 | 947.48954                 | 710.86897                  | 568.89663                 | N            | 1849.86666                | <a href="#">925.43697</a> | 617.29374                  | 463.22212                  | 370.77915                 | 13 |
| 22 | <a href="#">204.07675</a> | 3071.51846                 | 1536.26287                 | 1024.51100                | 768.63507                  | 615.10951                 | W-Nitro      | 1735.82373                | 868.41550                 | <a href="#">579.27943</a>  | 434.71139                  | 347.97057                 | 12 |
| 23 | 181.06077                 | 3279.56686                 | 1640.28707                 | 1093.86047                | 820.64717                  | 656.71919                 | Y-Nitro      | 1504.75934                | 752.88331                 | 502.25796                  | 376.94529                  | 301.75769                 | 11 |
| 24 | 72.08078                  | 3378.63528                 | 1689.82128                 | 1126.88328                | 845.41428                  | 676.53288                 | V            | 1296.71093                | 648.85910                 | 432.90849                  | 324.93319                  | 260.14801                 | 10 |
| 25 | 88.03930                  | 3493.66222                 | 1747.33475                 | 1165.22559                | 874.17101                  | 699.53827                 | D            | 1197.64252                | 599.32490                 | 399.88569                  | <a href="#">300.16609</a>  | 240.33432                 | 9  |
| 26 | 30.03383                  | 3550.68368                 | 1775.84548                 | 1184.23275                | 888.42638                  | 710.94256                 | G            | 1082.61557                | 541.81143                 | 361.54338                  | 271.40935                  | 217.32894                 | 8  |
| 27 | 72.08078                  | 3649.75210                 | 1825.37969                 | 1217.25555                | 913.19348                  | 730.75624                 | V            | 1025.59411                | 513.30069                 | 342.53622                  | 257.15398                  | 205.92464                 | 7  |
| 28 | <a href="#">102.05496</a> | 3778.79469                 | 1889.90098                 | 1260.26975                | 945.45413                  | 756.56476                 | E            | <a href="#">926.52570</a> | <a href="#">463.76649</a> | 309.51342                  | 232.38688                  | 186.11096                 | 6  |
| 29 | 72.08078                  | 3877.86310                 | 1939.43519                 | 1293.29255                | 970.22123                  | 776.37844                 | V            | <a href="#">797.48310</a> | <a href="#">399.24519</a> | 266.49922                  | 200.12623                  | 160.30244                 | 5  |
| 30 | <a href="#">110.07127</a> | 4014.92202                 | 2007.96465                 | 1338.97886                | <a href="#">1004.48596</a> | 803.79022                 | H            | <a href="#">698.41469</a> | <a href="#">349.71098</a> | 233.47641                  | 175.35913                  | 140.48876                 | 4  |
| 31 | 87.05529                  | 4128.96494                 | 2064.98611                 | 1376.99317                | 1032.99669                 | 826.59881                 | N            | <a href="#">561.35578</a> | 281.18153                 | 187.79011                  | <a href="#">141.09440</a>  | 113.07698                 | 3  |
| 32 | 44.04948                  | 4200.00206                 | 2100.50467                 | 1400.67220                | 1050.75597                 | 840.80623                 | A            | <a href="#">447.31285</a> | 224.16006                 | 149.77580                  | 112.58367                  | 90.26839                  | 2  |
| 33 | 330.27026                 |                            |                            |                           |                            |                           | K-TMT6plex   | <a href="#">376.27574</a> | 188.64151                 | 126.09676                  | 94.82439                   | 76.06097                  | 1  |

JM\_HuMarfanPlasma\_TMT7.raw #131541 RT: 371.0365 min  
 FTMS, 916.0607@hcd30.00, z=+5, Mono m/z=916.06073 Da, MH+=4576.27454 Da, Match Tol.=0.02 Da

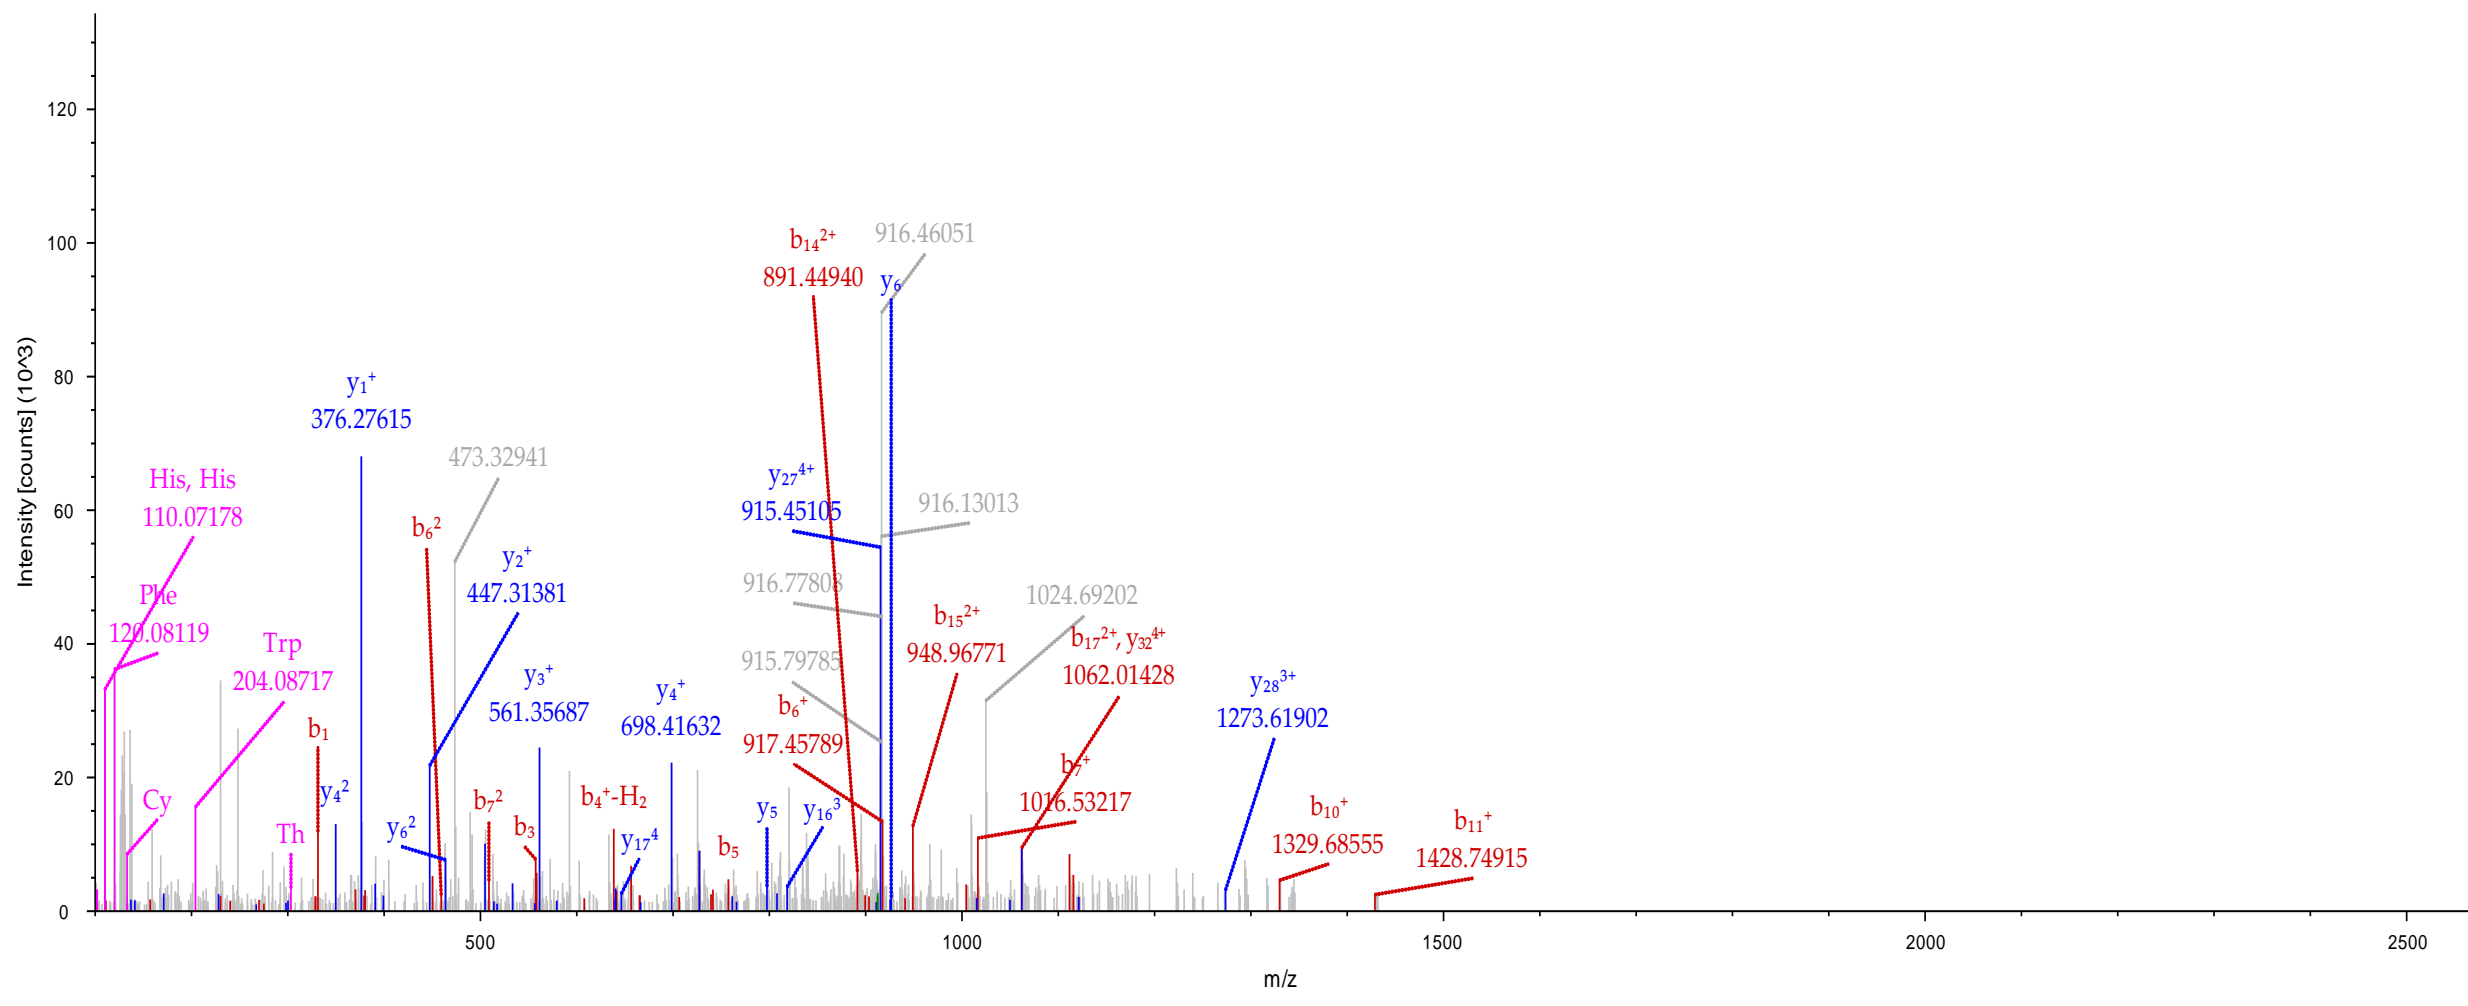

— Pre+H, Precursor, Precursor-H<sub>2</sub>O, Precursor-H<sub>2</sub>O-NH<sub>3</sub>, Precursor-NH<sub>3</sub>, Pre-H  
— Immonium  
— y, y-H<sub>2</sub>O, y-NH<sub>3</sub>  
— b, b-H<sub>2</sub>O, b-NH<sub>3</sub>

| #1 | Immonium  | b <sup>+</sup> | b <sup>2+</sup> | b <sup>3+</sup> | b <sup>4+</sup> | Seq.              | y <sup>+</sup> | y <sup>2+</sup> | y <sup>3+</sup> | y <sup>4+</sup> | #2 |
|----|-----------|----------------|-----------------|-----------------|-----------------|-------------------|----------------|-----------------|-----------------|-----------------|----|
| 1  | 316.21822 | 344.21314      | 172.61021       | 115.40923       | 86.80874        | N-TMT6plex        |                |                 |                 |                 | 30 |
| 2  | 120.08078 | 491.28155      | 246.14441       | 164.43203       | 123.57584       | F                 | 3328.62047     | 1664.81387      | 1110.21167      | 832.91057       | 29 |
| 3  | 70.06513  | 588.33431      | 294.67080       | 196.78296       | 147.83904       | P                 | 3181.55205     | 1591.27966      | 1061.18887      | 796.14347       | 28 |
| 4  | 70.06513  | 685.38708      | 343.19718       | 229.13388       | 172.10223       | P                 | 3084.49929     | 1542.75328      | 1028.83795      | 771.88028       | 27 |
| 5  | 60.04439  | 772.41911      | 386.71319       | 258.14455       | 193.86023       | S                 | 2987.44652     | 1494.22690      | 996.48703       | 747.61709       | 26 |
| 6  | 101.07094 | 900.47768      | 450.74248       | 300.83075       | 225.87488       | Q                 | 2900.41450     | 1450.71089      | 967.47635       | 725.85908       | 25 |
| 7  | 88.03930  | 1015.50463     | 508.25595       | 339.17306       | 254.63161       | D                 | 2772.35592     | 1386.68160      | 924.79016       | 693.84444       | 24 |
| 8  | 44.04948  | 1086.54174     | 543.77451       | 362.85210       | 272.39089       | A                 | 2657.32898     | 1329.16813      | 886.44784       | 665.08770       | 23 |
| 9  | 60.04439  | 1173.57377     | 587.29052       | 391.86277       | 294.14890       | S                 | 2586.29186     | 1293.64957      | 862.76881       | 647.32842       | 22 |
| 10 | 30.03383  | 1230.59523     | 615.80125       | 410.86993       | 308.40427       | G                 | 2499.25983     | 1250.13356      | 833.75813       | 625.57042       | 21 |
| 11 | 88.03930  | 1345.62217     | 673.31473       | 449.21224       | 337.16100       | D                 | 2442.23837     | 1221.62282      | 814.75097       | 611.31505       | 20 |
| 12 | 86.09643  | 1458.70624     | 729.85676       | 486.90693       | 365.43202       | L                 | 2327.21143     | 1164.10935      | 776.40866       | 582.55831       | 19 |
| 13 | 181.06077 | 1666.75465     | 833.88096       | 556.25640       | 417.44412       | Y-Nitro           | 2214.12736     | 1107.56732      | 738.71397       | 554.28730       | 18 |
| 14 | 74.06004  | 1767.80232     | 884.40480       | 589.93896       | 442.70604       | T                 | 2006.07896     | 1003.54312      | 669.36450       | 502.27520       | 17 |
| 15 | 74.06004  | 1868.85000     | 934.92864       | 623.62152       | 467.96796       | T                 | 1905.03128     | 953.01928       | 635.68194       | 477.01328       | 16 |
| 16 | 60.04439  | 1955.88203     | 978.44465       | 652.63219       | 489.72597       | S                 | 1803.98360     | 902.49544       | 601.99938       | 451.75136       | 15 |
| 17 | 60.04439  | 2042.91406     | 1021.96067      | 681.64287       | 511.48397       | S                 | 1716.95157     | 858.97942       | 572.98871       | 429.99335       | 14 |
| 18 | 101.07094 | 2170.97264     | 1085.98996      | 724.32906       | 543.49862       | Q                 | 1629.91954     | 815.46341       | 543.97803       | 408.23534       | 13 |
| 19 | 86.09643  | 2284.05670     | 1142.53199      | 762.02375       | 571.76963       | L                 | 1501.86097     | 751.43412       | 501.29184       | 376.22070       | 12 |
| 20 | 74.06004  | 2385.10438     | 1193.05583      | 795.70631       | 597.03155       | T                 | 1388.77690     | 694.89209       | 463.59715       | 347.94968       | 11 |
| 21 | 86.09643  | 2498.18844     | 1249.59786      | 833.40100       | 625.30257       | L                 | 1287.72922     | 644.36825       | 429.91459       | 322.68776       | 10 |
| 22 | 70.06513  | 2595.24121     | 1298.12424      | 865.75192       | 649.56576       | P                 | 1174.64516     | 587.82622       | 392.21990       | 294.41675       | 9  |
| 23 | 44.04948  | 2666.27832     | 1333.64280      | 889.43096       | 667.32504       | A                 | 1077.59240     | 539.29984       | 359.86898       | 270.15356       | 8  |
| 24 | 74.06004  | 2767.32600     | 1384.16664      | 923.11352       | 692.58696       | T                 | 1006.55528     | 503.78128       | 336.18995       | 252.39428       | 7  |
| 25 | 101.07094 | 2895.38458     | 1448.19593      | 965.79971       | 724.60160       | Q                 | 905.50760      | 453.25744       | 302.50739       | 227.13236       | 6  |
| 26 | 133.04301 | 3055.41522     | 1528.21125      | 1019.14326      | 764.60926       | C-Carbamidomethyl | 777.44903      | 389.22815       | 259.82119       | 195.11771       | 5  |
| 27 | 86.09643  | 3168.49929     | 1584.75328      | 1056.83795      | 792.88028       | L                 | 617.41838      | 309.21283       | 206.47764       | 155.11005       | 4  |
| 28 | 44.04948  | 3239.53640     | 1620.27184      | 1080.51699      | 810.63956       | A                 | 504.33431      | 252.67080       | 168.78296       | 126.83904       | 3  |
| 29 | 30.03383  | 3296.55787     | 1648.78257      | 1099.52414      | 824.89492       | G                 | 433.29720      | 217.15224       | 145.10392       | 109.07976       | 2  |
| 30 | 330.27026 |                |                 |                 |                 | K-TMT6plex        | 376.27574      | 188.64151       | 126.09676       | 94.82439        | 1  |

JM\_HuMarfanPlasma\_TMT5\_Fr3.raw #69655 RT: 204.3350 min  
FTMS, 918.9625@hcd30.00, z=+4, Mono m/z=918.96246 Da, MH+=3672.82802 Da, Match Tol.=0.02 Da

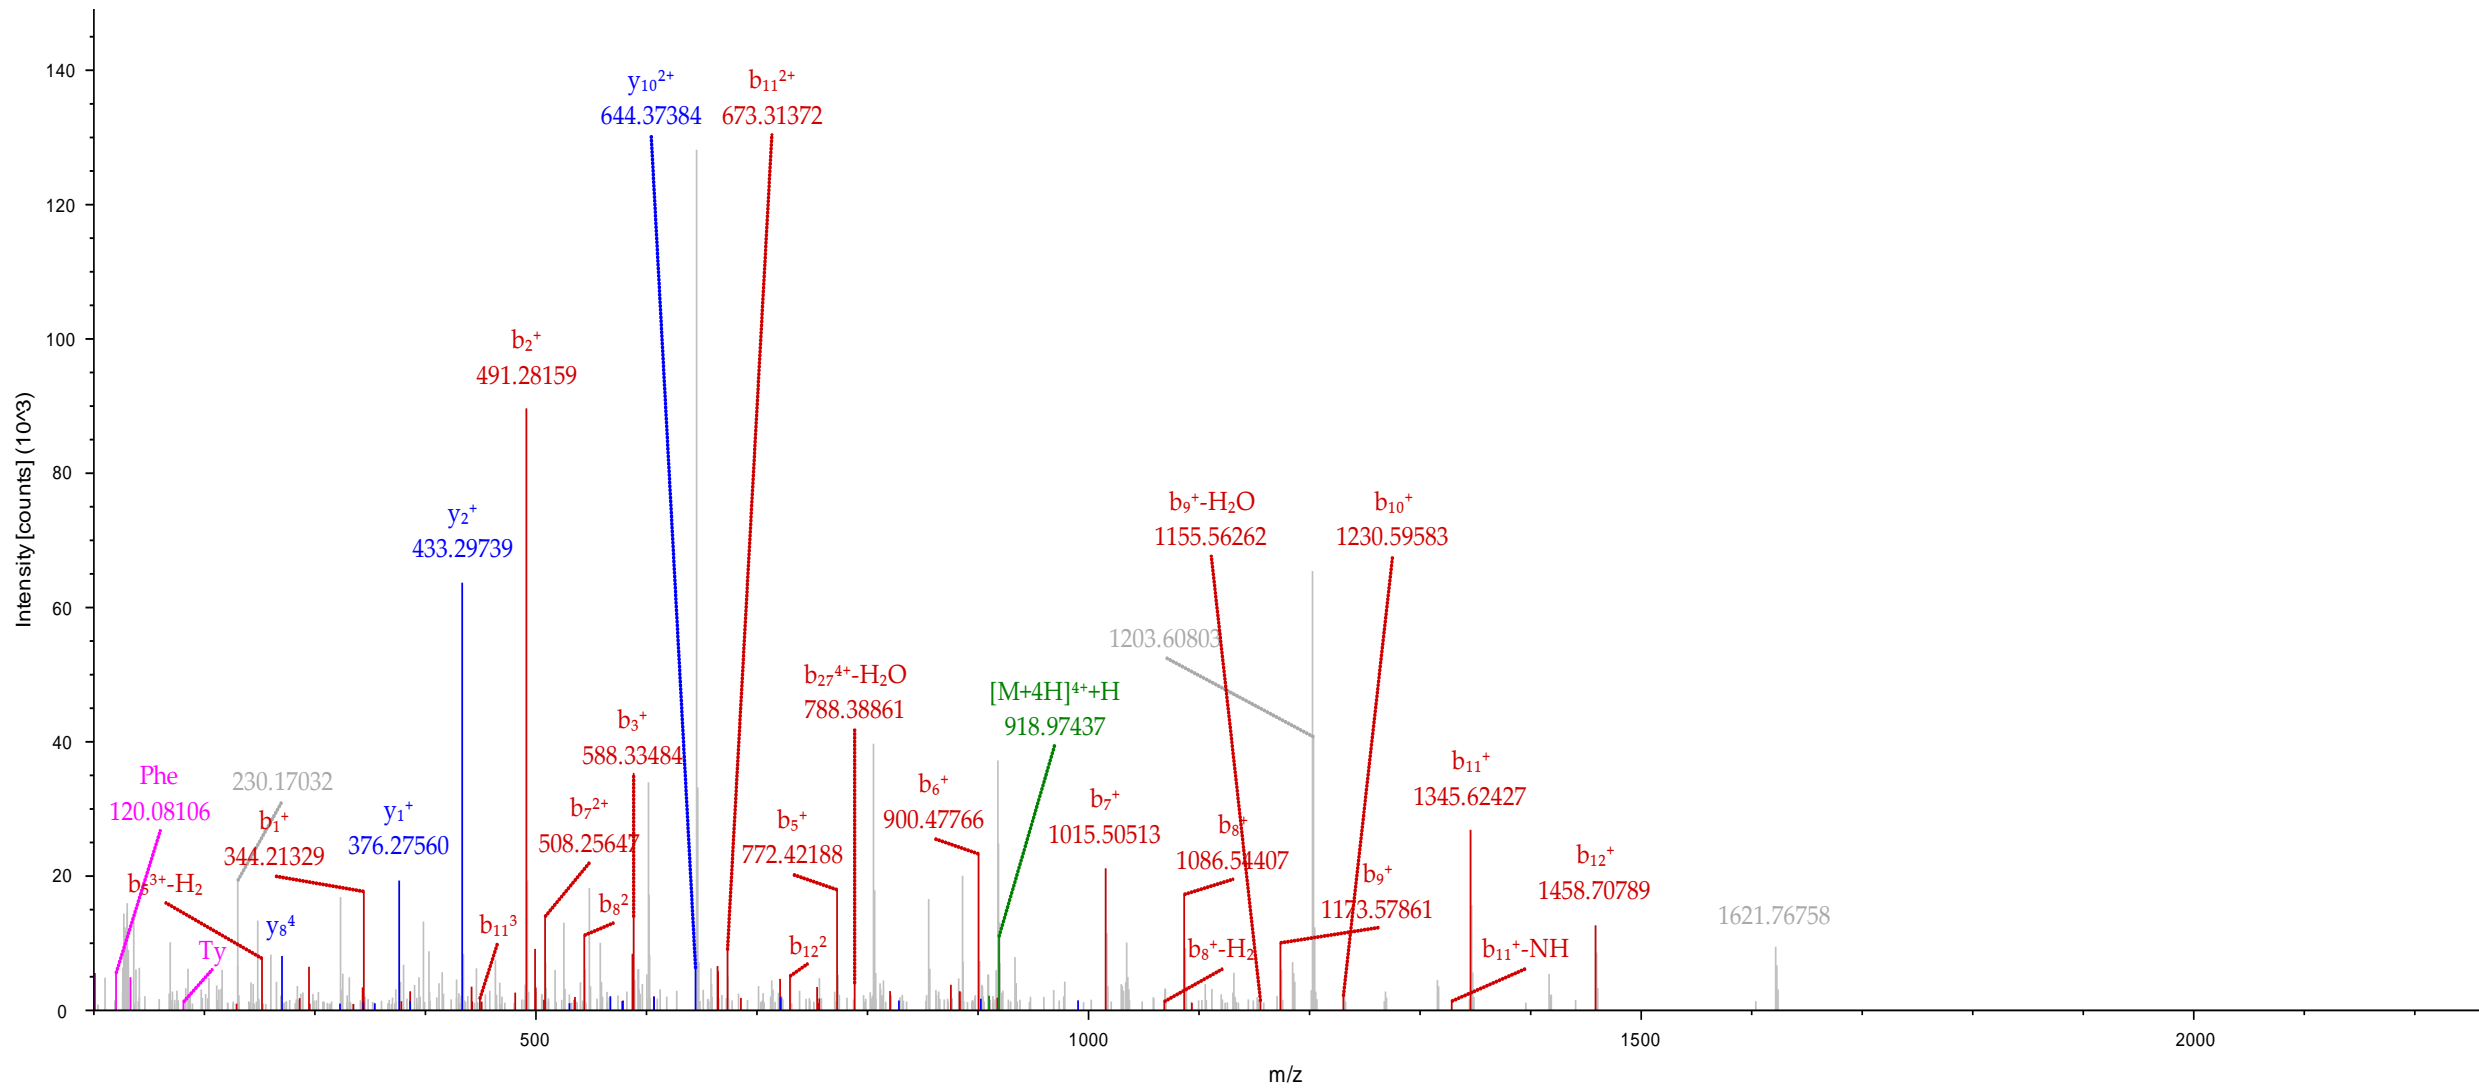

— Pre+H, Precursor, Precursor-H<sub>2</sub>O, Precursor-H<sub>2</sub>O-NH<sub>3</sub>, Precursor-NH<sub>3</sub>, Pre-H  
— y, y-H<sub>2</sub>O, y-NH<sub>3</sub>  
— Immonium  
— b, b-H<sub>2</sub>O, b-NH<sub>3</sub>



| #1 | Immonium  | b <sup>+</sup> | b <sup>2+</sup> | b <sup>3+</sup> | Seq.       | y <sup>+</sup> | y <sup>2+</sup> | y <sup>3+</sup> | #2 |
|----|-----------|----------------|-----------------|-----------------|------------|----------------|-----------------|-----------------|----|
| 1  | 259.19676 | 287.19167      | 144.09947       | 96.40208        | G-TMT6plex |                |                 |                 | 22 |
| 2  | 120.08078 | 434.26009      | 217.63368       | 145.42488       | F          | 2777.25283     | 1389.13006      | 926.42246       | 21 |
| 3  | 136.07569 | 597.32341      | 299.16535       | 199.77932       | Y          | 2630.18442     | 1315.59585      | 877.39966       | 20 |
| 4  | 70.06513  | 694.37618      | 347.69173       | 232.13024       | P          | 2467.12109     | 1234.06418      | 823.04521       | 19 |
| 5  | 60.04439  | 781.40821      | 391.20774       | 261.14092       | S          | 2370.06833     | 1185.53780      | 790.69429       | 18 |
| 6  | 88.03930  | 896.43515      | 448.72121       | 299.48323       | D          | 2283.03630     | 1142.02179      | 761.68362       | 17 |
| 7  | 86.09643  | 1009.51921     | 505.26325       | 337.17792       | I          | 2168.00936     | 1084.50832      | 723.34130       | 16 |
| 8  | 60.04439  | 1096.55124     | 548.77926       | 366.18860       | S          | 2054.92529     | 1027.96628      | 685.64662       | 15 |
| 9  | 72.08078  | 1195.61966     | 598.31347       | 399.21140       | V          | 1967.89326     | 984.45027       | 656.63594       | 14 |
| 10 | 102.05496 | 1324.66225     | 662.83476       | 442.22560       | E          | 1868.82485     | 934.91606       | 623.61313       | 13 |
| 11 | 204.07675 | 1555.72664     | 778.36696       | 519.24706       | W-Nitro    | 1739.78226     | 870.39477       | 580.59894       | 12 |
| 12 | 102.05496 | 1684.76923     | 842.88825       | 562.26126       | E          | 1508.71787     | 754.86257       | 503.57747       | 11 |
| 13 | 60.04439  | 1771.80126     | 886.40427       | 591.27194       | S          | 1379.67527     | 690.34127       | 460.56328       | 10 |
| 14 | 87.05529  | 1885.84419     | 943.42573       | 629.28625       | N          | 1292.64324     | 646.82526       | 431.55260       | 9  |
| 15 | 30.03383  | 1942.86565     | 971.93646       | 648.29340       | G          | 1178.60032     | 589.80380       | 393.53829       | 8  |
| 16 | 101.07094 | 2070.92423     | 1035.96575      | 690.97959       | Q          | 1121.57885     | 561.29307       | 374.53114       | 7  |
| 17 | 70.06513  | 2167.97699     | 1084.49214      | 723.33052       | P          | 993.52028      | 497.26378       | 331.84494       | 6  |
| 18 | 102.05496 | 2297.01959     | 1149.01343      | 766.34471       | E          | 896.46751      | 448.73739       | 299.49402       | 5  |
| 19 | 87.05529  | 2411.06251     | 1206.03490      | 804.35902       | N          | 767.42492      | 384.21610       | 256.47982       | 4  |
| 20 | 87.05529  | 2525.10544     | 1263.05636      | 842.37333       | N          | 653.38199      | 327.19463       | 218.46552       | 3  |
| 21 | 136.07569 | 2688.16877     | 1344.58802      | 896.72777       | Y          | 539.33906      | 270.17317       | 180.45121       | 2  |
| 22 | 330.27026 |                |                 |                 | K-TMT6plex | 376.27574      | 188.64151       | 126.09676       | 1  |

JM\_HuMarfanPlasma\_TMT1.raw #110555 RT: 305.9664 min  
 FTMS, 1022.8182@hcd30.00, z=+3, Mono m/z=1022.48041 Da, MH+=3065.42667 Da, Match Tol.=0.02 Da

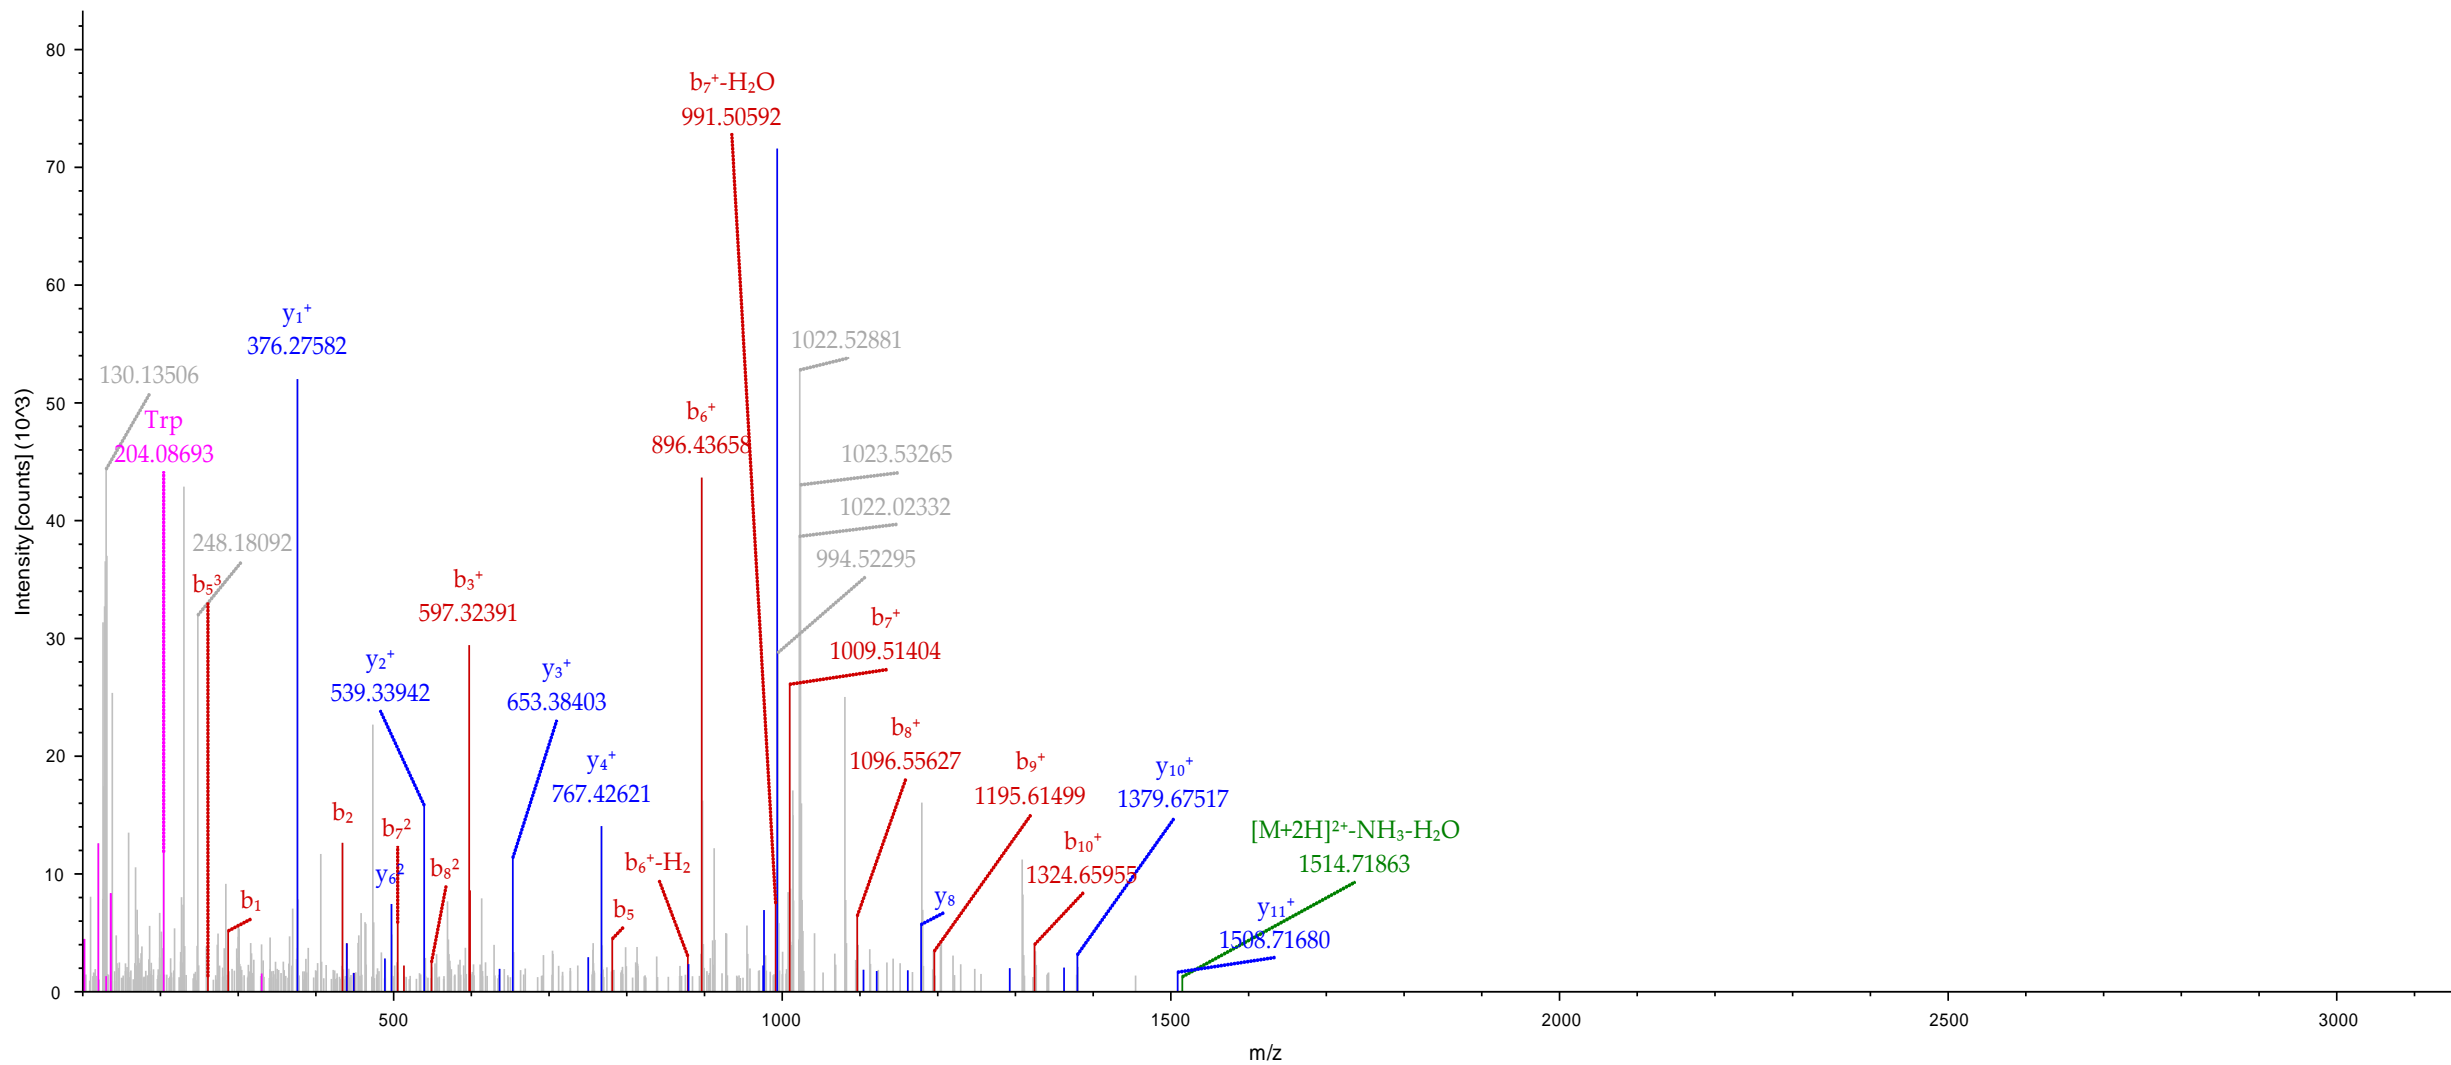

— Pre+H, Precursor, Precursor-H<sub>2</sub>O, Precursor-H<sub>2</sub>O-NH<sub>3</sub>, Precursor-NH<sub>3</sub>, Pre-H   
 — Immonium  
— y, y-H<sub>2</sub>O, y-NH<sub>3</sub>   
 — b, b-H<sub>2</sub>O, b-NH<sub>3</sub>

| #1 | Immonium  | b <sup>+</sup> | b <sup>2+</sup> | b <sup>3+</sup> | Seq.       | y <sup>+</sup> | y <sup>2+</sup> | y <sup>3+</sup> | #2 |
|----|-----------|----------------|-----------------|-----------------|------------|----------------|-----------------|-----------------|----|
| 1  | 303.22297 | 331.21789      | 166.11258       | 111.07748       | T-TMT6plex |                |                 |                 | 17 |
| 2  | 74.06004  | 432.26557      | 216.63642       | 144.76004       | T          | 2078.99422     | 1040.00075      | 693.66959       | 16 |
| 3  | 70.06513  | 529.31833      | 265.16280       | 177.11096       | P          | 1977.94655     | 989.47691       | 659.98703       | 15 |
| 4  | 70.06513  | 626.37109      | 313.68918       | 209.46188       | P          | 1880.89378     | 940.95053       | 627.63611       | 14 |
| 5  | 104.05285 | 757.41158      | 379.20943       | 253.14204       | M          | 1783.84102     | 892.42415       | 595.28519       | 13 |
| 6  | 86.09643  | 870.49564      | 435.75146       | 290.83673       | L          | 1652.80053     | 826.90390       | 551.60503       | 12 |
| 7  | 88.03930  | 985.52258      | 493.26493       | 329.17905       | D          | 1539.71647     | 770.36187       | 513.91034       | 11 |
| 8  | 60.04439  | 1072.55461     | 536.78094       | 358.18972       | S          | 1424.68953     | 712.84840       | 475.56803       | 10 |
| 9  | 88.03930  | 1187.58156     | 594.29442       | 396.53204       | D          | 1337.65750     | 669.33239       | 446.55735       | 9  |
| 10 | 30.03383  | 1244.60302     | 622.80515       | 415.53919       | G          | 1222.63055     | 611.81892       | 408.21504       | 8  |
| 11 | 60.04439  | 1331.63505     | 666.32116       | 444.54987       | S          | 1165.60909     | 583.30818       | 389.20788       | 7  |
| 12 | 120.08078 | 1478.70346     | 739.85537       | 493.57267       | F          | 1078.57706     | 539.79217       | 360.19721       | 6  |
| 13 | 120.08078 | 1625.77188     | 813.38958       | 542.59548       | F          | 931.50865      | 466.25796       | 311.17440       | 5  |
| 14 | 86.09643  | 1738.85594     | 869.93161       | 580.29016       | L          | 784.44024      | 392.72376       | 262.15160       | 4  |
| 15 | 181.06077 | 1946.90435     | 973.95581       | 649.63963       | Y-Nitro    | 671.35617      | 336.18172       | 224.45691       | 3  |
| 16 | 60.04439  | 2033.93637     | 1017.47183      | 678.65031       | S          | 463.30776      | 232.15752       | 155.10744       | 2  |
| 17 | 330.27026 |                |                 |                 | K-TMT6plex | 376.27574      | 188.64151       | 126.09676       | 1  |

JM\_HuMarfanPlasma\_TMT2.raw #100743 RT: 277.4952 min  
FTMS, 803.7437@hcd30.00, z=+3, Mono m/z=803.40961 Da, MH+=2408.21427 Da, Match Tol.=0.02 Da

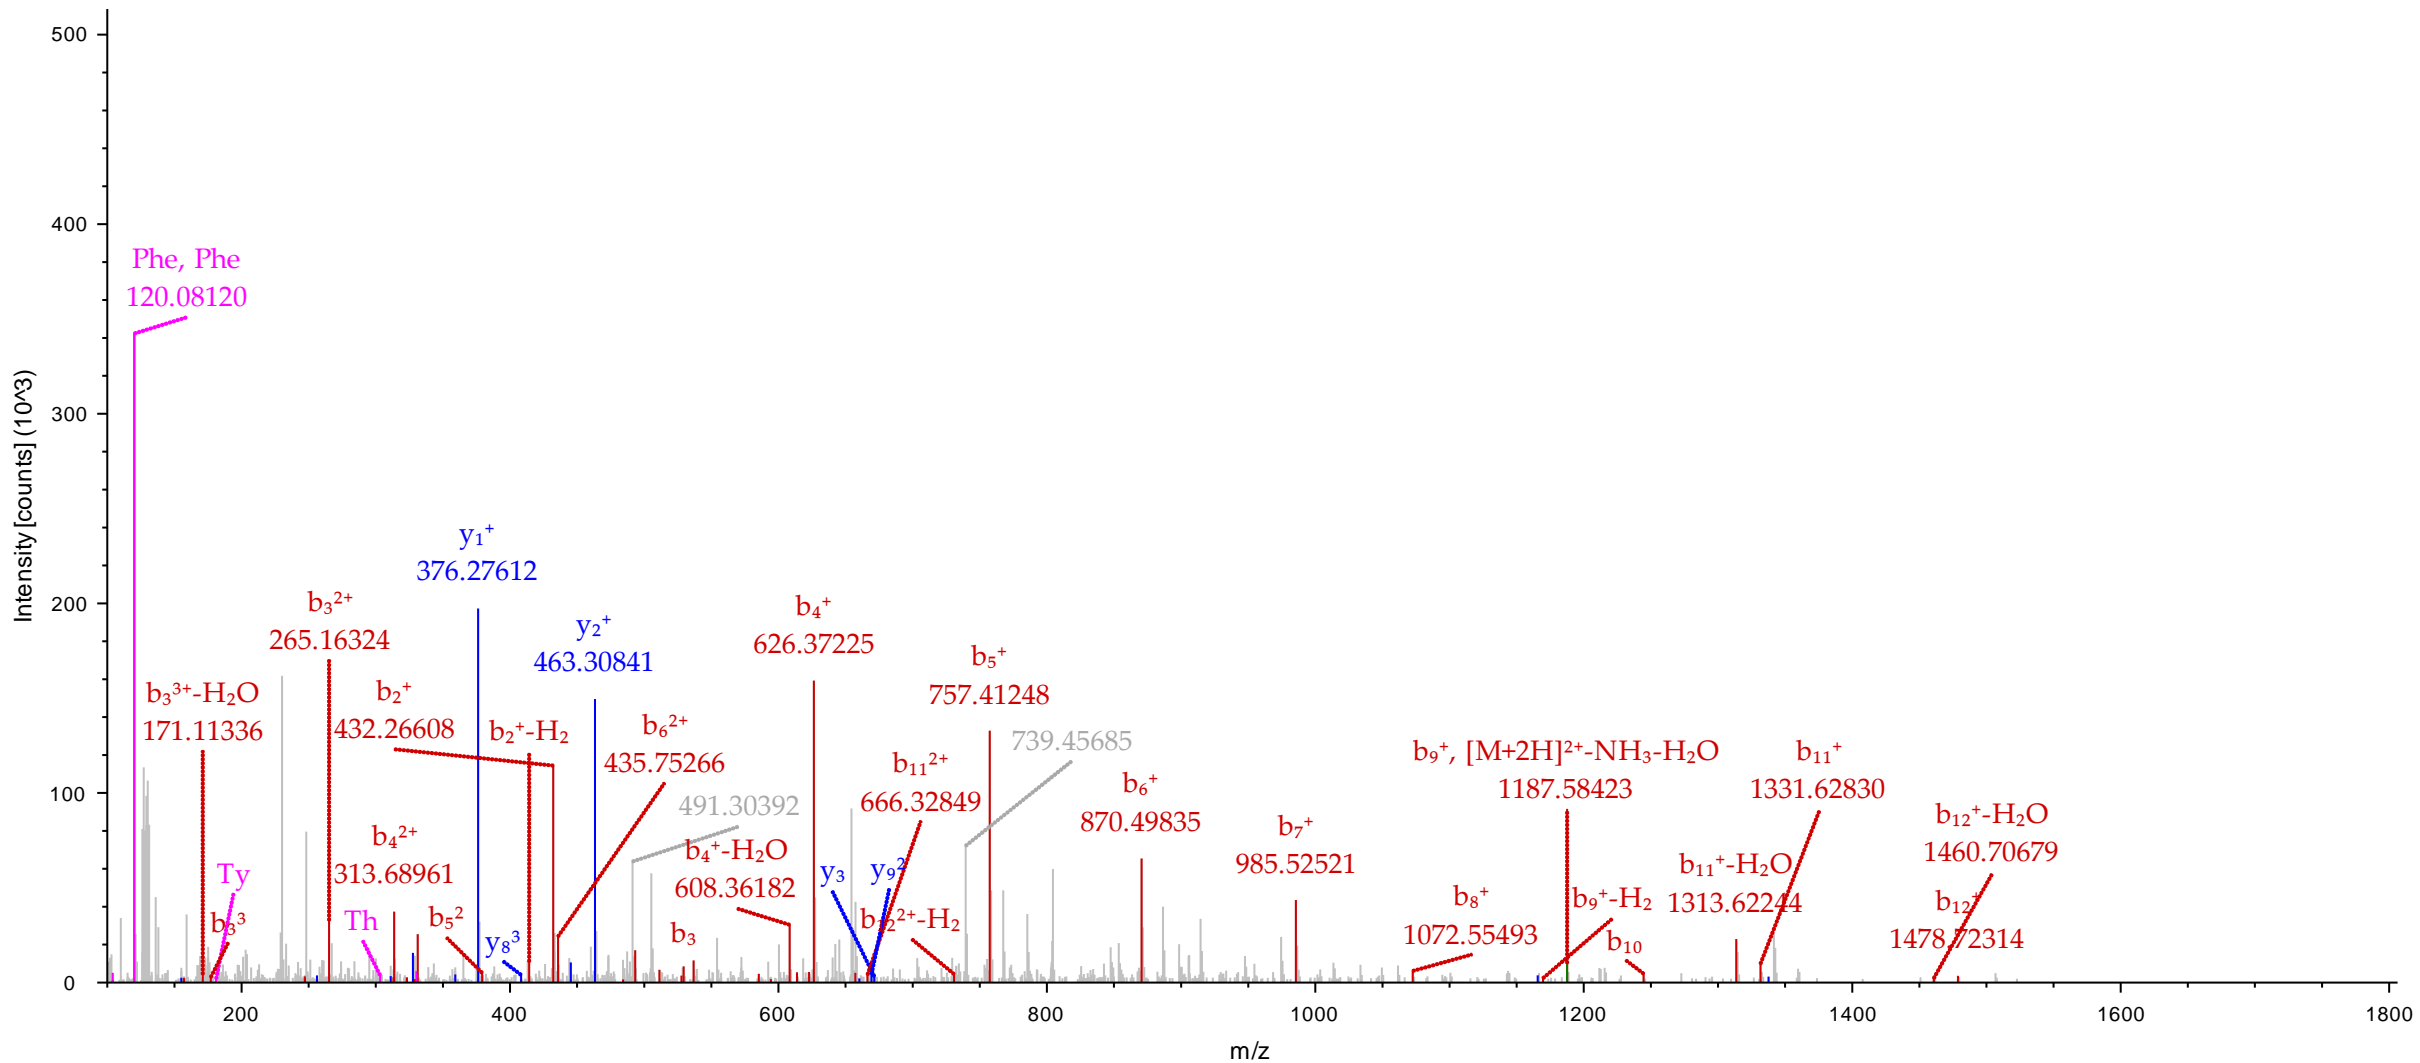

— Pre+H, Precursor, Precursor- $H_2O$ , Precursor- $H_2O-NH_3$ , Precursor- $NH_3$ , Pre-H — Immonium  
— y, y- $H_2O$ , y- $NH_3$  — b, b- $H_2O$ , b- $NH_3$

| #1 | Immonium  | b <sup>+</sup> | b <sup>2+</sup> | b <sup>3+</sup> | Seq.       | y <sup>+</sup> | y <sup>2+</sup> | y <sup>3+</sup> | #2 |
|----|-----------|----------------|-----------------|-----------------|------------|----------------|-----------------|-----------------|----|
| 1  | 301.24371 | 329.23862      | 165.12295       | 110.41773       | V-TMT6plex |                |                 |                 | 16 |
| 2  | 72.08078  | 428.30704      | 214.65716       | 143.44053       | V          | 1969.07044     | 985.03886       | 657.02833       | 15 |
| 3  | 60.04439  | 515.33906      | 258.17317       | 172.45121       | S          | 1870.00203     | 935.50465       | 624.00553       | 14 |
| 4  | 72.08078  | 614.40748      | 307.70738       | 205.47401       | V          | 1782.97000     | 891.98864       | 594.99485       | 13 |
| 5  | 86.09643  | 727.49154      | 364.24941       | 243.16870       | L          | 1683.90158     | 842.45443       | 561.97205       | 12 |
| 6  | 74.06004  | 828.53922      | 414.77325       | 276.85126       | T          | 1570.81752     | 785.91240       | 524.27736       | 11 |
| 7  | 72.08078  | 927.60763      | 464.30746       | 309.87406       | V          | 1469.76984     | 735.38856       | 490.59480       | 10 |
| 8  | 72.08078  | 1026.67605     | 513.84166       | 342.89687       | V          | 1370.70143     | 685.85435       | 457.57199       | 9  |
| 9  | 110.07127 | 1163.73496     | 582.37112       | 388.58317       | H          | 1271.63301     | 636.32015       | 424.54919       | 8  |
| 10 | 101.07094 | 1291.79354     | 646.40041       | 431.26936       | Q          | 1134.57410     | 567.79069       | 378.86289       | 7  |
| 11 | 88.03930  | 1406.82048     | 703.91388       | 469.61168       | D          | 1006.51553     | 503.76140       | 336.17669       | 6  |
| 12 | 204.07675 | 1637.88487     | 819.44607       | 546.63314       | W-Nitro    | 891.48858      | 446.24793       | 297.83438       | 5  |
| 13 | 86.09643  | 1750.96894     | 875.98811       | 584.32783       | L          | 660.42419      | 330.71573       | 220.81291       | 4  |
| 14 | 87.05529  | 1865.01186     | 933.00957       | 622.34214       | N          | 547.34013      | 274.17370       | 183.11823       | 3  |
| 15 | 30.03383  | 1922.03333     | 961.52030       | 641.34929       | G          | 433.29720      | 217.15224       | 145.10392       | 2  |
| 16 | 330.27026 |                |                 |                 | K-TMT6plex | 376.27574      | 188.64151       | 126.09676       | 1  |

JM\_HuMarfanPlasma\_TMT5.raw #100300 RT: 280.4820 min  
FTMS, 767.1134@hcd30.00, z=+3, Mono m/z=766.77808 Da, MH+=2298.31968 Da, Match Tol.=0.02 Da

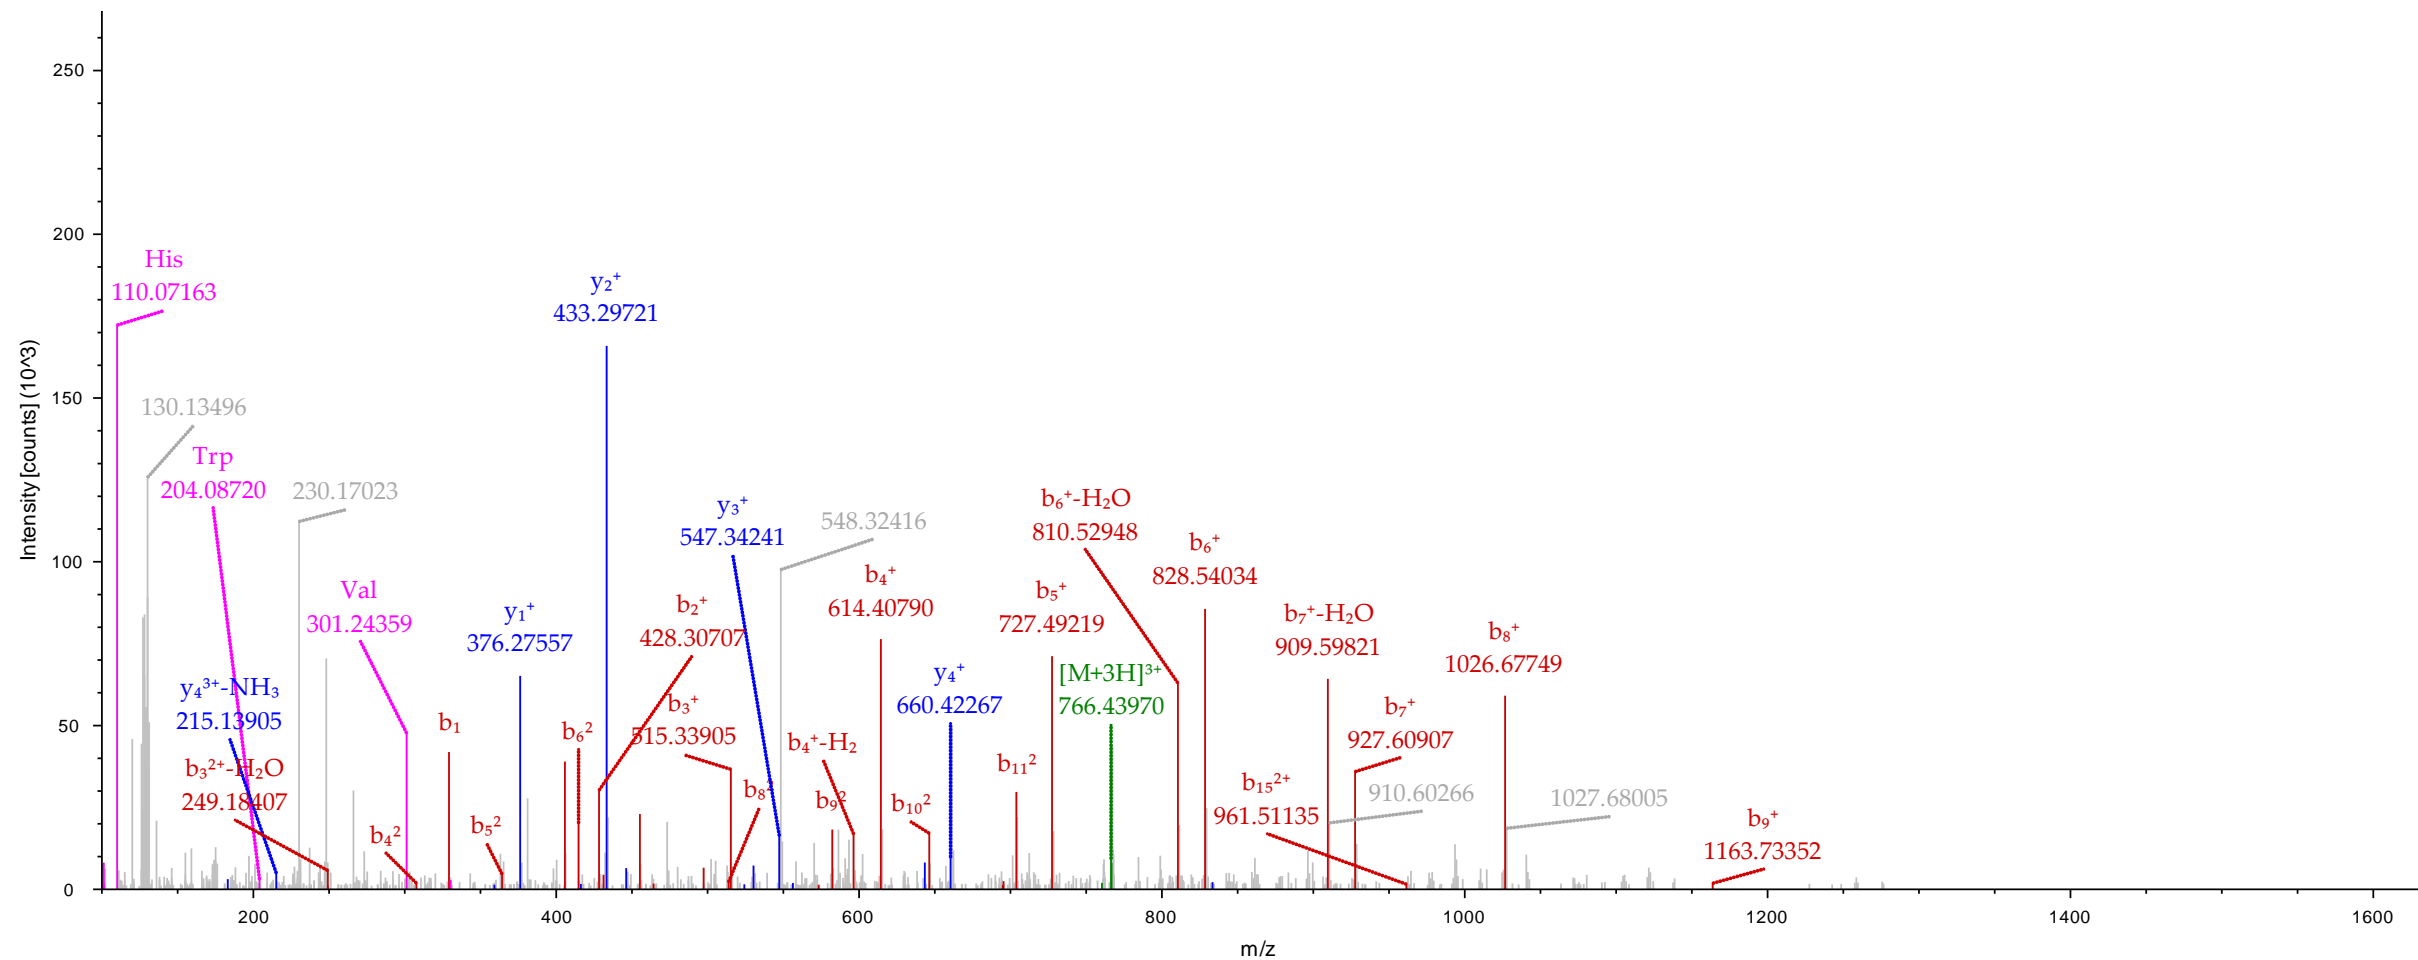

— Pre-H, Precursor, Precursor-H<sub>2</sub>O, Precursor-H<sub>2</sub>O-NH<sub>3</sub>, Precursor-NH<sub>3</sub>, Pre-H — Immonium  
— y, y-H<sub>2</sub>O, y-NH<sub>3</sub> — b, b-H<sub>2</sub>O, b-NH<sub>3</sub>

| #1 | Immonium  | b <sup>+</sup> | b <sup>2+</sup> | b <sup>3+</sup> | b <sup>4+</sup> | b <sup>5+</sup> | Seq.              | y <sup>+</sup> | y <sup>2+</sup> | y <sup>3+</sup> | y <sup>4+</sup> | y <sup>5+</sup> | #2 |
|----|-----------|----------------|-----------------|-----------------|-----------------|-----------------|-------------------|----------------|-----------------|-----------------|-----------------|-----------------|----|
| 1  | 303.22297 | 331.21789      | 166.11258       | 111.07748       | 83.55993        | 67.04940        | T-TMT6plex        |                |                 |                 |                 |                 | 33 |
| 2  | 70.06513  | 428.27065      | 214.63896       | 143.42840       | 107.82312       | 86.45995        | P                 | 4015.86059     | 2008.43393      | 1339.29171      | 1004.72060      | 803.97794       | 32 |
| 3  | 102.05496 | 557.31324      | 279.16026       | 186.44260       | 140.08377       | 112.26847       | E                 | 3918.80783     | 1959.90755      | 1306.94079      | 980.45741       | 784.56739       | 31 |
| 4  | 72.08078  | 656.38166      | 328.69447       | 219.46540       | 164.85087       | 132.08215       | V                 | 3789.76523     | 1895.38625      | 1263.92660      | 948.19677       | 758.75887       | 30 |
| 5  | 74.06004  | 757.42934      | 379.21831       | 253.14796       | 190.11279       | 152.29169       | T                 | 3690.69682     | 1845.85205      | 1230.90379      | 923.42966       | 738.94519       | 29 |
| 6  | 133.04301 | 917.45998      | 459.23363       | 306.49151       | 230.12045       | 184.29782       | C-Carbamidomethyl | 3589.64914     | 1795.32821      | 1197.22123      | 898.16774       | 718.73565       | 28 |
| 7  | 72.08078  | 1016.52840     | 508.76784       | 339.51432       | 254.88756       | 204.11150       | V                 | 3429.61849     | 1715.31288      | 1143.87768      | 858.16008       | 686.72952       | 27 |
| 8  | 72.08078  | 1115.59681     | 558.30204       | 372.53712       | 279.65466       | 223.92518       | V                 | 3330.55008     | 1665.77868      | 1110.85488      | 833.39298       | 666.91584       | 26 |
| 9  | 72.08078  | 1214.66523     | 607.83625       | 405.55993       | 304.42176       | 243.73887       | V                 | 3231.48166     | 1616.24447      | 1077.83207      | 808.62587       | 647.10215       | 25 |
| 10 | 88.03930  | 1329.69217     | 665.34972       | 443.90224       | 333.17850       | 266.74426       | D                 | 3132.41325     | 1566.71026      | 1044.80927      | 783.85877       | 627.28847       | 24 |
| 11 | 72.08078  | 1428.76058     | 714.88393       | 476.92505       | 357.94560       | 286.55794       | V                 | 3017.38631     | 1509.19679      | 1006.46695      | 755.10203       | 604.28308       | 23 |
| 12 | 60.04439  | 1515.79261     | 758.39994       | 505.93572       | 379.70361       | 303.96434       | S                 | 2918.31789     | 1459.66258      | 973.44415       | 730.33493       | 584.46940       | 22 |
| 13 | 110.07127 | 1652.85152     | 826.92940       | 551.62203       | 413.96834       | 331.37613       | H                 | 2831.28586     | 1416.14657      | 944.43347       | 708.57692       | 567.06299       | 21 |
| 14 | 102.05496 | 1781.89412     | 891.45070       | 594.63622       | 446.22899       | 357.18464       | E                 | 2694.22695     | 1347.61711      | 898.74717       | 674.31220       | 539.65121       | 20 |
| 15 | 88.03930  | 1896.92106     | 948.96417       | 632.97854       | 474.98572       | 380.19003       | D                 | 2565.18436     | 1283.09582      | 855.73297       | 642.05155       | 513.84269       | 19 |
| 16 | 70.06513  | 1993.97382     | 997.49055       | 665.32946       | 499.24891       | 399.60059       | P                 | 2450.15742     | 1225.58235      | 817.39066       | 613.29481       | 490.83730       | 18 |
| 17 | 102.05496 | 2123.01642     | 1062.01185      | 708.34366       | 531.50956       | 425.40910       | E                 | 2353.10465     | 1177.05597      | 785.03974       | 589.03162       | 471.42675       | 17 |
| 18 | 72.08078  | 2222.08483     | 1111.54605      | 741.36646       | 556.27666       | 445.22279       | V                 | 2224.06206     | 1112.53467      | 742.02554       | 556.77097       | 445.61823       | 16 |
| 19 | 101.07094 | 2350.14341     | 1175.57534      | 784.05265       | 588.29131       | 470.83450       | Q                 | 2124.99365     | 1063.00046      | 709.00273       | 532.00387       | 425.80455       | 15 |
| 20 | 120.08078 | 2497.21182     | 1249.10955      | 833.07546       | 625.05841       | 500.24819       | F                 | 1996.93507     | 998.97117       | 666.31654       | 499.98922       | 400.19284       | 14 |
| 21 | 87.05529  | 2611.25475     | 1306.13101      | 871.08977       | 653.56914       | 523.05677       | N                 | 1849.86666     | 925.43697       | 617.29374       | 463.22212       | 370.77915       | 13 |
| 22 | 204.07675 | 2842.31914     | 1421.66321      | 948.11123       | 711.33524       | 569.26965       | W-Nitro           | 1735.82373     | 868.41550       | 579.27943       | 434.71139       | 347.97057       | 12 |
| 23 | 181.06077 | 3050.36755     | 1525.68741      | 1017.46070      | 763.34734       | 610.87933       | Y-Nitro           | 1504.75934     | 752.88331       | 502.25796       | 376.94529       | 301.75769       | 11 |
| 24 | 72.08078  | 3149.43596     | 1575.22162      | 1050.48350      | 788.11445       | 630.69301       | V                 | 1296.71093     | 648.85910       | 432.90849       | 324.93319       | 260.14801       | 10 |
| 25 | 88.03930  | 3264.46290     | 1632.73509      | 1088.82582      | 816.87118       | 653.69840       | D                 | 1197.64252     | 599.32490       | 399.88569       | 300.16609       | 240.33432       | 9  |
| 26 | 30.03383  | 3321.48437     | 1661.24582      | 1107.83297      | 831.12655       | 665.10269       | G                 | 1082.61557     | 541.81143       | 361.54338       | 271.40935       | 217.32894       | 8  |
| 27 | 72.08078  | 3420.55278     | 1710.78003      | 1140.85578      | 855.89365       | 684.91638       | V                 | 1025.59411     | 513.30069       | 342.53622       | 257.15398       | 205.92464       | 7  |
| 28 | 102.05496 | 3549.59537     | 1775.30132      | 1183.86998      | 888.15430       | 710.72490       | E                 | 926.52570      | 463.76649       | 309.51342       | 232.38688       | 186.11096       | 6  |
| 29 | 72.08078  | 3648.66379     | 1824.83553      | 1216.89278      | 912.92140       | 730.53858       | V                 | 797.48310      | 399.24519       | 266.49922       | 200.12623       | 160.30244       | 5  |
| 30 | 110.07127 | 3785.72270     | 1893.36499      | 1262.57908      | 947.18613       | 757.95036       | H                 | 698.41469      | 349.71098       | 233.47641       | 175.35913       | 140.48876       | 4  |
| 31 | 87.05529  | 3899.76563     | 1950.38645      | 1300.59339      | 975.69686       | 780.75895       | N                 | 561.35578      | 281.18153       | 187.79011       | 141.09440       | 113.07698       | 3  |
| 32 | 44.04948  | 3970.80274     | 1985.90501      | 1324.27243      | 993.45614       | 794.96637       | A                 | 447.31285      | 224.16006       | 149.77580       | 112.58367       | 90.26839        | 2  |
| 33 | 330.27026 |                |                 |                 |                 |                 | K-TMT6plex        | 376.27574      | 188.64151       | 126.09676       | 94.82439        | 76.06097        | 1  |

JM\_HuMarfanPlasma\_TMT6\_Fr3.raw #106130 RT: 311.4090 min  
 FTMS, 870.2261@hcd30.00, z=+5, Mono m/z=870.22638 Da, MH+=4347.10279 Da, Match Tol.=0.02 Da

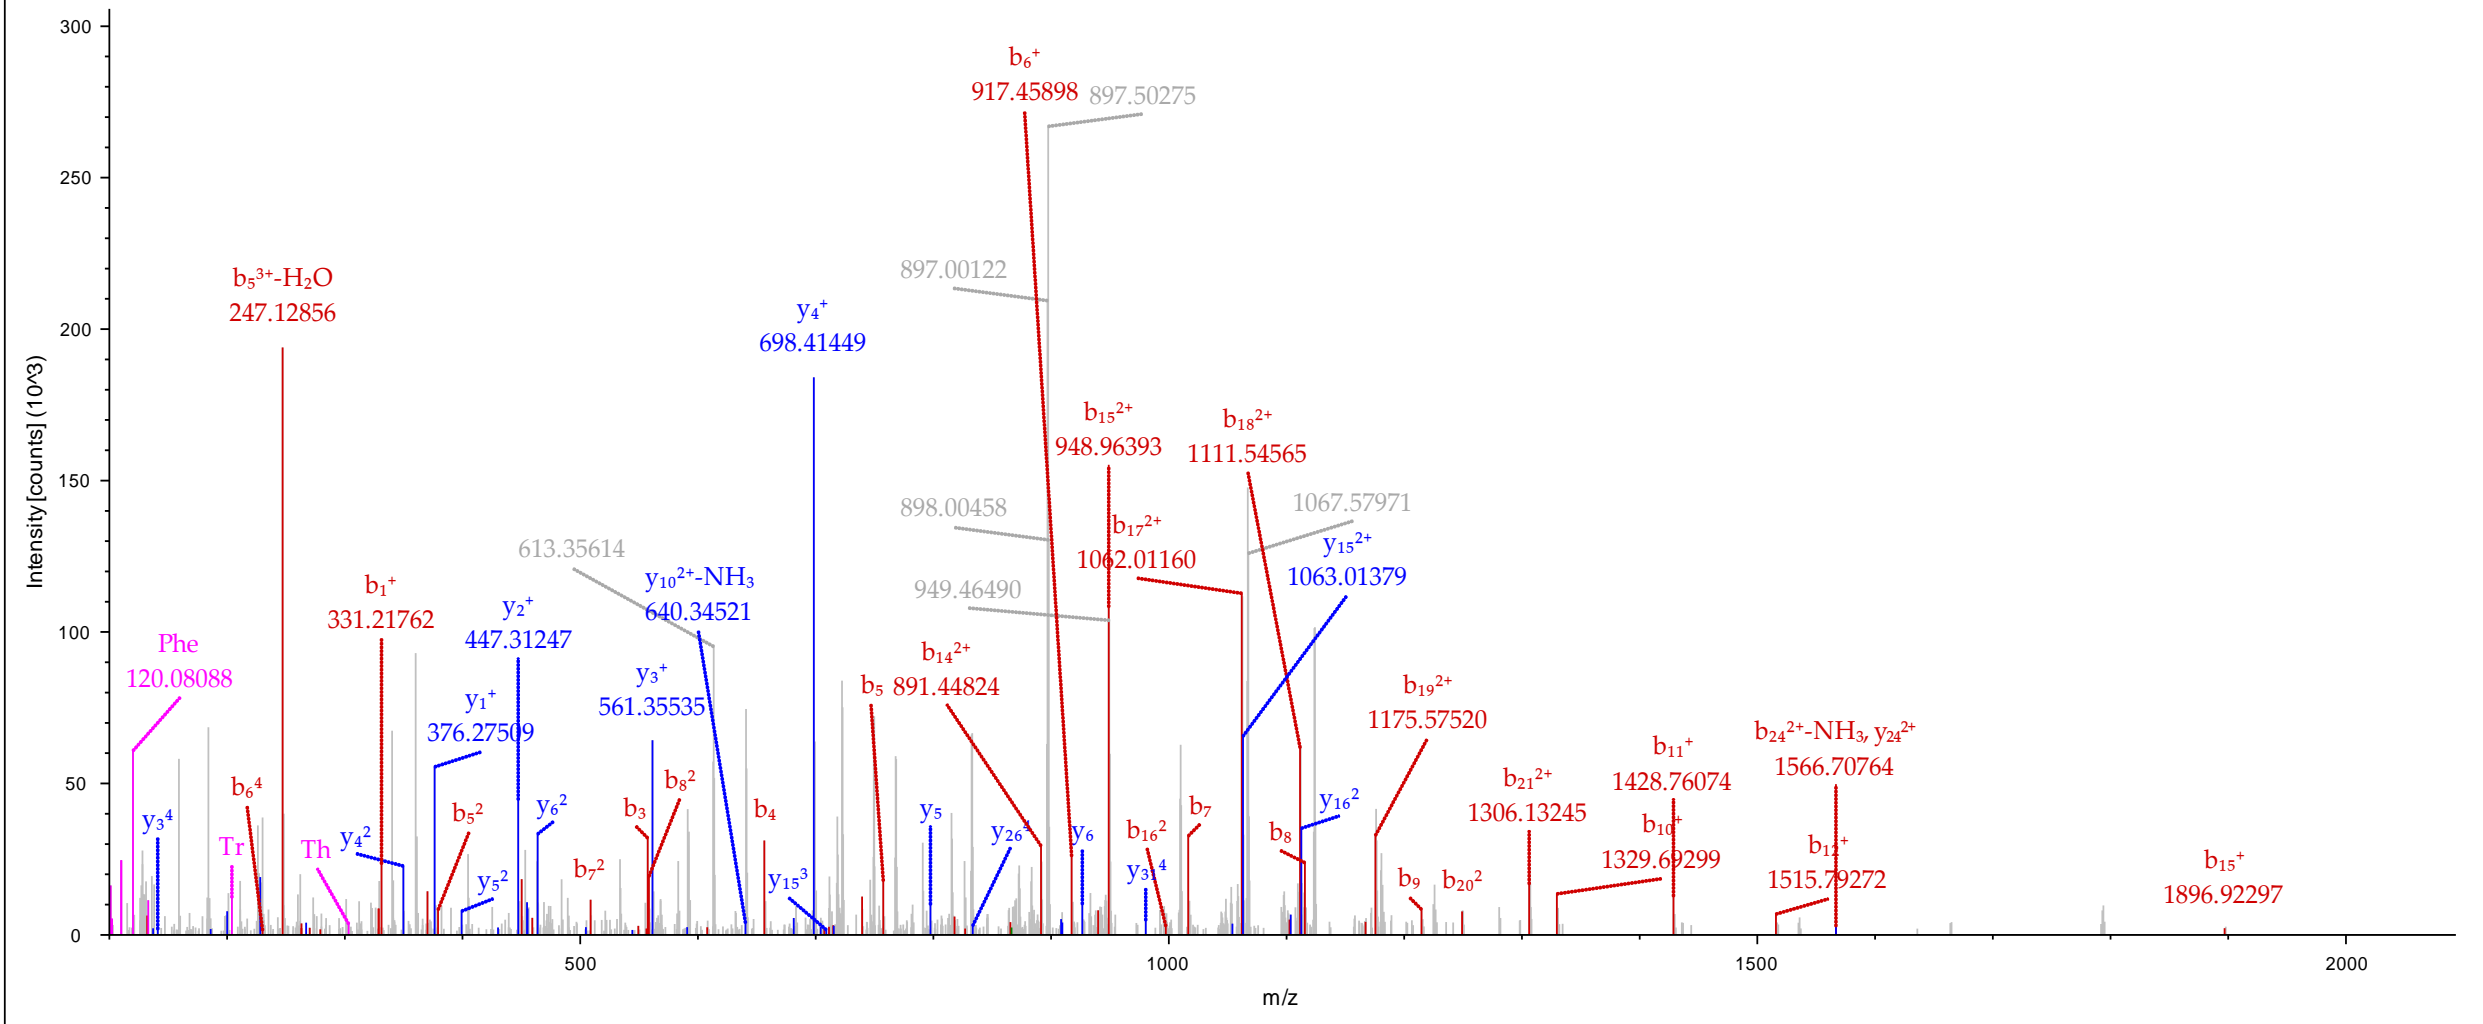

— Pre+H, Precursor, Precursor-H<sub>2</sub>O, Precursor-H<sub>2</sub>O-NH<sub>3</sub>, Precursor-NH<sub>3</sub>, Pre-H  
— y, y-H<sub>2</sub>O, y-NH<sub>3</sub>  
— Immonium  
— b, b-H<sub>2</sub>O, b-NH<sub>3</sub>



| #1 | Immonium  | b <sup>+</sup> | b <sup>2+</sup> | Seq.             | y <sup>+</sup> | y <sup>2+</sup> | #2 |
|----|-----------|----------------|-----------------|------------------|----------------|-----------------|----|
| 1  | 433.23968 | 461.23460      | 231.12094       | W-TMT6plex-Nitro |                |                 | 12 |
| 2  | 181.06077 | 669.28301      | 335.14514       | Y-Nitro          | 1504.75934     | 752.88331       | 11 |
| 3  | 72.08078  | 768.35142      | 384.67935       | V                | 1296.71093     | 648.85910       | 10 |
| 4  | 88.03930  | 883.37836      | 442.19282       | D                | 1197.64252     | 599.32490       | 9  |
| 5  | 30.03383  | 940.39983      | 470.70355       | G                | 1082.61557     | 541.81143       | 8  |
| 6  | 72.08078  | 1039.46824     | 520.23776       | V                | 1025.59411     | 513.30069       | 7  |
| 7  | 102.05496 | 1168.51083     | 584.75906       | E                | 926.52570      | 463.76649       | 6  |
| 8  | 72.08078  | 1267.57925     | 634.29326       | V                | 797.48310      | 399.24519       | 5  |
| 9  | 110.07127 | 1404.63816     | 702.82272       | H                | 698.41469      | 349.71098       | 4  |
| 10 | 87.05529  | 1518.68109     | 759.84418       | N                | 561.35578      | 281.18153       | 3  |
| 11 | 44.04948  | 1589.71820     | 795.36274       | A                | 447.31285      | 224.16006       | 2  |
| 12 | 330.27026 |                |                 | K-TMT6plex       | 376.27574      | 188.64151       | 1  |

JM\_HuMarfanPlasma\_TMT4\_Fr5.raw #43348 RT: 131.5097 min  
FTMS, 983.0002@hcd30.00, z=+2, Mono m/z=983.00024 Da, MH+=1964.99321 Da, Match Tol.=0.02 Da

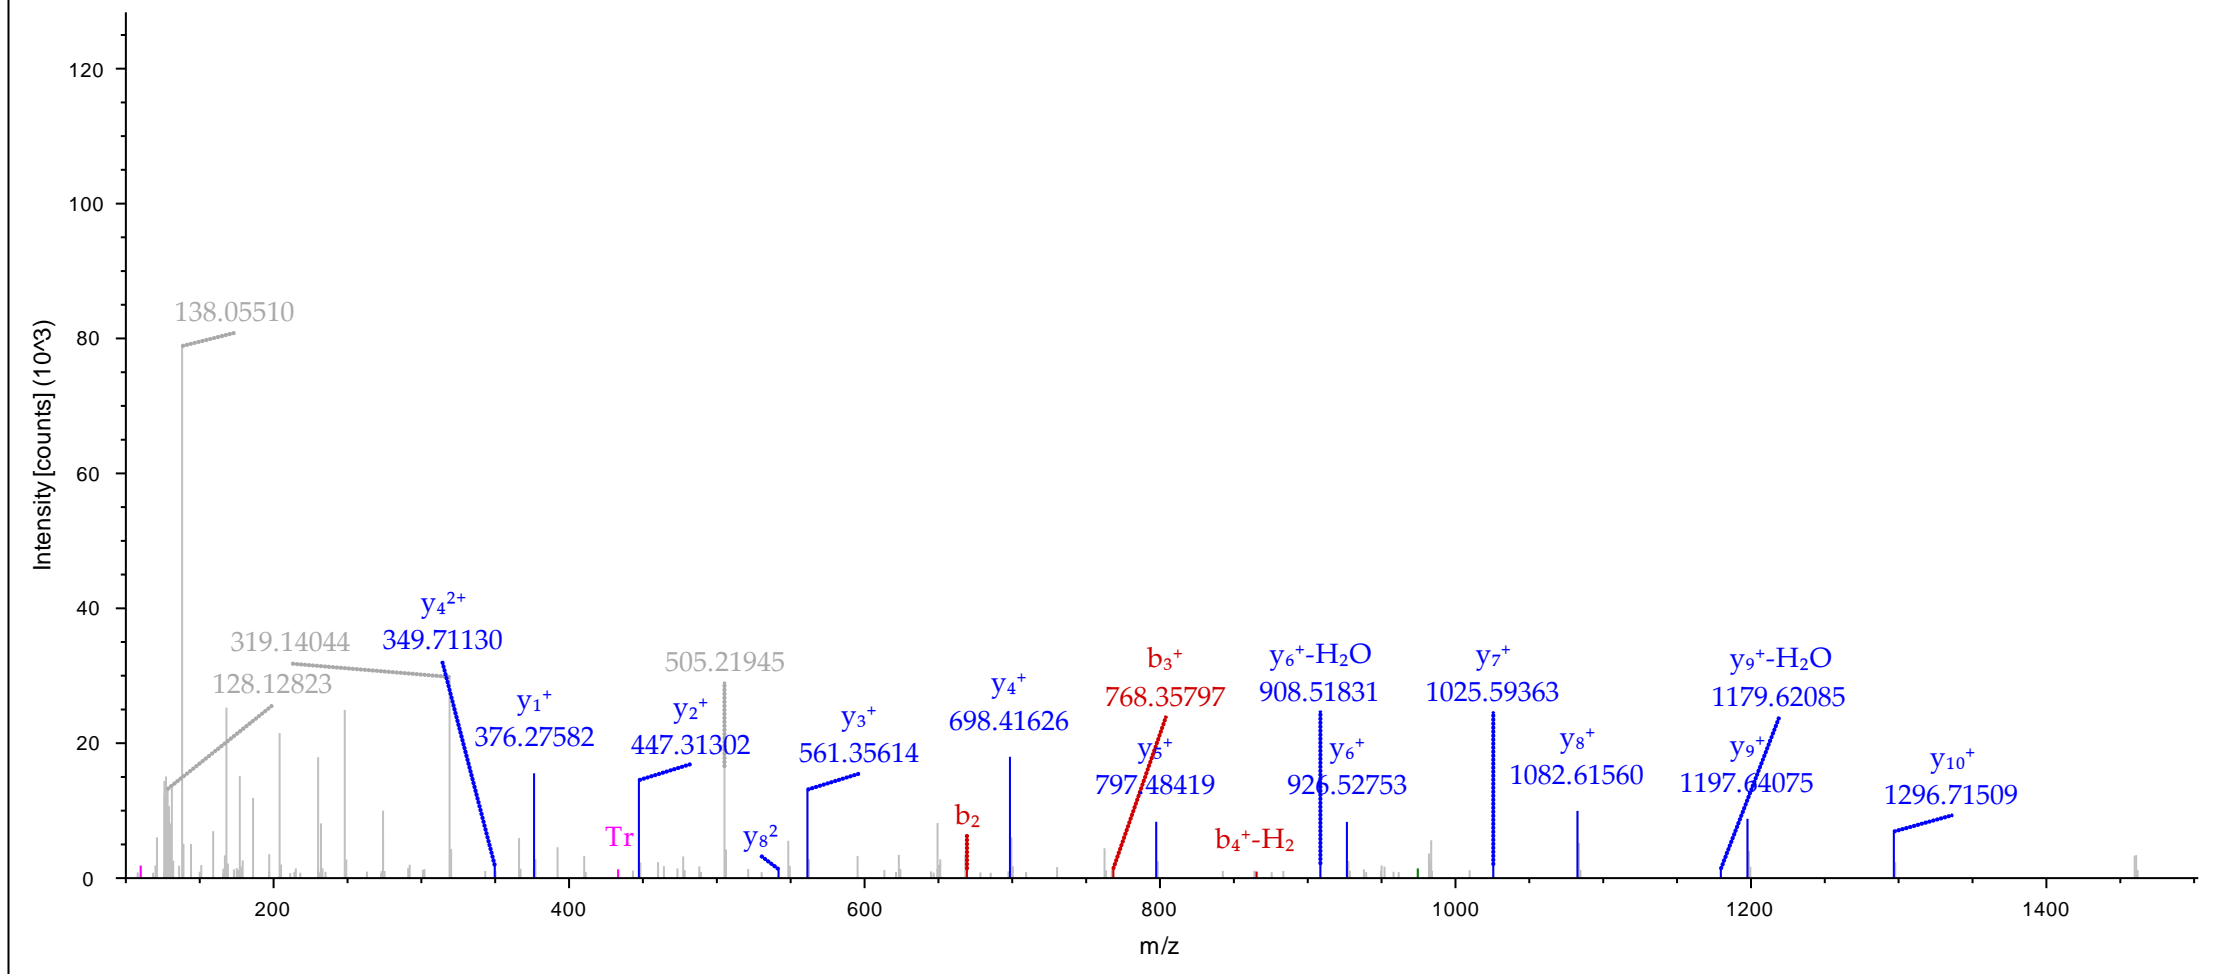

Legend:

- Green line: Pre+H, Precursor, Precursor-H<sub>2</sub>O, Precursor-H<sub>2</sub>O-NH<sub>3</sub>, Precursor-NH<sub>3</sub>, Pre-H
- Blue line: y, y-H<sub>2</sub>O, y-NH<sub>3</sub>
- Pink line: Immonium
- Red line: b, b-H<sub>2</sub>O, b-NH<sub>3</sub>

| #1 | Immonium  | b <sup>+</sup> | b <sup>2+</sup> | b <sup>3+</sup> | b <sup>4+</sup> | Seq.              | y <sup>+</sup> | y <sup>2+</sup> | y <sup>3+</sup> | y <sup>4+</sup> | #2 |
|----|-----------|----------------|-----------------|-----------------|-----------------|-------------------|----------------|-----------------|-----------------|-----------------|----|
| 1  | 303.22297 | 331.21789      | 166.11258       | 111.07748       | 83.55993        | T-TMT6plex        |                |                 |                 |                 | 33 |
| 2  | 70.06513  | 428.27065      | 214.63896       | 143.42840       | 107.82312       | P                 | 4006.86025     | 2003.93377      | 1336.29160      | 1002.47052      | 32 |
| 3  | 102.05496 | 557.31324      | 279.16026       | 186.44260       | 140.08377       | E                 | 3909.80749     | 1955.40738      | 1303.94068      | 978.20733       | 31 |
| 4  | 72.08078  | 656.38166      | 328.69447       | 219.46540       | 164.85087       | V                 | 3780.76490     | 1890.88609      | 1260.92648      | 945.94668       | 30 |
| 5  | 74.06004  | 757.42934      | 379.21831       | 253.14796       | 190.11279       | T                 | 3681.69648     | 1841.35188      | 1227.90368      | 921.17958       | 29 |
| 6  | 133.04301 | 917.45998      | 459.23363       | 306.49151       | 230.12045       | C-Carbamidomethyl | 3580.64881     | 1790.82804      | 1194.22112      | 895.91766       | 28 |
| 7  | 72.08078  | 1016.52840     | 508.76784       | 339.51432       | 254.88756       | V                 | 3420.61816     | 1710.81272      | 1140.87757      | 855.91000       | 27 |
| 8  | 72.08078  | 1115.59681     | 558.30204       | 372.53712       | 279.65466       | V                 | 3321.54974     | 1661.27851      | 1107.85477      | 831.14289       | 26 |
| 9  | 72.08078  | 1214.66523     | 607.83625       | 405.55993       | 304.42176       | V                 | 3222.48133     | 1611.74430      | 1074.83196      | 806.37579       | 25 |
| 10 | 88.03930  | 1329.69217     | 665.34972       | 443.90224       | 333.17850       | D                 | 3123.41292     | 1562.21010      | 1041.80916      | 781.60869       | 24 |
| 11 | 72.08078  | 1428.76058     | 714.88393       | 476.92505       | 357.94560       | V                 | 3008.38597     | 1504.69662      | 1003.46684      | 752.85195       | 23 |
| 12 | 60.04439  | 1515.79261     | 758.39994       | 505.93572       | 379.70361       | S                 | 2909.31756     | 1455.16242      | 970.44404       | 728.08485       | 22 |
| 13 | 101.07094 | 1643.85119     | 822.42923       | 548.62191       | 411.71825       | Q                 | 2822.28553     | 1411.64640      | 941.43336       | 706.32684       | 21 |
| 14 | 102.05496 | 1772.89378     | 886.95053       | 591.63611       | 443.97890       | E                 | 2694.22695     | 1347.61711      | 898.74717       | 674.31220       | 20 |
| 15 | 88.03930  | 1887.92072     | 944.46400       | 629.97843       | 472.73564       | D                 | 2565.18436     | 1283.09582      | 855.73297       | 642.05155       | 19 |
| 16 | 70.06513  | 1984.97349     | 992.99038       | 662.32935       | 496.99883       | P                 | 2450.15742     | 1225.58235      | 817.39066       | 613.29481       | 18 |
| 17 | 102.05496 | 2114.01608     | 1057.51168      | 705.34354       | 529.25948       | E                 | 2353.10465     | 1177.05597      | 785.03974       | 589.03162       | 17 |
| 18 | 72.08078  | 2213.08450     | 1107.04589      | 738.36635       | 554.02658       | V                 | 2224.06206     | 1112.53467      | 742.02554       | 556.77097       | 16 |
| 19 | 101.07094 | 2341.14307     | 1171.07517      | 781.05254       | 586.04123       | Q                 | 2124.99365     | 1063.00046      | 709.00273       | 532.00387       | 15 |
| 20 | 120.08078 | 2488.21149     | 1244.60938      | 830.07535       | 622.80833       | F                 | 1996.93507     | 998.97117       | 666.31654       | 499.98922       | 14 |
| 21 | 87.05529  | 2602.25441     | 1301.63085      | 868.08966       | 651.31906       | N                 | 1849.86666     | 925.43697       | 617.29374       | 463.22212       | 13 |
| 22 | 204.07675 | 2833.31881     | 1417.16304      | 945.11112       | 709.08516       | W-Nitro           | 1735.82373     | 868.41550       | 579.27943       | 434.71139       | 12 |
| 23 | 181.06077 | 3041.36721     | 1521.18724      | 1014.46059      | 761.09726       | Y-Nitro           | 1504.75934     | 752.88331       | 502.25796       | 376.94529       | 11 |
| 24 | 72.08078  | 3140.43563     | 1570.72145      | 1047.48339      | 785.86436       | V                 | 1296.71093     | 648.85910       | 432.90849       | 324.93319       | 10 |
| 25 | 88.03930  | 3255.46257     | 1628.23492      | 1085.82571      | 814.62110       | D                 | 1197.64252     | 599.32490       | 399.88569       | 300.16609       | 9  |
| 26 | 30.03383  | 3312.48403     | 1656.74565      | 1104.83286      | 828.87647       | G                 | 1082.61557     | 541.81143       | 361.54338       | 271.40935       | 8  |
| 27 | 72.08078  | 3411.55245     | 1706.27986      | 1137.85567      | 853.64357       | V                 | 1025.59411     | 513.30069       | 342.53622       | 257.15398       | 7  |
| 28 | 102.05496 | 3540.59504     | 1770.80116      | 1180.86986      | 885.90422       | E                 | 926.52570      | 463.76649       | 309.51342       | 232.38688       | 6  |
| 29 | 72.08078  | 3639.66345     | 1820.33536      | 1213.89267      | 910.67132       | V                 | 797.48310      | 399.24519       | 266.49922       | 200.12623       | 5  |
| 30 | 110.07127 | 3776.72236     | 1888.86482      | 1259.57897      | 944.93605       | H                 | 698.41469      | 349.71098       | 233.47641       | 175.35913       | 4  |
| 31 | 87.05529  | 3890.76529     | 1945.88628      | 1297.59328      | 973.44678       | N                 | 561.35578      | 281.18153       | 187.79011       | 141.09440       | 3  |
| 32 | 44.04948  | 3961.80241     | 1981.40484      | 1321.27232      | 991.20606       | A                 | 447.31285      | 224.16006       | 149.77580       | 112.58367       | 2  |
| 33 | 330.27026 |                |                 |                 |                 | K-TMT6plex        | 376.27574      | 188.64151       | 126.09676       | 94.82439        | 1  |



| #1 | Immonium  | b <sup>+</sup> | b <sup>2+</sup> | b <sup>3+</sup> | b <sup>4+</sup> | b <sup>5+</sup> | Seq.       | y <sup>+</sup> | y <sup>2+</sup> | y <sup>3+</sup> | y <sup>4+</sup> | y <sup>5+</sup> | #2 |
|----|-----------|----------------|-----------------|-----------------|-----------------|-----------------|------------|----------------|-----------------|-----------------|-----------------|-----------------|----|
| 1  | 301.24371 | 329.23862      | 165.12295       | 110.41773       | 83.06511        | 66.65355        | V-TMT6plex |                |                 |                 |                 |                 | 34 |
| 2  | 88.03930  | 444.26557      | 222.63642       | 148.76004       | 111.82185       | 89.65893        | D          | 4023.95186     | 2012.47957      | 1341.98880      | 1006.74342      | 805.59619       | 33 |
| 3  | 87.05529  | 558.30849      | 279.65788       | 186.77435       | 140.33258       | 112.46752       | N          | 3908.92491     | 1954.96609      | 1303.64649      | 977.98669       | 782.59080       | 32 |
| 4  | 44.04948  | 629.34561      | 315.17644       | 210.45339       | 158.09186       | 126.67494       | A          | 3794.88199     | 1897.94463      | 1265.63218      | 949.47595       | 759.78222       | 31 |
| 5  | 86.09643  | 742.42967      | 371.71847       | 248.14807       | 186.36288       | 149.29176       | L          | 3723.84487     | 1862.42607      | 1241.95314      | 931.71668       | 745.57480       | 30 |
| 6  | 101.07094 | 870.48825      | 435.74776       | 290.83427       | 218.37752       | 174.90347       | Q          | 3610.76081     | 1805.88404      | 1204.25845      | 903.44566       | 722.95798       | 29 |
| 7  | 60.04439  | 957.52028      | 479.26378       | 319.84494       | 240.13553       | 192.30988       | S          | 3482.70223     | 1741.85475      | 1161.57226      | 871.43101       | 697.34627       | 28 |
| 8  | 30.03383  | 1014.54174     | 507.77451       | 338.85210       | 254.39089       | 203.71417       | G          | 3395.67020     | 1698.33874      | 1132.56158      | 849.67301       | 679.93986       | 27 |
| 9  | 87.05529  | 1128.58467     | 564.79597       | 376.86641       | 282.90162       | 226.52275       | N          | 3338.64874     | 1669.82801      | 1113.55443      | 835.41764       | 668.53557       | 26 |
| 10 | 60.04439  | 1215.61670     | 608.31199       | 405.87708       | 304.65963       | 243.92916       | S          | 3224.60581     | 1612.80654      | 1075.54012      | 806.90691       | 645.72698       | 25 |
| 11 | 101.07094 | 1343.67527     | 672.34127       | 448.56328       | 336.67428       | 269.54088       | Q          | 3137.57378     | 1569.29053      | 1046.52945      | 785.14890       | 628.32058       | 24 |
| 12 | 102.05496 | 1472.71787     | 736.86257       | 491.57747       | 368.93492       | 295.34939       | E          | 3009.51520     | 1505.26124      | 1003.84325      | 753.13426       | 602.70886       | 23 |
| 13 | 60.04439  | 1559.74989     | 780.37859       | 520.58815       | 390.69293       | 312.75580       | S          | 2880.47261     | 1440.73994      | 960.82906       | 720.87361       | 576.90034       | 22 |
| 14 | 72.08078  | 1658.81831     | 829.91279       | 553.61095       | 415.46003       | 332.56948       | V          | 2793.44058     | 1397.22393      | 931.81838       | 699.11560       | 559.49394       | 21 |
| 15 | 74.06004  | 1759.86599     | 880.43663       | 587.29351       | 440.72195       | 352.77902       | T          | 2694.37217     | 1347.68972      | 898.79557       | 674.34850       | 539.68026       | 20 |
| 16 | 102.05496 | 1888.90858     | 944.95793       | 630.30771       | 472.98260       | 378.58754       | E          | 2593.32449     | 1297.16588      | 865.11301       | 649.08658       | 519.47072       | 19 |
| 17 | 101.07094 | 2016.96716     | 1008.98722      | 672.99390       | 504.99725       | 404.19925       | Q          | 2464.28190     | 1232.64459      | 822.09882       | 616.82593       | 493.66220       | 18 |
| 18 | 88.03930  | 2131.99410     | 1066.50069      | 711.33622       | 533.75398       | 427.20464       | D          | 2336.22332     | 1168.61530      | 779.41262       | 584.81129       | 468.05049       | 17 |
| 19 | 60.04439  | 2219.02613     | 1110.01670      | 740.34689       | 555.51199       | 444.61105       | S          | 2221.19638     | 1111.10183      | 741.07031       | 556.05455       | 445.04510       | 16 |
| 20 | 330.27026 | 2576.28402     | 1288.64565      | 859.43286       | 644.82646       | 516.06263       | K-TMT6plex | 2134.16435     | 1067.58581      | 712.05963       | 534.29654       | 427.63869       | 15 |
| 21 | 88.03930  | 2691.31097     | 1346.15912      | 897.77517       | 673.58320       | 539.06801       | D          | 1776.90645     | 888.95687       | 592.97367       | 444.98207       | 356.18711       | 14 |
| 22 | 60.04439  | 2778.34299     | 1389.67514      | 926.78585       | 695.34121       | 556.47442       | S          | 1661.87951     | 831.44339       | 554.63135       | 416.22534       | 333.18172       | 13 |
| 23 | 74.06004  | 2879.39067     | 1440.19897      | 960.46841       | 720.60313       | 576.68396       | T          | 1574.84748     | 787.92738       | 525.62068       | 394.46733       | 315.77532       | 12 |
| 24 | 181.06077 | 3087.43908     | 1544.22318      | 1029.81788      | 772.61523       | 618.29364       | Y-Nitro    | 1473.79980     | 737.40354       | 491.93812       | 369.20541       | 295.56578       | 11 |
| 25 | 60.04439  | 3174.47111     | 1587.73919      | 1058.82855      | 794.37323       | 635.70004       | S          | 1265.75140     | 633.37934       | 422.58865       | 317.19331       | 253.95610       | 10 |
| 26 | 86.09643  | 3287.55517     | 1644.28122      | 1096.52324      | 822.64425       | 658.31686       | L          | 1178.71937     | 589.86332       | 393.57797       | 295.43530       | 236.54970       | 9  |
| 27 | 60.04439  | 3374.58720     | 1687.79724      | 1125.53392      | 844.40226       | 675.72326       | S          | 1065.63531     | 533.32129       | 355.88329       | 267.16428       | 213.93288       | 8  |
| 28 | 60.04439  | 3461.61923     | 1731.31325      | 1154.54459      | 866.16026       | 693.12967       | S          | 978.60328      | 489.80528       | 326.87261       | 245.40628       | 196.52648       | 7  |
| 29 | 74.06004  | 3562.66691     | 1781.83709      | 1188.22715      | 891.42218       | 713.33920       | T          | 891.57125      | 446.28926       | 297.86193       | 223.64827       | 179.12007       | 6  |
| 30 | 86.09643  | 3675.75097     | 1838.37912      | 1225.92184      | 919.69320       | 735.95602       | L          | 790.52357      | 395.76542       | 264.17937       | 198.38635       | 158.91054       | 5  |
| 31 | 74.06004  | 3776.79865     | 1888.90296      | 1259.60440      | 944.95512       | 756.16555       | T          | 677.43951      | 339.22339       | 226.48469       | 170.11533       | 136.29372       | 4  |
| 32 | 86.09643  | 3889.88271     | 1945.44499      | 1297.29909      | 973.22614       | 778.78236       | L          | 576.39183      | 288.69955       | 192.80213       | 144.85341       | 116.08419       | 3  |
| 33 | 60.04439  | 3976.91474     | 1988.96101      | 1326.30976      | 994.98414       | 796.18877       | S          | 463.30776      | 232.15752       | 155.10744       | 116.58240       | 93.46737        | 2  |
| 34 | 330.27026 |                |                 |                 |                 |                 | K-TMT6plex | 376.27574      | 188.64151       | 126.09676       | 94.82439        | 76.06097        | 1  |

JM\_HuMarfanPlasma\_TMT4\_Fr3.raw #22619 RT: 70.8262 min  
 FTMS, 871.2361@hcd30.00, z=+5, Mono m/z=871.23608 Da, MH+=4352.15131 Da, Match Tol.=0.02 Da

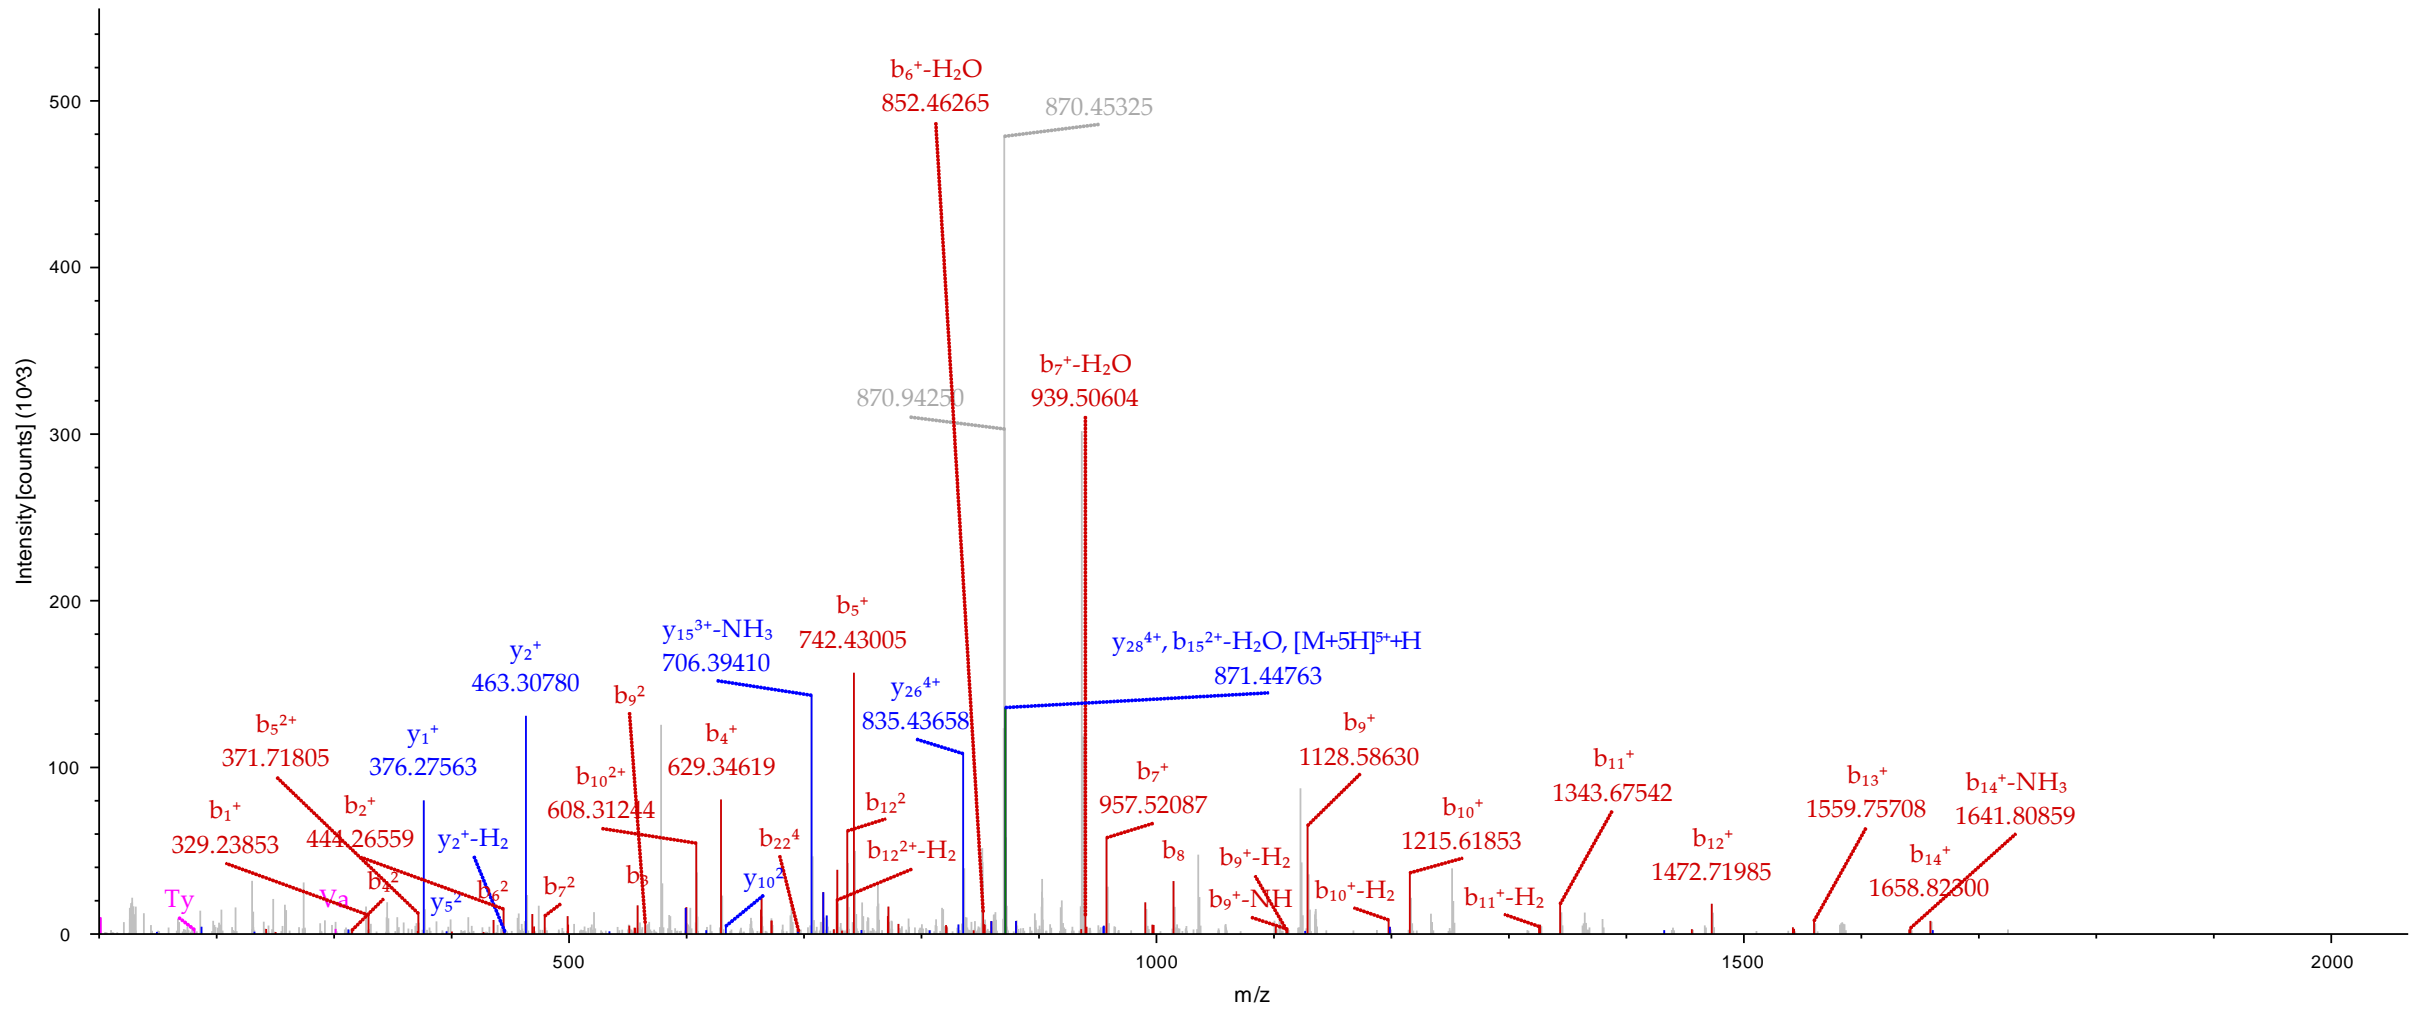

— Pre+H, Precursor, Precursor-H<sub>2</sub>O, Precursor-H<sub>2</sub>O-NH<sub>3</sub>, Precursor-NH<sub>3</sub>, Pre-H    
 — Immonium  
— y, y-H<sub>2</sub>O, y-NH<sub>3</sub>    
 — b, b-H<sub>2</sub>O, b-NH<sub>3</sub>

| #1 | Immonium  | b <sup>+</sup> | b <sup>2+</sup> | b <sup>3+</sup> | Seq.              | y <sup>+</sup> | y <sup>2+</sup> | y <sup>3+</sup> | #2 |
|----|-----------|----------------|-----------------|-----------------|-------------------|----------------|-----------------|-----------------|----|
| 1  | 289.20732 | 317.20224      | 159.10476       | 106.40560       | S-TMT6plex        |                |                 |                 | 16 |
| 2  | 30.03383  | 374.22370      | 187.61549       | 125.41275       | G                 | 1756.83229     | 878.91979       | 586.28228       | 15 |
| 3  | 74.06004  | 475.27138      | 238.13933       | 159.09531       | T                 | 1699.81083     | 850.40905       | 567.27513       | 14 |
| 4  | 44.04948  | 546.30849      | 273.65788       | 182.77435       | A                 | 1598.76315     | 799.88521       | 533.59257       | 13 |
| 5  | 60.04439  | 633.34052      | 317.17390       | 211.78502       | S                 | 1527.72604     | 764.36666       | 509.91353       | 12 |
| 6  | 72.08078  | 732.40894      | 366.70811       | 244.80783       | V                 | 1440.69401     | 720.85064       | 480.90285       | 11 |
| 7  | 72.08078  | 831.47735      | 416.24231       | 277.83063       | V                 | 1341.62560     | 671.31644       | 447.88005       | 10 |
| 8  | 133.04301 | 991.50800      | 496.25764       | 331.17418       | C-Carbamidomethyl | 1242.55718     | 621.78223       | 414.85725       | 9  |
| 9  | 86.09643  | 1104.59206     | 552.79967       | 368.86887       | L                 | 1082.52653     | 541.76691       | 361.51370       | 8  |
| 10 | 86.09643  | 1217.67613     | 609.34170       | 406.56356       | L                 | 969.44247      | 485.22487       | 323.81901       | 7  |
| 11 | 88.03930  | 1332.70307     | 666.85517       | 444.90587       | D                 | 856.35841      | 428.68284       | 286.12432       | 6  |
| 12 | 87.05529  | 1446.74600     | 723.87664       | 482.92018       | N                 | 741.33146      | 371.16937       | 247.78201       | 5  |
| 13 | 120.08078 | 1593.81441     | 797.41084       | 531.94299       | F                 | 627.28854      | 314.14791       | 209.76770       | 4  |
| 14 | 181.06077 | 1801.86282     | 901.43505       | 601.29246       | Y-Nitro           | 480.22012      | 240.61370       | 160.74489       | 3  |
| 15 | 70.06513  | 1898.91558     | 949.96143       | 633.64338       | P                 | 272.17172      | 136.58950       | 91.39542        | 2  |
| 16 | 129.11347 |                |                 |                 | R                 | 175.11895      | 88.06311        | 59.04450        | 1  |

JM\_HuMarfanPlasma\_TMT1.raw #123303 RT: 341.0945 min  
 FTMS, 692.3536@hcd30.00, z=+3, Mono m/z=692.01843 Da, MH+=2074.04074 Da, Match Tol.=0.02 Da

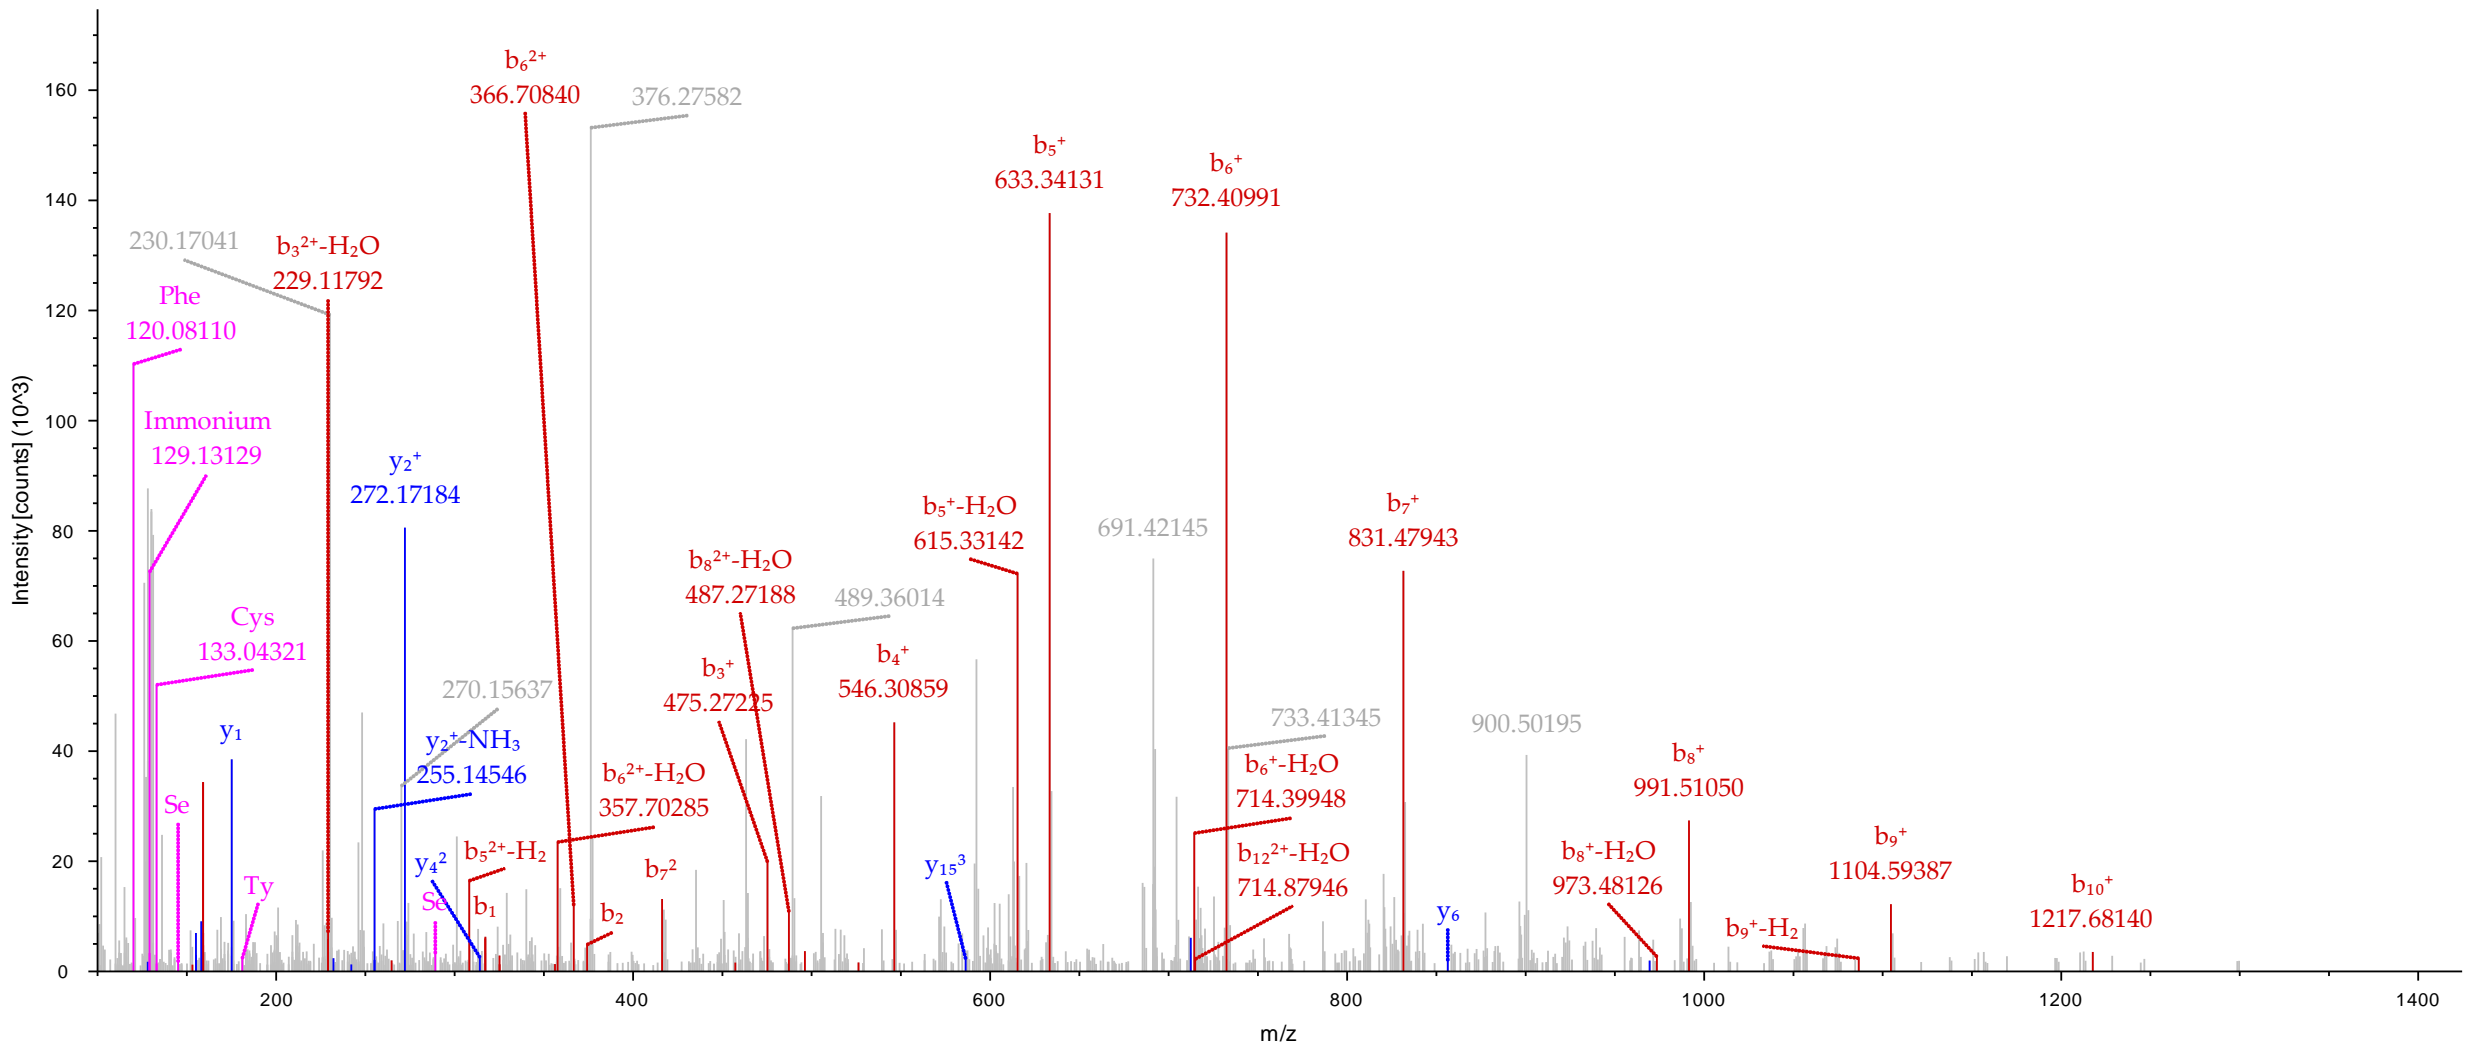

— Pre+H, Precursor, Precursor-H<sub>2</sub>O, Precursor-H<sub>2</sub>O-NH<sub>3</sub>, Precursor-NH<sub>3</sub>, Pre-H  
— y, y-H<sub>2</sub>O, y-NH<sub>3</sub>  
— Immonium  
— b, b-H<sub>2</sub>O, b-NH<sub>3</sub>



| #1 | Immonium  | b <sup>+</sup> | b <sup>2+</sup> | Seq.       | y <sup>+</sup> | y <sup>2+</sup> | #2 |
|----|-----------|----------------|-----------------|------------|----------------|-----------------|----|
| 1  | 315.25936 | 343.25427      | 172.13077       | L-TMT6plex |                |                 | 16 |
| 2  | 86.09643  | 456.33834      | 228.67281       | L          | 1607.83876     | 804.42302       | 15 |
| 3  | 86.09643  | 569.42240      | 285.21484       | I          | 1494.75470     | 747.88099       | 14 |
| 4  | 181.06077 | 777.47081      | 389.23904       | Y-Nitro    | 1381.67063     | 691.33895       | 13 |
| 5  | 44.04948  | 848.50792      | 424.75760       | A          | 1173.62223     | 587.31475       | 12 |
| 6  | 44.04948  | 919.54503      | 460.27616       | A          | 1102.58511     | 551.79619       | 11 |
| 7  | 60.04439  | 1006.57706     | 503.79217       | S          | 1031.54800     | 516.27764       | 10 |
| 8  | 74.06004  | 1107.62474     | 554.31601       | T          | 944.51597      | 472.76162       | 9  |
| 9  | 86.09643  | 1220.70881     | 610.85804       | L          | 843.46829      | 422.23778       | 8  |
| 10 | 101.07094 | 1348.76738     | 674.88733       | Q          | 730.38423      | 365.69575       | 7  |
| 11 | 60.04439  | 1435.79941     | 718.40334       | S          | 602.32565      | 301.66646       | 6  |
| 12 | 30.03383  | 1492.82087     | 746.91408       | G          | 515.29362      | 258.15045       | 5  |
| 13 | 72.08078  | 1591.88929     | 796.44828       | V          | 458.27216      | 229.63972       | 4  |
| 14 | 70.06513  | 1688.94205     | 844.97466       | P          | 359.20374      | 180.10551       | 3  |
| 15 | 60.04439  | 1775.97408     | 888.49068       | S          | 262.15098      | 131.57913       | 2  |
| 16 | 129.11347 |                |                 | R          | 175.11895      | 88.06311        | 1  |

Nitro-Tyr immonium ion is detected in MS/MS spectra and added brown colored in the following spectrum

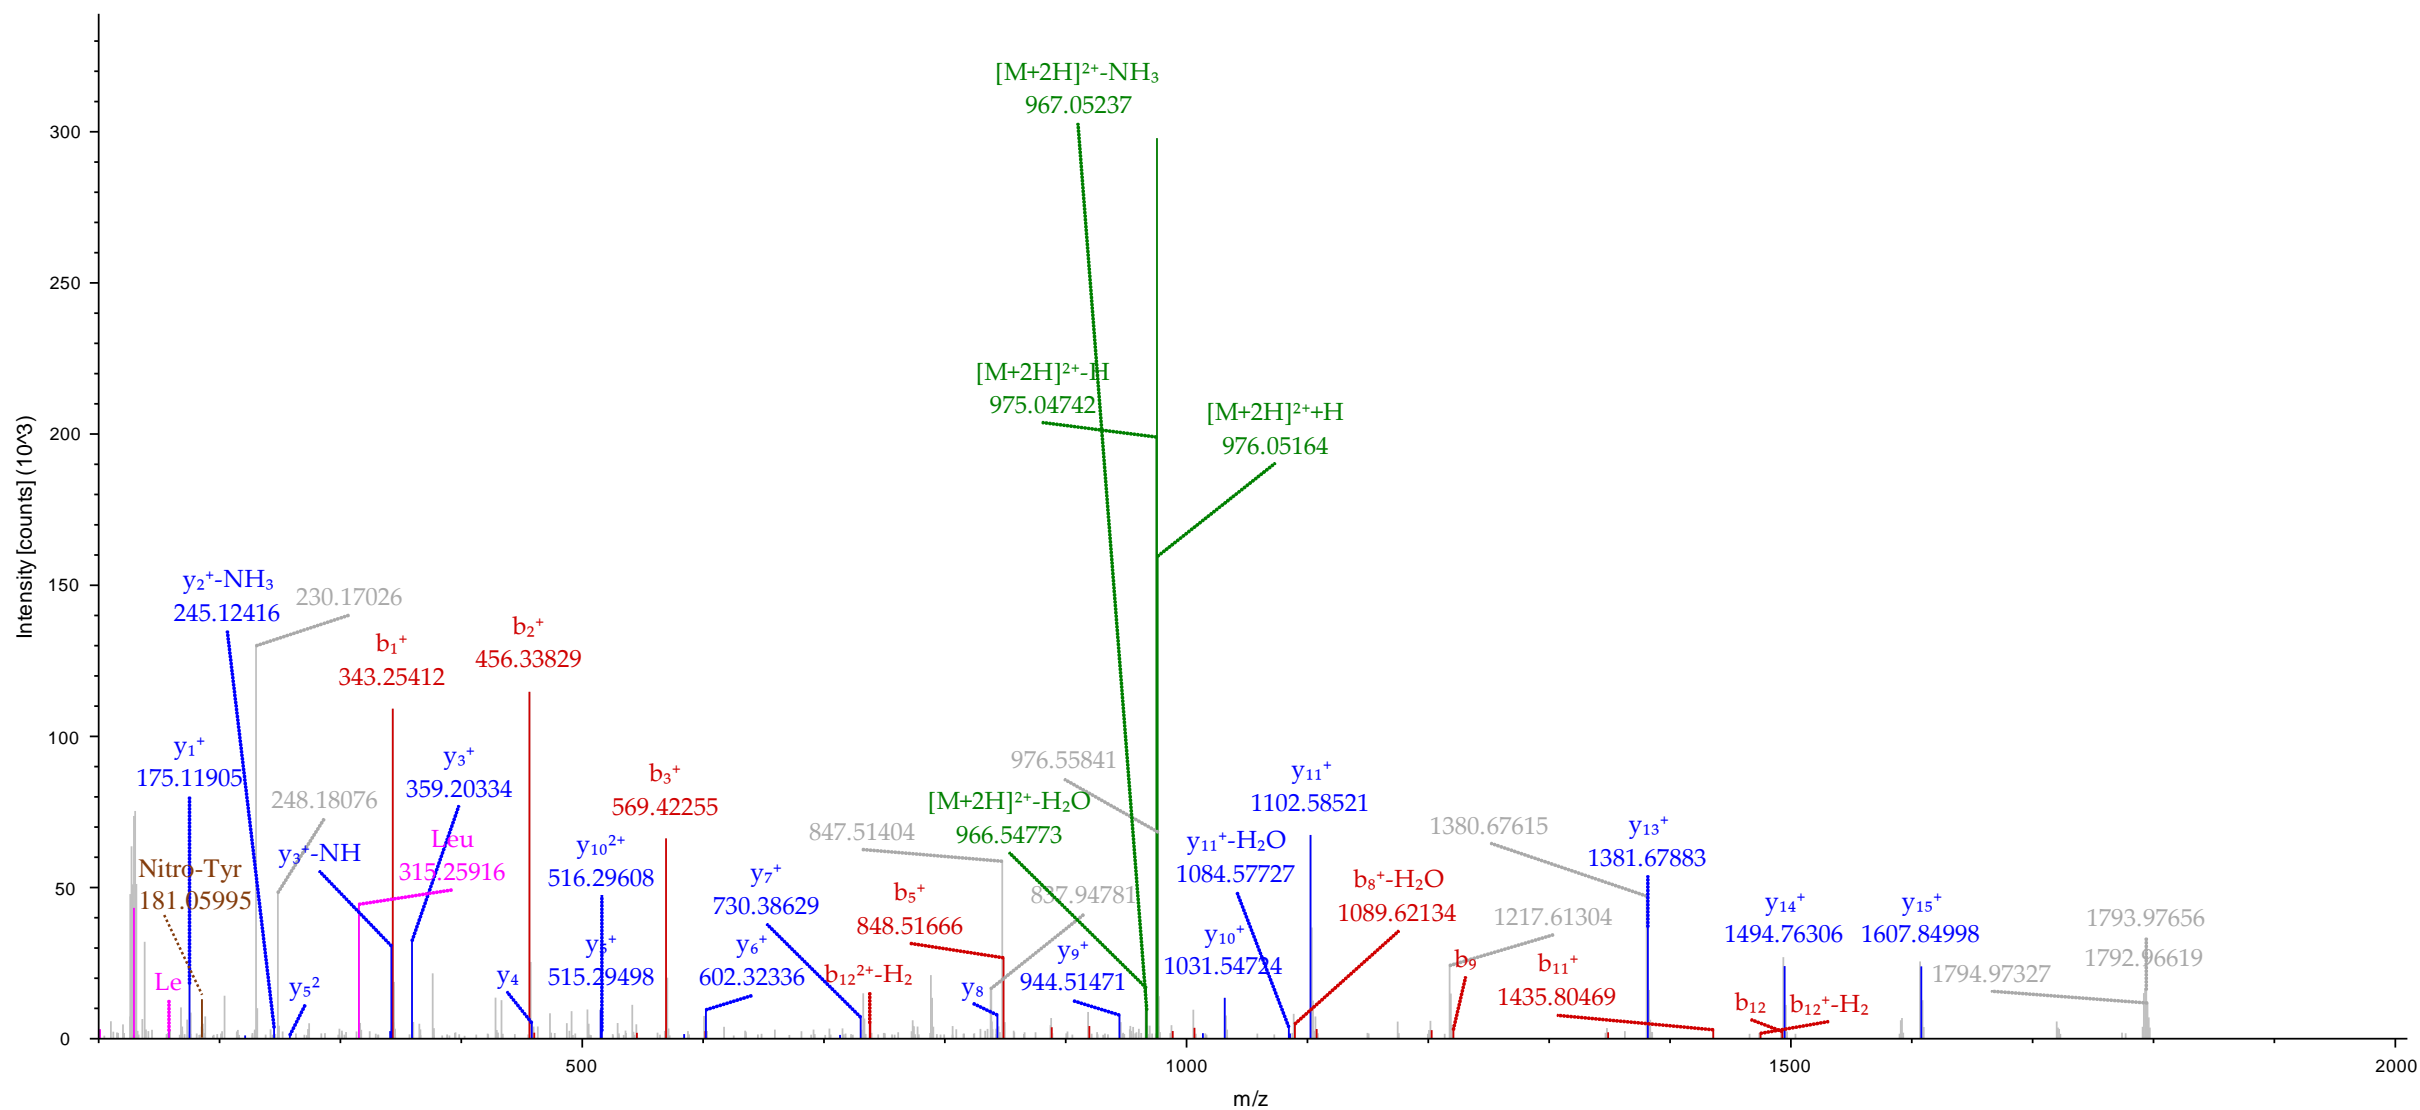

— Pre+H, Precursor, Precursor-H<sub>2</sub>O, Precursor-H<sub>2</sub>O-NH<sub>3</sub>, Precursor-NH<sub>3</sub>, Pre-H  
— y, y-H<sub>2</sub>O, y-NH<sub>3</sub>  
— Immonium  
— b, b-H<sub>2</sub>O, b-NH<sub>3</sub>

| #1 | Immonium  | b <sup>+</sup> | b <sup>2+</sup> | b <sup>3+</sup> | b <sup>4+</sup> | Seq.       | y <sup>+</sup> | y <sup>2+</sup> | y <sup>3+</sup> | y <sup>4+</sup> | #2 |
|----|-----------|----------------|-----------------|-----------------|-----------------|------------|----------------|-----------------|-----------------|-----------------|----|
| 1  | 303.22297 | 331.21789      | 166.11258       | 111.07748       | 83.55993        | T-TMT6plex |                |                 |                 |                 | 16 |
| 2  | 136.07569 | 494.28122      | 247.64425       | 165.43192       | 124.32576       | Y          | 2439.28614     | 1220.14671      | 813.76690       | 610.57699       | 15 |
| 3  | 86.09643  | 607.36528      | 304.18628       | 203.12661       | 152.59678       | I          | 2276.22281     | 1138.61504      | 759.41245       | 569.81116       | 14 |
| 4  | 120.08078 | 754.43369      | 377.72048       | 252.14942       | 189.36388       | F          | 2163.13874     | 1082.07301      | 721.71777       | 541.54014       | 13 |
| 5  | 44.04948  | 825.47081      | 413.23904       | 275.82845       | 207.12316       | A          | 2016.07033     | 1008.53880      | 672.69496       | 504.77304       | 12 |
| 6  | 30.03383  | 882.49227      | 441.74977       | 294.83561       | 221.37853       | G          | 1945.03322     | 973.02025       | 649.01592       | 487.01376       | 11 |
| 7  | 88.03930  | 997.51921      | 499.26325       | 333.17792       | 250.13526       | D          | 1888.01175     | 944.50951       | 630.00877       | 472.75840       | 10 |
| 8  | 330.27026 | 1354.77711     | 677.89219       | 452.26389       | 339.44973       | K-TMT6plex | 1772.98481     | 886.99604       | 591.66645       | 444.00166       | 9  |
| 9  | 120.08078 | 1501.84552     | 751.42640       | 501.28669       | 376.21684       | F          | 1415.72691     | 708.36710       | 472.58049       | 354.68719       | 8  |
| 10 | 159.09167 | 1687.92484     | 844.46606       | 563.31313       | 422.73667       | W          | 1268.65850     | 634.83289       | 423.55768       | 317.92008       | 7  |
| 11 | 129.11347 | 1844.02595     | 922.51661       | 615.34683       | 461.76194       | R          | 1082.57919     | 541.79323       | 361.53125       | 271.40025       | 6  |
| 12 | 181.06077 | 2052.07435     | 1026.54081      | 684.69630       | 513.77405       | Y-Nitro    | 926.47808      | 463.74268       | 309.49754       | 232.37498       | 5  |
| 13 | 87.05529  | 2166.11728     | 1083.56228      | 722.71061       | 542.28478       | N          | 718.42967      | 359.71847       | 240.14807       | 180.36288       | 4  |
| 14 | 102.05496 | 2295.15987     | 1148.08357      | 765.72481       | 574.54543       | E          | 604.38674      | 302.69701       | 202.13377       | 151.85214       | 3  |
| 15 | 72.08078  | 2394.22829     | 1197.61778      | 798.74761       | 599.31253       | V          | 475.34415      | 238.17571       | 159.11957       | 119.59150       | 2  |
| 16 | 330.27026 |                |                 |                 |                 | K-TMT6plex | 376.27574      | 188.64151       | 126.09676       | 94.82439        | 1  |

Nitro-Tyr immonium ion is detected in MS/MS spectra and added brown colored in the following spectrum

JM\_HuMarfanPlasma\_TMT3\_Fr3.raw #39173 RT: 116.2183 min  
 FTMS, 924.1727@hcd30.00, z=+3, Mono m/z=923.83881 Da, MH+=2769.50187 Da, Match Tol.=0.02 Da

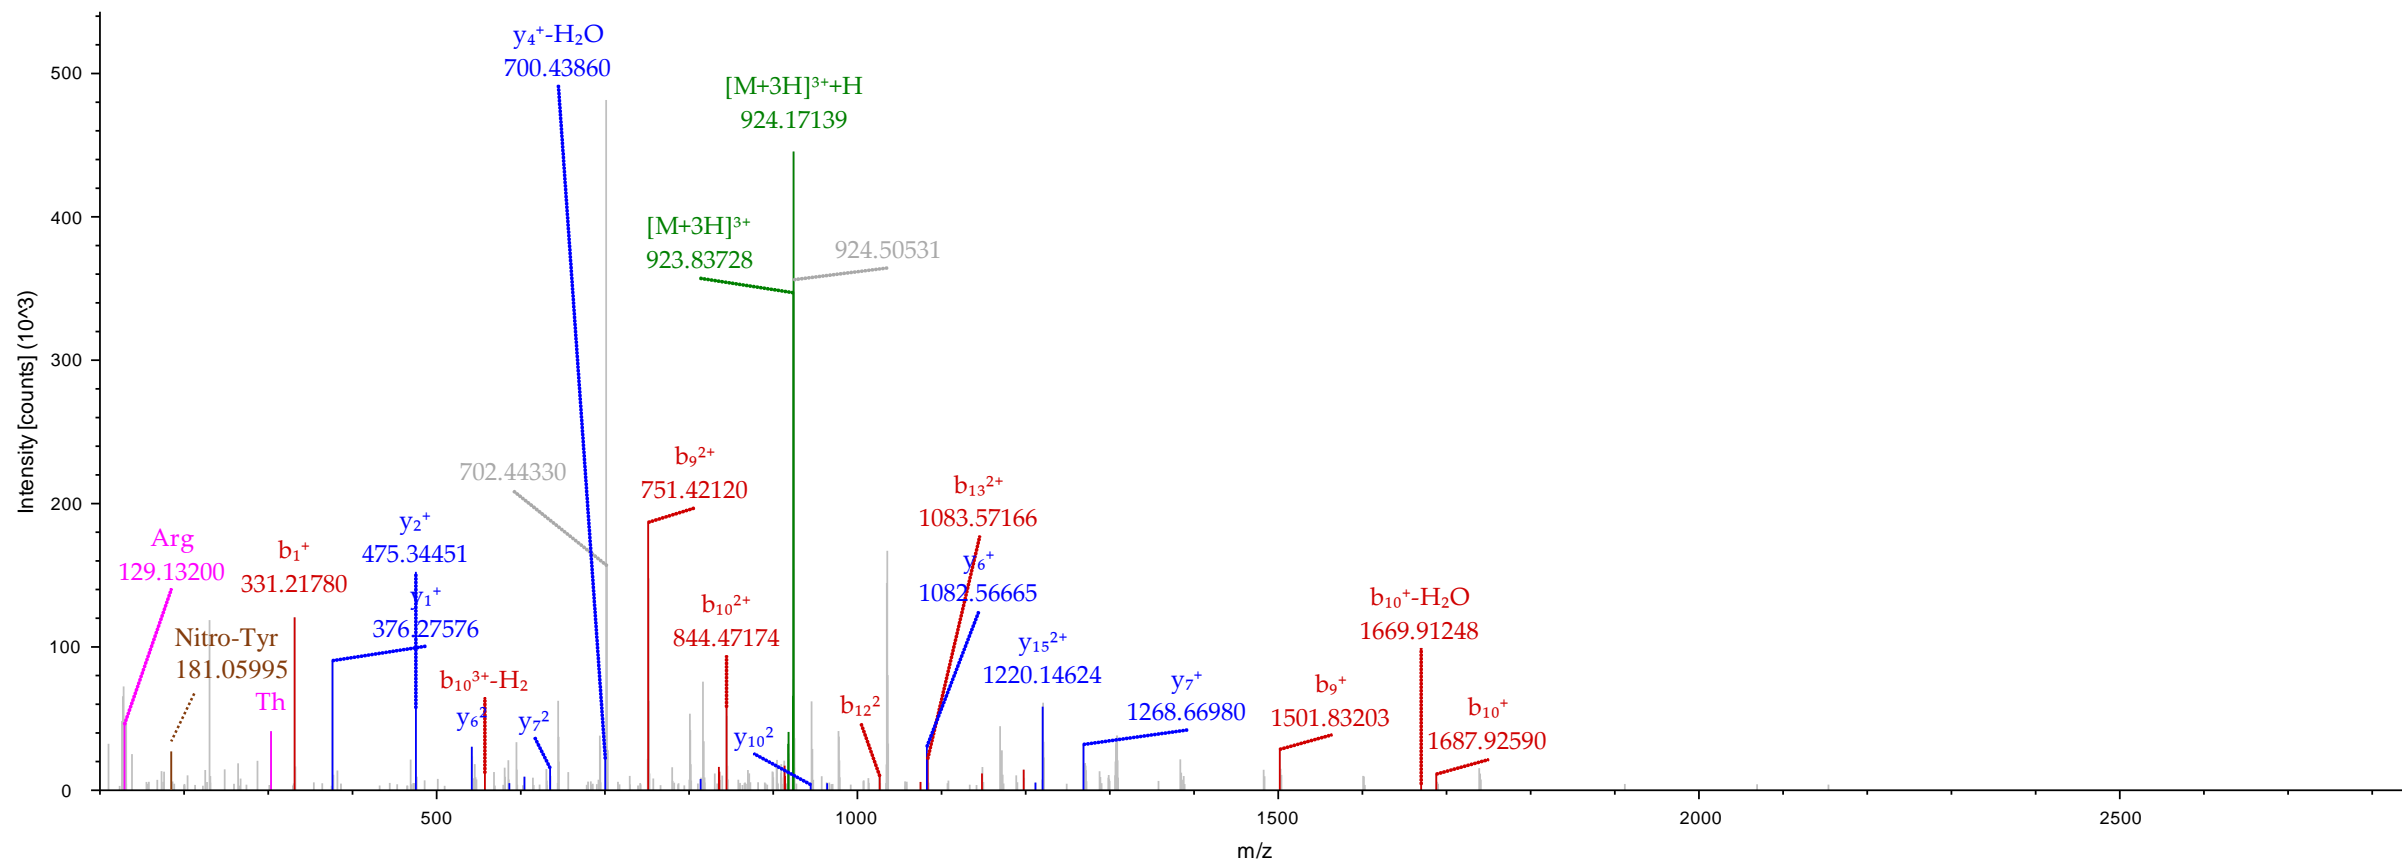

— Pre+H, Precursor, Precursor- $H_2O$ , Precursor- $H_2O-NH_3$ , Precursor- $NH_3$ , Pre-H  
— y, y- $H_2O$ , y- $NH_3$   
— Immonium  
— b, b- $H_2O$ , b- $NH_3$

| #1 | Immonium  | b <sup>+</sup> | b <sup>2+</sup> | Seq.       | y <sup>+</sup> | y <sup>2+</sup> | #2 |
|----|-----------|----------------|-----------------|------------|----------------|-----------------|----|
| 1  | 289.20732 | 317.20224      | 159.10476       | S-TMT6plex |                |                 | 11 |
| 2  | 44.04948  | 388.23935      | 194.62331       | A          | 1436.72189     | 718.86458       | 10 |
| 3  | 60.04439  | 475.27138      | 238.13933       | S          | 1365.68478     | 683.34603       | 9  |
| 4  | 88.03930  | 590.29832      | 295.65280       | D          | 1278.65275     | 639.83001       | 8  |
| 5  | 86.09643  | 703.38239      | 352.19483       | L          | 1163.62580     | 582.31654       | 7  |
| 6  | 74.06004  | 804.43006      | 402.71867       | T          | 1050.54174     | 525.77451       | 6  |
| 7  | 204.07675 | 1035.49446     | 518.25087       | W-Nitro    | 949.49406      | 475.25067       | 5  |
| 8  | 88.03930  | 1150.52140     | 575.76434       | D          | 718.42967      | 359.71847       | 4  |
| 9  | 87.05529  | 1264.56433     | 632.78580       | N          | 603.40273      | 302.20500       | 3  |
| 10 | 86.09643  | 1377.64839     | 689.32783       | L          | 489.35980      | 245.18354       | 2  |
| 11 | 330.27026 |                |                 | K-TMT6plex | 376.27574      | 188.64151       | 1  |

JM\_HuMarfanPlasma\_TMT2\_Fr3.raw #28844 RT: 88.1481 min  
 FTMS, 876.9673@hcd30.00, z=+2, Mono m/z=876.96729 Da, MH+=1752.92729 Da, Match Tol.=0.02 Da

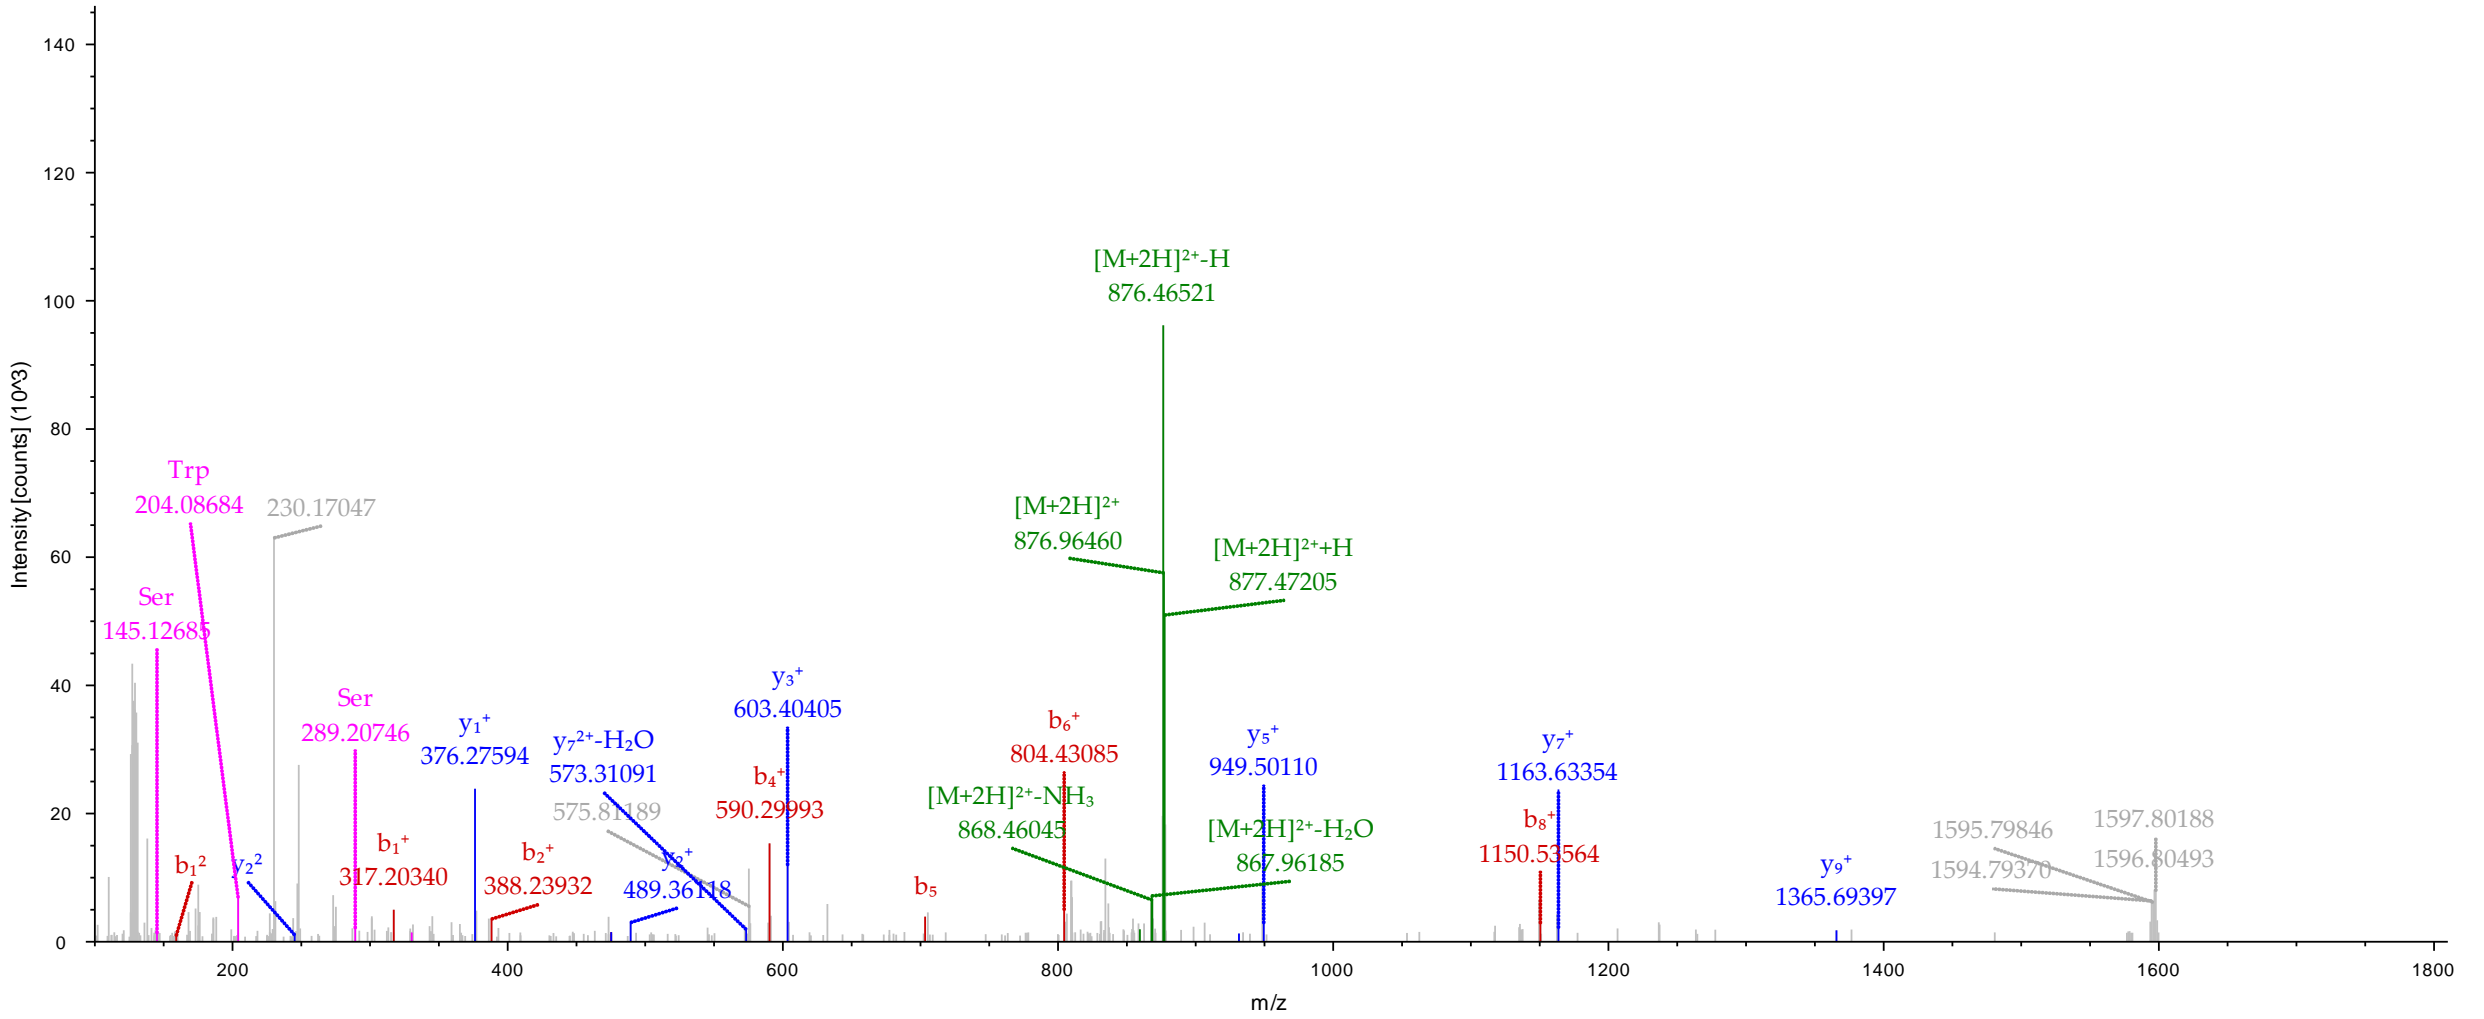

— Pre+H, Precursor, Precursor-H<sub>2</sub>O, Precursor-H<sub>2</sub>O-NH<sub>3</sub>, Precursor-NH<sub>3</sub>, Pre-H  
— y, y-H<sub>2</sub>O, y-NH<sub>3</sub>  
— Immonium  
— b, b-H<sub>2</sub>O, b-NH<sub>3</sub>

| #1 | Immonium  | b <sup>+</sup> | b <sup>2+</sup> | b <sup>3+</sup> | Seq.              | y <sup>+</sup> | y <sup>2+</sup> | y <sup>3+</sup> | #2 |
|----|-----------|----------------|-----------------|-----------------|-------------------|----------------|-----------------|-----------------|----|
| 1  | 289.20732 | 317.20224      | 159.10476       | 106.40560       | S-TMT6plex        |                |                 |                 | 19 |
| 2  | 44.04948  | 388.23935      | 194.62331       | 130.08463       | A                 | 2129.04844     | 1065.02786      | 710.35433       | 18 |
| 3  | 30.03383  | 445.26081      | 223.13405       | 149.09179       | G                 | 2058.01132     | 1029.50930      | 686.67529       | 17 |
| 4  | 204.07675 | 676.32521      | 338.66624       | 226.11325       | W-Nitro           | 2000.98986     | 1000.99857      | 667.66814       | 16 |
| 5  | 87.05529  | 790.36813      | 395.68770       | 264.12756       | N                 | 1769.92547     | 885.46637       | 590.64667       | 15 |
| 6  | 86.09643  | 903.45220      | 452.22974       | 301.82225       | I                 | 1655.88254     | 828.44491       | 552.63236       | 14 |
| 7  | 70.06513  | 1000.50496     | 500.75612       | 334.17317       | P                 | 1542.79848     | 771.90288       | 514.93768       | 13 |
| 8  | 86.09643  | 1113.58902     | 557.29815       | 371.86786       | I                 | 1445.74571     | 723.37649       | 482.58676       | 12 |
| 9  | 30.03383  | 1170.61049     | 585.80888       | 390.87501       | G                 | 1332.66165     | 666.83446       | 444.89207       | 11 |
| 10 | 86.09643  | 1283.69455     | 642.35091       | 428.56970       | L                 | 1275.64018     | 638.32373       | 425.88491       | 10 |
| 11 | 86.09643  | 1396.77862     | 698.89295       | 466.26439       | L                 | 1162.55612     | 581.78170       | 388.19022       | 9  |
| 12 | 136.07569 | 1559.84194     | 780.42461       | 520.61883       | Y                 | 1049.47206     | 525.23967       | 350.49554       | 8  |
| 13 | 133.04301 | 1719.87259     | 860.43993       | 573.96238       | C-Carbamidomethyl | 886.40873      | 443.70800       | 296.14109       | 7  |
| 14 | 88.03930  | 1834.89954     | 917.95341       | 612.30470       | D                 | 726.37808      | 363.69268       | 242.79754       | 6  |
| 15 | 86.09643  | 1947.98360     | 974.49544       | 649.99938       | L                 | 611.35114      | 306.17921       | 204.45523       | 5  |
| 16 | 70.06513  | 2045.03636     | 1023.02182      | 682.35031       | P                 | 498.26707      | 249.63717       | 166.76054       | 4  |
| 17 | 102.05496 | 2174.07896     | 1087.54312      | 725.36450       | E                 | 401.21431      | 201.11079       | 134.40962       | 3  |
| 18 | 70.06513  | 2271.13172     | 1136.06950      | 757.71542       | P                 | 272.17172      | 136.58950       | 91.39542        | 2  |
| 19 | 129.11347 |                |                 |                 | R                 | 175.11895      | 88.06311        | 59.04450        | 1  |

JM\_HuMarfanPlasma\_TMT2.raw #102586 RT: 282.4807 min  
 FTMS, 815.7576@hcd30.00, z=+3, Mono m/z=815.42474 Da, MH+=2444.25968 Da, Match Tol.=0.02 Da

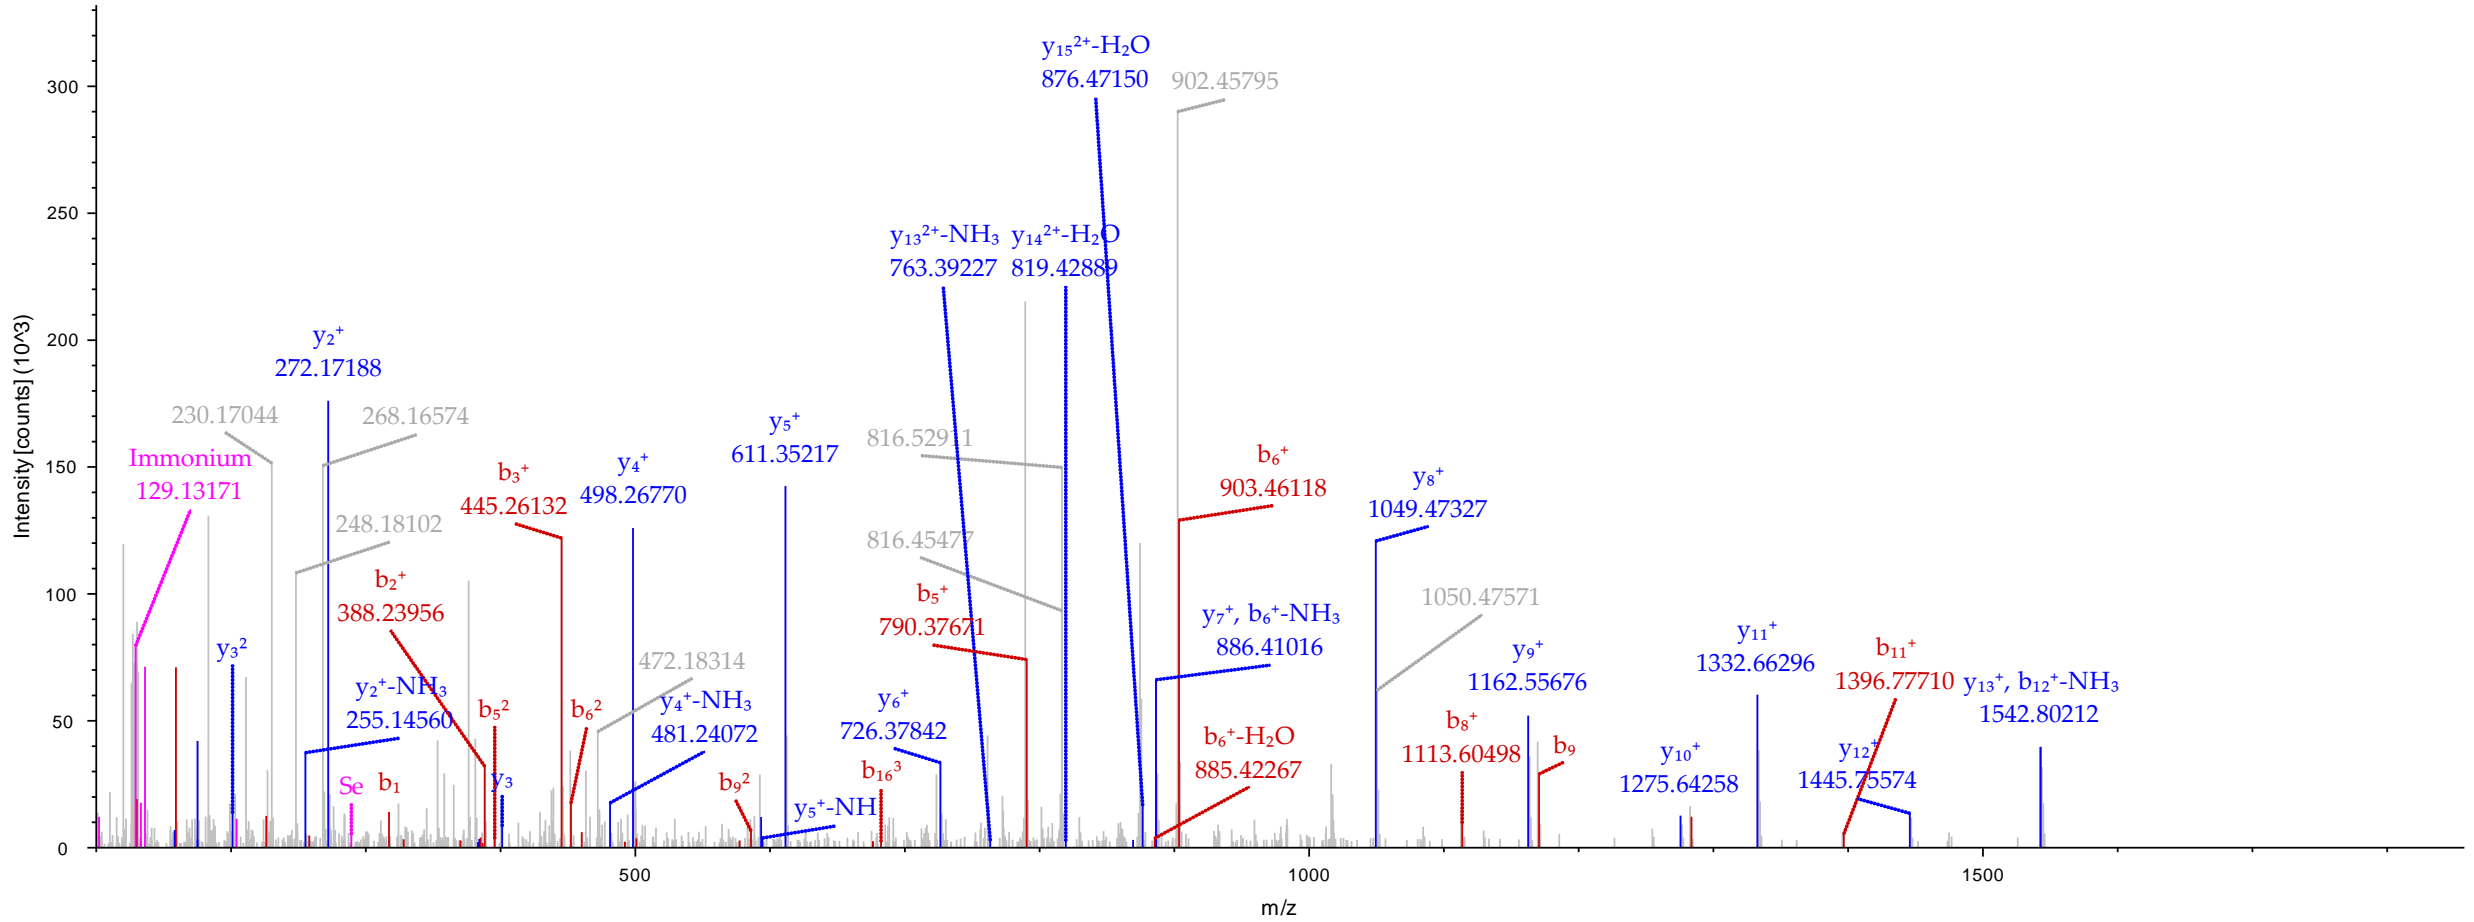

— Pre-H, Precursor, Precursor-H<sub>2</sub>O, Precursor-H<sub>2</sub>O-NH<sub>3</sub>, Precursor-NH<sub>3</sub>, Pre-H    — Immonium  
— y, y-H<sub>2</sub>O, y-NH<sub>3</sub>    — b, b-H<sub>2</sub>O, b-NH<sub>3</sub>



| #1 | Immonium  | b <sup>+</sup> | b <sup>2+</sup> | b <sup>3+</sup> | Seq.              | y <sup>+</sup> | y <sup>2+</sup> | y <sup>3+</sup> | #2 |
|----|-----------|----------------|-----------------|-----------------|-------------------|----------------|-----------------|-----------------|----|
| 1  | 316.21822 | 344.21314      | 172.61021       | 115.40923       | N-TMT6plex        |                |                 |                 | 16 |
| 2  | 86.09643  | 457.29720      | 229.15224       | 153.10392       | L                 | 2113.04330     | 1057.02529      | 705.01928       | 15 |
| 3  | 87.05529  | 571.34013      | 286.17370       | 191.11823       | N                 | 1999.95924     | 1000.48326      | 667.32460       | 14 |
| 4  | 102.05496 | 700.38272      | 350.69500       | 234.13242       | E                 | 1885.91631     | 943.46179       | 629.31029       | 13 |
| 5  | 330.27026 | 1057.64062     | 529.32395       | 353.21839       | K-TMT6plex        | 1756.87371     | 878.94050       | 586.29609       | 12 |
| 6  | 88.03930  | 1172.66756     | 586.83742       | 391.56070       | D                 | 1399.61582     | 700.31155       | 467.21012       | 11 |
| 7  | 181.06077 | 1380.71596     | 690.86162       | 460.91017       | Y-Nitro           | 1284.58888     | 642.79808       | 428.86781       | 10 |
| 8  | 102.05496 | 1509.75856     | 755.38292       | 503.92437       | E                 | 1076.54047     | 538.77387       | 359.51834       | 9  |
| 9  | 86.09643  | 1622.84262     | 811.92495       | 541.61906       | L                 | 947.49788      | 474.25258       | 316.50414       | 8  |
| 10 | 86.09643  | 1735.92669     | 868.46698       | 579.31375       | L                 | 834.41381      | 417.71055       | 278.80946       | 7  |
| 11 | 133.04301 | 1895.95733     | 948.48231       | 632.65730       | C-Carbamidomethyl | 721.32975      | 361.16851       | 241.11477       | 6  |
| 12 | 86.09643  | 2009.04140     | 1005.02434      | 670.35198       | L                 | 561.29910      | 281.15319       | 187.77122       | 5  |
| 13 | 88.03930  | 2124.06834     | 1062.53781      | 708.69430       | D                 | 448.21504      | 224.61116       | 150.07653       | 4  |
| 14 | 30.03383  | 2181.08980     | 1091.04854      | 727.70145       | G                 | 333.18809      | 167.09769       | 111.73422       | 3  |
| 15 | 74.06004  | 2282.13748     | 1141.57238      | 761.38401       | T                 | 276.16663      | 138.58695       | 92.72706        | 2  |
| 16 | 129.11347 |                |                 |                 | R                 | 175.11895      | 88.06311        | 59.04450        | 1  |

JM\_HuMarfanPlasma\_TMT6\_Fr2.raw #54939 RT: 161.3239 min  
 FTMS, 819.7599@hcd30.00, z=+3, Mono m/z=819.75989 Da, MH+=2457.26511 Da, Match Tol.=0.02 Da

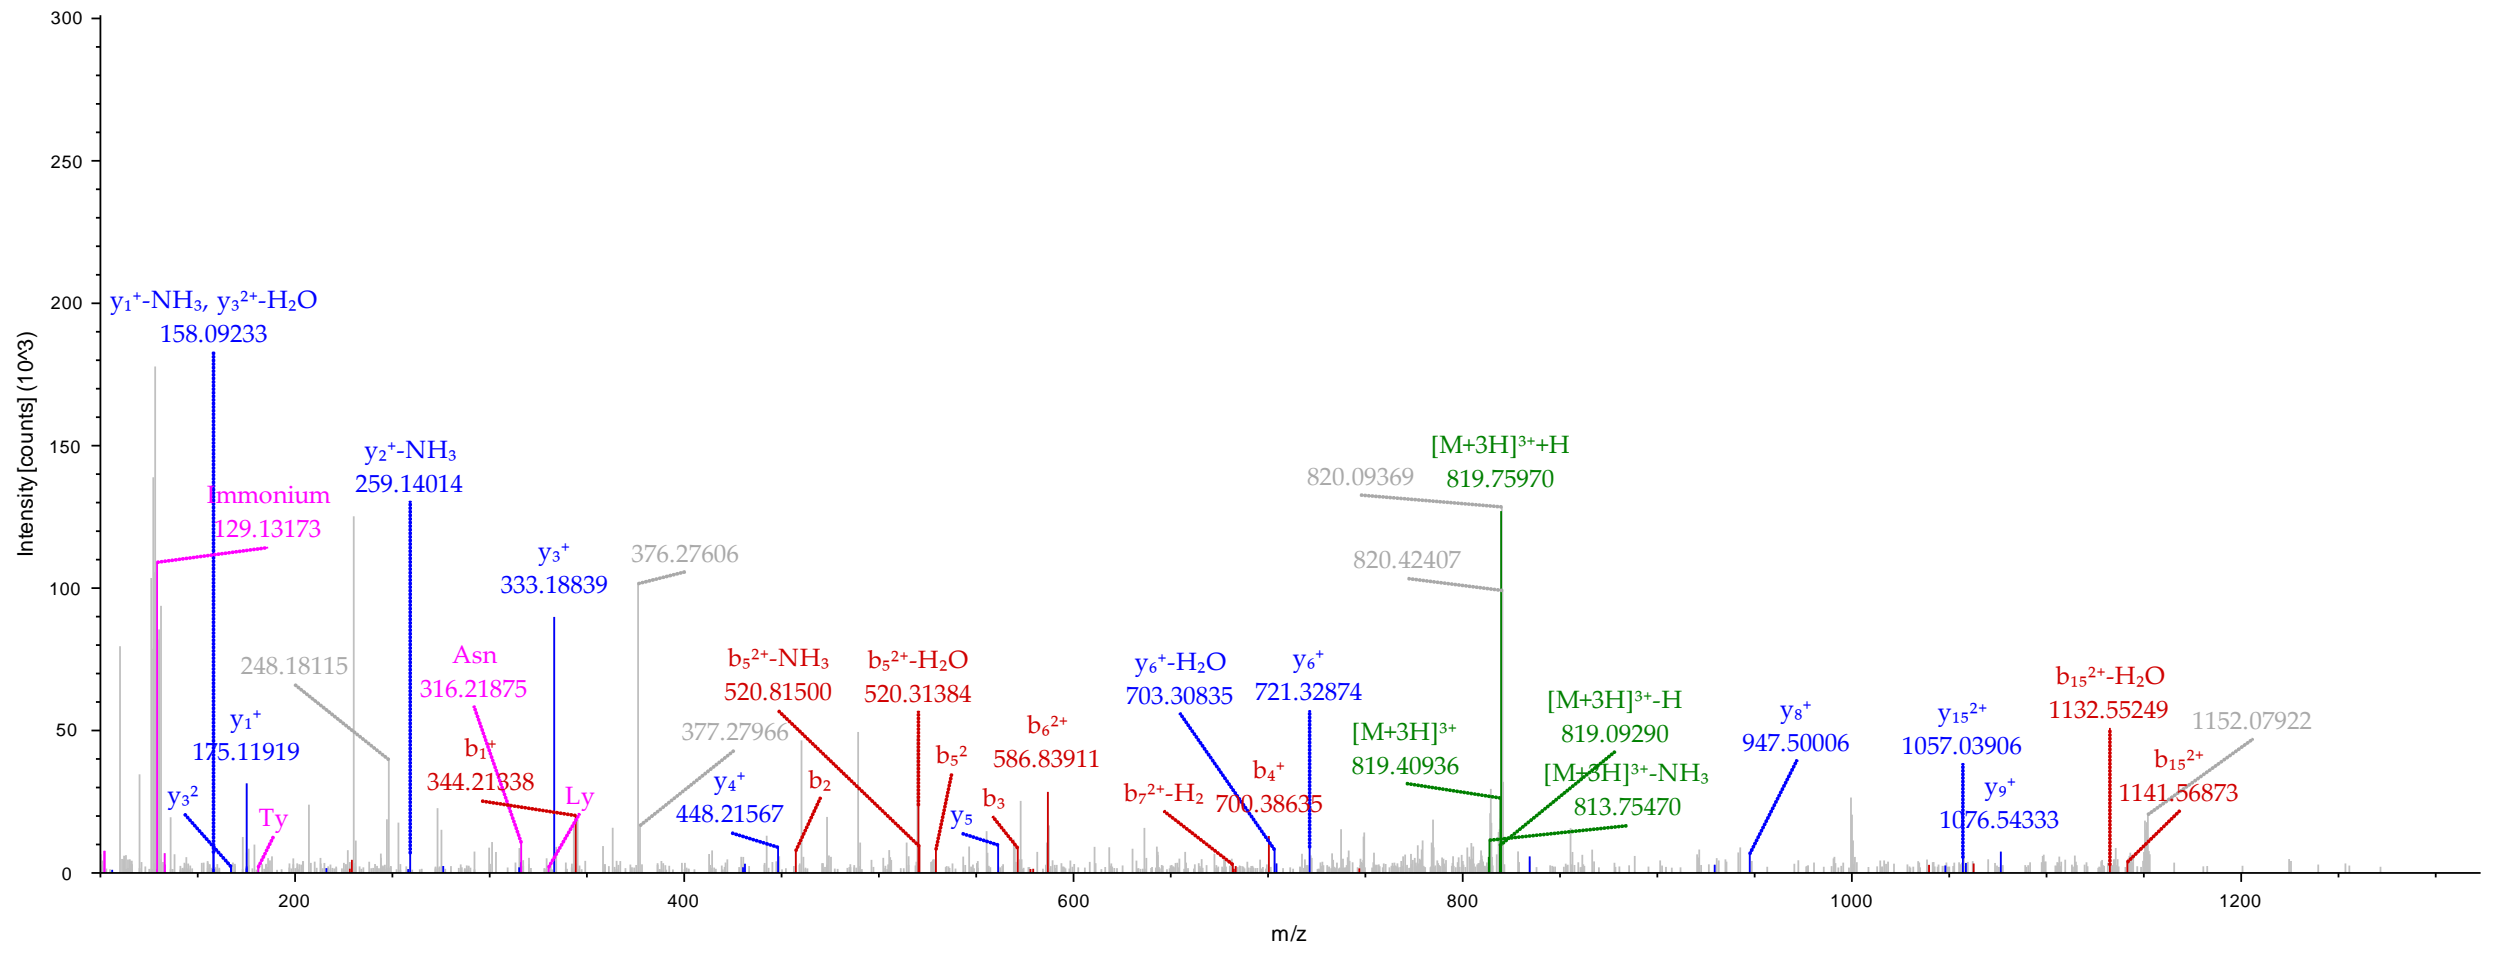

— Pre+H, Precursor, Precursor-H<sub>2</sub>O, Precursor-H<sub>2</sub>O-NH<sub>3</sub>, Precursor-NH<sub>3</sub>, Pre-H  
— y, y-H<sub>2</sub>O, y-NH<sub>3</sub>  
— Immonium  
— b, b-H<sub>2</sub>O, b-NH<sub>3</sub>

| #1 | Immonium  | b <sup>+</sup> | b <sup>2+</sup> | b <sup>3+</sup> | b <sup>4+</sup> | b <sup>5+</sup> | Seq.                | y <sup>+</sup> | y <sup>2+</sup> | y <sup>3+</sup> | y <sup>4+</sup> | y <sup>5+</sup> | #2 |
|----|-----------|----------------|-----------------|-----------------|-----------------|-----------------|---------------------|----------------|-----------------|-----------------|-----------------|-----------------|----|
| 1  | 559.43319 | 587.42810      | 294.21769       | 196.48089       | 147.61248       | 118.29144       | K-TMT6plex-TMT6plex |                |                 |                 |                 |                 | 22 |
| 2  | 70.06513  | 684.48087      | 342.74407       | 228.83181       | 171.87567       | 137.70199       | P                   | 2695.34596     | 1348.17662      | 899.12017       | 674.59195       | 539.87501       | 21 |
| 3  | 72.08078  | 783.54928      | 392.27828       | 261.85461       | 196.64278       | 157.51568       | V                   | 2598.29320     | 1299.65024      | 866.76925       | 650.32876       | 520.46446       | 20 |
| 4  | 88.03930  | 898.57622      | 449.79175       | 300.19693       | 225.39951       | 180.52107       | D                   | 2499.22479     | 1250.11603      | 833.74645       | 625.56165       | 500.65078       | 19 |
| 5  | 102.05496 | 1027.61882     | 514.31305       | 343.21112       | 257.66016       | 206.32958       | E                   | 2384.19784     | 1192.60256      | 795.40413       | 596.80492       | 477.64539       | 18 |
| 6  | 181.06077 | 1235.66722     | 618.33725       | 412.56059       | 309.67226       | 247.93927       | Y-Nitro             | 2255.15525     | 1128.08126      | 752.38993       | 564.54427       | 451.83687       | 17 |
| 7  | 330.27026 | 1592.92512     | 796.96620       | 531.64656       | 398.98674       | 319.39085       | K-TMT6plex          | 2047.10684     | 1024.05706      | 683.04047       | 512.53217       | 410.22719       | 16 |
| 8  | 88.03930  | 1707.95206     | 854.47967       | 569.98887       | 427.74347       | 342.39623       | D                   | 1689.84895     | 845.42811       | 563.95450       | 423.21769       | 338.77561       | 15 |
| 9  | 133.04301 | 1867.98271     | 934.49499       | 623.33242       | 467.75113       | 374.40236       | C-Carbamidomethyl   | 1574.82201     | 787.91464       | 525.61219       | 394.46096       | 315.77022       | 14 |
| 10 | 110.07127 | 2005.04162     | 1003.02445      | 669.01873       | 502.01586       | 401.81415       | H                   | 1414.79136     | 707.89932       | 472.26864       | 354.45330       | 283.76409       | 13 |
| 11 | 86.09643  | 2118.12569     | 1059.56648      | 706.71341       | 530.28688       | 424.43096       | L                   | 1277.73245     | 639.36986       | 426.58233       | 320.18857       | 256.35231       | 12 |
| 12 | 44.04948  | 2189.16280     | 1095.08504      | 730.39245       | 548.04616       | 438.63838       | A                   | 1164.64838     | 582.82783       | 388.88764       | 291.91755       | 233.73550       | 11 |
| 13 | 101.07094 | 2317.22138     | 1159.11433      | 773.07864       | 580.06080       | 464.25010       | Q                   | 1093.61127     | 547.30927       | 365.20861       | 274.15827       | 219.52807       | 10 |
| 14 | 72.08078  | 2416.28979     | 1208.64853      | 806.10145       | 604.82791       | 484.06378       | V                   | 965.55269      | 483.27998       | 322.52241       | 242.14363       | 193.91636       | 9  |
| 15 | 70.06513  | 2513.34255     | 1257.17492      | 838.45237       | 629.09110       | 503.47433       | P                   | 866.48428      | 433.74578       | 289.49961       | 217.37653       | 174.10268       | 8  |
| 16 | 60.04439  | 2600.37458     | 1300.69093      | 867.46305       | 650.84910       | 520.88074       | S                   | 769.43151      | 385.21939       | 257.14869       | 193.11334       | 154.69212       | 7  |
| 17 | 110.07127 | 2737.43349     | 1369.22039      | 913.14935       | 685.11383       | 548.29252       | H                   | 682.39948      | 341.70338       | 228.13801       | 171.35533       | 137.28572       | 6  |
| 18 | 74.06004  | 2838.48117     | 1419.74422      | 946.83191       | 710.37575       | 568.50206       | T                   | 545.34057      | 273.17392       | 182.45171       | 137.09060       | 109.87394       | 5  |
| 19 | 72.08078  | 2937.54959     | 1469.27843      | 979.85471       | 735.14285       | 588.31574       | V                   | 444.29289      | 222.65009       | 148.76915       | 111.82868       | 89.66440        | 4  |
| 20 | 72.08078  | 3036.61800     | 1518.81264      | 1012.87752      | 759.90996       | 608.12942       | V                   | 345.22448      | 173.11588       | 115.74634       | 87.06158        | 69.85072        | 3  |
| 21 | 44.04948  | 3107.65511     | 1554.33120      | 1036.55656      | 777.66924       | 622.33684       | A                   | 246.15607      | 123.58167       | 82.72354        | 62.29447        | 50.03703        | 2  |
| 22 | 129.11347 |                |                 |                 |                 |                 | R                   | 175.11895      | 88.06311        | 59.04450        | 44.53520        | 35.82961        | 1  |



| #1 | Immonium  | b <sup>+</sup> | b <sup>2+</sup> | b <sup>3+</sup> | b <sup>4+</sup> | Seq.       | y <sup>+</sup> | y <sup>2+</sup> | y <sup>3+</sup> | y <sup>4+</sup> | #2 |
|----|-----------|----------------|-----------------|-----------------|-----------------|------------|----------------|-----------------|-----------------|-----------------|----|
| 1  | 289.20732 | 317.20224      | 159.10476       | 106.40560       | 80.05602        | S-TMT6plex |                |                 |                 |                 | 22 |
| 2  | 104.05285 | 448.24272      | 224.62500       | 150.08576       | 112.81614       | M          | 2946.51840     | 1473.76284      | 982.84432       | 737.38506       | 21 |
| 3  | 30.03383  | 505.26419      | 253.13573       | 169.09291       | 127.07150       | G          | 2815.47791     | 1408.24259      | 939.16416       | 704.62494       | 20 |
| 4  | 30.03383  | 562.28565      | 281.64646       | 188.10007       | 141.32687       | G          | 2758.45645     | 1379.73186      | 920.15700       | 690.36957       | 19 |
| 5  | 330.27026 | 919.54354      | 460.27541       | 307.18603       | 230.64134       | K-TMT6plex | 2701.43499     | 1351.22113      | 901.14985       | 676.11420       | 18 |
| 6  | 102.05496 | 1048.58614     | 524.79671       | 350.20023       | 262.90199       | E          | 2344.17709     | 1172.59218      | 782.06388       | 586.79973       | 17 |
| 7  | 88.03930  | 1163.61308     | 582.31018       | 388.54254       | 291.65873       | D          | 2215.13450     | 1108.07089      | 739.04968       | 554.53908       | 16 |
| 8  | 86.09643  | 1276.69714     | 638.85221       | 426.23723       | 319.92974       | L          | 2100.10755     | 1050.55742      | 700.70737       | 525.78235       | 15 |
| 9  | 86.09643  | 1389.78121     | 695.39424       | 463.93192       | 348.20076       | I          | 1987.02349     | 994.01538       | 663.01268       | 497.51133       | 14 |
| 10 | 204.07675 | 1620.84560     | 810.92644       | 540.95338       | 405.96686       | W-Nitro    | 1873.93943     | 937.47335       | 625.31799       | 469.24031       | 13 |
| 11 | 102.05496 | 1749.88819     | 875.44773       | 583.96758       | 438.22751       | E          | 1642.87504     | 821.94116       | 548.29653       | 411.47422       | 12 |
| 12 | 86.09643  | 1862.97226     | 931.98977       | 621.66227       | 466.49852       | L          | 1513.83244     | 757.41986       | 505.28233       | 379.21357       | 11 |
| 13 | 86.09643  | 1976.05632     | 988.53180       | 659.35696       | 494.76954       | L          | 1400.74838     | 700.87783       | 467.58764       | 350.94255       | 10 |
| 14 | 87.05529  | 2090.09925     | 1045.55326      | 697.37127       | 523.28027       | N          | 1287.66431     | 644.33580       | 429.89296       | 322.67154       | 9  |
| 15 | 101.07094 | 2218.15782     | 1109.58255      | 740.05746       | 555.29491       | Q          | 1173.62139     | 587.31433       | 391.87865       | 294.16080       | 8  |
| 16 | 44.04948  | 2289.19494     | 1145.10111      | 763.73650       | 573.05419       | A          | 1045.56281     | 523.28504       | 349.19245       | 262.14616       | 7  |
| 17 | 101.07094 | 2417.25352     | 1209.13040      | 806.42269       | 605.06884       | Q          | 974.52570      | 487.76649       | 325.51342       | 244.38688       | 6  |
| 18 | 102.05496 | 2546.29611     | 1273.65169      | 849.43689       | 637.32948       | E          | 846.46712      | 423.73720       | 282.82722       | 212.37224       | 5  |
| 19 | 110.07127 | 2683.35502     | 1342.18115      | 895.12319       | 671.59421       | H          | 717.42453      | 359.21590       | 239.81303       | 180.11159       | 4  |
| 20 | 120.08078 | 2830.42343     | 1415.71536      | 944.14600       | 708.36132       | F          | 580.36561      | 290.68645       | 194.12672       | 145.84686       | 3  |
| 21 | 30.03383  | 2887.44490     | 1444.22609      | 963.15315       | 722.61668       | G          | 433.29720      | 217.15224       | 145.10392       | 109.07976       | 2  |
| 22 | 330.27026 |                |                 |                 |                 | K-TMT6plex | 376.27574      | 188.64151       | 126.09676       | 94.82439        | 1  |

JM\_HuMarfanPlasma\_TMT2.raw #123068 RT: 339.2581 min  
 FTMS, 816.9379@hcd30.00, z=+4, Mono m/z=816.43823 Da, MH+=3262.73110 Da, Match Tol.=0.02 Da

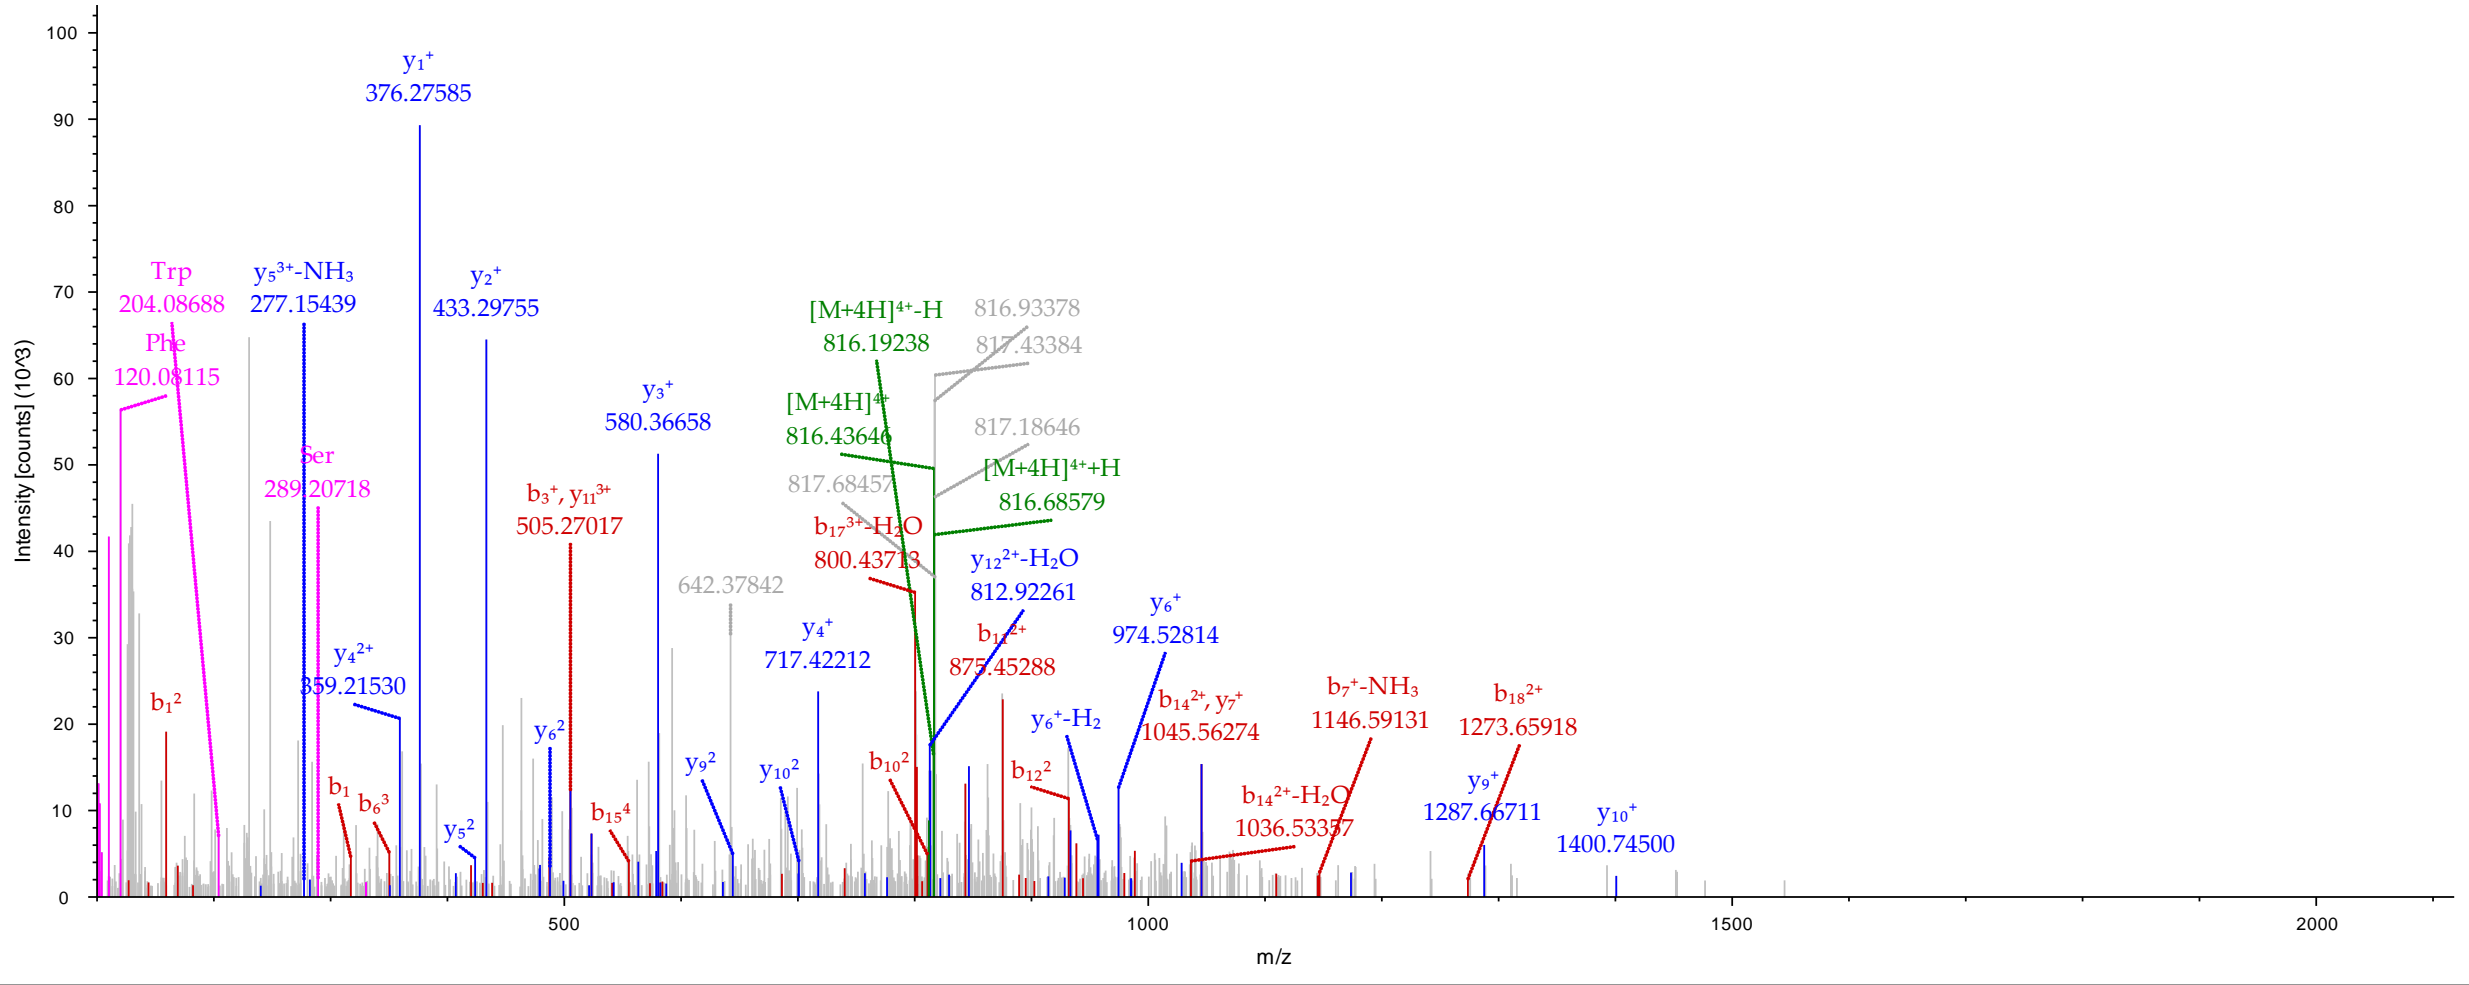

— Pre+H, Precursor, Precursor-H<sub>2</sub>O, Precursor-H<sub>2</sub>O-NH<sub>3</sub>, Precursor-NH<sub>3</sub>, Pre-H
 — Immonium

— y, y-H<sub>2</sub>O, y-NH<sub>3</sub>
— b, b-H<sub>2</sub>O, b-NH<sub>3</sub>

| #1 | Immonium  | b <sup>+</sup> | b <sup>2+</sup> | b <sup>3+</sup> | b <sup>4+</sup> | Seq.       | y <sup>+</sup> | y <sup>2+</sup> | y <sup>3+</sup> | y <sup>4+</sup> | #2 |
|----|-----------|----------------|-----------------|-----------------|-----------------|------------|----------------|-----------------|-----------------|-----------------|----|
| 1  | 273.21241 | 301.20732      | 151.10730       | 101.07396       | 76.05729        | A-TMT6plex |                |                 |                 |                 | 20 |
| 2  | 88.03930  | 416.23427      | 208.62077       | 139.41627       | 104.81402       | D          | 2274.14914     | 1137.57821      | 758.72123       | 569.29274       | 19 |
| 3  | 44.04948  | 487.27138      | 244.13933       | 163.09531       | 122.57330       | A          | 2159.12220     | 1080.06474      | 720.37892       | 540.53601       | 18 |
| 4  | 72.08078  | 586.33979      | 293.67353       | 196.11812       | 147.34041       | V          | 2088.08509     | 1044.54618      | 696.69988       | 522.77673       | 17 |
| 5  | 74.06004  | 687.38747      | 344.19737       | 229.80067       | 172.60233       | T          | 1989.01667     | 995.01198       | 663.67708       | 498.00963       | 16 |
| 6  | 86.09643  | 800.47154      | 400.73941       | 267.49536       | 200.87334       | L          | 1887.96900     | 944.48814       | 629.99452       | 472.74771       | 15 |
| 7  | 88.03930  | 915.49848      | 458.25288       | 305.83768       | 229.63008       | D          | 1774.88493     | 887.94610       | 592.29983       | 444.47669       | 14 |
| 8  | 30.03383  | 972.51994      | 486.76361       | 324.84483       | 243.88544       | G          | 1659.85799     | 830.43263       | 553.95751       | 415.71995       | 13 |
| 9  | 30.03383  | 1029.54141     | 515.27434       | 343.85199       | 258.14081       | G          | 1602.83652     | 801.92190       | 534.95036       | 401.46459       | 12 |
| 10 | 120.08078 | 1176.60982     | 588.80855       | 392.87479       | 294.90791       | F          | 1545.81506     | 773.41117       | 515.94320       | 387.20922       | 11 |
| 11 | 86.09643  | 1289.69388     | 645.35058       | 430.56948       | 323.17893       | I          | 1398.74665     | 699.87696       | 466.92040       | 350.44212       | 10 |
| 12 | 181.06077 | 1497.74229     | 749.37478       | 499.91895       | 375.19103       | Y-Nitro    | 1285.66258     | 643.33493       | 429.22571       | 322.17110       | 9  |
| 13 | 102.05496 | 1626.78488     | 813.89608       | 542.93315       | 407.45168       | E          | 1077.61418     | 539.31073       | 359.87624       | 270.15900       | 8  |
| 14 | 44.04948  | 1697.82200     | 849.41464       | 566.61218       | 425.21096       | A          | 948.57158      | 474.78943       | 316.86205       | 237.89835       | 7  |
| 15 | 30.03383  | 1754.84346     | 877.92537       | 585.61934       | 439.46632       | G          | 877.53447      | 439.27087       | 293.18301       | 220.13907       | 6  |
| 16 | 86.09643  | 1867.92752     | 934.46740       | 623.31403       | 467.73734       | L          | 820.51301      | 410.76014       | 274.17585       | 205.88371       | 5  |
| 17 | 44.04948  | 1938.96464     | 969.98596       | 646.99306       | 485.49662       | A          | 707.42894      | 354.21811       | 236.48117       | 177.61269       | 4  |
| 18 | 70.06513  | 2036.01740     | 1018.51234      | 679.34399       | 509.75981       | P          | 636.39183      | 318.69955       | 212.80213       | 159.85341       | 3  |
| 19 | 136.07569 | 2199.08073     | 1100.04400      | 733.69843       | 550.52564       | Y          | 539.33906      | 270.17317       | 180.45121       | 135.59022       | 2  |
| 20 | 330.27026 |                |                 |                 |                 | K-TMT6plex | 376.27574      | 188.64151       | 126.09676       | 94.82439        | 1  |





| #1 | Immonium  | b <sup>+</sup> | b <sup>2+</sup> | b <sup>3+</sup> | b <sup>4+</sup> | Seq.              | y <sup>+</sup> | y <sup>2+</sup> | y <sup>3+</sup> | y <sup>4+</sup> | #2 |
|----|-----------|----------------|-----------------|-----------------|-----------------|-------------------|----------------|-----------------|-----------------|-----------------|----|
| 1  | 331.21789 | 359.21280      | 180.11004       | 120.40912       | 90.55866        | E-TMT6plex        |                |                 |                 |                 | 29 |
| 2  | 72.08078  | 458.28122      | 229.64425       | 153.43192       | 115.32576       | V                 | 3321.48709     | 1661.24718      | 1107.83388      | 831.12723       | 28 |
| 3  | 72.08078  | 557.34963      | 279.17845       | 186.45473       | 140.09286       | V                 | 3222.41867     | 1611.71297      | 1074.81108      | 806.36013       | 27 |
| 4  | 60.04439  | 644.38166      | 322.69447       | 215.46540       | 161.85087       | S                 | 3123.35026     | 1562.17877      | 1041.78827      | 781.59302       | 26 |
| 5  | 86.09643  | 757.46572      | 379.23650       | 253.16009       | 190.12189       | L                 | 3036.31823     | 1518.66275      | 1012.77759      | 759.83501       | 25 |
| 6  | 74.06004  | 858.51340      | 429.76034       | 286.84265       | 215.38381       | T                 | 2923.23417     | 1462.12072      | 975.08291       | 731.56400       | 24 |
| 7  | 102.05496 | 987.55599      | 494.28163       | 329.85685       | 247.64446       | E                 | 2822.18649     | 1411.59688      | 941.40035       | 706.30208       | 23 |
| 8  | 44.04948  | 1058.59311     | 529.80019       | 353.53589       | 265.40373       | A                 | 2693.14389     | 1347.07559      | 898.38615       | 674.04143       | 22 |
| 9  | 133.04301 | 1218.62376     | 609.81552       | 406.87944       | 305.41140       | C-Carbamidomethyl | 2622.10678     | 1311.55703      | 874.70711       | 656.28215       | 21 |
| 10 | 133.04301 | 1378.65440     | 689.83084       | 460.22299       | 345.41906       | C-Carbamidomethyl | 2462.07613     | 1231.54170      | 821.36356       | 616.27449       | 20 |
| 11 | 44.04948  | 1449.69152     | 725.34940       | 483.90202       | 363.17834       | A                 | 2302.04548     | 1151.52638      | 768.02001       | 576.26683       | 19 |
| 12 | 102.05496 | 1578.73411     | 789.87069       | 526.91622       | 395.43899       | E                 | 2231.00837     | 1116.00782      | 744.34097       | 558.50755       | 18 |
| 13 | 30.03383  | 1635.75557     | 818.38143       | 545.92338       | 409.69435       | G                 | 2101.96578     | 1051.48653      | 701.32678       | 526.24690       | 17 |
| 14 | 44.04948  | 1706.79269     | 853.89998       | 569.60241       | 427.45363       | A                 | 2044.94431     | 1022.97580      | 682.31962       | 511.99154       | 16 |
| 15 | 88.03930  | 1821.81963     | 911.41345       | 607.94473       | 456.21037       | D                 | 1973.90720     | 987.45724       | 658.64058       | 494.23226       | 15 |
| 16 | 70.06513  | 1918.87239     | 959.93984       | 640.29565       | 480.47356       | P                 | 1858.88026     | 929.94377       | 620.29827       | 465.47552       | 14 |
| 17 | 88.03930  | 2033.89934     | 1017.45331      | 678.63796       | 509.23029       | D                 | 1761.82749     | 881.41738       | 587.94735       | 441.21233       | 13 |
| 18 | 133.04301 | 2193.92999     | 1097.46863      | 731.98151       | 549.23795       | C-Carbamidomethyl | 1646.80055     | 823.90391       | 549.60503       | 412.45559       | 12 |
| 19 | 181.06077 | 2401.97839     | 1201.49283      | 801.33098       | 601.25006       | Y-Nitro           | 1486.76990     | 743.88859       | 496.26148       | 372.44793       | 11 |
| 20 | 88.03930  | 2517.00534     | 1259.00631      | 839.67330       | 630.00679       | D                 | 1278.72150     | 639.86439       | 426.91202       | 320.43583       | 10 |
| 21 | 74.06004  | 2618.05301     | 1309.53015      | 873.35586       | 655.26871       | T                 | 1163.69455     | 582.35091       | 388.56970       | 291.67910       | 9  |
| 22 | 129.11347 | 2774.15412     | 1387.58070      | 925.38956       | 694.29399       | R                 | 1062.64687     | 531.82708       | 354.88714       | 266.41718       | 8  |
| 23 | 74.06004  | 2875.20180     | 1438.10454      | 959.07212       | 719.55591       | T                 | 906.54576      | 453.77652       | 302.85344       | 227.39190       | 7  |
| 24 | 60.04439  | 2962.23383     | 1481.62055      | 988.08279       | 741.31392       | S                 | 805.49808      | 403.25268       | 269.17088       | 202.12998       | 6  |
| 25 | 44.04948  | 3033.27095     | 1517.13911      | 1011.76183      | 759.07319       | A                 | 718.46606      | 359.73667       | 240.16020       | 180.37197       | 5  |
| 26 | 86.09643  | 3146.35501     | 1573.68114      | 1049.45652      | 787.34421       | L                 | 647.42894      | 324.21811       | 216.48117       | 162.61269       | 4  |
| 27 | 60.04439  | 3233.38704     | 1617.19716      | 1078.46720      | 809.10222       | S                 | 534.34488      | 267.67608       | 178.78648       | 134.34168       | 3  |
| 28 | 44.04948  | 3304.42415     | 1652.71571      | 1102.14623      | 826.86150       | A                 | 447.31285      | 224.16006       | 149.77580       | 112.58367       | 2  |
| 29 | 330.27026 |                |                 |                 |                 | K-TMT6plex        | 376.27574      | 188.64151       | 126.09676       | 94.82439        | 1  |

Nitro-Tyr immonium ion is detected in MS/MS spectra and added brown colored in the following spectrum

JM\_HuMarfanPlasma\_TMT4\_Fr1.raw #70987 RT: 207.2621 min  
 FTMS, 920.9316@hcd30.00, z=+4, Mono m/z=920.68170 Da, MH+=3679.70498 Da, Match Tol.=0.02 Da

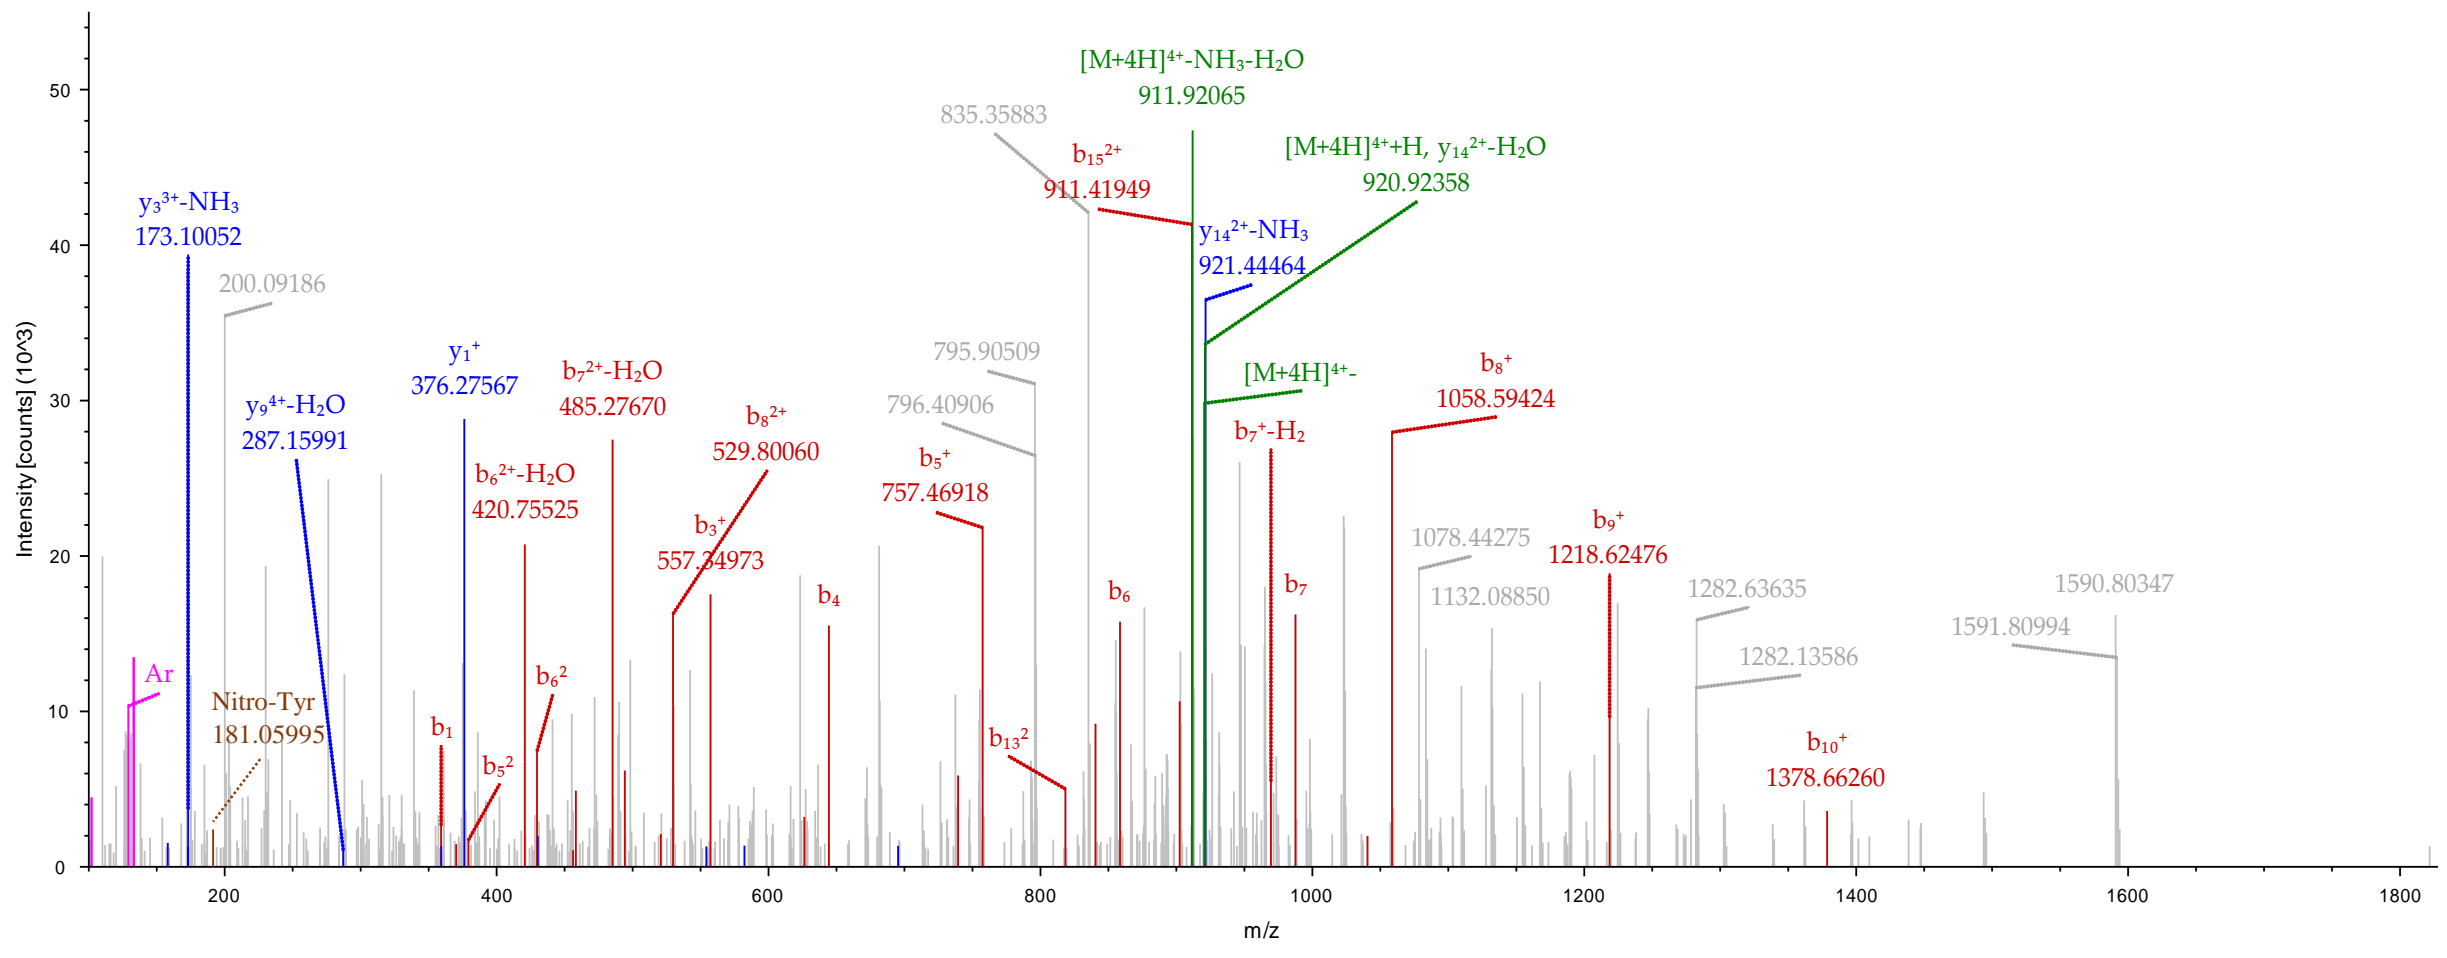

— Pre+H, Precursor, Precursor-H<sub>2</sub>O, Precursor-H<sub>2</sub>O-NH<sub>3</sub>, Precursor-NH<sub>3</sub>, Pre-H  
— y, y-H<sub>2</sub>O, y-NH<sub>3</sub>  
— Immonium  
— b, b-H<sub>2</sub>O, b-NH<sub>3</sub>
